# Supplementary material for: Microvesicles from brain-extract—treated mesenchymal stem cells improve neurological functions in a rat model of ischemic stroke
Source: PubMed Central journal article supplement (PMC5016792; doi:10.1038/srep33038), 2016-09-09
Supplement: srep33038-s1.pdf [file srep33038-s1.pdf]

***Supplementary Online Information***

**Microvesicles from brain-extract-treated mesenchymal stem cells improve neurological functions in a rat model of ischemic stroke**

Ji Yong Lee, Eiru Kim, Seong-Mi Choi, Dong-Wook Kim, Kwang Pyo Kim, Insuk Lee, and Han-Soo Kim

**□ Contents**

- **Supplementary Figure S1**
- **Supplementary Figure S2**
- **Supplementary Figure S3**
- **Supplementary Table S1**
- **Supplementary Table S2**
- **Supplementary Table S3**
- **Supplementary Table S4**
- **Supplementary Table S5**
- **Supplementary Table S6**

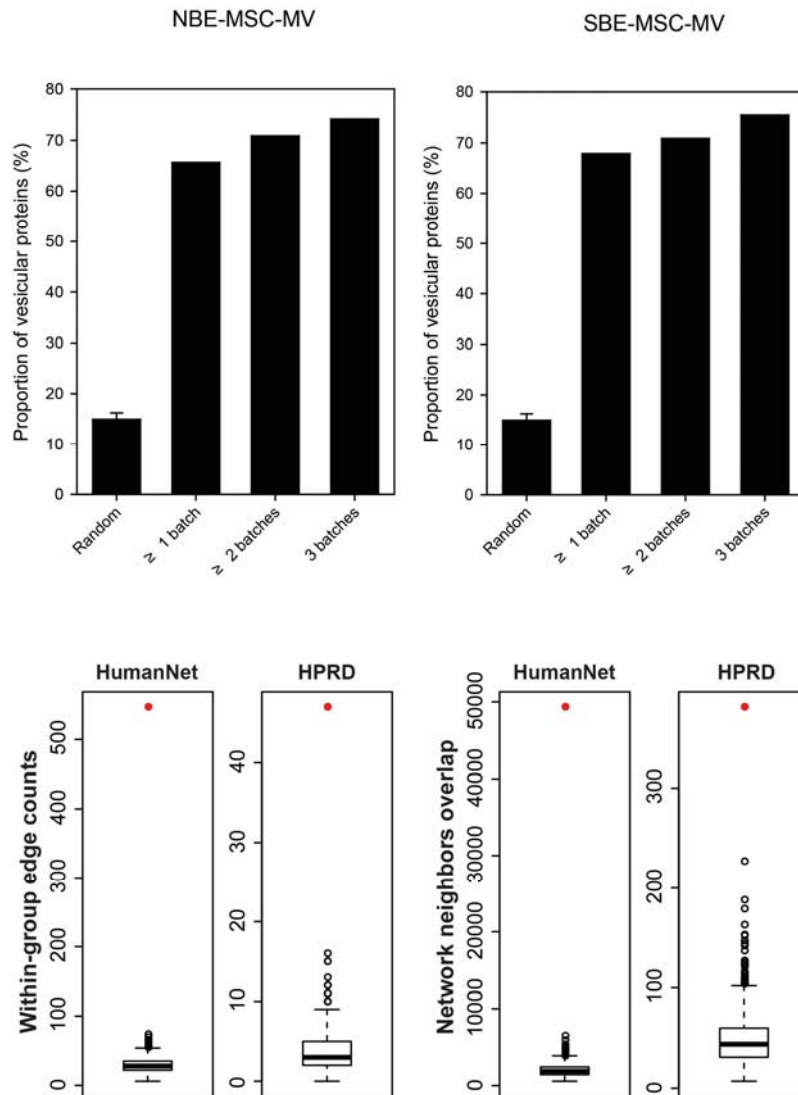

**Supplementary Figure S1. Functional analysis of SBE-MSC-MV proteome.** (A) Both NBE-MSC-MV and SBE-MSC-MV proteomes were enriched for vesicular proteins annotated in the Vesiclepedia database. The degree of enrichment for vesicular proteins was higher for proteins identified in multiple batches. (B) Plots from ‘within-group connectivity’ and ‘sharing network neighbor’ analysis of the SBE-MSC-MV proteome, for a functional network, HumanNet, and a protein-protein interaction network, HPRD. Box-and-whisker plots represent ‘within-group edge count’ and ‘network neighbors overlap’ scores for 1,000 random gene sets of equal size, and red dots represent scores for the SBE-MSC-MV proteome.

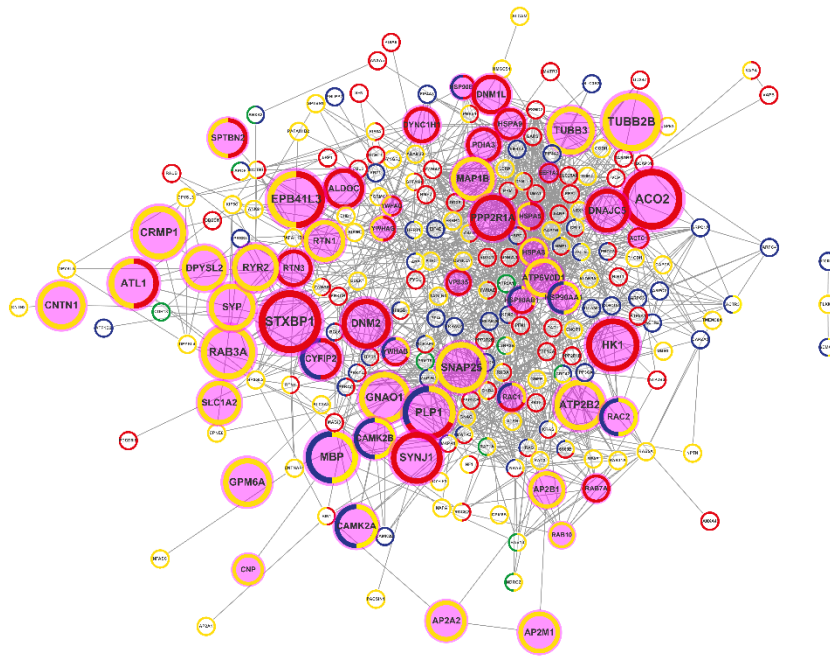

**Supplementary Figure S2. A network of SBE-MSC-MV proteins belonging to four functional categories involved in tissue repair.** The circumference of each node represents the proportion of proteins from each of the four functional categories: green for angiogenesis, blue for anti-inflammation, yellow for neurogenesis, and red for apoptosis. Upregulated SBE-MSC-MV proteins are shown as purple nodes. The size of the purple nodes represents the fold change.

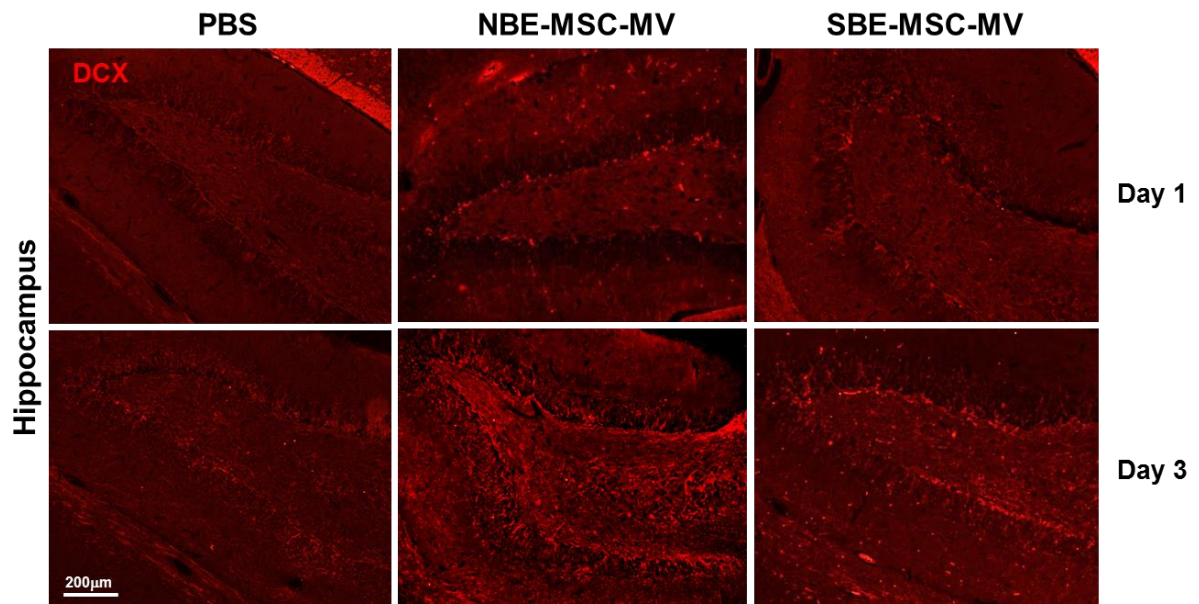

**Supplementary Figure S3. SBE-MSC-MV and NBE-MSC-MV promoted neurogenesis in the hippocampal area in the ischemic rat brain.** Immunostaining of DCX in the hippocampal region of PBS-treated control, NBE-MSC-MV-treated and SBE-MSC-MV-treated rats at Day 1 and Day 3 post-treatment.

**Supplementary table S1.** A list of identified proteome from NBE-MSC-MV and SBE-MSC-MV by LC-MS/MS upon tissue regeneration using MSBlender. Spectral count would not be integer because MSBlender distributes 1/N count scores when a spectrum mapped to N peptides

| Protein         | Gene Symbol | Length of proteins | NBE-MSC-MV batch 1 | NBE-MSC-MV batch 2 | NBE-MSC-MV batch 3 | SBE-MSC-MV batch 1 | SBE-MSC-MV batch 2 | SBE-MSC-MV batch 3 |
|-----------------|-------------|--------------------|--------------------|--------------------|--------------------|--------------------|--------------------|--------------------|
| ENSP0000000233  | ARF5        | 180                | 8                  | 30                 | 0                  | 12                 | 18                 | 21                 |
| ENSP0000000412  | M6PR        | 277                | 1                  | 1                  | 1                  | 0                  | 1                  | 0                  |
| ENSP00000005257 | RALA        | 206                | 3                  | 7                  | 4                  | 4                  | 7                  | 4                  |
| ENSP00000013034 | NME1        | 177                | 1                  | 4                  | 0                  | 2                  | 2                  | 1                  |
| ENSP00000022615 | VDAC3       | 283                | 1                  | 0                  | 0                  | 0                  | 0                  | 1                  |
| ENSP00000050961 | ZFHX4       | 3567               | 1                  | 0                  | 0                  | 0                  | 0                  | 0                  |
| ENSP00000054666 | VAMP3       | 100                | 15                 | 22                 | 9                  | 13                 | 16                 | 15                 |
| ENSP00000078429 | GNA11       | 359                | 1                  | 1                  | 1                  | 0                  | 0                  | 0                  |
| ENSP00000157812 | PSMC4       | 418                | 1                  | 0                  | 0                  | 0                  | 1                  | 0                  |
| ENSP00000164139 | PYGM        | 842                | 9                  | 9                  | 9                  | 11                 | 20                 | 8                  |
| ENSP00000164247 | KCNAB2      | 367                | 1                  | 0                  | 1                  | 0                  | 0                  | 0                  |
| ENSP00000167586 | KRT14       | 472                | 4                  | 21                 | 18                 | 4                  | 5                  | 3                  |
| ENSP00000172853 | NEB         | 6669               | 1                  | 0                  | 0                  | 0                  | 0                  | 0                  |
| ENSP00000193403 | ACTN1       | 892                | 2                  | 0                  | 0                  | 1                  | 0                  | 0                  |
| ENSP00000195649 | SNAP91      | 902                | 4                  | 1                  | 2                  | 4                  | 0                  | 0                  |
| ENSP00000196371 | OXCT1       | 520                | 1                  | 3                  | 0                  | 0                  | 0                  | 0                  |
| ENSP00000198765 | CPNE3       | 537                | 4                  | 0                  | 0                  | 3                  | 0                  | 0                  |
| ENSP00000202028 | EPB41L1     | 779                | 1                  | 2                  | 0                  | 0                  | 0                  | 1                  |
| ENSP00000207457 | TEKT2       | 430                | 1                  | 0                  | 0                  | 0                  | 0                  | 0                  |
| ENSP00000211372 | RPS18       | 152                | 1                  | 7                  | 0                  | 2                  | 8                  | 1                  |
| ENSP00000215095 | STX1B       | 288                | 34                 | 55                 | 39                 | 22                 | 33                 | 26                 |
| ENSP00000215567 | TECR        | 308                | 1                  | 3                  | 2                  | 1                  | 3                  | 0                  |
| ENSP00000215832 | MAPK1       | 360                | 4                  | 8.5                | 5                  | 4                  | 5                  | 4                  |
| ENSP00000215904 | PDXP        | 296                | 2                  | 0                  | 0                  | 1                  | 0                  | 0                  |
| ENSP00000216121 | NIPSNAP1    | 284                | 2                  | 3                  | 7                  | 1                  | 5                  | 1                  |
| ENSP00000216155 | SYNGR1      | 118                | 5                  | 3                  | 3                  | 7                  | 2                  | 0                  |
| ENSP00000216181 | MYH9        | 1960               | 2                  | 3                  | 1                  | 0                  | 2                  | 0                  |
| ENSP00000216254 | ACO2        | 780                | 53                 | 41                 | 29                 | 40                 | 61                 | 42                 |
| ENSP00000216281 | HSP90AA1    | 732                | 63.5               | 85.5               | 78                 | 68                 | 121                | 96                 |
| ENSP00000216442 | ATP6V1D     | 247                | 2                  | 7                  | 6                  | 4                  | 9.5                | 3                  |
| ENSP00000216775 | CPNE6       | 557                | 7                  | 3                  | 1                  | 7.5                | 3                  | 0                  |
| ENSP00000216962 | PYGB        | 843                | 19                 | 20                 | 21                 | 26                 | 36                 | 24                 |
| ENSP00000217133 | TUBB1       | 451                | 46                 | 94                 | 74                 | 49                 | 77                 | 61                 |
| ENSP00000217182 | EEF1A2      | 463                | 41                 | 47                 | 37.5               | 44.5               | 46                 | 29                 |
| ENSP00000217420 | SLC32A1     | 525                | 1                  | 2                  | 1                  | 0                  | 1                  | 0                  |
| ENSP00000217426 | AHCY        | 432                | 2                  | 5                  | 6                  | 4                  | 2                  | 1                  |
| ENSP00000217456 | APMAP       | 416                | 3                  | 0                  | 1                  | 0                  | 0                  | 0                  |
| ENSP00000217971 | PGRMC1      | 195                | 3                  | 4                  | 4                  | 3                  | 3                  | 4                  |
| ENSP00000218348 | USP11       | 963                | 2                  | 0                  | 1                  | 1                  | 1                  | 0                  |
| ENSP00000218439 | MAGED2      | 606                | 1                  | 0                  | 0                  | 1                  | 0                  | 0                  |
| ENSP00000218548 | ATP12A      | 1045               | 22                 | 27                 | 25                 | 18                 | 18                 | 21                 |
| ENSP00000218789 | ARHGEF7     | 705                | 1                  | 0                  | 0                  | 0                  | 0                  | 0                  |
| ENSP00000219599 | CRYM        | 314                | 1                  | 0                  | 0                  | 1                  | 1                  | 2                  |
| ENSP00000220325 | EHD4        | 541                | 1                  | 0                  | 0                  | 0                  | 0                  | 0                  |
| ENSP00000220584 | FDFT1       | 417                | 1                  | 0                  | 0                  | 0                  | 0                  | 0                  |
| ENSP00000220931 | NCALD       | 193                | 3                  | 7                  | 0                  | 3                  | 1                  | 0                  |
| ENSP00000221138 | PPP2CB      | 309                | 5                  | 6                  | 4                  | 4                  | 7                  | 2                  |
| ENSP00000221419 | HNRNPL      | 589                | 1                  | 2                  | 1                  | 0                  | 2                  | 0                  |
| ENSP00000221485 | SLC17A7     | 560                | 8                  | 2                  | 4                  | 6                  | 4                  | 4                  |
| ENSP00000222120 | RAB3D       | 219                | 17.5               | 20.5               | 16.5               | 15                 | 26                 | 24                 |
| ENSP00000222256 | RAB3A       | 220                | 8.5                | 32.5               | 28                 | 15.5               | 34                 | 20                 |
| ENSP00000222286 | GAPDHS      | 408                | 27                 | 36                 | 31                 | 24                 | 39                 | 26                 |

|                 |          |      |      |      |     |       |      |      |
|-----------------|----------|------|------|------|-----|-------|------|------|
| ENSP00000222330 | GSK3A    | 483  | 2    | 3    | 1   | 0     | 5    | 0    |
| ENSP00000222673 | OGDH     | 1023 | 4    | 1    | 0   | 4     | 2    | 1    |
| ENSP00000222812 | STX1A    | 288  | 19   | 27   | 12  | 8     | 16   | 12   |
| ENSP00000223073 | RBM28    | 759  | 1    | 0    | 0   | 0     | 0    | 0    |
| ENSP00000223136 | FIS1     | 152  | 1    | 5    | 0   | 0     | 1    | 0    |
| ENSP00000223836 | AK1      | 210  | 2    | 6    | 0   | 1     | 7    | 3    |
| ENSP00000224784 | ACTA2    | 377  | 69   | 141  | 129 | 87    | 120  | 102  |
| ENSP00000225282 | NSF      | 644  | 28   | 46   | 33  | 33    | 45.5 | 22   |
| ENSP00000225430 | RPL19    | 196  | 2    | 2    | 1   | 1     | 5    | 5    |
| ENSP00000225792 | DDX5     | 614  | 2    | 2    | 2   | 3     | 4    | 0    |
| ENSP00000225899 | KRT32    | 448  | 1    | 0    | 1   | 0     | 0    | 0    |
| ENSP00000226218 | VTN      | 478  | 1    | 0    | 0   | 0     | 0    | 0    |
| ENSP00000226253 | ALDOC    | 364  | 21.5 | 36   | 27  | 24.5  | 34   | 28   |
| ENSP00000226574 | NFKB1    | 969  | 1    | 0    | 0   | 0     | 0    | 0    |
| ENSP00000226760 | WFS1     | 890  | 3    | 2    | 2   | 1     | 3    | 0    |
| ENSP00000226796 | GAR1     | 217  | 1    | 0    | 0   | 0     | 0    | 0    |
| ENSP00000227157 | LDHA     | 241  | 6    | 0    | 1   | 5     | 0    | 2    |
| ENSP00000227378 | HSPA8    | 646  | 109  | 189  | 158 | 117.5 | 206  | 87   |
| ENSP00000228140 | RPS13    | 148  | 2    | 6    | 0   | 1     | 2    | 1    |
| ENSP00000228318 | SLC25A3  | 362  | 1    | 3    | 0   | 2     | 1    | 1    |
| ENSP00000228825 | ARPC3    | 178  | 2    | 6    | 0   | 2     | 5    | 4    |
| ENSP00000229239 | GAPDH    | 335  | 35   | 87   | 65  | 24    | 82   | 72   |
| ENSP00000229264 | GNB3     | 340  | 6    | 11   | 11  | 9     | 11   | 7    |
| ENSP00000229268 | USP5     | 858  | 2    | 3    | 3   | 3     | 7    | 4    |
| ENSP00000229270 | TP11     | 286  | 8    | 19   | 13  | 9     | 17   | 12   |
| ENSP00000229277 | ENO2     | 434  | 16   | 18   | 14  | 21    | 28   | 14   |
| ENSP00000229319 | LDHB     | 334  | 11   | 8    | 6   | 15    | 5    | 11   |
| ENSP00000229340 | RAB35    | 201  | 5    | 8    | 4.5 | 7     | 9    | 5.5  |
| ENSP00000230461 | TMEM30A  | 361  | 1    | 2    | 1   | 1     | 1    | 0    |
| ENSP00000230588 | MEP1A    | 746  | 1    | 0    | 0   | 0     | 0    | 0    |
| ENSP00000232014 | BCL6     | 706  | 2    | 3    | 2   | 8     | 1    | 1    |
| ENSP00000232447 | FLNB     | 2561 | 1    | 1    | 0   | 1     | 0    | 0    |
| ENSP00000232564 | GNB4     | 340  | 20   | 18   | 18  | 15    | 11   | 7    |
| ENSP00000233114 | MDH1     | 334  | 5    | 4    | 4   | 4     | 2    | 2    |
| ENSP00000233710 | ACADL    | 430  | 1    | 0    | 1   | 0     | 0    | 0    |
| ENSP00000234590 | ENO1     | 434  | 21   | 31   | 20  | 17.5  | 32.5 | 28.5 |
| ENSP00000234981 | GSTM1    | 181  | 1    | 5    | 4   | 5     | 4    | 2    |
| ENSP00000235835 | AKR7A2   | 359  | 1    | 1    | 0   | 1     | 0    | 0    |
| ENSP00000236877 | SLC8A2   | 921  | 4    | 4    | 2   | 2     | 0.5  | 0    |
| ENSP00000236959 | ATIC     | 592  | 2    | 1    | 2   | 2     | 0    | 2    |
| ENSP00000238081 | YWHAQ    | 245  | 18.5 | 30.5 | 26  | 28.5  | 23   | 18   |
| ENSP00000240327 | SPOP     | 374  | 1    | 6    | 5   | 2     | 6    | 11   |
| ENSP00000241001 | PAX6     | 422  | 1    | 0    | 0   | 0     | 0    | 0    |
| ENSP00000241337 | GSTM2    | 218  | 2    | 1    | 1   | 2     | 1    | 0    |
| ENSP00000241704 | COPA     | 1224 | 1    | 1    | 0   | 3     | 5    | 1    |
| ENSP00000242338 | CNTFR    | 372  | 1    | 0    | 1   | 1     | 1    | 0    |
| ENSP00000243052 | PDE1B    | 536  | 1    | 0    | 0   | 0     | 0    | 0    |
| ENSP00000243077 | LRP1     | 4544 | 7.5  | 4    | 3   | 3     | 0    | 2    |
| ENSP00000243706 | HAUS3    | 603  | 1    | 0    | 0   | 0     | 0    | 0    |
| ENSP00000243964 | SLC12A5  | 1116 | 16   | 13   | 18  | 12    | 10   | 9    |
| ENSP00000244295 | PSG4     | 326  | 1    | 0    | 0   | 0     | 0    | 0    |
| ENSP00000244314 | IRGC     | 463  | 2    | 5    | 3   | 2     | 4    | 2    |
| ENSP00000244458 | PACSLN1  | 444  | 1    | 4    | 2   | 1     | 2    | 0    |
| ENSP00000244534 | HIST1H1D | 221  | 2    | 0    | 0   | 2     | 0    | 1    |
| ENSP00000244751 | CPNE5    | 593  | 1    | 0    | 1   | 0     | 1    | 0    |
| ENSP00000245138 | CNOT1    | 1227 | 1    | 0    | 0   | 0     | 0    | 0    |
| ENSP00000245615 | MBOAT7   | 472  | 1    | 0    | 0   | 0     | 0    | 0    |
| ENSP00000246024 | TMX4     | 349  | 2    | 2    | 1   | 0     | 0    | 0    |

|                 |          |      |     |        |        |       |       |        |
|-----------------|----------|------|-----|--------|--------|-------|-------|--------|
| ENSP00000246069 | DSTN     | 165  | 1   | 7      | 0      | 3     | 5     | 4      |
| ENSP00000246662 | KRT9     | 623  | 4   | 124    | 90     | 3     | 28    | 19.5   |
| ENSP00000246957 | TRAP1    | 704  | 3.5 | 4.5    | 4.5    | 4     | 3     | 5      |
| ENSP00000247207 | HSPA2    | 639  | 3   | 8      | 3      | 2     | 5     | 4      |
| ENSP00000247271 | OMG      | 440  | 2   | 1      | 2      | 1     | 1     | 0      |
| ENSP00000247461 | CANX     | 592  | 58  | 34     | 39     | 53    | 43    | 29     |
| ENSP00000248121 | SYNGR3   | 229  | 2   | 3      | 3      | 1     | 1     | 1      |
| ENSP00000248437 | TUBA4A   | 448  | 184 | 331    | 231    | 173   | 278   | 212    |
| ENSP00000248975 | YWHAH    | 246  | 3   | 11     | 9      | 7     | 10    | 2      |
| ENSP00000249042 | TST      | 297  | 2   | 1      | 3      | 1     | 1     | 1      |
| ENSP00000249071 | RAC2     | 192  | 16  | 30.5   | 8      | 20    | 29    | 21     |
| ENSP00000249364 | CALU     | 315  | 1   | 0      | 0      | 1     | 0     | 0      |
| ENSP00000249700 | TMOD2    | 351  | 1   | 0      | 0      | 1     | 0     | 0      |
| ENSP00000250111 | ATP1B2   | 290  | 5   | 6      | 5      | 4     | 5     | 1      |
| ENSP00000250559 | RAP1B    | 184  | 3   | 4      | 1      | 3     | 6     | 3      |
| ENSP00000251195 | CLSPN    | 1332 | 1   | 0      | 0      | 0     | 0     | 0      |
| ENSP00000251287 | HCN2     | 889  | 1   | 0      | 0      | 0     | 0     | 0      |
| ENSP00000251453 | RPS16    | 146  | 1   | 6      | 0      | 2     | 2     | 1      |
| ENSP00000251535 | ALOX12   | 663  | 1   | 0      | 0      | 0     | 0     | 0      |
| ENSP00000251595 | HBA2     | 142  | 12  | 19     | 6      | 12    | 19    | 14     |
| ENSP00000252242 | KRT5     | 590  | 3   | 23     | 21     | 3     | 6     | 5      |
| ENSP00000252244 | KRT1     | 644  | 44  | 231.5  | 205    | 34.5  | 76    | 62     |
| ENSP00000252245 | KRT75    | 551  | 1   | 1.5    | 3      | 0     | 2     | 1      |
| ENSP00000252486 | APOE     | 317  | 4   | 0      | 0      | 2     | 0     | 1      |
| ENSP00000253413 | ATP6V1E1 | 226  | 9   | 21     | 17     | 12    | 16    | 7      |
| ENSP00000253792 | ACLY     | 1101 | 1   | 2      | 2      | 1     | 6     | 6      |
| ENSP00000253856 | ATP6V0A4 | 840  | 4   | 1      | 1      | 3     | 2     | 2      |
| ENSP00000254035 | CKMT2    | 419  | 2   | 3      | 2      | 2     | 1     | 0      |
| ENSP00000254488 | SLC6A11  | 632  | 1   | 0      | 1      | 1     | 0     | 0      |
| ENSP00000254675 | RAN      | 128  | 3   | 7      | 6      | 5     | 6     | 5      |
| ENSP00000254963 | HSPA12B  | 686  | 2   | 0      | 1      | 3.5   | 2     | 1      |
| ENSP00000254976 | SNAP25   | 206  | 8   | 41     | 30     | 11    | 22    | 15     |
| ENSP00000255283 | ATP8A2   | 1123 | 2   | 1      | 1      | 0     | 0     | 0      |
| ENSP00000255324 | RNF17    | 1623 | 1   | 0      | 0      | 0     | 0     | 0      |
| ENSP00000255448 | DCLK1    | 729  | 1   | 2      | 1      | 2     | 2     | 0      |
| ENSP00000255882 | PI4KA    | 2102 | 1   | 0      | 0      | 0     | 0     | 0      |
| ENSP00000256383 | EIF2S1   | 315  | 1   | 0      | 0      | 0     | 2     | 0      |
| ENSP00000256593 | GSTM5    | 218  | 1   | 1      | 1      | 2     | 1     | 1      |
| ENSP00000256594 | GSTM3    | 225  | 1   | 0      | 0      | 0     | 0     | 0      |
| ENSP00000256637 | SORT1    | 831  | 1   | 0      | 0      | 0     | 0     | 0      |
| ENSP00000256682 | ARF3     | 181  | 3   | 19     | 1      | 7     | 15    | 11     |
| ENSP00000256854 | NARS     | 548  | 1   | 4      | 0      | 0     | 1     | 0      |
| ENSP00000257430 | APC      | 2843 | 1   | 0      | 1      | 0     | 1     | 1      |
| ENSP00000257770 | NT5E     | 574  | 1   | 1      | 1      | 0     | 1     | 0      |
| ENSP00000258091 | CCT7     | 543  | 7   | 4      | 4      | 8     | 5     | 4      |
| ENSP00000258201 | FHOD1    | 1164 | 1   | 0      | 0      | 0     | 0     | 0      |
| ENSP00000258682 | CAMK2B   | 517  | 12  | 18     | 18     | 8     | 11    | 5      |
| ENSP00000258737 | RAC1     | 192  | 14  | 22     | 6      | 12    | 12    | 14     |
| ENSP00000258873 | ACSBG1   | 724  | 1   | 1      | 1      | 0     | 1     | 1      |
| ENSP00000259237 | BIN1     | 409  | 1   | 2      | 2      | 1     | 0     | 0      |
| ENSP00000259238 | BIN1     | 497  | 1   | 2      | 2      | 2     | 0     | 0      |
| ENSP00000259253 | UGGT1    | 1555 | 2   | 1      | 0      | 3     | 1     | 1      |
| ENSP00000259271 | GAD2     | 585  | 1   | 2      | 5      | 3     | 8     | 1      |
| ENSP00000259469 | RPL35    | 123  | 1   | 1      | 1      | 1     | 3     | 1      |
| ENSP00000259727 | GMPR     | 345  | 1   | 0      | 1      | 0     | 1     | 1      |
| ENSP00000259818 | TUBB2B   | 445  | 142 | 275.33 | 204.66 | 163.5 | 239.5 | 189.16 |
| ENSP00000259875 | DDR1     | 876  | 1   | 0      | 0      | 0     | 0     | 0      |
| ENSP00000259891 | MOG      | 295  | 1   | 1      | 1      | 1     | 2     | 0      |

|                 |         |      |       |        |        |      |       |       |
|-----------------|---------|------|-------|--------|--------|------|-------|-------|
| ENSP00000260570 | IFT172  | 1749 | 2     | 2      | 1      | 2    | 0     | 1     |
| ENSP00000260641 | ACTR2   | 394  | 3     | 4      | 7      | 6    | 7     | 4     |
| ENSP00000260985 | IDH1    | 414  | 2     | 3      | 1      | 2    | 3     | 1     |
| ENSP00000261023 | ITGAV   | 1048 | 1     | 1      | 0      | 0    | 0     | 0     |
| ENSP00000261160 | CNTN1   | 1007 | 48    | 40     | 10     | 37   | 44    | 37    |
| ENSP00000261173 | ATP2B1  | 1220 | 29    | 45     | 28     | 18   | 31    | 22    |
| ENSP00000261183 | OSBPL8  | 889  | 2     | 1      | 1      | 0    | 0     | 0     |
| ENSP00000261192 | BCAT1   | 386  | 1     | 1      | 0      | 1    | 0     | 0     |
| ENSP00000261205 | SYT1    | 422  | 71    | 126    | 109    | 71   | 137.5 | 88    |
| ENSP00000261313 | PEBP1   | 187  | 2     | 4      | 0      | 1    | 2     | 1     |
| ENSP00000261386 | GDE1    | 331  | 1     | 1      | 1      | 0    | 0     | 0     |
| ENSP00000261574 | IPO5    | 1115 | 1     | 0      | 0      | 0    | 0     | 2     |
| ENSP00000261733 | ALDH2   | 517  | 1     | 2      | 3      | 1    | 3     | 0     |
| ENSP00000261735 | ERP29   | 261  | 3     | 3      | 2      | 3    | 2     | 1     |
| ENSP00000261793 | CAMK2A  | 478  | 11    | 16     | 10     | 7    | 11    | 3     |
| ENSP00000261833 | CIT     | 2027 | 1     | 0      | 0      | 0    | 0     | 0     |
| ENSP00000261835 | CYP46A1 | 500  | 1     | 4      | 1      | 1    | 0     | 0     |
| ENSP00000261837 | GNB5    | 395  | 1     | 2      | 2      | 2    | 3     | 1     |
| ENSP00000261845 | MAPK6   | 721  | 1     | 2      | 1      | 0    | 1     | 1     |
| ENSP00000261875 | PTPLAD1 | 362  | 1     | 6      | 1      | 2    | 1     | 4     |
| ENSP00000261890 | RAB11A  | 216  | 5     | 14     | 12     | 4    | 12    | 5     |
| ENSP00000261917 | HCN4    | 1203 | 1     | 0      | 0      | 0    | 0     | 0     |
| ENSP00000261918 | SEMA7A  | 666  | 1     | 1      | 2      | 1    | 0     | 1     |
| ENSP00000261965 | TUBGCP3 | 907  | 0.5   | 0      | 0      | 0    | 0     | 0     |
| ENSP00000262030 | ATP5B   | 529  | 26    | 22     | 19     | 9    | 28    | 15    |
| ENSP00000262189 | KMT2C   | 4911 | 1     | 0      | 0      | 0    | 0     | 0     |
| ENSP00000262225 | TMED2   | 201  | 2     | 2      | 0      | 0    | 1     | 0     |
| ENSP00000262325 | AP2B1   | 937  | 26    | 20     | 16     | 28   | 26    | 22    |
| ENSP00000262384 | N4BP1   | 896  | 1     | 0      | 0      | 0    | 0     | 0     |
| ENSP00000262418 | SLC4A1  | 911  | 1     | 0      | 1      | 0    | 0     | 0     |
| ENSP00000262455 | ERP44   | 406  | 1     | 1      | 0      | 1    | 1     | 0     |
| ENSP00000262461 | SLC12A2 | 1212 | 1     | 0      | 0      | 0    | 0     | 0     |
| ENSP00000262493 | GNAO1   | 354  | 52    | 77.5   | 59     | 35   | 55    | 33    |
| ENSP00000262494 | GNAO1   | 354  | 24    | 24     | 20     | 15   | 21    | 13    |
| ENSP00000262584 | RPL8    | 257  | 1     | 1      | 0      | 0    | 0     | 2     |
| ENSP00000262623 | ATP4A   | 1035 | 18    | 33     | 31     | 18   | 29    | 23    |
| ENSP00000262646 | RAB2A   | 212  | 4     | 13     | 0      | 2    | 10    | 4     |
| ENSP00000262719 | PHLPP1  | 1717 | 1     | 0      | 0      | 0    | 0     | 0     |
| ENSP00000262746 | PRDX1   | 199  | 1     | 5      | 0      | 1    | 2     | 0     |
| ENSP00000263160 | SLC17A6 | 582  | 1     | 0      | 0      | 1    | 0     | 0     |
| ENSP00000263212 | PPM1F   | 454  | 1     | 0      | 0      | 1    | 0     | 0     |
| ENSP00000263233 | SYP     | 313  | 8     | 4      | 6.5    | 5    | 4     | 3     |
| ENSP00000263238 | ACTR3   | 418  | 1     | 2      | 1      | 0    | 0     | 2     |
| ENSP00000263273 | NUCB1   | 461  | 4     | 0      | 0      | 0    | 0     | 0     |
| ENSP00000263354 | NAPA    | 295  | 2     | 6      | 4      | 4    | 4     | 1     |
| ENSP00000263431 | PRKCG   | 697  | 2     | 2      | 3      | 1    | 1     | 3     |
| ENSP00000263519 | ATP2B3  | 1220 | 3     | 8      | 4      | 1    | 3     | 4     |
| ENSP00000263549 | PARP12  | 701  | 1     | 0      | 0      | 0    | 0     | 1     |
| ENSP00000263642 | IFIH1   | 1025 | 1     | 0      | 0      | 0    | 0     | 0     |
| ENSP00000264071 | TUBB4A  | 444  | 85.33 | 160.83 | 130.16 | 84.5 | 121.5 | 98.99 |
| ENSP00000264202 | CAPZB   | 277  | 1     | 3      | 4      | 1    | 0     | 3     |
| ENSP00000264235 | GSK3B   | 420  | 1     | 0      | 1      | 1    | 0     | 0     |
| ENSP00000264335 | YWHAE   | 255  | 4     | 6      | 5      | 8    | 4     | 7     |
| ENSP00000264366 | ANK2    | 3924 | 6     | 0      | 1      | 3    | 8     | 1     |
| ENSP00000264377 | ADAM23  | 832  | 2     | 1      | 2      | 1    | 0     | 0     |
| ENSP00000264441 | PCYOX1  | 293  | 2     | 3      | 3      | 3    | 1     | 1     |
| ENSP00000264449 | ATP8A1  | 1149 | 10    | 9      | 2      | 6    | 4     | 8     |
| ENSP00000264555 | PHRF1   | 1649 | 1     | 0      | 1      | 1    | 0     | 0     |



|                 |          |      |      |       |      |       |      |     |
|-----------------|----------|------|------|-------|------|-------|------|-----|
| ENSP00000264572 | RAP1GDS1 | 516  | 2    | 4     | 4    | 1     | 1    | 2   |
| ENSP00000264638 | CNTNAP1  | 1384 | 1    | 6     | 3    | 4     | 3    | 6   |
| ENSP00000264649 | ATP6V0A1 | 838  | 27   | 32    | 30   | 21    | 32   | 27  |
| ENSP00000264710 | RAB10    | 200  | 12   | 22    | 9    | 15    | 20   | 14  |
| ENSP00000264893 | SEPT11   | 429  | 4    | 5.5   | 11   | 3     | 5    | 3   |
| ENSP00000264908 | ANXA3    | 323  | 2    | 0     | 1    | 2     | 0    | 0   |
| ENSP00000264930 | SLC12A7  | 1083 | 1    | 1     | 2    | 0     | 1    | 1   |
| ENSP00000264932 | SDHA     | 664  | 1    | 0     | 0    | 0     | 0    | 0   |
| ENSP00000265062 | RAB7A    | 207  | 15   | 27    | 7    | 16    | 22   | 13  |
| ENSP00000265112 | TARS     | 723  | 1    | 0     | 0    | 0     | 0    | 0   |
| ENSP00000265113 | SLC1A3   | 542  | 1    | 3     | 2    | 1     | 0    | 0   |
| ENSP00000265175 | SEC24B   | 1268 | 0.5  | 0     | 0    | 0     | 0    | 0   |
| ENSP00000265333 | VDAC1    | 283  | 7    | 5     | 8.5  | 1     | 2    | 2   |
| ENSP00000265462 | PRDX5    | 214  | 1    | 4     | 0    | 2     | 1    | 1   |
| ENSP00000265717 | PRKAR2B  | 418  | 4    | 3     | 3    | 4     | 2    | 3   |
| ENSP00000265732 | RBM48    | 367  | 1    | 0     | 0    | 0     | 0    | 0   |
| ENSP00000265970 | PIK3C2A  | 1686 | 2    | 3     | 1    | 2     | 3    | 1   |
| ENSP00000266027 | GNAI2    | 339  | 8    | 10    | 3    | 5     | 5    | 3   |
| ENSP00000266039 | CACNA2D2 | 1145 | 1    | 3     | 0    | 5     | 2    | 2   |
| ENSP00000266481 | DNM1L    | 699  | 3    | 8     | 3    | 1     | 7    | 5   |
| ENSP00000266991 | DHH      | 396  | 1    | 0     | 0    | 0     | 0    | 0   |
| ENSP00000267484 | RTN1     | 776  | 12   | 14    | 7    | 9     | 6    | 2   |
| ENSP00000267502 | RDH12    | 316  | 1    | 0     | 1    | 0     | 0    | 0   |
| ENSP00000267512 | RAB15    | 208  | 4    | 6.5   | 6.17 | 6     | 8.66 | 3.5 |
| ENSP00000268251 | ABAT     | 500  | 9    | 6     | 8    | 14    | 8    | 6   |
| ENSP00000268613 | CDH13    | 760  | 3    | 2     | 3    | 1     | 2    | 2   |
| ENSP00000268835 | PRPSAP2  | 369  | 1    | 0     | 0    | 0     | 0    | 1   |
| ENSP00000269122 | CLTC     | 1675 | 132  | 170.5 | 144  | 150.5 | 161  | 177 |
| ENSP00000269349 | EIF4A3   | 411  | 1    | 2     | 4    | 4     | 2    | 2   |
| ENSP00000269576 | KRT10    | 584  | 22.5 | 99    | 97.5 | 18    | 24   | 22  |
| ENSP00000269848 | PFKL     | 780  | 4    | 7     | 5    | 6     | 9    | 9   |
| ENSP00000269881 | CALR3    | 384  | 3    | 0     | 0    | 2     | 0    | 2   |
| ENSP00000270776 | PGD      | 483  | 1    | 1     | 3    | 3     | 2    | 0   |
| ENSP00000272065 | ACP1     | 158  | 1    | 2     | 0    | 0     | 1    | 0   |
| ENSP00000272067 | ACP1     | 158  | 1    | 1     | 0    | 0     | 1    | 0   |
| ENSP00000272227 | PDIA6    | 440  | 4    | 1     | 0    | 3     | 1    | 1   |
| ENSP00000272233 | RHOB     | 196  | 2    | 5     | 0    | 0     | 0    | 0   |
| ENSP00000272424 | TPRKB    | 175  | 1    | 0     | 0    | 0     | 0    | 0   |
| ENSP00000272519 | RALB     | 206  | 1    | 1     | 1    | 0     | 1    | 2   |
| ENSP00000272716 | SLC4A10  | 1106 | 4    | 6     | 5    | 4     | 2    | 3   |
| ENSP00000273047 | RAB5A    | 215  | 7    | 11.5  | 10.5 | 5     | 11   | 4   |
| ENSP00000273258 | ARL6IP5  | 188  | 3    | 1     | 0    | 1     | 1    | 0   |
| ENSP00000273398 | ATP6V1A  | 617  | 27   | 38    | 39   | 32    | 54   | 36  |
| ENSP00000273512 | NCEH1    | 440  | 1    | 2     | 1    | 0     | 0    | 1   |
| ENSP00000274695 | CDKAL1   | 579  | 1    | 0     | 0    | 0     | 0    | 0   |
| ENSP00000274938 | SCUBE3   | 993  | 2    | 3     | 1    | 0     | 1    | 0   |
| ENSP00000275364 | GNA12    | 381  | 9.5  | 8.5   | 5.5  | 7.5   | 7    | 4.5 |
| ENSP00000275603 | CCT6A    | 531  | 3    | 2     | 4    | 4     | 3    | 2   |
| ENSP00000276390 | ATP6V1B2 | 511  | 13   | 18    | 17   | 14    | 26   | 17  |
| ENSP00000276651 | DPYS     | 519  | 5    | 0     | 2    | 5     | 2    | 2   |
| ENSP00000277853 | CAMK2G   | 495  | 1    | 2     | 1    | 1     | 0    | 0   |
| ENSP00000277865 | GLUD1    | 558  | 3    | 11    | 6    | 6     | 9    | 5   |
| ENSP00000278193 | LIN7C    | 197  | 1    | 0     | 0    | 0     | 0    | 0   |
| ENSP00000278379 | SLC1A2   | 574  | 13   | 16    | 12   | 11    | 7    | 6   |
| ENSP00000278422 | TMX2     | 296  | 2    | 2     | 0    | 2     | 0    | 0   |
| ENSP00000278572 | RPS3     | 259  | 2    | 7     | 4    | 3     | 2    | 1   |
| ENSP00000278886 | NINL     | 1382 | 1    | 0     | 0    | 1     | 0    | 0   |
| ENSP00000280187 | GPM6A    | 278  | 10   | 17    | 13   | 6     | 16   | 4   |

|                 |              |      |    |      |     |     |    |     |
|-----------------|--------------|------|----|------|-----|-----|----|-----|
| ENSP00000280326 | CCT5         | 541  | 2  | 1    | 0   | 0   | 3  | 2   |
| ENSP00000280571 | RILPL2       | 211  | 1  | 0    | 0   | 0   | 0  | 1   |
| ENSP00000280706 | LDHAL6A      | 332  | 3  | 5    | 2   | 3   | 2  | 1   |
| ENSP00000281127 | NRXN3        | 432  | 2  | 1    | 0   | 0   | 1  | 2   |
| ENSP00000281154 | SLC25A31     | 315  | 7  | 6    | 2   | 1   | 0  | 0   |
| ENSP00000281456 | SLC25A4      | 298  | 2  | 3    | 0   | 0   | 0  | 0   |
| ENSP00000281543 | GUF1         | 669  | 1  | 0    | 0   | 1   | 0  | 0.5 |
| ENSP00000281924 | TMEM163      | 289  | 1  | 0    | 0   | 0   | 0  | 0   |
| ENSP00000282050 | ATP5A1       | 553  | 4  | 11   | 15  | 2   | 5  | 5   |
| ENSP00000282382 | TMED7-TICAM2 | 404  | 2  | 2    | 3   | 1   | 2  | 1   |
| ENSP00000282493 | PDZD2        | 2839 | 2  | 1    | 2   | 3   | 1  | 0   |
| ENSP00000282878 | RAB3C        | 227  | 7  | 8    | 6.5 | 3.5 | 9  | 9   |
| ENSP00000283179 | HNRNPU       | 825  | 1  | 2    | 0   | 0   | 2  | 0   |
| ENSP00000283269 | CADPS        | 1314 | 6  | 12   | 6   | 18  | 6  | 12  |
| ENSP00000283351 | TRAPPC8      | 1435 | 1  | 0    | 0   | 0   | 0  | 0   |
| ENSP00000284440 | UCHL1        | 223  | 1  | 4    | 2   | 0   | 2  | 2   |
| ENSP00000284548 | OBSCN        | 6620 | 3  | 2    | 1   | 2   | 2  | 0   |
| ENSP00000284719 | OLA1         | 396  | 3  | 5    | 1   | 4   | 2  | 1   |
| ENSP00000284894 | NCAM2        | 695  | 2  | 0    | 0   | 1   | 1  | 0   |
| ENSP00000285208 | RAB6B        | 208  | 3  | 12   | 3   | 4   | 8  | 3   |
| ENSP00000285379 | CA2          | 260  | 1  | 0    | 0   | 1   | 0  | 0   |
| ENSP00000285930 | AKR1B1       | 316  | 1  | 1    | 1   | 1   | 1  | 1   |
| ENSP00000286091 | PDIA4        | 645  | 1  | 0    | 0   | 0   | 0  | 0   |
| ENSP00000286452 | KIF5A        | 943  | 2  | 1    | 0   | 3   | 2  | 2   |
| ENSP00000286548 | GNAQ         | 359  | 2  | 4    | 3   | 0   | 2  | 0   |
| ENSP00000286788 | CCT8         | 548  | 2  | 0    | 1   | 3   | 5  | 3   |
| ENSP00000287008 | PCDH1        | 1237 | 1  | 0    | 0   | 0   | 0  | 0   |
| ENSP00000287022 | UQCRB        | 111  | 1  | 0    | 0   | 0   | 0  | 0   |
| ENSP00000287226 | NPTN         | 338  | 5  | 9    | 9   | 6   | 6  | 3   |
| ENSP00000288319 | ERG          | 479  | 1  | 0    | 1   | 0   | 0  | 0   |
| ENSP00000288699 | DPYSL5       | 564  | 3  | 3    | 2   | 4   | 9  | 1   |
| ENSP00000289228 | ACTR1B       | 376  | 1  | 1    | 0   | 4   | 3  | 3   |
| ENSP00000289361 | BTN3A1       | 513  | 1  | 0    | 0   | 0   | 0  | 0   |
| ENSP00000289495 | PPP1R9A      | 1296 | 1  | 0    | 0   | 0   | 0  | 0   |
| ENSP00000290101 | RAP1GAP      | 727  | 1  | 2    | 1   | 0   | 1  | 0   |
| ENSP00000290158 | KPNB1        | 876  | 5  | 3    | 4   | 9   | 8  | 5   |
| ENSP00000290216 | SCRN2        | 425  | 1  | 0    | 0   | 0   | 0  | 0   |
| ENSP00000290271 | STC1         | 247  | 1  | 0    | 0   | 0   | 0  | 0   |
| ENSP00000290378 | ACTC1        | 377  | 17 | 30   | 25  | 16  | 26 | 14  |
| ENSP00000290949 | ATP6V0D1     | 351  | 17 | 12.5 | 7   | 17  | 8  | 1   |
| ENSP00000291107 | ABR          | 822  | 1  | 2    | 1   | 0   | 3  | 1   |
| ENSP00000291236 | SEPT3        | 286  | 1  | 2    | 3   | 2   | 2  | 0   |
| ENSP00000292385 | DBN1         | 651  | 1  | 3    | 2   | 0   | 1  | 1   |
| ENSP00000292807 | AP2M1        | 435  | 5  | 5    | 4   | 8   | 8  | 9   |
| ENSP00000292896 | HBE1         | 147  | 43 | 49   | 40  | 48  | 55 | 43  |
| ENSP00000292901 | HBD          | 141  | 13 | 27   | 16  | 19  | 21 | 12  |
| ENSP00000293349 | PLEKHH3      | 790  | 1  | 0    | 0   | 0   | 0  | 0   |
| ENSP00000293590 | FMNL3        | 1028 | 3  | 5    | 6   | 4   | 8  | 4   |
| ENSP00000293748 | SYNGAP1      | 1299 | 1  | 0    | 0   | 0   | 0  | 0   |
| ENSP00000293831 | EIF4A1       | 406  | 3  | 4    | 3.5 | 1   | 6  | 2   |
| ENSP00000293842 | RPL26        | 145  | 1  | 2    | 0   | 3   | 0  | 0   |
| ENSP00000294016 | ADCY9        | 1353 | 1  | 0    | 0   | 0   | 1  | 0   |
| ENSP00000294623 | FUBP1        | 653  | 1  | 0    | 0   | 0   | 1  | 0   |
| ENSP00000294724 | AGL          | 1532 | 1  | 0    | 0   | 1   | 0  | 0   |
| ENSP00000294742 | ARPC5        | 154  | 1  | 1    | 0   | 1   | 0  | 0   |
| ENSP00000295101 | KCNJ3        | 501  | 1  | 0    | 0   | 0   | 0  | 0   |
| ENSP00000295156 | VSNL1        | 191  | 7  | 12   | 1   | 8   | 7  | 6   |
| ENSP00000295266 | PDHA2        | 388  | 1  | 2    | 2   | 0   | 1  | 0   |

|                 |          |      |      |     |      |      |       |      |
|-----------------|----------|------|------|-----|------|------|-------|------|
| ENSP00000295598 | ATP1A1   | 1023 | 101  | 132 | 90   | 87   | 93    | 71.5 |
| ENSP00000295685 | ARPC2    | 300  | 2    | 5   | 6    | 3    | 4     | 2    |
| ENSP00000295688 | CCT3     | 545  | 5    | 7   | 6    | 5    | 12    | 3    |
| ENSP00000295901 | PSMD6    | 389  | 2    | 0   | 0    | 1    | 0     | 0    |
| ENSP00000295987 | SYN1     | 705  | 29   | 74  | 46   | 26   | 62    | 34   |
| ENSP00000295989 | CAND2    | 1119 | 1    | 0   | 0    | 0    | 0     | 1    |
| ENSP00000296121 | KIAA1143 | 154  | 1    | 0   | 0    | 0    | 0     | 0    |
| ENSP00000296122 | PPP1CB   | 327  | 3    | 3   | 3    | 1    | 4     | 1    |
| ENSP00000296402 | CAMK2D   | 478  | 11   | 15  | 16   | 8    | 10    | 5    |
| ENSP00000296425 | PGRMC2   | 223  | 1    | 2   | 0    | 0    | 1     | 1    |
| ENSP00000296435 | CAMP     | 173  | 1    | 0   | 0    | 0    | 0     | 0    |
| ENSP00000296464 | HSPA4L   | 839  | 1    | 1   | 4    | 0    | 7     | 3    |
| ENSP00000296471 | CAMKV    | 473  | 3    | 5   | 4    | 2    | 4     | 3    |
| ENSP00000296479 | GRM2     | 435  | 1    | 0   | 0    | 1    | 1     | 0    |
| ENSP00000296511 | ANXA5    | 320  | 7    | 3   | 3    | 3    | 0     | 1    |
| ENSP00000296741 | ENPP6    | 440  | 3    | 2   | 2    | 5    | 1     | 1    |
| ENSP00000296755 | MAP1B    | 2468 | 8    | 4   | 5    | 9    | 9     | 10   |
| ENSP00000296869 | ACSL6    | 722  | 1    | 3   | 3    | 0    | 5     | 0    |
| ENSP00000297185 | HSPA9    | 679  | 4    | 6   | 7    | 5    | 12    | 4    |
| ENSP00000297268 | COL1A2   | 1366 | 2    | 1   | 0    | 0    | 0     | 0    |
| ENSP00000297283 | PGAM2    | 253  | 10   | 14  | 14   | 8    | 10    | 7    |
| ENSP00000298049 | EEF1A2   | 463  | 8    | 12  | 13   | 19.5 | 10    | 11   |
| ENSP00000298159 | CFL2     | 166  | 2    | 9.5 | 1    | 3    | 6     | 8    |
| ENSP00000298468 | VDAC2    | 282  | 2    | 2   | 0    | 0    | 0     | 0    |
| ENSP00000298556 | HPRT1    | 218  | 1    | 3   | 3    | 1    | 3     | 0    |
| ENSP00000298649 | HK1      | 916  | 9    | 5   | 9    | 12   | 15    | 10   |
| ENSP00000299138 | VPS35    | 796  | 8    | 9   | 8    | 9    | 15    | 9    |
| ENSP00000299198 | CKB      | 381  | 31   | 29  | 27   | 39   | 45    | 33   |
| ENSP00000299300 | CCT2     | 535  | 5    | 5   | 7    | 5    | 8     | 4    |
| ENSP00000299518 | IDH3A    | 366  | 19   | 11  | 9    | 15   | 9     | 8    |
| ENSP00000299767 | HSP90B1  | 803  | 32   | 16  | 18   | 31   | 23    | 13   |
| ENSP00000300026 | PPIB     | 216  | 4    | 7   | 1    | 3    | 3     | 0    |
| ENSP00000300060 | ANPEP    | 967  | 6    | 6   | 1    | 0    | 2     | 3    |
| ENSP00000300161 | YWHAB    | 246  | 10   | 23  | 17   | 12   | 24    | 9    |
| ENSP00000300231 | MAP1A    | 2803 | 1    | 2   | 3    | 1    | 2     | 0    |
| ENSP00000300249 | MAPRE2   | 327  | 2    | 2   | 2    | 5    | 1     | 0    |
| ENSP00000300283 | CKMT1B   | 417  | 3    | 3   | 2    | 2    | 6     | 4    |
| ENSP00000300289 | PDIA3    | 505  | 17   | 13  | 15   | 16   | 11    | 15   |
| ENSP00000300737 | STIM1    | 685  | 1    | 0   | 0    | 0    | 0     | 0    |
| ENSP00000300935 | RAB8A    | 207  | 1    | 1   | 0    | 1    | 1     | 1    |
| ENSP00000301037 | SGK494   | 410  | 1    | 0   | 0    | 0    | 0     | 0    |
| ENSP00000301071 | TUBA1A   | 451  | 78   | 134 | 92   | 88   | 127.5 | 99   |
| ENSP00000301149 | GPD1     | 349  | 1    | 1   | 2    | 1    | 1     | 2    |
| ENSP00000301387 | ATP2A3   | 1043 | 9    | 12  | 12   | 5    | 12    | 9    |
| ENSP00000302088 | RER1     | 177  | 1    | 2   | 1    | 0    | 0     | 0    |
| ENSP00000302393 | LDHAL6B  | 381  | 1    | 1   | 0    | 1.5  | 1     | 1.5  |
| ENSP00000302397 | ATP1A3   | 1013 | 117  | 120 | 81   | 90.5 | 95.5  | 93.5 |
| ENSP00000302486 | MAP2K1   | 393  | 3    | 6   | 7    | 6    | 5     | 3    |
| ENSP00000302777 | TUBB3    | 378  | 36.5 | 100 | 82   | 38   | 70    | 65   |
| ENSP00000302886 | PA2G4    | 394  | 1    | 0   | 2    | 0    | 1     | 1    |
| ENSP00000302961 | HSPA4    | 840  | 5    | 11  | 6    | 12   | 23.5  | 7    |
| ENSP00000303145 | TMED10   | 219  | 1    | 2   | 0    | 0    | 2     | 2    |
| ENSP00000303909 | ABR      | 859  | 1    | 2   | 1    | 0    | 3     | 1    |
| ENSP00000304283 | RAC3     | 192  | 1    | 3   | 0    | 3    | 2     | 7    |
| ENSP00000304410 | C2orf68  | 166  | 1    | 0   | 0    | 0    | 0     | 0    |
| ENSP00000305152 | PLP1     | 277  | 54   | 97  | 57.5 | 69   | 79    | 56   |
| ENSP00000305263 | KRT28    | 464  | 2    | 6   | 4    | 1    | 0     | 0    |
| ENSP00000305355 | PRKCB    | 673  | 4    | 0   | 2    | 2    | 4     | 6    |

|                 |               |      |       |       |       |      |      |       |
|-----------------|---------------|------|-------|-------|-------|------|------|-------|
| ENSP00000305449 | CNNM3         | 707  | 1     | 0     | 0     | 0    | 0    | 0     |
| ENSP00000305938 | NEGR1         | 226  | 3     | 0     | 1     | 1    | 1    | 0     |
| ENSP00000305995 | PGK2          | 417  | 20    | 13    | 19    | 20   | 20   | 13    |
| ENSP00000306124 | PRKCE         | 737  | 1     | 0     | 0     | 0    | 1    | 0     |
| ENSP00000306253 | ITPR1         | 2743 | 5     | 5     | 2     | 5    | 1    | 4     |
| ENSP00000306306 | TGFBI         | 683  | 2     | 1     | 2     | 0    | 0    | 0     |
| ENSP00000306330 | YWHAG         | 247  | 25    | 31    | 29    | 28   | 23   | 16    |
| ENSP00000306496 | RAB33B        | 229  | 2.5   | 4     | 2.67  | 6.5  | 7.16 | 3     |
| ENSP00000306822 | AVEN          | 362  | 1     | 0     | 0     | 0    | 0    | 0     |
| ENSP00000307241 | PDHB          | 359  | 5     | 6     | 5     | 3    | 0    | 0     |
| ENSP00000307334 | AUH           | 310  | 2     | 3     | 6     | 0    | 3    | 0     |
| ENSP00000307341 | SNAP25        | 206  | 13    | 38    | 31    | 13   | 24   | 13    |
| ENSP00000307900 | GLUL          | 373  | 9     | 6     | 3     | 9    | 8    | 3     |
| ENSP00000307940 | EEF2          | 858  | 2     | 6.5   | 6     | 11   | 15   | 11.5  |
| ENSP00000308495 | KRAS          | 188  | 1     | 1     | 0     | 0    | 1    | 1     |
| ENSP00000309066 | DPP10         | 789  | 1     | 0     | 1     | 0    | 1    | 0     |
| ENSP00000309431 | RP11-683L23.1 | 444  | 3     | 18    | 15    | 5    | 10   | 12    |
| ENSP00000309438 | PFKM          | 780  | 5.5   | 9     | 6     | 8.5  | 19   | 10    |
| ENSP00000309477 | ACO1          | 889  | 4     | 2     | 1     | 3    | 3    | 1     |
| ENSP00000309503 | YWHAZ         | 245  | 7     | 7     | 6     | 13   | 10   | 5     |
| ENSP00000309539 | DPYSL2        | 572  | 63    | 92    | 75    | 71   | 133  | 98    |
| ENSP00000309629 | CFL1          | 166  | 1     | 3     | 0     | 3    | 2    | 3     |
| ENSP00000310040 | EIF3F         | 357  | 1     | 1     | 0     | 0    | 1    | 0     |
| ENSP00000310129 | PSMD2         | 908  | 1     | 0     | 2     | 1    | 3    | 2     |
| ENSP00000310219 | HSPA6         | 643  | 3     | 5     | 8     | 3.5  | 5.5  | 1     |
| ENSP00000310226 | RAB1B         | 201  | 4     | 9     | 1     | 5    | 10   | 11    |
| ENSP00000310587 | NCALD         | 193  | 2     | 7     | 0     | 2    | 1    | 0     |
| ENSP00000310829 | TTC18         | 1121 | 1     | 0     | 0     | 0    | 0    | 0     |
| ENSP00000310861 | KRT2          | 639  | 12    | 54    | 48    | 17   | 8    | 11    |
| ENSP00000311028 | RPS14         | 151  | 1     | 3     | 0     | 0    | 1    | 1     |
| ENSP00000311186 | ATP2A2        | 997  | 40.5  | 71    | 52    | 38   | 56   | 49    |
| ENSP00000311344 | PPP2R1B       | 667  | 1     | 2     | 1     | 1    | 2    | 1     |
| ENSP00000311489 | SPTBN2        | 2390 | 3     | 4     | 1     | 5    | 6    | 10    |
| ENSP00000313050 | GBAS          | 286  | 1     | 3     | 4     | 0    | 1    | 0     |
| ENSP00000313129 | TARDBP        | 295  | 2     | 1     | 2     | 0    | 0    | 0     |
| ENSP00000313164 | DNM2          | 870  | 10    | 7     | 7     | 9    | 17   | 7     |
| ENSP00000313567 | CYFIP2        | 1253 | 7     | 22    | 6     | 12   | 20   | 16    |
| ENSP00000314458 | CDC42         | 191  | 2     | 6     | 3     | 1    | 7    | 2     |
| ENSP00000314649 | ALDH5A1       | 548  | 1     | 1     | 2     | 0    | 2    | 2     |
| ENSP00000314831 | KCTD1         | 257  | 1     | 0     | 1     | 1    | 2    | 0     |
| ENSP00000315662 | IQSEC3        | 1182 | 1     | 0     | 0     | 0    | 0    | 0     |
| ENSP00000315931 | AHCYL2        | 611  | 4     | 6     | 5     | 3    | 4    | 0     |
| ENSP00000316291 | RBBP6         | 1758 | 1     | 1     | 0     | 0    | 0    | 0     |
| ENSP00000316357 | USP9X         | 2570 | 4     | 4     | 2     | 2    | 4    | 5     |
| ENSP00000316664 | IGSF8         | 613  | 1     | 0     | 0     | 0    | 1    | 1     |
| ENSP00000316861 | GPM6B         | 328  | 4     | 11    | 13    | 2    | 6    | 6     |
| ENSP00000317334 | TCP1          | 556  | 2     | 2     | 3     | 0    | 5    | 2     |
| ENSP00000317379 | GLS           | 669  | 1     | 7     | 3     | 0    | 4    | 3     |
| ENSP00000317788 | HNRNPK        | 463  | 1     | 1     | 1     | 3    | 5    | 1     |
| ENSP00000318472 | NCAM1         | 848  | 20    | 24    | 14    | 13   | 15   | 16    |
| ENSP00000318575 | TUBA8         | 383  | 16    | 17    | 12    | 18   | 14   | 10    |
| ENSP00000318687 | HSPH1         | 858  | 1     | 0     | 1     | 6    | 7    | 1     |
| ENSP00000318697 | TUBB6         | 446  | 16.83 | 27.83 | 26.16 | 14.5 | 26   | 22.49 |
| ENSP00000318845 | SYNGR1        | 191  | 4     | 9     | 11    | 3    | 8    | 3     |
| ENSP00000319281 | BASP1         | 227  | 7     | 6     | 6     | 3    | 5    | 0     |
| ENSP00000319361 | AP1B1         | 919  | 2     | 0     | 0     | 6    | 0    | 0     |
| ENSP00000319578 | DDX47         | 406  | 2     | 2     | 1     | 2    | 3    | 0     |
| ENSP00000319739 | RCN2          | 335  | 1     | 0     | 0     | 2    | 0    | 0     |

|                 |          |      |     |     |      |      |     |     |
|-----------------|----------|------|-----|-----|------|------|-----|-----|
| ENSP00000320017 | PHYHIP   | 330  | 2   | 3.5 | 3    | 1    | 2   | 2   |
| ENSP00000320171 | PKM      | 531  | 43  | 43  | 35   | 42   | 81  | 57  |
| ENSP00000320291 | OSBPL1A  | 950  | 1   | 1   | 0    | 1    | 1   | 0   |
| ENSP00000320295 | TUBB3    | 450  | 5   | 11  | 10   | 6    | 13  | 9   |
| ENSP00000320324 | NPEPPS   | 919  | 2   | 0   | 0    | 2    | 2   | 2   |
| ENSP00000320516 | EHD1     | 534  | 2   | 4   | 3    | 3    | 4   | 1   |
| ENSP00000320580 | PPP3CA   | 469  | 4   | 5   | 8    | 7    | 4   | 0   |
| ENSP00000320866 | CALR     | 417  | 17  | 8   | 7    | 17   | 5   | 5   |
| ENSP00000321320 | FAM203A  | 390  | 1   | 0   | 0    | 0    | 0   | 0   |
| ENSP00000321343 | ST8SIA5  | 376  | 1   | 0   | 0    | 0    | 0   | 0   |
| ENSP00000321606 | CRMP1    | 686  | 8   | 9   | 7    | 5    | 21  | 9   |
| ENSP00000321617 | ANKZF1   | 726  | 1   | 0   | 0    | 0    | 0   | 0   |
| ENSP00000321703 | TACC1    | 805  | 1   | 0   | 1    | 0    | 0   | 0   |
| ENSP00000321753 | C7orf63  | 895  | 1   | 0   | 0    | 0    | 0   | 0   |
| ENSP00000322147 | RTN4     | 373  | 3   | 4   | 0    | 2    | 0   | 0   |
| ENSP00000322234 | SYNJ1    | 1573 | 14  | 22  | 2    | 15   | 28  | 21  |
| ENSP00000322421 | HBA1     | 142  | 12  | 19  | 7    | 13   | 18  | 15  |
| ENSP00000322832 | ROGDI    | 287  | 1   | 1   | 1    | 1    | 0   | 1   |
| ENSP00000323032 | ZNF318   | 1117 | 1   | 0   | 0    | 0    | 0   | 0   |
| ENSP00000323339 | C2CD3    | 1963 | 1   | 0   | 0    | 0    | 0   | 0   |
| ENSP00000323856 | PLEC     | 4684 | 1   | 0   | 0    | 1    | 0   | 0   |
| ENSP00000324011 | XPNPEP1  | 642  | 2   | 2   | 4    | 2    | 4   | 1   |
| ENSP00000324105 | ENO3     | 434  | 2   | 11  | 7    | 9    | 11  | 7   |
| ENSP00000324172 | ATP2B2   | 1243 | 12  | 13  | 12   | 9    | 15  | 9   |
| ENSP00000324173 | HSPA5    | 654  | 39  | 27  | 26   | 24   | 28  | 7   |
| ENSP00000324287 | ACAP2    | 778  | 1   | 0   | 0    | 0    | 0   | 0   |
| ENSP00000324549 | CYFIP1   | 1253 | 0.5 | 0.5 | 0    | 2    | 1.5 | 1   |
| ENSP00000324628 | NAPG     | 312  | 5   | 2   | 3    | 2    | 0   | 0   |
| ENSP00000324804 | PPP2R1A  | 589  | 11  | 12  | 12   | 16   | 15  | 8   |
| ENSP00000325002 | COPG1    | 874  | 1   | 0   | 1    | 0    | 1   | 0   |
| ENSP00000325074 | PPP2R2A  | 457  | 2   | 3   | 2    | 4    | 6   | 2   |
| ENSP00000325136 | HADHB    | 474  | 1   | 0   | 0    | 0    | 1   | 0   |
| ENSP00000325452 | KIF26A   | 1743 | 1   | 0   | 0    | 0    | 0   | 0   |
| ENSP00000325660 | CNTN1    | 1018 | 4   | 2   | 0    | 7    | 2   | 1   |
| ENSP00000325817 | CYFIP2   | 1278 | 1.5 | 1   | 0    | 3    | 1.5 | 1.5 |
| ENSP00000325836 | DIRAS1   | 198  | 1   | 0   | 0    | 0    | 0   | 0   |
| ENSP00000325875 | HSP90AB1 | 724  | 27  | 40  | 30.5 | 34.5 | 62  | 46  |
| ENSP00000326381 | EIF4A2   | 407  | 1   | 3   | 1.5  | 0    | 2   | 3   |
| ENSP00000326777 | MTHFSD   | 382  | 1   | 0   | 0    | 0    | 0   | 0   |
| ENSP00000327070 | MDH2     | 338  | 10  | 11  | 7    | 13   | 8   | 5   |
| ENSP00000327116 | EHD3     | 535  | 1   | 0   | 0    | 0    | 0   | 0   |
| ENSP00000327137 | ARPC2    | 300  | 2   | 5   | 5    | 2    | 3   | 2   |
| ENSP00000327145 | FLNC     | 2725 | 1   | 0   | 0    | 0    | 0   | 0   |
| ENSP00000327539 | HNRNPH1  | 472  | 1   | 4   | 5    | 1    | 4   | 1   |
| ENSP00000327589 | GLUD2    | 558  | 3   | 7   | 5    | 4    | 7   | 4   |
| ENSP00000327694 | AP2A2    | 940  | 13  | 18  | 13   | 12   | 32  | 13  |
| ENSP00000327801 | P4HB     | 508  | 2   | 0   | 0    | 3    | 1   | 0   |
| ENSP00000328226 | DPP6     | 803  | 7   | 1   | 1    | 0    | 3   | 0   |
| ENSP00000328336 | CEND1    | 149  | 1   | 0   | 0    | 0    | 0   | 0   |
| ENSP00000328455 | LSAMP    | 345  | 16  | 9   | 12   | 15   | 12  | 4   |
| ENSP00000329568 | NLRP7    | 1009 | 1   | 0   | 0    | 0    | 0   | 0   |
| ENSP00000330054 | EEF1A1   | 462  | 27  | 51  | 43   | 43   | 58  | 36  |
| ENSP00000330101 | KRT76    | 638  | 2   | 0   | 0    | 2    | 0   | 0   |
| ENSP00000330862 | OPCML    | 345  | 6   | 6   | 5    | 7    | 7   | 4   |
| ENSP00000331428 | CMTM1    | 122  | 1   | 0   | 0    | 0    | 0   | 0   |
| ENSP00000331514 | ACTG1    | 375  | 53  | 87  | 70   | 52.5 | 85  | 55  |
| ENSP00000331636 | CAPN12   | 719  | 1   | 0   | 0    | 1    | 0   | 0   |
| ENSP00000331901 | EEF1G    | 437  | 1   | 5   | 3    | 1    | 6   | 1   |

|                 |           |       |      |       |       |       |       |     |
|-----------------|-----------|-------|------|-------|-------|-------|-------|-----|
| ENSP00000332287 | SYNGR1    | 233   | 5    | 4     | 3     | 4     | 2     | 0   |
| ENSP00000332818 | SV2B      | 683   | 2    | 3     | 1     | 0     | 0     | 0   |
| ENSP00000333255 | VMA21     | 101   | 1    | 0     | 1     | 1     | 0     | 0   |
| ENSP00000333393 | ATL2      | 566   | 3    | 4     | 3     | 0     | 1     | 2   |
| ENSP00000333547 | RAB11B    | 218   | 5    | 15    | 13    | 4     | 12    | 6   |
| ENSP00000333994 | HBB       | 147   | 9    | 15    | 6     | 11    | 15    | 5   |
| ENSP00000334234 | SEPT10    | 321   | 1    | 0     | 1     | 0     | 1     | 0   |
| ENSP00000334379 | C2CD3     | 2353  | 1    | 0     | 0     | 0     | 0     | 0   |
| ENSP00000335153 | HSP90AA1  | 854   | 3    | 0     | 2     | 3     | 3     | 2   |
| ENSP00000335323 | ACACA     | 2268  | 2    | 0     | 1     | 0     | 0     | 0   |
| ENSP00000336604 | KRT13     | 420   | 1    | 5     | 6     | 1     | 2     | 1   |
| ENSP00000336744 | GSTM4     | 157   | 1    | 1     | 1     | 0     | 1     | 1   |
| ENSP00000336799 | TUBA1B    | 451   | 70   | 111   | 75    | 76    | 101.5 | 67  |
| ENSP00000336831 | PLS1      | 629   | 3    | 1     | 1     | 2     | 1     | 1   |
| ENSP00000336850 | RAB6A     | 208   | 7.5  | 17    | 10.83 | 6     | 11.5  | 6.5 |
| ENSP00000336861 | IQCH      | 1027  | 1    | 0     | 0     | 0     | 0     | 0   |
| ENSP00000336927 | ALDOA     | 364   | 5    | 11    | 11    | 8     | 15    | 11  |
| ENSP00000338082 | HBG2      | 147   | 3    | 0     | 2     | 5     | 2     | 2   |
| ENSP00000338349 | NRXN3     | 1061  | 3    | 1     | 1     | 2     | 2     | 1   |
| ENSP00000338413 | UBA1      | 1058  | 11   | 18    | 5     | 12    | 22    | 14  |
| ENSP00000338461 | CYB5R3    | 301   | 2    | 1     | 1     | 0     | 0     | 0   |
| ENSP00000338568 | ATP5C1    | 297   | 1    | 1     | 1     | 0     | 0     | 0   |
| ENSP00000338718 | ATXN2L    | 1075  | 1    | 0     | 0     | 1     | 0     | 0   |
| ENSP00000338934 | EZR       | 586   | 2    | 0     | 0     | 0     | 1     | 0   |
| ENSP00000338964 | GGT7      | 662   | 1    | 1     | 2     | 2     | 3     | 4   |
| ENSP00000339001 | TUBB      | 444   | 24   | 39    | 27    | 20    | 31.5  | 26  |
| ENSP00000339084 | AKR7A2    | 314   | 1    | 1     | 0     | 1     | 0     | 0   |
| ENSP00000339191 | CAV1      | 178   | 2    | 1     | 0     | 0     | 0     | 0   |
| ENSP00000339729 | FSCN1     | 472   | 15   | 10    | 14    | 12    | 10    | 11  |
| ENSP00000340019 | HSPD1     | 573   | 3    | 2     | 2     | 2     | 8     | 3   |
| ENSP00000340211 | CORO1B    | 489   | 1    | 1     | 0     | 0     | 1     | 0   |
| ENSP00000340454 | RAP1GDS1  | 608   | 4    | 4     | 5     | 3     | 2     | 3   |
| ENSP00000340466 | GANAB     | 966   | 12   | 5     | 3     | 16    | 5     | 4   |
| ENSP00000340554 | TTN       | 27118 | 2    | 4     | 3     | 2     | 3     | 2   |
| ENSP00000340610 | POTEH     | 545   | 1    | 0     | 0     | 1     | 0     | 0   |
| ENSP00000340716 | RTN1      | 208   | 15.5 | 24    | 8     | 9.5   | 10    | 3   |
| ENSP00000340766 | SMG7      | 1137  | 1    | 0     | 0     | 0     | 0     | 0   |
| ENSP00000340815 | SLC3A2    | 529   | 3    | 0     | 0     | 2     | 1     | 1   |
| ENSP00000340903 | RTN3      | 241   | 8.5  | 7     | 5     | 5.5   | 8     | 3   |
| ENSP00000340930 | ATP2B4    | 1170  | 3    | 1     | 0     | 2     | 1.5   | 1   |
| ENSP00000340989 | SFN       | 248   | 1.5  | 2.5   | 3     | 3.5   | 4     | 2   |
| ENSP00000341072 | CDC42     | 191   | 2    | 3     | 0     | 8     | 3     | 2   |
| ENSP00000341138 | EPB41L3   | 1087  | 20   | 15    | 12    | 18    | 25    | 13  |
| ENSP00000341214 | HIST1H1T  | 207   | 2    | 1     | 0     | 1     | 0     | 0   |
| ENSP00000341289 | TUBB4B    | 445   | 366  | 628.5 | 495.5 | 366.5 | 478   | 361 |
| ENSP00000341408 | ABHD12    | 398   | 1    | 2     | 3     | 0     | 1     | 0   |
| ENSP00000341524 | SEPT6     | 434   | 1    | 1     | 2     | 0     | 2     | 1   |
| ENSP00000341848 | GOLGB1    | 3259  | 2    | 0     | 0     | 0     | 0     | 0   |
| ENSP00000341885 | RPS2      | 293   | 2    | 2     | 3     | 1     | 0     | 0   |
| ENSP00000341917 | ENG       | 625   | 1    | 0     | 1     | 1     | 0     | 1   |
| ENSP00000341988 | SPATA31D1 | 1576  | 1    | 0     | 0     | 0     | 0     | 0   |
| ENSP00000342026 | PRDX6     | 224   | 1    | 4     | 3     | 1     | 3     | 1   |
| ENSP00000342056 | CS        | 466   | 5    | 10    | 8     | 7     | 7     | 3   |
| ENSP00000342128 | NFASC     | 1257  | 3    | 0     | 1     | 2     | 2     | 1   |
| ENSP00000342710 | KRT77     | 578   | 4    | 18    | 14    | 3.5   | 10    | 7   |
| ENSP00000342711 | LY6H      | 161   | 1    | 1     | 0     | 1     | 0     | 0   |
| ENSP00000342951 | ATP6V0A1  | 837   | 40   | 41    | 33    | 28    | 39    | 36  |
| ENSP00000342958 | NPTN      | 282   | 7    | 6     | 2     | 6     | 3     | 1   |

|                 |          |      |     |      |     |     |    |     |
|-----------------|----------|------|-----|------|-----|-----|----|-----|
| ENSP00000343027 | GNAI1    | 354  | 3   | 4    | 6   | 1   | 4  | 1   |
| ENSP00000343040 | HMGB1    | 215  | 1   | 0    | 2   | 0   | 1  | 0   |
| ENSP00000343158 | EPB41L3  | 1087 | 1   | 1    | 1   | 1   | 3  | 1   |
| ENSP00000343206 | SYN1     | 669  | 9   | 13   | 10  | 11  | 15 | 10  |
| ENSP00000343458 | BCAP31   | 246  | 2   | 3    | 3   | 1   | 2  | 0   |
| ENSP00000343463 | MAP3K2   | 619  | 1   | 1    | 1   | 0   | 0  | 0   |
| ENSP00000343599 | ATP2B1   | 1184 | 16  | 28   | 18  | 10  | 18 | 12  |
| ENSP00000343650 | TTC18    | 361  | 1   | 0    | 0   | 0   | 0  | 0   |
| ENSP00000343690 | DPYSL3   | 684  | 3   | 2    | 3   | 3   | 8  | 3   |
| ENSP00000343990 | TRIM14   | 442  | 1   | 0    | 0   | 0   | 0  | 0   |
| ENSP00000344002 | FLNC     | 2692 | 1   | 0    | 0   | 0   | 0  | 0   |
| ENSP00000344106 | RTN3     | 1013 | 9   | 17   | 12  | 10  | 10 | 9   |
| ENSP00000344403 | FSIP2    | 6996 | 1   | 0    | 0   | 0   | 0  | 0   |
| ENSP00000344677 | ATP2B2   | 1229 | 8   | 5.5  | 4   | 5   | 6  | 3   |
| ENSP00000344868 | SEPT7    | 436  | 9   | 20.5 | 19  | 13  | 16 | 9   |
| ENSP00000345461 | CACNB1   | 523  | 1   | 0    | 0   | 0   | 0  | 0   |
| ENSP00000345656 | VAPA     | 294  | 1   | 5    | 5   | 4   | 3  | 0   |
| ENSP00000345680 | DNM1     | 851  | 41  | 61   | 66  | 52  | 89 | 75  |
| ENSP00000346032 | ANXA2    | 357  | 6   | 10   | 6   | 5   | 8  | 3   |
| ENSP00000346067 | RPSA     | 295  | 3   | 5    | 5   | 4   | 2  | 3   |
| ENSP00000346240 | FBXO2    | 296  | 1   | 2    | 0   | 1   | 1  | 0   |
| ENSP00000346246 | AP2A1    | 955  | 4   | 5    | 4   | 2   | 7  | 6   |
| ENSP00000346328 | GNAS     | 395  | 2.5 | 3.5  | 4.5 | 3.5 | 2  | 1.5 |
| ENSP00000346522 | ATL1     | 553  | 10  | 9    | 8   | 15  | 8  | 10  |
| ENSP00000346545 | MBP      | 73   | 10  | 12   | 2   | 12  | 9  | 4   |
| ENSP00000346550 | ANXA6    | 673  | 5   | 1    | 3   | 7   | 5  | 4   |
| ENSP00000346809 | PGAP1    | 922  | 2   | 0    | 1   | 1   | 0  | 0   |
| ENSP00000347359 | ATP6V1H  | 465  | 8   | 7    | 11  | 11  | 8  | 7   |
| ENSP00000347457 | DNM3     | 869  | 2.5 | 2    | 6   | 5   | 6  | 2   |
| ENSP00000347665 | COL18A1  | 1519 | 1   | 0    | 0   | 0   | 0  | 0   |
| ENSP00000347744 | FAM49A   | 323  | 1   | 1    | 0   | 0   | 0  | 0   |
| ENSP00000347890 | DNM2     | 870  | 1   | 1    | 1   | 4   | 5  | 3   |
| ENSP00000348062 | PDHA1    | 203  | 6   | 7    | 6   | 4   | 5  | 2   |
| ENSP00000348273 | MBP      | 304  | 12  | 16   | 10  | 13  | 16 | 12  |
| ENSP00000348279 | RTN3     | 255  | 1   | 4    | 5   | 3   | 2  | 2   |
| ENSP00000348394 | NCDN     | 729  | 17  | 21   | 18  | 23  | 27 | 17  |
| ENSP00000348463 | TMEM236  | 351  | 1   | 0    | 0   | 1   | 0  | 0   |
| ENSP00000348546 | RAB1A    | 173  | 1   | 2    | 0   | 1   | 1  | 2   |
| ENSP00000348589 | CACNA2D1 | 1103 | 12  | 16   | 0   | 21  | 18 | 18  |
| ENSP00000348693 | MYO5A    | 1828 | 3   | 3    | 4   | 1   | 3  | 2   |
| ENSP00000348702 | PLEC     | 4533 | 1   | 0    | 0   | 1   | 0  | 0   |
| ENSP00000348965 | DYNC1H1  | 4646 | 59  | 84   | 53  | 85  | 98 | 77  |
| ENSP00000349053 | GANAB    | 944  | 5   | 0    | 1   | 5   | 2  | 2   |
| ENSP00000349168 | HNRNPH1  | 449  | 1   | 3    | 2   | 1   | 3  | 1   |
| ENSP00000349238 | CCDC88B  | 1476 | 9   | 3    | 4   | 8   | 5  | 6   |
| ENSP00000349320 | CACNA2D1 | 1091 | 2   | 5    | 0   | 4   | 5  | 6   |
| ENSP00000349534 | ATL1     | 558  | 1   | 4    | 3   | 6   | 1  | 2   |
| ENSP00000349588 | ANK2     | 3957 | 1   | 0    | 0   | 2   | 2  | 0   |
| ENSP00000349658 | XPNPEP3  | 507  | 1   | 0    | 0   | 0.5 | 2  | 1   |
| ENSP00000349748 | SFPQ     | 707  | 1   | 0    | 0   | 0   | 0  | 0   |
| ENSP00000349892 | MYCBP2   | 4640 | 1   | 0    | 0   | 0   | 0  | 0   |
| ENSP00000349903 | SYNJ1    | 1295 | 1   | 4    | 3   | 5   | 5  | 6   |
| ENSP00000350310 | ATP2B4   | 1205 | 1   | 4    | 1   | 2   | 2  | 1   |
| ENSP00000350364 | NEGR1    | 354  | 5   | 1    | 2   | 1   | 2  | 1   |
| ENSP00000350447 | SGOL2    | 1265 | 1   | 0    | 1   | 1   | 1  | 0   |
| ENSP00000350469 | AMER2    | 552  | 2   | 2    | 1   | 2   | 1  | 1   |
| ENSP00000350632 | CADPS    | 1274 | 2   | 3    | 4   | 9   | 4  | 10  |
| ENSP00000350876 | DNM3     | 863  | 3.5 | 1    | 3   | 5   | 1  | 2   |

|                 |          |      |      |      |      |      |      |      |
|-----------------|----------|------|------|------|------|------|------|------|
| ENSP00000350882 | SPTAN1   | 2477 | 2    | 1    | 0    | 6    | 4    | 6    |
| ENSP00000350974 | PPP1CA   | 286  | 4    | 8    | 7    | 1    | 6    | 1    |
| ENSP00000351155 | ATL1     | 558  | 11   | 11   | 9    | 15   | 10   | 9    |
| ENSP00000351483 | SLC4A8   | 1071 | 1    | 0    | 0    | 0    | 0    | 1    |
| ENSP00000351617 | IQCH     | 696  | 1    | 0    | 0    | 0    | 0    | 0    |
| ENSP00000351777 | VCP      | 806  | 3    | 3    | 2    | 8    | 6    | 8    |
| ENSP00000351926 | AP2A1    | 977  | 6    | 5    | 6    | 3    | 7    | 5    |
| ENSP00000352228 | PCBP2    | 331  | 4    | 4    | 3    | 4    | 3    | 1    |
| ENSP00000352398 | HK1      | 917  | 10   | 9    | 10   | 12   | 19   | 13   |
| ENSP00000352522 | ATP6V1H  | 483  | 2    | 1    | 2    | 3    | 2    | 1    |
| ENSP00000352842 | PFKM     | 780  | 3    | 0    | 1    | 5    | 3    | 1    |
| ENSP00000352918 | ARPC5    | 151  | 1    | 1    | 0    | 1    | 0    | 0    |
| ENSP00000353072 | ATP2A3   | 1052 | 2    | 0    | 1    | 0    | 1    | 1    |
| ENSP00000353151 | HOXA4    | 320  | 2    | 3    | 1    | 3    | 2    | 2    |
| ENSP00000353174 | RYR2     | 4973 | 11   | 15   | 8    | 10   | 13   | 7    |
| ENSP00000353433 | HK1      | 905  | 3    | 1    | 1    | 2    | 3    | 1    |
| ENSP00000353785 | TPPP     | 219  | 3    | 2    | 0    | 4    | 0    | 1    |
| ENSP00000353846 | DCLK1    | 740  | 1    | 2    | 1    | 2    | 2    | 0    |
| ENSP00000354111 | DNAJC5   | 198  | 16   | 20   | 12   | 12   | 12   | 6    |
| ENSP00000354357 | GSTM3    | 225  | 1    | 0    | 0    | 0    | 0    | 0    |
| ENSP00000354451 | IQGAP3   | 1631 | 8    | 6    | 4    | 5    | 6    | 4    |
| ENSP00000354468 | CYB5R3   | 334  | 2    | 1    | 1    | 0    | 0    | 0    |
| ENSP00000354490 | ATP1A2   | 1020 | 37.5 | 34.5 | 26   | 23.5 | 20.5 | 24.5 |
| ENSP00000354615 | ACOT7    | 370  | 1    | 3    | 4    | 2    | 2    | 4    |
| ENSP00000354635 | AGL      | 1515 | 1    | 0    | 0    | 1    | 0    | 0    |
| ENSP00000354644 | ARHGEF11 | 1522 | 3    | 1    | 1    | 1    | 0    | 0    |
| ENSP00000354712 | L1CAM    | 1248 | 1    | 0    | 0    | 0    | 2    | 0    |
| ENSP00000354777 | TBKBP1   | 615  | 1    | 0    | 0    | 0    | 0    | 0    |
| ENSP00000354778 | CNTNAP2  | 1331 | 2    | 1    | 1    | 0    | 1    | 0    |
| ENSP00000354791 | DCTN1    | 1278 | 2    | 1    | 1    | 0    | 5    | 4    |
| ENSP00000354947 | CAPZA2   | 286  | 1    | 2    | 2    | 1    | 2    | 1    |
| ENSP00000355146 | GPRASP1  | 1395 | 1    | 0    | 0    | 0    | 0    | 0    |
| ENSP00000355311 | OPA1     | 979  | 2    | 0    | 0    | 1    | 0    | 0    |
| ENSP00000355387 | SCAMP5   | 235  | 3    | 2.5  | 0    | 0    | 2    | 0    |
| ENSP00000355493 | ADSS     | 456  | 1    | 0    | 0    | 1    | 0    | 0    |
| ENSP00000355560 | TBCE     | 527  | 1    | 0    | 0    | 0    | 0    | 0    |
| ENSP00000355720 | JMJD4    | 463  | 1    | 0    | 0    | 0    | 0    | 0    |
| ENSP00000355752 | C1orf95  | 141  | 1    | 2    | 1    | 1    | 0    | 0    |
| ENSP00000356137 | NFASC    | 1071 | 1    | 0    | 0    | 2    | 1    | 1    |
| ENSP00000356141 | NFASC    | 1041 | 1    | 0    | 0    | 1    | 0    | 0    |
| ENSP00000356236 | SYT2     | 419  | 6    | 9    | 9    | 1    | 6    | 3    |
| ENSP00000356237 | SYT2     | 419  | 7    | 5    | 7    | 2    | 3    | 2    |
| ENSP00000356537 | GLUL     | 373  | 3    | 1    | 0    | 3    | 1    | 0    |
| ENSP00000356787 | ATP1B1   | 295  | 26   | 25   | 24   | 24   | 19   | 13   |
| ENSP00000356789 | ATP1B1   | 303  | 23   | 26   | 23   | 20   | 21   | 15   |
| ENSP00000356790 | ATP1B1   | 303  | 1    | 1    | 1    | 1    | 2    | 2    |
| ENSP00000357060 | ATP1A4   | 1029 | 79.5 | 91.5 | 70.5 | 66.5 | 59   | 61.5 |
| ENSP00000357065 | IGSF8    | 613  | 2    | 0    | 0    | 1    | 1    | 1    |
| ENSP00000357106 | CADM3    | 432  | 1    | 0    | 1    | 0    | 0    | 0    |
| ENSP00000357177 | ARHGEF11 | 1562 | 3    | 1    | 1    | 1    | 0    | 0    |
| ENSP00000357244 | CCT3     | 500  | 3    | 8    | 8    | 6    | 14   | 3    |
| ENSP00000357251 | SOGA3    | 947  | 1    | 0    | 0    | 1    | 0    | 2    |
| ENSP00000357564 | RAB13    | 203  | 2    | 2    | 3    | 1    | 5    | 6    |
| ENSP00000357609 | STK32C   | 276  | 1    | 0    | 0    | 0    | 0    | 0    |
| ENSP00000357624 | MARCKS   | 332  | 10   | 12   | 11   | 13   | 15   | 10   |
| ENSP00000357722 | S100A8   | 93   | 1    | 0    | 0    | 0    | 0    | 0    |
| ENSP00000358124 | VPS45    | 538  | 1    | 0    | 0    | 0    | 1    | 0    |
| ENSP00000358141 | SV2A     | 682  | 14   | 6    | 9    | 10   | 11   | 9    |



|                 |          |      |     |     |    |    |      |    |
|-----------------|----------|------|-----|-----|----|----|------|----|
| ENSP00000358159 | ASCC3    | 2202 | 1   | 1   | 0  | 0  | 0    | 1  |
| ENSP00000358211 | HSPA12A  | 675  | 11  | 15  | 9  | 14 | 22   | 8  |
| ENSP00000358224 | PPIAL4C  | 164  | 1   | 3   | 0  | 0  | 2    | 1  |
| ENSP00000358415 | PHGDH    | 499  | 1   | 3   | 2  | 1  | 4    | 2  |
| ENSP00000358417 | PHGDH    | 533  | 1   | 0   | 1  | 1  | 3    | 2  |
| ENSP00000358508 | ATP1A1   | 992  | 61  | 49  | 39 | 51 | 32   | 25 |
| ENSP00000358628 | MAGI3    | 1125 | 1   | 2   | 1  | 0  | 1    | 0  |
| ENSP00000358630 | MAGI3    | 1150 | 1   | 2   | 2  | 0  | 2    | 1  |
| ENSP00000358656 | RHOC     | 193  | 1   | 1   | 0  | 1  | 0    | 0  |
| ENSP00000358812 | PDCD11   | 1871 | 1   | 1   | 2  | 1  | 1    | 0  |
| ENSP00000358814 | AHCYL1   | 530  | 2   | 6   | 5  | 2  | 3    | 0  |
| ENSP00000358827 | GSTM5    | 237  | 1   | 0   | 1  | 2  | 0    | 1  |
| ENSP00000358846 | GSTM2    | 220  | 2   | 4   | 4  | 5  | 4    | 0  |
| ENSP00000358921 | ACTR1A   | 376  | 8   | 3   | 3  | 9  | 4    | 1  |
| ENSP00000358990 | IRAK1    | 339  | 1   | 0   | 0  | 0  | 0    | 0  |
| ENSP00000358992 | MYO6     | 1253 | 1   | 0   | 0  | 0  | 0    | 0  |
| ENSP00000358994 | MYO6     | 1285 | 1   | 0   | 0  | 0  | 0    | 0  |
| ENSP00000359345 | RPL5     | 297  | 1   | 0   | 0  | 0  | 0    | 1  |
| ENSP00000359539 | GOT1     | 413  | 2   | 0   | 0  | 2  | 1    | 0  |
| ENSP00000359991 | PGAM1    | 254  | 7   | 17  | 14 | 9  | 11.5 | 9  |
| ENSP00000360124 | PGM1     | 580  | 3   | 3   | 6  | 3  | 7    | 2  |
| ENSP00000360467 | LGI1     | 291  | 2   | 1   | 1  | 0  | 1    | 0  |
| ENSP00000360609 | HSP90AB1 | 724  | 13  | 9   | 16 | 21 | 23.5 | 16 |
| ENSP00000360626 | KCNG1    | 513  | 3   | 3   | 2  | 2  | 2    | 2  |
| ENSP00000360671 | SLC25A5  | 298  | 3   | 1   | 0  | 0  | 0    | 0  |
| ENSP00000361057 | SURF4    | 269  | 1.5 | 1   | 0  | 0  | 0    | 1  |
| ENSP00000361071 | RPL7A    | 151  | 2   | 1   | 2  | 1  | 0    | 0  |
| ENSP00000361495 | PRPS1    | 218  | 1   | 3   | 0  | 2  | 0    | 0  |
| ENSP00000361505 | PRPS1    | 251  | 1   | 0   | 0  | 0  | 0    | 0  |
| ENSP00000361816 | SPTAN1   | 2472 | 1   | 0   | 0  | 3  | 0    | 0  |
| ENSP00000361930 | YWHAB    | 246  | 7   | 14  | 13 | 9  | 15   | 7  |
| ENSP00000361965 | ADA      | 363  | 1   | 0   | 0  | 0  | 0    | 0  |
| ENSP00000361990 | UBR2     | 1755 | 1   | 0   | 0  | 0  | 0    | 0  |
| ENSP00000361992 | UBR2     | 1755 | 1   | 0   | 0  | 0  | 0    | 0  |
| ENSP00000362010 | ANXA7    | 488  | 1   | 0   | 0  | 1  | 0    | 0  |
| ENSP00000362014 | DNM1     | 864  | 1   | 0   | 1  | 0  | 3    | 1  |
| ENSP00000362249 | AK1      | 194  | 1   | 3   | 0  | 0  | 0    | 0  |
| ENSP00000362271 | AK1      | 194  | 2   | 3   | 0  | 1  | 4    | 2  |
| ENSP00000362317 | CLSPN    | 1275 | 1   | 0   | 0  | 0  | 0    | 0  |
| ENSP00000362340 | NCDN     | 729  | 19  | 27  | 25 | 26 | 34   | 23 |
| ENSP00000362350 | NCDN     | 712  | 6   | 13  | 8  | 5  | 12   | 6  |
| ENSP00000362396 | STXBP1   | 594  | 69  | 108 | 93 | 66 | 116  | 77 |
| ENSP00000362399 | STXBP1   | 603  | 20  | 23  | 23 | 18 | 27   | 16 |
| ENSP00000362413 | PGK1     | 417  | 26  | 41  | 36 | 30 | 47   | 31 |
| ENSP00000362566 | HPCA     | 193  | 3   | 4   | 0  | 2  | 3    | 3  |
| ENSP00000362638 | MARCKSL1 | 195  | 2   | 5   | 3  | 3  | 5    | 1  |
| ENSP00000362744 | RPS4X    | 263  | 1   | 4   | 5  | 0  | 0    | 0  |
| ENSP00000362946 | RAB14    | 215  | 5   | 16  | 7  | 6  | 15   | 4  |
| ENSP00000362985 | PHYHIPL  | 350  | 1   | 2   | 2  | 1  | 1    | 1  |
| ENSP00000362987 | PHYHIPL  | 376  | 1   | 3   | 0  | 0  | 0    | 0  |
| ENSP00000363057 | EPB41L1  | 701  | 2   | 2   | 0  | 1  | 0    | 1  |
| ENSP00000363216 | OGDHL    | 1010 | 1   | 0   | 0  | 1  | 0    | 0  |
| ENSP00000363362 | KIAA1958 | 738  | 1   | 0   | 0  | 0  | 0    | 0  |
| ENSP00000363500 | CLIC4    | 253  | 2   | 4   | 1  | 0  | 3    | 2  |
| ENSP00000363537 | ADAM23   | 832  | 1   | 0   | 0  | 1  | 0    | 0  |
| ENSP00000363626 | LYPLA2   | 180  | 1   | 1   | 1  | 1  | 1    | 1  |
| ENSP00000363638 | LYPLA2   | 231  | 1   | 2   | 2  | 1  | 0    | 1  |
| ENSP00000363910 | OPCML    | 304  | 5   | 5   | 3  | 6  | 5    | 4  |

|                 |        |      |       |      |      |    |      |       |
|-----------------|--------|------|-------|------|------|----|------|-------|
| ENSP00000363916 | NTM    | 316  | 3     | 2    | 1    | 3  | 1    | 2     |
| ENSP00000363988 | ALDOB  | 364  | 1     | 0    | 0    | 2  | 0    | 6     |
| ENSP00000364145 | PFKFB1 | 471  | 1     | 0    | 0    | 0  | 0    | 0     |
| ENSP00000364209 | MAGED2 | 606  | 1     | 0    | 0    | 0  | 0    | 0     |
| ENSP00000364239 | TRIM14 | 442  | 1     | 0    | 0    | 0  | 0    | 0     |
| ENSP00000364298 | FKBPL  | 349  | 2     | 1    | 0    | 0  | 2    | 0     |
| ENSP00000364345 | EMC1   | 992  | 1     | 2    | 0    | 0  | 2    | 0     |
| ENSP00000364365 | UBR4   | 5176 | 1     | 0    | 0    | 0  | 0    | 0     |
| ENSP00000364416 | UBR4   | 5204 | 1     | 0    | 0    | 0  | 0    | 0     |
| ENSP00000364691 | CROCC  | 2017 | 1     | 0    | 0    | 0  | 0    | 0     |
| ENSP00000364883 | AUH    | 339  | 2     | 3    | 6    | 0  | 2    | 0     |
| ENSP00000364912 | SPEN   | 3664 | 1     | 0    | 0    | 0  | 0    | 0     |
| ENSP00000364919 | DIRAS2 | 199  | 1     | 8    | 4    | 1  | 3    | 1     |
| ENSP00000364960 | RAB18  | 161  | 1     | 7    | 0    | 1  | 3    | 3     |
| ENSP00000365158 | UGGT1  | 1531 | 1     | 1    | 0    | 1  | 0    | 0     |
| ENSP00000365437 | GAD2   | 585  | 1     | 2    | 5    | 3  | 7    | 1     |
| ENSP00000365439 | HNRNPK | 464  | 1     | 1    | 1    | 3  | 5    | 1     |
| ENSP00000365572 | NME2   | 197  | 1     | 0    | 0    | 1  | 0    | 0     |
| ENSP00000365687 | PTF1A  | 328  | 2     | 0    | 0    | 1  | 0    | 0     |
| ENSP00000366084 | ABCC4  | 1325 | 1     | 0    | 0    | 0  | 0    | 0     |
| ENSP00000366225 | NAPB   | 298  | 9     | 9    | 7    | 8  | 9    | 3     |
| ENSP00000366260 | CNNM3  | 659  | 1     | 0    | 0    | 0  | 0    | 0     |
| ENSP00000366311 | USP11  | 920  | 2     | 0    | 1    | 1  | 1    | 0     |
| ENSP00000366326 | NEBL   | 1014 | 1     | 0    | 0    | 0  | 0    | 1     |
| ENSP00000366481 | UBA1   | 506  | 8     | 9    | 3    | 8  | 11   | 8     |
| ENSP00000366650 | PYGM   | 754  | 11    | 10   | 13   | 10 | 21   | 9     |
| ENSP00000366672 | DTD1   | 209  | 1     | 2    | 2    | 1  | 2    | 0     |
| ENSP00000367099 | BFSP1  | 540  | 1     | 0    | 0    | 0  | 0    | 0     |
| ENSP00000367220 | ACTR2  | 399  | 3     | 6    | 5    | 6  | 8    | 3     |
| ENSP00000367258 | EEF1G  | 487  | 1     | 6    | 4    | 1  | 7    | 1     |
| ENSP00000367323 | KCNAB2 | 415  | 1     | 0    | 2    | 0  | 0    | 0     |
| ENSP00000367558 | USP9X  | 2554 | 4     | 4    | 2    | 3  | 4    | 5     |
| ENSP00000367562 | TMX2   | 258  | 2     | 2    | 0    | 2  | 0    | 0     |
| ENSP00000367615 | APRT   | 180  | 1     | 1    | 0    | 0  | 0    | 0     |
| ENSP00000367872 | GNB1   | 340  | 5     | 7    | 6    | 4  | 3    | 3     |
| ENSP00000367873 | CDKAL1 | 579  | 1     | 0    | 0    | 0  | 0    | 0     |
| ENSP00000367923 | SUCLA2 | 463  | 1     | 1    | 3    | 3  | 1    | 2     |
| ENSP00000367992 | ESD    | 282  | 1     | 2    | 1    | 1  | 2    | 1     |
| ENSP00000368270 | RAP1B  | 118  | 1     | 0    | 0    | 0  | 0    | 0     |
| ENSP00000368352 | CDS2   | 325  | 2     | 2    | 0    | 2  | 0    | 1     |
| ENSP00000368403 | PAX6   | 422  | 1     | 0    | 0    | 0  | 0    | 0     |
| ENSP00000368566 | ACSL6  | 722  | 3     | 3    | 5    | 0  | 5    | 0     |
| ENSP00000368722 | LDHA   | 332  | 7     | 6    | 6    | 6  | 7    | 5     |
| ENSP00000368752 | PRNP   | 253  | 1     | 1    | 0    | 0  | 1    | 0     |
| ENSP00000369134 | PDHA1  | 428  | 1     | 1    | 3    | 0  | 0    | 0     |
| ENSP00000369315 | MYH10  | 1992 | 1     | 0    | 0    | 0  | 0    | 0     |
| ENSP00000369470 | GDI2   | 148  | 1     | 1    | 0    | 3  | 2    | 1     |
| ENSP00000369475 | GDI2   | 449  | 7     | 5    | 7    | 14 | 8    | 8     |
| ENSP00000369528 | GDI2   | 400  | 7     | 6    | 7    | 15 | 8    | 7     |
| ENSP00000369602 | HBG2   | 137  | 20    | 22   | 20   | 20 | 25   | 24    |
| ENSP00000369654 | HBD    | 147  | 13    | 30   | 17   | 20 | 25   | 14    |
| ENSP00000369703 | TUBB2A | 445  | 37.33 | 94.5 | 78.5 | 53 | 87.5 | 50.83 |
| ENSP00000370023 | HADHA  | 763  | 1     | 0    | 0    | 0  | 0    | 0     |
| ENSP00000370223 | IDH3B  | 385  | 2     | 0    | 3    | 1  | 1    | 4     |
| ENSP00000370232 | IDH3B  | 383  | 2     | 0    | 3    | 1  | 1    | 4     |
| ENSP00000370388 | DNM1L  | 738  | 2     | 9    | 4.5  | 2  | 9    | 7     |
| ENSP00000370465 | PFKP   | 776  | 1     | 6    | 6    | 0  | 7    | 8     |
| ENSP00000370582 | CD99   | 169  | 1     | 0    | 0    | 0  | 0    | 0     |

|                 |          |      |     |     |     |      |       |     |
|-----------------|----------|------|-----|-----|-----|------|-------|-----|
| ENSP00000370724 | FAM49A   | 323  | 1   | 1   | 0   | 0    | 0     | 0   |
| ENSP00000370808 | SLC25A6  | 298  | 2   | 3   | 2   | 1    | 0     | 0   |
| ENSP00000371024 | PDIA6    | 445  | 4   | 1   | 0   | 3    | 1     | 1   |
| ENSP00000371084 | ATP8A1   | 1164 | 4   | 2   | 0   | 2    | 0     | 3   |
| ENSP00000371184 | HPCAL1   | 193  | 1   | 3   | 0   | 2    | 0     | 0   |
| ENSP00000371257 | CIITA    | 546  | 1   | 1   | 0   | 1    | 0     | 0   |
| ENSP00000371372 | ATP12A   | 1039 | 1   | 0   | 0   | 0    | 0     | 0   |
| ENSP00000371735 | SACS     | 4579 | 1   | 0   | 0   | 0    | 0     | 0   |
| ENSP00000371798 | FSCN1    | 493  | 10  | 9   | 10  | 7    | 6     | 7   |
| ENSP00000371889 | WDR1     | 466  | 2   | 1   | 2   | 2    | 4     | 1   |
| ENSP00000371890 | WDR1     | 606  | 4   | 4   | 3   | 4    | 8     | 8   |
| ENSP00000371894 | AP2M1    | 433  | 6   | 8   | 9   | 9    | 13    | 10  |
| ENSP00000372515 | SEPT5    | 378  | 3   | 5   | 4   | 1    | 3     | 2   |
| ENSP00000373200 | CADM2    | 404  | 2   | 2   | 0   | 2    | 2     | 0   |
| ENSP00000373620 | HSPD1    | 573  | 1   | 1   | 1   | 2    | 5     | 2   |
| ENSP00000373713 | SACM1L   | 587  | 1   | 3   | 2   | 2    | 2     | 1   |
| ENSP00000373860 | ASPDH    | 283  | 1   | 0   | 2   | 2    | 0     | 0   |
| ENSP00000373918 | GARS     | 739  | 1   | 0   | 2   | 3    | 3     | 0   |
| ENSP00000374292 | CCDC57   | 916  | 1   | 0   | 0   | 0    | 0     | 0   |
| ENSP00000374304 | DOK7     | 608  | 2   | 0   | 0   | 1    | 0     | 0   |
| ENSP00000374408 | MROH2A   | 1674 | 2   | 4   | 2   | 0    | 0     | 0   |
| ENSP00000375391 | HSPA1B   | 641  | 13  | 14  | 9   | 12   | 15    | 7   |
| ENSP00000375668 | PPP2R1A  | 132  | 3   | 4   | 4   | 5    | 4     | 5   |
| ENSP00000375816 | ATP2B4   | 1134 | 3   | 2   | 0   | 3    | 1.5   | 1   |
| ENSP00000375938 | TUBA4A   | 433  | 25  | 23  | 21  | 14   | 16    | 19  |
| ENSP00000376016 | EZR      | 554  | 1   | 0   | 0   | 0    | 0     | 0   |
| ENSP00000376066 | ATP1A2   | 1009 | 8   | 11  | 3   | 6    | 3     | 7   |
| ENSP00000376174 | RAN      | 233  | 2   | 9   | 8   | 2    | 7.5   | 2   |
| ENSP00000376763 | CLTC     | 1639 | 172 | 224 | 184 | 186  | 198.5 | 214 |
| ENSP00000376808 | CUL5     | 780  | 1   | 0   | 2   | 0    | 3     | 1   |
| ENSP00000376855 | DPP10    | 800  | 1   | 0   | 1   | 0    | 1     | 0   |
| ENSP00000376869 | ATP2B1   | 963  | 8   | 10  | 3   | 4    | 0     | 1   |
| ENSP00000376885 | CPNE5    | 301  | 1   | 0   | 0   | 0    | 1     | 0   |
| ENSP00000376892 | NME1     | 152  | 1   | 0   | 0   | 0    | 1     | 0   |
| ENSP00000376932 | SYT1     | 422  | 5   | 6   | 10  | 9    | 10    | 7   |
| ENSP00000377016 | FLT4     | 1298 | 1   | 1   | 0   | 0    | 0     | 1   |
| ENSP00000377195 | DBN1     | 695  | 1   | 5   | 2   | 0    | 1     | 1   |
| ENSP00000377275 | GOLGB1   | 3269 | 1   | 0   | 0   | 0    | 0     | 0   |
| ENSP00000377446 | SUCLG1   | 346  | 2   | 3   | 2   | 1    | 2     | 3   |
| ENSP00000377466 | CNP      | 401  | 11  | 16  | 10  | 23   | 20    | 16  |
| ENSP00000377470 | CNP      | 421  | 21  | 23  | 14  | 34   | 29    | 24  |
| ENSP00000377474 | ACLY     | 1091 | 1   | 2   | 2   | 1    | 6     | 7   |
| ENSP00000377833 | ANXA4    | 321  | 1   | 1   | 0   | 2    | 1     | 0   |
| ENSP00000377925 | ACACA    | 42   | 1   | 0   | 0   | 0    | 0     | 0   |
| ENSP00000377945 | MDH1     | 334  | 5   | 3   | 3   | 5    | 2     | 1   |
| ENSP00000377952 | PSMD6    | 351  | 1   | 0   | 0   | 0    | 0     | 0   |
| ENSP00000377958 | CCT4     | 539  | 10  | 6.5 | 4   | 11   | 9     | 2   |
| ENSP00000378174 | SCUBE3   | 1009 | 2   | 6   | 2   | 0    | 1     | 0   |
| ENSP00000378355 | POR      | 633  | 2   | 2   | 1   | 0    | 0     | 0   |
| ENSP00000378366 | FLOT2    | 483  | 4   | 2   | 0   | 0    | 0     | 0   |
| ENSP00000378479 | SOS1     | 1318 | 1   | 0   | 0   | 0    | 0     | 1   |
| ENSP00000378492 | GRM2     | 872  | 1   | 1   | 0   | 0    | 1     | 0   |
| ENSP00000378656 | PFKM     | 749  | 0.5 | 0   | 1   | 0.5  | 2     | 0   |
| ENSP00000378729 | ALDOC    | 336  | 22  | 41  | 31  | 22.5 | 33    | 22  |
| ENSP00000378872 | ATP2A2   | 1015 | 6   | 14  | 5   | 7    | 10    | 9   |
| ENSP00000378879 | ATP2A1   | 994  | 5   | 3   | 4   | 5    | 6     | 3   |
| ENSP00000379099 | SLC1A2   | 565  | 13  | 7   | 5   | 7    | 1     | 1   |
| ENSP00000379203 | ATP6V1C1 | 382  | 1   | 0   | 1   | 2    | 0     | 3   |

|                 |             |      |     |      |      |     |      |     |
|-----------------|-------------|------|-----|------|------|-----|------|-----|
| ENSP00000379281 | YWHAZ       | 245  | 3   | 3    | 1    | 4   | 4    | 1   |
| ENSP00000379385 | LDHB        | 232  | 2   | 0    | 1    | 2   | 0    | 4   |
| ENSP00000379386 | LDHB        | 334  | 2   | 0    | 0    | 2   | 1    | 3   |
| ENSP00000379539 | MYH10       | 1997 | 1   | 2    | 1    | 0   | 0    | 0   |
| ENSP00000379602 | VAMP1       | 118  | 4   | 5    | 2    | 3   | 2    | 4   |
| ENSP00000379626 | GNB5        | 283  | 1   | 3    | 3    | 2   | 3    | 1   |
| ENSP00000379703 | SEPT3       | 350  | 1   | 2    | 3    | 2   | 3    | 1   |
| ENSP00000379769 | ACO2        | 805  | 20  | 4    | 8    | 11  | 21   | 7   |
| ENSP00000379845 | ABAT        | 500  | 2   | 1    | 1    | 3   | 0    | 1   |
| ENSP00000379933 | TPI1        | 249  | 1   | 2    | 2    | 2   | 1    | 2   |
| ENSP00000380067 | GAPDH       | 293  | 4   | 14   | 13.5 | 5   | 15   | 6   |
| ENSP00000380104 | HBE1        | 87   | 44  | 50   | 41   | 49  | 55   | 43  |
| ENSP00000380211 | CPNE6       | 557  | 2   | 0    | 0    | 1   | 1    | 0   |
| ENSP00000380267 | ATP2B2      | 1198 | 13  | 22   | 22   | 10  | 18   | 13  |
| ENSP00000380378 | PAFAH1B1    | 410  | 5   | 5    | 5    | 3   | 1.5  | 3   |
| ENSP00000380427 | ARPC4-TTLL3 | 625  | 3   | 8    | 0    | 0   | 2    | 1   |
| ENSP00000380646 | TMEM80      | 216  | 1   | 0    | 0    | 0   | 0    | 0   |
| ENSP00000380723 | HRAS        | 189  | 1   | 2    | 1    | 0   | 2    | 2   |
| ENSP00000380814 | SLC12A6     | 1091 | 1   | 0    | 0    | 1   | 0    | 0   |
| ENSP00000380899 | HBA1        | 110  | 4   | 10   | 5    | 8   | 8    | 5   |
| ENSP00000380987 | CRMP1       | 572  | 18  | 31   | 25   | 18  | 51   | 21  |
| ENSP00000381293 | NSF         | 744  | 23  | 38   | 30   | 27  | 42   | 14  |
| ENSP00000381412 | CAMK2A      | 489  | 9   | 9    | 7    | 3   | 5    | 3   |
| ENSP00000381456 | CCT7        | 339  | 1   | 1    | 0    | 0   | 1    | 1   |
| ENSP00000381459 | NAPB        | 204  | 1   | 1    | 0    | 1   | 0    | 0   |
| ENSP00000381504 | PRPS2       | 321  | 1   | 1    | 0    | 2   | 0    | 0   |
| ENSP00000381526 | DPYSL3      | 570  | 5   | 2    | 1    | 4   | 7    | 4   |
| ENSP00000381577 | USP34       | 3546 | 1   | 0    | 0    | 0   | 0    | 0   |
| ENSP00000381589 | PCDHGA11    | 935  | 1   | 0    | 0    | 0   | 0    | 0   |
| ENSP00000381803 | MAPK1       | 360  | 2   | 3    | 1    | 2   | 2    | 1   |
| ENSP00000381823 | SEC24A      | 1093 | 0.5 | 0    | 0    | 1   | 0    | 0   |
| ENSP00000382175 | MYO5A       | 585  | 3   | 1    | 2    | 1   | 2    | 2   |
| ENSP00000382179 | MYO5A       | 1852 | 1   | 1    | 3    | 0   | 2    | 2   |
| ENSP00000382380 | MAP1A       | 2805 | 1   | 2    | 2    | 1   | 2    | 0   |
| ENSP00000382412 | HMGB1       | 158  | 1   | 3    | 2    | 0   | 1    | 0   |
| ENSP00000382608 | HSPA12B     | 600  | 2   | 0    | 0    | 1.5 | 0    | 0   |
| ENSP00000382694 | ATP6V1E1    | 196  | 2   | 4    | 10   | 5   | 6    | 3   |
| ENSP00000382696 | ATP6V1E1    | 204  | 9   | 22.5 | 13   | 8   | 13   | 5   |
| ENSP00000382880 | VAPA        | 249  | 1   | 0    | 1    | 0   | 0    | 0   |
| ENSP00000382915 | HSPA1A      | 641  | 8   | 11   | 7.5  | 7.5 | 7.5  | 3   |
| ENSP00000382980 | CSNK2B      | 215  | 1   | 0    | 1    | 2   | 1    | 2   |
| ENSP00000382981 | EPB41L3     | 865  | 23  | 18   | 15   | 21  | 26   | 14  |
| ENSP00000382982 | TUBA3C      | 450  | 241 | 465  | 334  | 247 | 393  | 315 |
| ENSP00000383118 | CDC42       | 191  | 3   | 5    | 1    | 8   | 6    | 2   |
| ENSP00000383170 | PHLPP1      | 1205 | 1   | 0    | 0    | 0   | 0    | 0   |
| ENSP00000383191 | COL18A1     | 1339 | 1   | 0    | 0    | 0   | 0    | 0   |
| ENSP00000383366 | EFCAB8      | 395  | 1   | 0    | 0    | 0   | 0    | 0   |
| ENSP00000383392 | NCAM2       | 837  | 1   | 0    | 0    | 0   | 1    | 0   |
| ENSP00000383934 | RAB37       | 216  | 2   | 2.5  | 0.33 | 0.5 | 2.66 | 0   |
| ENSP00000384014 | VSNL1       | 191  | 8   | 14   | 2    | 8   | 8    | 6   |
| ENSP00000384038 | PFKL        | 827  | 2.5 | 2    | 2    | 2.5 | 4    | 4   |
| ENSP00000384144 | HYOU1       | 999  | 5   | 6    | 2    | 3   | 2    | 10  |
| ENSP00000384194 | AP1B1       | 949  | 2   | 4    | 3    | 4   | 5    | 5   |
| ENSP00000384311 | NRXN1       | 1477 | 1   | 1    | 0    | 1   | 0    | 1   |
| ENSP00000384313 | MAST4       | 2434 | 1   | 0    | 0    | 0   | 0    | 0   |
| ENSP00000384393 | DPP6        | 353  | 3   | 0    | 0    | 0   | 0    | 0   |
| ENSP00000384471 | RTN4        | 986  | 3   | 6    | 0    | 3   | 0    | 0   |
| ENSP00000384675 | SOS1        | 1333 | 1   | 0    | 0    | 0   | 0    | 1   |

|                 |         |      |      |    |     |    |      |      |
|-----------------|---------|------|------|----|-----|----|------|------|
| ENSP00000384930 | PPM1F   | 286  | 1    | 0  | 0   | 1  | 0    | 0    |
| ENSP00000385142 | NRXN1   | 1547 | 1    | 0  | 0   | 0  | 0    | 1    |
| ENSP00000385447 | SYNGR1  | 169  | 9    | 12 | 14  | 10 | 10   | 3    |
| ENSP00000385828 | TST     | 297  | 1    | 0  | 0   | 0  | 0    | 0    |
| ENSP00000385844 | SACS    | 3829 | 1    | 0  | 0   | 0  | 0    | 0    |
| ENSP00000385923 | NUCB1   | 461  | 4    | 0  | 0   | 0  | 0    | 0    |
| ENSP00000385958 | RPS14   | 151  | 1    | 3  | 0   | 0  | 1    | 1    |
| ENSP00000386190 | C2orf16 | 1984 | 2    | 1  | 0   | 1  | 0    | 1    |
| ENSP00000386192 | DNM2    | 866  | 11.5 | 7  | 7   | 11 | 16   | 9    |
| ENSP00000386249 | SGOL2   | 247  | 1    | 0  | 1   | 0  | 1    | 0    |
| ENSP00000386350 | OLA1    | 416  | 3    | 4  | 1   | 4  | 2    | 1    |
| ENSP00000386719 | MDH1    | 210  | 1    | 1  | 1   | 1  | 0    | 1    |
| ENSP00000386936 | TPRKB   | 214  | 1    | 0  | 0   | 0  | 0    | 0    |
| ENSP00000387028 | PGAP1   | 592  | 1    | 0  | 0   | 1  | 0    | 0    |
| ENSP00000387176 | POTEJ   | 1038 | 6    | 12 | 5   | 6  | 6    | 9    |
| ENSP00000387246 | MAP3K2  | 619  | 1    | 1  | 1   | 0  | 0    | 0    |
| ENSP00000387270 | DCTN1   | 1139 | 2    | 1  | 1   | 0  | 5    | 4    |
| ENSP00000387286 | RAB1A   | 205  | 5    | 11 | 1   | 9  | 15.5 | 18.5 |
| ENSP00000387506 | IDH3A   | 257  | 12   | 9  | 6   | 11 | 7    | 6    |
| ENSP00000387545 | ANXA2   | 339  | 1    | 1  | 0   | 1  | 2    | 1    |
| ENSP00000387641 | CAND2   | 1236 | 1    | 0  | 0   | 0  | 0    | 1    |
| ENSP00000387694 | SLC12A5 | 1139 | 16   | 18 | 15  | 10 | 11   | 12   |
| ENSP00000387725 | SLC12A6 | 1091 | 5    | 1  | 1   | 4  | 1    | 0    |
| ENSP00000387802 | CADM3   | 234  | 1    | 0  | 1   | 0  | 0    | 0    |
| ENSP00000388169 | ARPC4   | 187  | 1    | 1  | 0   | 0  | 0    | 0    |
| ENSP00000388347 | GNAI1   | 41   | 1    | 0  | 1   | 1  | 1    | 0    |
| ENSP00000388374 | P4HB    | 464  | 2    | 0  | 0   | 3  | 1    | 0    |
| ENSP00000388778 | HSPH1   | 677  | 1    | 0  | 1   | 3  | 5    | 1    |
| ENSP00000388804 | CDH13   | 175  | 2    | 1  | 0   | 0  | 1    | 0    |
| ENSP00000389007 | NUCB1   | 267  | 1    | 0  | 0   | 0  | 0    | 0    |
| ENSP00000389047 | PRDX1   | 171  | 1    | 5  | 0   | 1  | 2    | 0    |
| ENSP00000389372 | CLASP1  | 1494 | 1    | 1  | 0   | 1  | 1    | 0    |
| ENSP00000389435 | GNAI1   | 144  | 2    | 3  | 6   | 7  | 0    | 3    |
| ENSP00000390124 | VSNL1   | 104  | 1    | 2  | 0   | 2  | 2    | 1    |
| ENSP00000390129 | VDAC1   | 184  | 1    | 0  | 3   | 1  | 1    | 1    |
| ENSP00000390367 | FDFT1   | 374  | 1    | 0  | 0   | 0  | 0    | 0    |
| ENSP00000390555 | PGAP1   | 159  | 1    | 0  | 1   | 0  | 0    | 0    |
| ENSP00000390600 | SCN10A  | 1956 | 3    | 4  | 2   | 2  | 1    | 2    |
| ENSP00000390632 | MOG     | 295  | 1    | 1  | 1   | 1  | 2    | 0    |
| ENSP00000390944 | QDPR    | 213  | 1    | 5  | 3   | 2  | 4    | 1    |
| ENSP00000391075 | IDH1    | 157  | 1    | 0  | 0   | 0  | 0    | 0    |
| ENSP00000391243 | DDR1    | 493  | 1    | 0  | 0   | 0  | 0    | 0    |
| ENSP00000391319 | RAB5B   | 174  | 1    | 6  | 3   | 1  | 4    | 3    |
| ENSP00000391429 | EHD1    | 306  | 2    | 3  | 3   | 2  | 5    | 1    |
| ENSP00000391877 | SPIB    | 171  | 1    | 0  | 0   | 0  | 0    | 0    |
| ENSP00000391905 | PPP2R1A | 395  | 5    | 7  | 10  | 5  | 13   | 3    |
| ENSP00000392028 | CHD7    | 2997 | 1    | 0  | 0   | 0  | 0    | 0    |
| ENSP00000392043 | ATP2B1  | 1220 | 9    | 10 | 3   | 5  | 4    | 1    |
| ENSP00000392208 | CNTNAP2 | 185  | 1    | 1  | 1   | 0  | 0    | 0    |
| ENSP00000392366 | EEF1A1  | 106  | 4    | 9  | 2.5 | 2  | 4    | 2    |
| ENSP00000392494 | DDX3X   | 646  | 1    | 1  | 1   | 0  | 1    | 0    |
| ENSP00000392686 | EIF4A2  | 96   | 1    | 0  | 1   | 0  | 0    | 0    |
| ENSP00000392765 | GNB1    | 165  | 2    | 2  | 1   | 1  | 3    | 3    |
| ENSP00000392878 | OGDH    | 1019 | 4    | 3  | 0   | 4  | 2    | 1    |
| ENSP00000393340 | TUBB    | 372  | 20   | 29 | 9   | 20 | 22   | 18   |
| ENSP00000393391 | PLP1    | 100  | 6    | 4  | 4   | 8  | 6    | 4    |
| ENSP00000393509 | CAPZA2  | 172  | 1    | 2  | 2   | 2  | 2    | 1    |
| ENSP00000393926 | HSPA4L  | 870  | 1    | 3  | 4   | 1  | 8    | 3    |

|                 |          |      |     |      |     |     |      |     |
|-----------------|----------|------|-----|------|-----|-----|------|-----|
| ENSP00000394071 | GDI1     | 447  | 5   | 9    | 11  | 8   | 12   | 7   |
| ENSP00000394318 | RAP1A    | 184  | 2   | 6    | 1   | 4   | 6    | 2   |
| ENSP00000394558 | YWHAB    | 74   | 6   | 2    | 4   | 7   | 7.5  | 0   |
| ENSP00000394670 | PPIA     | 120  | 4   | 16   | 2   | 4   | 9    | 9   |
| ENSP00000394729 | YWHAB    | 100  | 3   | 7    | 5   | 3   | 8    | 1   |
| ENSP00000394817 | CANX     | 627  | 5   | 1    | 4   | 6   | 4    | 3   |
| ENSP00000395370 | ARF3     | 144  | 1   | 3    | 0   | 1   | 0    | 2   |
| ENSP00000395521 | SLC2A1   | 249  | 1   | 0    | 0   | 1   | 0    | 0   |
| ENSP00000395616 | PRKCSH   | 525  | 1   | 1    | 1   | 0   | 0    | 0   |
| ENSP00000395628 | PAFAH1B1 | 205  | 2   | 1    | 2   | 1   | 0    | 1   |
| ENSP00000395797 | SLC4A10  | 1088 | 5   | 6    | 5   | 4   | 2    | 3   |
| ENSP00000396061 | TUBA4A   | 153  | 30  | 42   | 25  | 19  | 33   | 34  |
| ENSP00000396127 | RAN      | 234  | 5   | 17   | 16  | 7   | 14.5 | 7   |
| ENSP00000396189 | HSP90AA1 | 413  | 15  | 11   | 9   | 16  | 18   | 11  |
| ENSP00000396268 | ERG      | 387  | 1   | 0    | 0   | 0   | 0    | 0   |
| ENSP00000396632 | RAB5A    | 65   | 2   | 2    | 3   | 3   | 1    | 1   |
| ENSP00000396684 | BTN3A1   | 378  | 1   | 0    | 0   | 0   | 0    | 0   |
| ENSP00000396722 | NTM      | 355  | 6   | 4    | 3   | 5   | 4    | 4   |
| ENSP00000397808 | RTN4     | 203  | 1   | 2    | 0   | 0   | 0    | 0   |
| ENSP00000398054 | RAB2A    | 104  | 1   | 8    | 0   | 1   | 5    | 2   |
| ENSP00000398239 | ACTA2    | 151  | 17  | 47   | 37  | 21  | 30   | 31  |
| ENSP00000398320 | GLUL     | 373  | 11  | 8    | 6   | 11  | 10   | 5   |
| ENSP00000398327 | CDC42    | 136  | 1   | 6    | 1   | 0   | 3    | 5   |
| ENSP00000398370 | EIF4A2   | 408  | 1   | 3    | 1   | 0   | 2    | 3   |
| ENSP00000398393 | ACTN4    | 342  | 2   | 0    | 0   | 1   | 0    | 0   |
| ENSP00000398481 | CADPS2   | 1296 | 1   | 2    | 0   | 1   | 0    | 0   |
| ENSP00000398599 | YWHAZ    | 245  | 4   | 5    | 5   | 5   | 7    | 1   |
| ENSP00000398932 | ATP6V1E1 | 203  | 2   | 2    | 2   | 4   | 1    | 3   |
| ENSP00000398973 | CKMT1A   | 148  | 1   | 1    | 0   | 2   | 0    | 0   |
| ENSP00000398976 | ALDOC    | 149  | 0.5 | 1    | 1   | 2   | 1    | 1   |
| ENSP00000398990 | YWHAQ    | 149  | 3.5 | 10.5 | 6.5 | 4.5 | 3    | 3   |
| ENSP00000399393 | BTN3A1   | 43   | 1   | 0    | 0   | 0   | 0    | 0   |
| ENSP00000399487 | ACTB     | 99   | 3   | 4    | 6   | 8   | 6    | 3   |
| ENSP00000399685 | SEPT5    | 322  | 2   | 10   | 6   | 1   | 6    | 2   |
| ENSP00000399741 | GNB1     | 163  | 1   | 1    | 2   | 1   | 1    | 0   |
| ENSP00000399904 | GNB2     | 251  | 25  | 35.5 | 35  | 21  | 24   | 18  |
| ENSP00000400022 | AP1B1    | 578  | 12  | 16   | 15  | 17  | 19   | 12  |
| ENSP00000400107 | RAB14    | 181  | 4   | 17   | 5   | 4   | 15   | 4   |
| ENSP00000400124 | ATP1A1   | 106  | 7   | 3    | 0   | 5   | 1    | 2   |
| ENSP00000400175 | RHOA     | 193  | 3   | 6.5  | 0   | 7   | 2    | 1   |
| ENSP00000400387 | CAMK2B   | 168  | 3   | 3    | 4   | 2   | 1    | 0   |
| ENSP00000400717 | GNA13    | 377  | 6.5 | 3    | 2.5 | 6   | 3.5  | 1.5 |
| ENSP00000400720 | SNAP25   | 93   | 9   | 20   | 13  | 4   | 9    | 6   |
| ENSP00000400923 | MX1      | 197  | 1   | 0    | 0   | 0   | 1    | 0   |
| ENSP00000401185 | GBAS     | 80   | 1   | 1    | 2   | 0   | 1    | 0   |
| ENSP00000401317 | TUBB     | 444  | 9   | 16   | 12  | 8   | 15.5 | 14  |
| ENSP00000401671 | ITPR1    | 2743 | 6   | 5    | 3   | 5   | 1    | 4   |
| ENSP00000401733 | GDI2     | 263  | 3   | 1    | 2   | 2   | 0    | 2   |
| ENSP00000401802 | PSMC6    | 403  | 1   | 1    | 0   | 1   | 0    | 1   |
| ENSP00000401873 | GNB2     | 296  | 10  | 12   | 11  | 10  | 9    | 5   |
| ENSP00000402033 | PDZD2    | 2839 | 1   | 1    | 0   | 0   | 0    | 0   |
| ENSP00000402051 | AP2M1    | 136  | 2   | 0    | 1   | 1   | 0    | 1   |
| ENSP00000402551 | OTUB1    | 271  | 4   | 9    | 6.5 | 3.5 | 7    | 1   |
| ENSP00000402836 | PPIH     | 144  | 1   | 3    | 0   | 2   | 0    | 0   |
| ENSP00000403175 | RPS18    | 152  | 1   | 2    | 0   | 1   | 4    | 1   |
| ENSP00000403335 | PLP1     | 122  | 6   | 13   | 7   | 10  | 9    | 11  |
| ENSP00000403349 | ALDH2    | 470  | 2   | 2    | 3   | 1   | 3    | 0   |
| ENSP00000403365 | PKM      | 516  | 12  | 3    | 11  | 10  | 9    | 12  |

|                 |            |      |      |      |      |    |    |      |
|-----------------|------------|------|------|------|------|----|----|------|
| ENSP00000403497 | PCDH1      | 1048 | 1    | 0    | 0    | 0  | 0  | 0    |
| ENSP00000403636 | SYNGAP1    | 1343 | 1    | 0    | 0    | 0  | 0  | 0    |
| ENSP00000403778 | RAC2       | 166  | 5    | 11   | 1    | 7  | 6  | 5    |
| ENSP00000404092 | SMC6       | 1091 | 1    | 0    | 1    | 0  | 0  | 0    |
| ENSP00000404100 | PAX6       | 436  | 1    | 0    | 0    | 0  | 0  | 0    |
| ENSP00000404327 | PCYOX1     | 129  | 2    | 3    | 3    | 3  | 1  | 1    |
| ENSP00000404506 | FSCN1      | 132  | 3    | 1    | 0    | 2  | 0  | 1    |
| ENSP00000404740 | TUBA4A     | 119  | 7    | 9    | 5    | 6  | 8  | 6    |
| ENSP00000404801 | MAST4      | 58   | 1    | 0    | 0    | 0  | 0  | 0    |
| ENSP00000405114 | ATP6V1B1   | 248  | 2    | 6    | 4.5  | 6  | 9  | 3    |
| ENSP00000405395 | CACNA2D1   | 309  | 2    | 0    | 0    | 1  | 0  | 0    |
| ENSP00000405417 | BCAP31     | 246  | 2    | 4    | 5    | 2  | 2  | 0    |
| ENSP00000405452 | PGK1       | 281  | 5    | 2    | 2    | 3  | 2  | 3    |
| ENSP00000405729 | CMTM1      | 169  | 1    | 0    | 0    | 0  | 0  | 0    |
| ENSP00000405750 | PLP1       | 277  | 11   | 28.5 | 18   | 11 | 13 | 8    |
| ENSP00000405767 | RAB11A     | 155  | 1    | 1    | 0    | 1  | 1  | 1    |
| ENSP00000405788 | TPO        | 864  | 1    | 0    | 0    | 0  | 0  | 0    |
| ENSP00000405812 | SLC4A8     | 1093 | 1    | 0    | 0    | 0  | 0  | 1    |
| ENSP00000406028 | ACTR1A     | 329  | 8    | 3    | 3    | 11 | 5  | 2    |
| ENSP00000406091 | DDR1       | 876  | 1    | 0    | 0    | 0  | 0  | 0    |
| ENSP00000406131 | CAMK2D     | 513  | 2    | 1    | 2    | 0  | 0  | 0    |
| ENSP00000406133 | SLC1A2     | 199  | 3    | 0    | 0    | 2  | 0  | 0    |
| ENSP00000406288 | CHD8       | 2302 | 1    | 0    | 0    | 0  | 0  | 0    |
| ENSP00000406473 | PDHA1      | 205  | 6    | 7    | 6    | 4  | 5  | 2    |
| ENSP00000406511 | NCDN       | 244  | 1    | 0    | 1    | 0  | 1  | 0    |
| ENSP00000406547 | SCAMP5     | 235  | 1    | 0    | 0    | 0  | 0  | 0    |
| ENSP00000406747 | YWHAH      | 162  | 1    | 5    | 5    | 4  | 4  | 2    |
| ENSP00000407723 | MAPRE2     | 315  | 2    | 2    | 2    | 6  | 1  | 0    |
| ENSP00000407851 | NIPSNAP1   | 221  | 1    | 1    | 3    | 0  | 1  | 0    |
| ENSP00000408402 | RHOA       | 129  | 1    | 6    | 0    | 2  | 1  | 1    |
| ENSP00000408405 | KCTD1      | 865  | 2    | 0    | 1    | 1  | 2  | 0    |
| ENSP00000408644 | SMC6       | 740  | 1    | 0    | 1    | 0  | 0  | 0    |
| ENSP00000408649 | MDH2       | 296  | 11   | 11.5 | 8    | 12 | 8  | 5    |
| ENSP00000408695 | PRKCA      | 672  | 2    | 3    | 4    | 4  | 4  | 5    |
| ENSP00000408838 | CALU       | 315  | 1    | 0    | 0    | 1  | 0  | 0    |
| ENSP00000408858 | PFKP       | 240  | 1    | 4    | 3    | 0  | 5  | 3    |
| ENSP00000409081 | AP2M1      | 433  | 1    | 2    | 2    | 3  | 4  | 1    |
| ENSP00000409221 | NTM        | 36   | 2    | 1    | 1    | 1  | 1  | 0    |
| ENSP00000409374 | CACNA2D1   | 280  | 1    | 1    | 0    | 0  | 1  | 0    |
| ENSP00000409420 | GPRASP1    | 1395 | 1    | 0    | 0    | 0  | 0  | 0    |
| ENSP00000409462 | TNK2       | 143  | 1    | 0    | 0    | 0  | 0  | 0    |
| ENSP00000409493 | OBSCN      | 7968 | 2    | 0    | 0    | 1  | 0  | 0    |
| ENSP00000409667 | SYNJ1      | 1612 | 4    | 9    | 3    | 5  | 12 | 9    |
| ENSP00000409899 | LY6H       | 140  | 2    | 5    | 0    | 3  | 2  | 0    |
| ENSP00000410071 | TUBB       | 444  | 3    | 5    | 3    | 2  | 3  | 2    |
| ENSP00000410073 | MDH1       | 222  | 2    | 3    | 2    | 4  | 2  | 3    |
| ENSP00000410411 | KMT2C      | 1524 | 1    | 0    | 0    | 0  | 0  | 0    |
| ENSP00000410626 | PHRF1      | 1648 | 1    | 0    | 1    | 1  | 0  | 0    |
| ENSP00000410680 | PHB        | 124  | 1    | 0    | 0    | 0  | 0  | 0    |
| ENSP00000410829 | TUBB       | 444  | 2    | 10   | 8    | 6  | 9  | 5    |
| ENSP00000411505 | GIGYF2     | 872  | 1    | 2    | 1    | 0  | 0  | 1    |
| ENSP00000411599 | PRNP       | 249  | 1    | 1    | 0    | 0  | 0  | 0    |
| ENSP00000411612 | ARPC2      | 165  | 1    | 0    | 1    | 0  | 0  | 0    |
| ENSP00000411705 | ATP1A2     | 714  | 17.5 | 33   | 19.5 | 14 | 28 | 23.5 |
| ENSP00000411885 | PLEKHH3    | 616  | 1    | 0    | 0    | 0  | 0  | 0    |
| ENSP00000411916 | ABAT       | 500  | 8    | 5    | 9    | 14 | 6  | 6    |
| ENSP00000411941 | RAB5A      | 201  | 1    | 5    | 5    | 1  | 5  | 2    |
| ENSP00000412284 | ARPC4-TLL3 | 181  | 3    | 10   | 0    | 1  | 4  | 3    |

|                 |               |      |    |      |     |    |     |    |
|-----------------|---------------|------|----|------|-----|----|-----|----|
| ENSP00000412439 | FKBPL         | 349  | 2  | 0    | 0   | 0  | 1   | 0  |
| ENSP00000412490 | POR           | 418  | 2  | 1    | 1   | 0  | 0   | 0  |
| ENSP00000412492 | SNAP91        | 907  | 4  | 1    | 2   | 4  | 0   | 0  |
| ENSP00000412701 | ARF5          | 150  | 1  | 1    | 0   | 1  | 1   | 0  |
| ENSP00000412883 | SACM1L        | 187  | 1  | 3    | 1   | 1  | 1   | 1  |
| ENSP00000413104 | CNP           | 144  | 1  | 1    | 1   | 0  | 1   | 0  |
| ENSP00000413122 | BCL6          | 650  | 2  | 3    | 2   | 8  | 1   | 1  |
| ENSP00000413135 | APOE          | 216  | 4  | 0    | 0   | 2  | 0   | 1  |
| ENSP00000413221 | ARPC3         | 99   | 1  | 4    | 0   | 1  | 3   | 3  |
| ENSP00000413227 | RALA          | 164  | 3  | 4    | 3   | 4  | 5   | 2  |
| ENSP00000413234 | AP2A2         | 939  | 1  | 4    | 5   | 2  | 10  | 0  |
| ENSP00000413255 | CKMT1B        | 417  | 3  | 1    | 0.5 | 0  | 1   | 1  |
| ENSP00000413294 | NEGR1         | 308  | 5  | 2    | 3   | 0  | 2   | 1  |
| ENSP00000413308 | CCT3          | 276  | 2  | 3    | 1   | 1  | 3   | 1  |
| ENSP00000413507 | SEPT7         | 384  | 1  | 1    | 1   | 0  | 0   | 1  |
| ENSP00000413649 | SYNJ1         | 695  | 12 | 13.5 | 0   | 10 | 16  | 13 |
| ENSP00000414150 | ERG           | 486  | 1  | 0    | 1   | 0  | 0   | 0  |
| ENSP00000414399 | AKR1B1        | 263  | 1  | 1    | 2   | 1  | 1   | 0  |
| ENSP00000414479 | TUBB          | 372  | 31 | 37   | 26  | 17 | 23  | 18 |
| ENSP00000414488 | SEPT5         | 304  | 1  | 0    | 0   | 0  | 0   | 0  |
| ENSP00000414532 | FLNB          | 2422 | 1  | 2    | 0   | 0  | 0   | 0  |
| ENSP00000415031 | NFASC         | 1165 | 3  | 0    | 1   | 4  | 2   | 0  |
| ENSP00000415067 | PPP2R1A       | 534  | 7  | 4    | 1   | 10 | 2   | 0  |
| ENSP00000415131 | DNM1L         | 710  | 1  | 0    | 1   | 0  | 1   | 0  |
| ENSP00000415284 | PRNP          | 217  | 1  | 1    | 0   | 0  | 1   | 0  |
| ENSP00000415370 | P2RX5         | 432  | 1  | 0    | 0   | 0  | 0   | 0  |
| ENSP00000415373 | APMAP         | 289  | 3  | 0    | 1   | 0  | 0   | 0  |
| ENSP00000415446 | PRPSAP2       | 176  | 1  | 0    | 0   | 0  | 0   | 0  |
| ENSP00000416028 | PSMD2         | 778  | 1  | 0    | 2   | 2  | 3   | 2  |
| ENSP00000416293 | SLC2A1        | 492  | 2  | 0    | 0   | 3  | 0   | 0  |
| ENSP00000416320 | NTM           | 346  | 1  | 0    | 0   | 1  | 0   | 1  |
| ENSP00000416330 | TGFBI         | 683  | 1  | 1    | 2   | 0  | 0   | 0  |
| ENSP00000416578 | NEB           | 8525 | 1  | 0    | 0   | 0  | 0   | 0  |
| ENSP00000416638 | RPL7A         | 191  | 2  | 3    | 4   | 3  | 0   | 1  |
| ENSP00000416651 | GNB1          | 107  | 2  | 3    | 2   | 0  | 5   | 4  |
| ENSP00000416745 | RPS3          | 103  | 1  | 1    | 2   | 1  | 0   | 0  |
| ENSP00000416929 | MDH2          | 231  | 5  | 1    | 1   | 1  | 1   | 0  |
| ENSP00000417000 | RER1          | 158  | 1  | 2    | 1   | 0  | 0   | 0  |
| ENSP00000417134 | TMEM236       | 351  | 1  | 0    | 0   | 1  | 0   | 0  |
| ENSP00000417155 | RAB7A         | 134  | 3  | 5    | 1   | 4  | 4   | 5  |
| ENSP00000417189 | RAB7A         | 98   | 1  | 2    | 0   | 0  | 2   | 2  |
| ENSP00000417240 | RPSAP58       | 295  | 3  | 5    | 6   | 6  | 2.5 | 3  |
| ENSP00000417267 | PDHB          | 341  | 1  | 0    | 0   | 0  | 0   | 0  |
| ENSP00000417284 | RP11-553A10.1 | 106  | 1  | 0    | 0   | 0  | 0   | 0  |
| ENSP00000417545 | ATP6V1A       | 184  | 3  | 3    | 4   | 4  | 7   | 11 |
| ENSP00000417606 | PARP12        | 173  | 1  | 0    | 0   | 0  | 0   | 0  |
| ENSP00000417668 | RAB7A         | 160  | 2  | 3    | 0   | 3  | 3   | 0  |
| ENSP00000417827 | CADPS         | 240  | 1  | 0    | 0   | 3  | 1   | 2  |
| ENSP00000417978 | RAB7A         | 150  | 9  | 11   | 4   | 12 | 10  | 9  |
| ENSP00000418235 | ARHGEF7       | 151  | 1  | 0    | 0   | 0  | 0   | 0  |
| ENSP00000418317 | PDCD10        | 212  | 1  | 2    | 0.5 | 0  | 0   | 0  |
| ENSP00000418506 | LSAMP         | 205  | 1  | 0    | 0   | 1  | 2   | 0  |
| ENSP00000418571 | NCEH1         | 408  | 1  | 2    | 1   | 0  | 0   | 1  |
| ENSP00000418700 | PLS1          | 629  | 3  | 1    | 0   | 2  | 1   | 1  |
| ENSP00000418799 | TUBAL3        | 406  | 7  | 27   | 19  | 8  | 16  | 12 |
| ENSP00000418809 | CAMKV         | 470  | 1  | 1    | 0   | 0  | 1   | 0  |
| ENSP00000418955 | RAB7A         | 116  | 4  | 12.5 | 2   | 0  | 9.5 | 5  |
| ENSP00000419000 | LSAMP         | 338  | 1  | 0    | 2   | 0  | 1   | 2  |



|                 |          |      |    |     |      |      |     |    |
|-----------------|----------|------|----|-----|------|------|-----|----|
| ENSP00000419225 | DNM1     | 851  | 35 | 56  | 60   | 48.5 | 82  | 61 |
| ENSP00000419227 | PSMD6    | 350  | 1  | 0   | 0    | 1    | 0   | 0  |
| ENSP00000419580 | PDHB     | 251  | 1  | 1   | 0    | 0    | 0   | 0  |
| ENSP00000419608 | AHCYL2   | 182  | 2  | 0   | 1    | 1    | 1   | 0  |
| ENSP00000419693 | GNB4     | 340  | 6  | 7   | 4    | 3    | 3   | 3  |
| ENSP00000419764 | IPO5     | 1099 | 1  | 0   | 0    | 0    | 1   | 4  |
| ENSP00000419879 | CDS2     | 445  | 2  | 2   | 0    | 2    | 0   | 1  |
| ENSP00000419904 | GPM6B    | 302  | 1  | 1   | 0    | 0    | 1   | 0  |
| ENSP00000419921 | GPM6B    | 184  | 5  | 7   | 8    | 2    | 5   | 4  |
| ENSP00000420044 | CADPS    | 178  | 2  | 2.5 | 1    | 2    | 2   | 2  |
| ENSP00000420045 | DNM1     | 864  | 2  | 6   | 4    | 2    | 3   | 6  |
| ENSP00000420213 | FLNB     | 2633 | 1  | 1   | 0    | 0    | 0   | 0  |
| ENSP00000420424 | PDCD10   | 146  | 1  | 1   | 0.5  | 0    | 0   | 0  |
| ENSP00000420839 | SEPT11   | 372  | 3  | 4   | 10   | 3    | 4   | 3  |
| ENSP00000420908 | SPOP     | 374  | 1  | 6   | 6    | 3    | 6   | 11 |
| ENSP00000420931 | LPHN3    | 1580 | 1  | 0   | 0    | 0    | 0   | 0  |
| ENSP00000421067 | ANK2     | 1863 | 2  | 0   | 0    | 2    | 3   | 0  |
| ENSP00000421396 | PPP2R2B  | 449  | 2  | 1   | 0    | 3    | 2   | 2  |
| ENSP00000421421 | ANXA5    | 163  | 1  | 0   | 0    | 0    | 0   | 0  |
| ENSP00000421578 | GPM6A    | 267  | 19 | 25  | 17.5 | 14.5 | 16  | 7  |
| ENSP00000421813 | CANX     | 107  | 3  | 0   | 1    | 3    | 0   | 0  |
| ENSP00000422473 | TMEM33   | 247  | 1  | 1   | 1    | 1    | 1   | 0  |
| ENSP00000422542 | UCHL1    | 223  | 1  | 4   | 5    | 1    | 4   | 3  |
| ENSP00000422781 | PPP3CA   | 289  | 2  | 1   | 1    | 2    | 1   | 0  |
| ENSP00000422853 | ANK2     | 966  | 5  | 0   | 1    | 4    | 7   | 1  |
| ENSP00000422896 | SEPT11   | 439  | 1  | 0   | 2    | 0    | 0   | 0  |
| ENSP00000422959 | GPM6A    | 218  | 1  | 8   | 2    | 2    | 0   | 1  |
| ENSP00000422990 | PPP3CA   | 423  | 2  | 5   | 9    | 3    | 4   | 0  |
| ENSP00000423098 | HSPA9    | 62   | 1  | 1   | 1    | 2    | 2   | 0  |
| ENSP00000423224 | APC      | 1135 | 1  | 0   | 0    | 0    | 0   | 0  |
| ENSP00000423264 | CKMT2    | 170  | 2  | 2   | 2    | 1    | 1   | 0  |
| ENSP00000423318 | CCT5     | 520  | 2  | 2.5 | 0    | 0    | 2   | 1  |
| ENSP00000423337 | WFS1     | 890  | 1  | 2   | 2    | 0    | 2   | 1  |
| ENSP00000423416 | MAP1B    | 569  | 2  | 1   | 3    | 0    | 2   | 1  |
| ENSP00000423444 | MAP1B    | 670  | 7  | 4   | 6    | 9    | 10  | 10 |
| ENSP00000423449 | SH3D19   | 767  | 1  | 0   | 0    | 0    | 0   | 0  |
| ENSP00000423497 | ENPP6    | 194  | 2  | 1   | 1    | 4    | 1   | 1  |
| ENSP00000423935 | TGFBI    | 65   | 1  | 0   | 0    | 0    | 0   | 0  |
| ENSP00000423984 | GPM6A    | 271  | 3  | 1   | 2    | 4    | 2   | 0  |
| ENSP00000424063 | CANX     | 592  | 60 | 34  | 39   | 48   | 38  | 28 |
| ENSP00000424103 | WFS1     | 252  | 2  | 0   | 1    | 1    | 1   | 0  |
| ENSP00000424106 | ANXA5    | 260  | 7  | 3   | 3    | 4    | 0.5 | 1  |
| ENSP00000424199 | ANXA5    | 220  | 1  | 0   | 0    | 0    | 0   | 0  |
| ENSP00000424387 | TARS     | 723  | 1  | 0   | 0    | 0    | 0   | 0  |
| ENSP00000424790 | NFKB1    | 968  | 1  | 0   | 0    | 0    | 0   | 0  |
| ENSP00000424987 | WDFY3    | 639  | 1  | 0   | 0    | 1    | 0   | 0  |
| ENSP00000425262 | SEPT11   | 126  | 1  | 0   | 2    | 1    | 0   | 0  |
| ENSP00000425299 | EIF2S1   | 315  | 1  | 0   | 0    | 0    | 2   | 0  |
| ENSP00000425598 | HSPA9    | 95   | 1  | 0   | 0    | 0    | 1   | 0  |
| ENSP00000426052 | CANX     | 78   | 3  | 3   | 2    | 4    | 2   | 2  |
| ENSP00000426096 | RAP1GDS1 | 147  | 1  | 0   | 1    | 0    | 0   | 0  |
| ENSP00000426528 | AMER2    | 671  | 1  | 1   | 1    | 1    | 0   | 1  |
| ENSP00000426589 | TGFBI    | 59   | 1  | 0   | 1    | 0    | 0   | 0  |
| ENSP00000426607 | CAMK2A   | 90   | 5  | 5   | 6    | 4    | 5   | 0  |
| ENSP00000426634 | UCHL1    | 58   | 1  | 0   | 0    | 0    | 0   | 1  |
| ENSP00000426915 | SMG7     | 1145 | 1  | 0   | 0    | 0    | 0   | 0  |
| ENSP00000427099 | C5orf28  | 113  | 1  | 3   | 0    | 2    | 1   | 11 |
| ENSP00000427135 | ANXA5    | 35   | 1  | 0   | 0    | 0    | 0   | 0  |

|                 |          |      |    |     |    |    |     |      |
|-----------------|----------|------|----|-----|----|----|-----|------|
| ENSP00000427203 | SLC1A3   | 101  | 3  | 1   | 2  | 1  | 0   | 1    |
| ENSP00000427305 | HSPA4L   | 531  | 1  | 0   | 0  | 1  | 3   | 0    |
| ENSP00000427835 | ATP6V1H  | 101  | 1  | 1   | 1  | 0  | 0   | 1    |
| ENSP00000427862 | UQCRB    | 161  | 1  | 0   | 0  | 0  | 0   | 0    |
| ENSP00000427954 | DPYSL2   | 170  | 5  | 9   | 2  | 5  | 7   | 6    |
| ENSP00000427985 | DPYSL2   | 536  | 79 | 94  | 78 | 87 | 125 | 95   |
| ENSP00000428009 | CYFIP2   | 1057 | 6  | 22  | 6  | 12 | 18  | 17.5 |
| ENSP00000428209 | UBE2V2   | 145  | 1  | 1   | 0  | 1  | 2   | 1    |
| ENSP00000428255 | ATP6V1H  | 48   | 2  | 1   | 1  | 0  | 0   | 1    |
| ENSP00000428333 | PCDHGA11 | 750  | 1  | 0   | 0  | 0  | 0   | 0    |
| ENSP00000428381 | YWHAZ    | 75   | 1  | 0   | 0  | 1  | 0   | 0    |
| ENSP00000428450 | TACC1    | 610  | 1  | 0   | 1  | 0  | 0   | 0    |
| ENSP00000428511 | SNAP91   | 877  | 1  | 0   | 0  | 0  | 0   | 0    |
| ENSP00000428775 | YWHAZ    | 125  | 6  | 7   | 5  | 13 | 6   | 4    |
| ENSP00000428845 | VDAC3    | 284  | 1  | 0   | 0  | 0  | 0   | 0    |
| ENSP00000428916 | ANXA6    | 156  | 1  | 0   | 0  | 2  | 1   | 0    |
| ENSP00000429041 | YWHAZ    | 137  | 2  | 1   | 1  | 2  | 2   | 0    |
| ENSP00000429301 | PGRMC2   | 247  | 1  | 2   | 0  | 0  | 1   | 0    |
| ENSP00000429419 | UBE2V2   | 105  | 1  | 2   | 0  | 1  | 2   | 1    |
| ENSP00000429466 | NCALD    | 152  | 2  | 4   | 0  | 3  | 0   | 0    |
| ENSP00000429701 | DNM3     | 639  | 18 | 17  | 16 | 24 | 21  | 20   |
| ENSP00000429947 | ATP6V1H  | 443  | 6  | 6   | 11 | 11 | 7   | 6    |
| ENSP00000429997 | SPIDR    | 209  | 1  | 0   | 0  | 0  | 0   | 0    |
| ENSP00000430055 | ENO3     | 283  | 1  | 0   | 0  | 4  | 0   | 1    |
| ENSP00000430219 | YWHAZ    | 51   | 5  | 3   | 4  | 3  | 1   | 4    |
| ENSP00000430282 | ATP6V1C1 | 382  | 1  | 1   | 2  | 2  | 0   | 4    |
| ENSP00000430636 | ENO3     | 391  | 15 | 25  | 21 | 30 | 33  | 21   |
| ENSP00000430682 | ATP6V1B2 | 199  | 9  | 6   | 9  | 10 | 10  | 10   |
| ENSP00000430758 | PPP2CB   | 124  | 1  | 1   | 2  | 1  | 2   | 1    |
| ENSP00000430817 | PPIA     | 105  | 2  | 3   | 0  | 2  | 0   | 0    |
| ENSP00000430848 | ZFHx4    | 3590 | 1  | 0   | 0  | 0  | 0   | 0    |
| ENSP00000430869 | PPP2CA   | 126  | 1  | 0   | 0  | 0  | 0   | 1    |
| ENSP00000430870 | PHYHIP   | 248  | 2  | 2   | 2  | 2  | 2   | 2    |
| ENSP00000431007 | TMEM30A  | 325  | 1  | 2   | 1  | 2  | 1   | 0    |
| ENSP00000431087 | ENO3     | 434  | 3  | 1.5 | 3  | 4  | 3.5 | 3.5  |
| ENSP00000431117 | DPYSL2   | 536  | 8  | 14  | 14 | 15 | 21  | 14   |
| ENSP00000431146 | PPP1CA   | 253  | 1  | 0   | 0  | 0  | 0   | 0    |
| ENSP00000431267 | MBP      | 32   | 4  | 2   | 0  | 4  | 1   | 0    |
| ENSP00000431364 | RAP1GAP  | 602  | 1  | 2   | 1  | 0  | 1   | 0    |
| ENSP00000431543 | CCT3     | 500  | 2  | 3   | 2  | 0  | 4   | 1    |
| ENSP00000431545 | PICALM   | 148  | 1  | 1   | 0  | 0  | 0   | 0    |
| ENSP00000431589 | RAB2A    | 181  | 1  | 0   | 0  | 1  | 1   | 0    |
| ENSP00000431630 | AP2A2    | 656  | 12 | 16  | 11 | 10 | 22  | 16   |
| ENSP00000431721 | RPS18    | 82   | 1  | 3   | 0  | 1  | 3   | 1    |
| ENSP00000431737 | RPS3     | 135  | 1  | 0   | 1  | 0  | 0   | 0    |
| ENSP00000432083 | HSPA8    | 646  | 3  | 2   | 6  | 5  | 7   | 1    |
| ENSP00000432112 | RDX      | 604  | 2  | 0   | 0  | 0  | 1   | 0    |
| ENSP00000432155 | CFL1     | 149  | 1  | 0   | 0  | 1  | 1   | 0    |
| ENSP00000432249 | CD81     | 209  | 1  | 0   | 0  | 1  | 0   | 0    |
| ENSP00000432542 | RPS3     | 91   | 1  | 4   | 2  | 0  | 0   | 1    |
| ENSP00000432568 | SPTBN2   | 2390 | 1  | 0   | 1  | 0  | 1   | 5    |
| ENSP00000432793 | TEKT2    | 96   | 1  | 0   | 0  | 0  | 0   | 0    |
| ENSP00000432884 | HSPA8    | 312  | 8  | 4   | 8  | 10 | 13  | 6    |
| ENSP00000432988 | MBP      | 98   | 1  | 2   | 2  | 3  | 0   | 0    |
| ENSP00000433034 | RPS2     | 218  | 1  | 1   | 0  | 0  | 0   | 0    |
| ENSP00000433155 | RPS3     | 117  | 1  | 0   | 0  | 0  | 0   | 1    |
| ENSP00000433287 | NPEPPS   | 915  | 2  | 0   | 0  | 2  | 3   | 2    |
| ENSP00000433308 | CFL1     | 79   | 1  | 3.5 | 0  | 0  | 0   | 2    |

|                 |               |       |     |     |     |     |     |     |
|-----------------|---------------|-------|-----|-----|-----|-----|-----|-----|
| ENSP00000433397 | HYOU1         | 937   | 2   | 3   | 0   | 1   | 0   | 2   |
| ENSP00000433464 | RPL8          | 257   | 1   | 2   | 0   | 0   | 0   | 2   |
| ENSP00000433821 | RPS3          | 243   | 1   | 1   | 1   | 0   | 1   | 1   |
| ENSP00000433910 | CFL1          | 149   | 5   | 24  | 2   | 8   | 15  | 14  |
| ENSP00000434272 | ATP1A4        | 517   | 2.5 | 1.5 | 2.5 | 0.5 | 3   | 2.5 |
| ENSP00000434286 | EIF3F         | 100   | 1   | 1   | 0   | 0   | 1   | 0   |
| ENSP00000434415 | HSPA8         | 171   | 4   | 5   | 3   | 8   | 5   | 3   |
| ENSP00000434466 | INTS4         | 963   | 1   | 0   | 0   | 0   | 0   | 0   |
| ENSP00000434565 | HSPA8         | 137   | 2   | 3   | 1   | 2   | 1   | 3   |
| ENSP00000434570 | SOGA3         | 947   | 1   | 0   | 0   | 2   | 0   | 2   |
| ENSP00000434586 | TTN           | 26926 | 2   | 4   | 2   | 2   | 3   | 2   |
| ENSP00000434599 | PPP3CA        | 132   | 1   | 1   | 0   | 0   | 1   | 0   |
| ENSP00000434744 | DNAJC5        | 167   | 13  | 18  | 10  | 11  | 11  | 6   |
| ENSP00000434851 | HSPA8         | 132   | 2   | 2   | 2   | 2   | 4   | 3   |
| ENSP00000435019 | HSPA8         | 150   | 2   | 1   | 1   | 2   | 4   | 1   |
| ENSP00000435154 | HSPA8         | 187   | 6   | 5   | 0   | 6   | 6   | 6   |
| ENSP00000435195 | RAB1B         | 169   | 2   | 4.5 | 0   | 1   | 2.5 | 4   |
| ENSP00000435306 | GANAB         | 852   | 9   | 3   | 2   | 15  | 4   | 1   |
| ENSP00000435376 | CUL5          | 780   | 1   | 0   | 2   | 0   | 3   | 1   |
| ENSP00000435406 | SLC1A2        | 91    | 1   | 2   | 1   | 0   | 0   | 0   |
| ENSP00000435777 | RPS13         | 151   | 2   | 7   | 0   | 1   | 2   | 1   |
| ENSP00000435786 | CMTM1         | 238   | 1   | 0   | 0   | 0   | 0   | 0   |
| ENSP00000435908 | HSPA8         | 223   | 1   | 1   | 1   | 1   | 1   | 1   |
| ENSP00000436029 | SLC1A2        | 199   | 10  | 15  | 10  | 9   | 7   | 6   |
| ENSP00000436208 | STIM1         | 540   | 1   | 0   | 0   | 0   | 0   | 0   |
| ENSP00000436369 | RP11-192H23.4 | 171   | 1   | 0   | 0   | 0   | 0   | 0   |
| ENSP00000436431 | CFL1          | 159   | 1   | 2   | 1   | 1   | 0   | 0   |
| ENSP00000436603 | IQGAP3        | 1588  | 8   | 7   | 4   | 5   | 6   | 3   |
| ENSP00000436654 | DPYS          | 54    | 2   | 0   | 1   | 3   | 0   | 2   |
| ENSP00000436978 | FAM203B       | 103   | 1   | 0   | 0   | 0   | 0   | 0   |
| ENSP00000437215 | RPL35         | 96    | 1   | 1   | 1   | 1   | 2   | 1   |
| ENSP00000437228 | AP2A2         | 125   | 1   | 0   | 0   | 0   | 0   | 0   |
| ENSP00000437577 | ATP1A3        | 1024  | 2   | 2   | 0   | 1   | 1   | 2   |
| ENSP00000437595 | M6PR          | 148   | 1   | 0   | 0   | 0   | 1   | 0   |
| ENSP00000437611 | PITPNM2       | 1349  | 1   | 0   | 0   | 0   | 0   | 0   |
| ENSP00000437822 | PGD           | 470   | 1   | 1   | 3   | 3   | 2   | 0   |
| ENSP00000437824 | CCT7          | 499   | 2   | 1   | 1   | 3   | 0   | 0   |
| ENSP00000437971 | RTN3          | 185   | 4.5 | 4   | 4   | 3.5 | 6   | 6   |
| ENSP00000438144 | MDH1          | 352   | 2   | 1   | 2   | 1   | 0   | 1   |
| ENSP00000438260 | PDIA3         | 485   | 19  | 16  | 17  | 16  | 12  | 16  |
| ENSP00000438507 | RP11-302B13.5 | 210   | 2   | 4   | 0   | 2   | 4   | 3   |
| ENSP00000438550 | PDHA1         | 397   | 3   | 5   | 6   | 0   | 1   | 1   |
| ENSP00000438687 | PIK3C2A       | 1306  | 2   | 2   | 1   | 1   | 1   | 0   |
| ENSP00000438715 | RDH12         | 316   | 1   | 0   | 1   | 0   | 0   | 0   |
| ENSP00000438778 | PDIA6         | 437   | 1   | 0   | 0   | 1   | 0   | 0   |
| ENSP00000438873 | ENO2          | 434   | 1   | 1   | 1   | 2   | 3   | 0   |
| ENSP00000438964 | KPNB1         | 731   | 1   | 0   | 0   | 1   | 0   | 0   |
| ENSP00000438966 | SEMA7A        | 652   | 1   | 1   | 2   | 1   | 0   | 1   |
| ENSP00000439170 | TBCE          | 578   | 1   | 0   | 0   | 0   | 0   | 0   |
| ENSP00000439189 | POTEE         | 1075  | 11  | 15  | 13  | 11  | 10  | 11  |
| ENSP00000439218 | ACOT7         | 265   | 2   | 4   | 2   | 3   | 2   | 3   |
| ENSP00000439245 | PCYT2         | 389   | 1   | 0   | 1   | 1   | 0   | 0   |
| ENSP00000439312 | WNT5B         | 359   | 1   | 1   | 0   | 0   | 0   | 0   |
| ENSP00000439418 | PHEX          | 652   | 1   | 0   | 0   | 0   | 0   | 0   |
| ENSP00000439528 | CADPS         | 212   | 1   | 0   | 0   | 0   | 0   | 0   |
| ENSP00000439568 | PPP1CA        | 169   | 1   | 0   | 0   | 1   | 1   | 1   |
| ENSP00000439870 | BFSP1         | 526   | 1   | 0   | 0   | 0   | 0   | 0   |
| ENSP00000439874 | ATP6V1A       | 584   | 10  | 8   | 9   | 11  | 16  | 8   |

|                 |          |      |    |    |     |     |    |     |
|-----------------|----------|------|----|----|-----|-----|----|-----|
| ENSP00000439966 | RAP1B    | 184  | 1  | 0  | 0   | 0   | 0  | 1   |
| ENSP00000440001 | SLC3A2   | 247  | 2  | 0  | 0   | 0   | 0  | 1   |
| ENSP00000440045 | ATP2A2   | 1042 | 3  | 2  | 0   | 0   | 1  | 0   |
| ENSP00000440211 | OTUB1    | 286  | 1  | 1  | 1.5 | 2.5 | 1  | 0   |
| ENSP00000440504 | KIAA1958 | 744  | 1  | 0  | 0   | 0   | 0  | 0   |
| ENSP00000440523 | ATIC     | 533  | 2  | 0  | 2   | 2   | 0  | 2   |
| ENSP00000440543 | CS       | 453  | 1  | 1  | 1   | 1   | 0  | 0   |
| ENSP00000440690 | VPS45    | 434  | 1  | 0  | 0   | 0   | 1  | 0   |
| ENSP00000440817 | BCAT1    | 385  | 1  | 1  | 0   | 1   | 0  | 0   |
| ENSP00000440842 | MAPK1    | 316  | 2  | 7  | 3   | 3   | 4  | 3   |
| ENSP00000440874 | RTN3     | 236  | 17 | 23 | 16  | 14  | 14 | 10  |
| ENSP00000441084 | INTS4    | 338  | 1  | 0  | 0   | 0   | 0  | 0   |
| ENSP00000441282 | ATP6V0D1 | 392  | 2  | 1  | 1   | 2   | 1  | 0   |
| ENSP00000441328 | OTUB1    | 241  | 4  | 8  | 6   | 4   | 7  | 1   |
| ENSP00000441767 | SLC17A7  | 548  | 1  | 1  | 1   | 0   | 0  | 0   |
| ENSP00000441770 | CLASP1   | 1255 | 1  | 0  | 0   | 1   | 0  | 0   |
| ENSP00000441819 | DPYSL3   | 196  | 1  | 2  | 2   | 3   | 6  | 2   |
| ENSP00000441847 | CCT2     | 530  | 6  | 5  | 8   | 6   | 7  | 4   |
| ENSP00000441931 | ANXA4    | 237  | 1  | 1  | 0   | 2   | 1  | 0   |
| ENSP00000442091 | EPB41L3  | 865  | 2  | 4  | 2   | 1   | 0  | 1   |
| ENSP00000442174 | CCT4     | 483  | 1  | 1  | 2   | 2   | 5  | 0   |
| ENSP00000442318 | CAND1    | 1230 | 13 | 17 | 1   | 20  | 24 | 26  |
| ENSP00000442348 | WNT5B    | 253  | 1  | 0  | 0   | 0   | 0  | 0   |
| ENSP00000442559 | PDE1B    | 495  | 1  | 0  | 0   | 0   | 0  | 0   |
| ENSP00000442665 | HADHB    | 452  | 1  | 0  | 0   | 0   | 1  | 0   |
| ENSP00000442680 | LDHB     | 102  | 7  | 5  | 4   | 10  | 2  | 3   |
| ENSP00000442730 | CCT8     | 475  | 2  | 0  | 0   | 1   | 1  | 2   |
| ENSP00000442789 | HSPA1B   | 550  | 2  | 2  | 3   | 3   | 9  | 1   |
| ENSP00000442820 | AHCY     | 404  | 2  | 6  | 5   | 4   | 2  | 1   |
| ENSP00000442821 | PGRMC1   | 143  | 1  | 1  | 0   | 1   | 0  | 2   |
| ENSP00000442849 | NAPG     | 230  | 4  | 2  | 3   | 1   | 0  | 0   |
| ENSP00000442864 | ANXA7    | 336  | 1  | 0  | 0   | 1   | 0  | 0   |
| ENSP00000443049 | POTEE    | 394  | 1  | 0  | 0   | 1   | 0  | 0   |
| ENSP00000443061 | CCT4     | 509  | 10 | 6  | 3   | 9   | 6  | 2   |
| ENSP00000443362 | LDHA     | 89   | 5  | 0  | 0   | 3   | 0  | 1   |
| ENSP00000443429 | LSAMP    | 358  | 3  | 1  | 1   | 4   | 2  | 1   |
| ENSP00000443449 | PGM1     | 365  | 3  | 3  | 5   | 3   | 5  | 2   |
| ENSP00000443493 | PRKCG    | 710  | 3  | 3  | 6   | 2   | 4  | 5   |
| ENSP00000443515 | SLC8A1   | 937  | 1  | 1  | 0   | 0   | 0  | 1   |
| ENSP00000443682 | XPNPEP3  | 288  | 1  | 0  | 0   | 0   | 1  | 0   |
| ENSP00000443683 | ST8SIA5  | 345  | 1  | 0  | 0   | 0   | 0  | 0   |
| ENSP00000443787 | PYGL     | 813  | 1  | 2  | 1   | 2   | 2  | 1   |
| ENSP00000443798 | RYR2     | 4951 | 1  | 6  | 2   | 1   | 3  | 3   |
| ENSP00000443994 | RAB35    | 185  | 5  | 8  | 5.5 | 9.5 | 8  | 5.5 |
| ENSP00000444003 | MTHFSD   | 382  | 1  | 0  | 0   | 0   | 0  | 0   |
| ENSP00000444042 | RAN      | 198  | 1  | 5  | 5   | 3   | 5  | 2   |
| ENSP00000444074 | PFKFB1   | 406  | 1  | 0  | 0   | 0   | 0  | 0   |
| ENSP00000444089 | CAND1    | 770  | 2  | 2  | 0   | 3   | 4  | 5   |
| ENSP00000444236 | SLC3A2   | 599  | 1  | 0  | 0   | 1   | 1  | 0   |
| ENSP00000444292 | LDHA     | 72   | 1  | 0  | 0   | 0   | 0  | 0   |
| ENSP00000444379 | CCT7     | 443  | 5  | 6  | 5   | 5   | 6  | 6   |
| ENSP00000444501 | SEPT7    | 235  | 1  | 1  | 2   | 1   | 2  | 1   |
| ENSP00000444596 | MYCBP2   | 4640 | 1  | 0  | 0   | 0   | 0  | 0   |
| ENSP00000444676 | ATP6V0A1 | 837  | 2  | 3  | 6   | 3   | 1  | 3   |
| ENSP00000444708 | PGK1     | 389  | 13 | 7  | 6   | 13  | 15 | 5   |
| ENSP00000444830 | RAP1B    | 142  | 1  | 0  | 0   | 1   | 1  | 1   |
| ENSP00000445257 | ACTR3    | 356  | 2  | 1  | 3   | 1   | 3  | 1   |
| ENSP00000445306 | ATP1A1   | 1023 | 1  | 0  | 0   | 0   | 0  | 0   |

|                 |               |      |    |       |      |      |      |     |
|-----------------|---------------|------|----|-------|------|------|------|-----|
| ENSP00000445330 | CORO1B        | 282  | 1  | 2     | 0    | 0    | 1    | 0   |
| ENSP00000445471 | CCT2          | 488  | 3  | 0     | 2    | 1    | 2    | 2   |
| ENSP00000445578 | GOT1          | 392  | 2  | 0     | 0    | 2    | 1    | 0   |
| ENSP00000446091 | SLC12A5       | 186  | 1  | 0     | 1    | 1    | 0    | 0   |
| ENSP00000446130 | PCBP2         | 301  | 5  | 8     | 8    | 5    | 6    | 2   |
| ENSP00000446489 | ATP5B         | 362  | 23 | 19    | 17   | 9    | 22   | 11  |
| ENSP00000446677 | ATP5B         | 284  | 3  | 0     | 1    | 1    | 1    | 3   |
| ENSP00000446748 | HSP90B1       | 48   | 6  | 1     | 2    | 4    | 4    | 4   |
| ENSP00000447006 | CNTN1         | 1018 | 15 | 11    | 2    | 9    | 5    | 10  |
| ENSP00000447040 | KRT8          | 289  | 2  | 8     | 7    | 3    | 1    | 1   |
| ENSP00000447068 | PCBP2         | 202  | 1  | 1     | 1    | 1    | 1    | 0   |
| ENSP00000447096 | ATP2B1        | 162  | 1  | 0     | 0    | 0    | 1    | 0   |
| ENSP00000447488 | LIN7A         | 233  | 1  | 0     | 0    | 0    | 0    | 0   |
| ENSP00000447571 | ATP5B         | 270  | 4  | 1     | 0    | 0    | 2    | 0   |
| ENSP00000447845 | DNM1L         | 172  | 1  | 0     | 0    | 0    | 0    | 0   |
| ENSP00000447860 | CNTN1         | 90   | 9  | 3     | 0    | 11   | 3    | 2   |
| ENSP00000448004 | CNTN1         | 627  | 10 | 6     | 0    | 6    | 6    | 5   |
| ENSP00000448104 | NTM           | 191  | 2  | 2     | 1    | 2    | 0    | 2   |
| ENSP00000448253 | PFKM          | 139  | 1  | 0     | 1    | 0    | 1    | 1   |
| ENSP00000448428 | ATP5B         | 133  | 3  | 3     | 3    | 2    | 2    | 2   |
| ENSP00000448437 | PPP1CC        | 270  | 2  | 1     | 1    | 0    | 1    | 0   |
| ENSP00000448648 | TUBA1B        | 49   | 6  | 11    | 4    | 6    | 11   | 3   |
| ENSP00000448653 | CNTN1         | 627  | 17 | 16    | 3    | 15   | 17   | 11  |
| ENSP00000448725 | TUBA1A        | 112  | 12 | 14    | 8    | 8    | 11   | 8   |
| ENSP00000448767 | KRT5          | 201  | 1  | 11    | 8    | 1    | 5    | 3   |
| ENSP00000449016 | TUBA1A        | 26   | 4  | 13    | 6    | 6    | 9    | 12  |
| ENSP00000449018 | ERP29         | 160  | 2  | 1     | 1    | 2    | 1    | 0   |
| ENSP00000449080 | CS            | 123  | 1  | 3     | 1    | 2    | 2    | 2   |
| ENSP00000449269 | PFKM          | 156  | 2  | 6     | 4    | 2    | 7    | 5   |
| ENSP00000449325 | TUBA1B        | 246  | 26 | 23    | 19   | 29   | 28   | 17  |
| ENSP00000449415 | SYT1          | 185  | 18 | 28    | 22   | 9    | 23   | 20  |
| ENSP00000449426 | PFKM          | 780  | 8  | 11    | 12   | 17   | 27   | 14  |
| ENSP00000449460 | TUBA1B        | 81   | 3  | 7     | 5    | 2    | 7    | 3   |
| ENSP00000449517 | CNTN1         | 57   | 3  | 4     | 1    | 3    | 3    | 2   |
| ENSP00000449748 | TUBA1B        | 75   | 8  | 21    | 11   | 9    | 19   | 12  |
| ENSP00000449762 | RAB5B         | 79   | 1  | 1     | 1    | 1    | 1    | 1   |
| ENSP00000449777 | RAB5C         | 91   | 3  | 2     | 1    | 1    | 3    | 0   |
| ENSP00000450238 | OSBPL8        | 721  | 2  | 1     | 1    | 0    | 0    | 0   |
| ENSP00000450268 | TUBA1A        | 219  | 9  | 28    | 24   | 12   | 15   | 17  |
| ENSP00000450297 | ATP5B         | 518  | 1  | 2     | 1    | 0    | 1    | 0   |
| ENSP00000450353 | RP11-162P23.2 | 261  | 1  | 0     | 1    | 0    | 0    | 0   |
| ENSP00000450407 | ATP2A2        | 46   | 4  | 2     | 3    | 5    | 1    | 4   |
| ENSP00000450412 | CNTN1         | 62   | 3  | 0     | 0    | 2    | 1    | 1   |
| ENSP00000450538 | TUBB3         | 189  | 4  | 10    | 11   | 3    | 6    | 9   |
| ENSP00000450674 | DYNC1H1       | 180  | 5  | 4     | 1    | 6    | 3    | 3   |
| ENSP00000450683 | NRXN3         | 1392 | 3  | 2     | 1    | 2    | 2    | 2   |
| ENSP00000450712 | HSP90AA1      | 174  | 11 | 10    | 14.5 | 9    | 20   | 9   |
| ENSP00000450822 | TUBB3         | 118  | 1  | 5     | 7    | 2    | 4    | 5   |
| ENSP00000450992 | SV2B          | 683  | 3  | 2     | 1    | 0    | 0    | 0   |
| ENSP00000451069 | CYP46A1       | 96   | 1  | 1     | 1    | 1    | 0    | 0   |
| ENSP00000451156 | PSMC6         | 262  | 1  | 1     | 0    | 0    | 0    | 1   |
| ENSP00000451276 | TUBB3         | 55   | 2  | 4.5   | 2.5  | 4    | 3.5  | 2.5 |
| ENSP00000451378 | TUBB3         | 148  | 7  | 13    | 10   | 6    | 13   | 8   |
| ENSP00000451426 | CKB           | 179  | 1  | 1     | 3    | 3    | 5    | 4   |
| ENSP00000451560 | TUBB3         | 797  | 6  | 11    | 8.5  | 4    | 11.5 | 8.5 |
| ENSP00000451564 | ATP6V1D       | 153  | 2  | 5     | 5    | 3    | 4    | 2   |
| ENSP00000451611 | CKB           | 128  | 5  | 1     | 1    | 8    | 2    | 0   |
| ENSP00000451617 | TUBB3         | 378  | 43 | 101.5 | 86.5 | 49.5 | 59.5 | 43  |

|                 |             |      |      |    |     |     |     |     |
|-----------------|-------------|------|------|----|-----|-----|-----|-----|
| ENSP00000451622 | LRP1        | 139  | 1    | 1  | 2   | 1   | 0   | 1   |
| ENSP00000451648 | NRXN3       | 1061 | 1    | 0  | 0   | 0   | 0   | 1   |
| ENSP00000451686 | CKB         | 90   | 5    | 4  | 1   | 3   | 3   | 3   |
| ENSP00000451754 | NRXN3       | 175  | 1    | 1  | 0   | 1   | 0   | 1   |
| ENSP00000451870 | TRAJ56      | 21   | 1    | 2  | 4   | 7   | 12  | 13  |
| ENSP00000452001 | TUBB3       | 51   | 5    | 8  | 5   | 3   | 8   | 5   |
| ENSP00000452166 | TUBB3       | 46   | 9    | 18 | 10  | 9   | 11  | 18  |
| ENSP00000452192 | ATP6V1D     | 179  | 1    | 1  | 1   | 1   | 2   | 1   |
| ENSP00000452506 | ATL1        | 99   | 1    | 0  | 0   | 0   | 0   | 0   |
| ENSP00000452754 | IDH3A       | 109  | 2    | 2  | 1   | 1   | 2   | 1   |
| ENSP00000452921 | ANXA2       | 176  | 4    | 5  | 4   | 4   | 4   | 0   |
| ENSP00000453084 | IDH3A       | 331  | 4    | 4  | 2   | 3   | 3   | 3   |
| ENSP00000453111 | RAB8B       | 48   | 1    | 2  | 0.5 | 2   | 0   | 0.5 |
| ENSP00000453222 | IDH3A       | 134  | 1    | 1  | 0   | 0   | 0   | 1   |
| ENSP00000453233 | CYFIP1      | 151  | 1    | 1  | 0   | 1   | 1   | 0   |
| ENSP00000453352 | CPNE6       | 226  | 1    | 0  | 0   | 0   | 0   | 0   |
| ENSP00000453480 | IDH3A       | 46   | 1    | 1  | 1   | 1   | 1   | 1   |
| ENSP00000453544 | C15orf57    | 203  | 1    | 0  | 0   | 0   | 0   | 0   |
| ENSP00000453566 | ANXA2       | 65   | 1    | 0  | 1   | 0   | 1   | 0   |
| ENSP00000453663 | ANXA2       | 149  | 1    | 1  | 0   | 2   | 1   | 0   |
| ENSP00000453747 | IDH3A       | 175  | 6    | 0  | 1   | 3   | 0   | 0   |
| ENSP00000453925 | ANXA2       | 79   | 3    | 5  | 4   | 3   | 4   | 4   |
| ENSP00000454365 | SEMA7A      | 80   | 1    | 0  | 1   | 0   | 0   | 1   |
| ENSP00000454435 | CDH13       | 713  | 2    | 2  | 3   | 1   | 2   | 2   |
| ENSP00000454453 | CDIPT       | 213  | 1    | 3  | 1   | 1   | 0   | 0   |
| ENSP00000454499 | ALDOA       | 140  | 1    | 4  | 4   | 3.5 | 3   | 1   |
| ENSP00000454611 | CNOT1       | 439  | 2    | 0  | 0   | 0   | 0   | 0   |
| ENSP00000454728 | GNAO1       | 128  | 37.5 | 58 | 42  | 25  | 41  | 25  |
| ENSP00000454755 | GDE1        | 102  | 1    | 0  | 0   | 0   | 0   | 0   |
| ENSP00000454861 | CTC-554D6.1 | 94   | 1    | 0  | 0   | 0   | 0   | 0   |
| ENSP00000454963 | ABAT        | 515  | 2    | 1  | 2   | 5   | 1   | 0   |
| ENSP00000454971 | GNAO1       | 94   | 1    | 0  | 0   | 0   | 0   | 1   |
| ENSP00000455313 | SCAMP5      | 243  | 3    | 2  | 0   | 0   | 2   | 0   |
| ENSP00000455447 | TRAPP2L     | 59   | 1    | 0  | 0   | 0   | 0   | 0   |
| ENSP00000455455 | ALDOA       | 278  | 1    | 6  | 3   | 2   | 3   | 3   |
| ENSP00000455502 | ABAT        | 117  | 1    | 2  | 1   | 0   | 2   | 2   |
| ENSP00000455507 | OBSCN       | 8923 | 3    | 1  | 2   | 2   | 2   | 0   |
| ENSP00000455671 | NPTN        | 152  | 2    | 5  | 6   | 0   | 1   | 1   |
| ENSP00000455724 | ALDOA       | 364  | 5    | 12 | 10  | 11  | 16  | 18  |
| ENSP00000455749 | APRT        | 148  | 1    | 1  | 0   | 0   | 0   | 0   |
| ENSP00000455774 | GNAO1       | 83   | 9    | 9  | 9   | 6   | 9   | 7   |
| ENSP00000455899 | STX1B       | 277  | 33   | 60 | 42  | 25  | 36  | 27  |
| ENSP00000455901 | PKM         | 531  | 46   | 57 | 48  | 51  | 86  | 64  |
| ENSP00000456033 | NPTN        | 308  | 1    | 0  | 0   | 3   | 1   | 0   |
| ENSP00000456098 | ALDOA       | 130  | 4    | 2  | 3   | 2   | 3   | 7   |
| ENSP00000456162 | ATXN2L      | 401  | 1    | 0  | 0   | 1   | 0   | 0   |
| ENSP00000456180 | IQSEC3      | 1182 | 1    | 0  | 0   | 0   | 0   | 0   |
| ENSP00000456259 | SMG1        | 3551 | 1    | 0  | 0   | 0   | 0   | 0   |
| ENSP00000456270 | RPL7A       | 191  | 2    | 1  | 0   | 1   | 0   | 1   |
| ENSP00000456295 | GDE1        | 129  | 1    | 0  | 0   | 0   | 0   | 0   |
| ENSP00000456349 | NPTN        | 278  | 1    | 2  | 0   | 2   | 0   | 0   |
| ENSP00000456638 | RAB11A      | 198  | 1    | 4  | 2   | 2   | 3   | 2   |
| ENSP00000456695 | ATP6V0D1    | 115  | 1    | 0  | 0   | 0   | 1   | 0   |
| ENSP00000456984 | PKM         | 151  | 8    | 4  | 3   | 6   | 10  | 5   |
| ENSP00000457028 | NPTN        | 394  | 3    | 4  | 3   | 2   | 2   | 0   |
| ENSP00000457067 | STX1B       | 204  | 1    | 4  | 7   | 5   | 5.5 | 6   |
| ENSP00000457238 | GNAO1       | 110  | 5    | 5  | 8   | 6   | 8   | 5   |
| ENSP00000457253 | PKM         | 485  | 8    | 5  | 5   | 7   | 9   | 16  |

|                 |          |      |     |     |     |     |     |     |
|-----------------|----------|------|-----|-----|-----|-----|-----|-----|
| ENSP00000457420 | PKM      | 82   | 6   | 13  | 11  | 8   | 10  | 8   |
| ENSP00000457514 | ALDOA    | 204  | 0.5 | 3   | 2   | 0   | 3   | 2   |
| ENSP00000457540 | RAB5C    | 91   | 4   | 3   | 3   | 1   | 5   | 2   |
| ENSP00000457610 | TUBB8    | 410  | 7   | 8   | 4   | 8   | 11  | 5   |
| ENSP00000457766 | CDIPT    | 157  | 1   | 5   | 0   | 2   | 2   | 0   |
| ENSP00000457794 | MTHFSD   | 89   | 1   | 0   | 0   | 0   | 0   | 0   |
| ENSP00000457980 | PRKCB    | 130  | 2   | 1   | 2   | 1   | 3   | 4   |
| ENSP00000458035 | ATP2A1   | 113  | 3   | 2   | 0   | 2   | 2   | 0   |
| ENSP00000458085 | FHOD1    | 157  | 1   | 0   | 0   | 0   | 0   | 0   |
| ENSP00000458149 | CAMP     | 170  | 1   | 0   | 0   | 0   | 0   | 0   |
| ENSP00000458162 | ACTG1    | 375  | 1   | 5   | 1   | 0   | 3   | 1   |
| ENSP00000458221 | NSF      | 739  | 7   | 14  | 9   | 9   | 17  | 3   |
| ENSP00000458238 | PI4KA    | 2044 | 1   | 0   | 0   | 0   | 0   | 0   |
| ENSP00000458310 | NLRP7    | 1065 | 1   | 0   | 0   | 0   | 0   | 0   |
| ENSP00000458474 | HSPA12A  | 675  | 2   | 2   | 3   | 8   | 7   | 1   |
| ENSP00000459093 | HYOU1    | 653  | 3   | 3   | 2   | 2   | 2   | 8   |
| ENSP00000459119 | ACTG1    | 214  | 120 | 187 | 158 | 123 | 160 | 110 |
| ENSP00000459145 | ATP1B2   | 166  | 1   | 2   | 1   | 0   | 1   | 0   |
| ENSP00000459354 | TRAP1    | 215  | 1   | 1.5 | 2   | 2   | 1   | 1   |
| ENSP00000459386 | GNAI2    | 339  | 15  | 24  | 14  | 13  | 15  | 10  |
| ENSP00000459444 | STX1A    | 251  | 6   | 6   | 2   | 2   | 3   | 2   |
| ENSP00000459531 | STX1A    | 288  | 3   | 2   | 1   | 1   | 1   | 2   |
| ENSP00000459646 | NSF      | 136  | 8   | 14  | 8   | 11  | 12  | 10  |
| ENSP00000459836 | PCYT2    | 286  | 1   | 0   | 1   | 1   | 0   | 0   |
| ENSP00000459838 | PPP2R1B  | 667  | 2   | 4   | 2   | 2   | 5   | 2   |
| ENSP00000459841 | LPHN3    | 1299 | 1   | 0   | 0   | 0   | 0   | 0   |
| ENSP00000459911 | MDH2     | 338  | 4   | 2   | 4   | 6   | 2   | 0   |
| ENSP00000459932 | NCAM1    | 858  | 1   | 1   | 1   | 1   | 1   | 1   |
| ENSP00000460126 | CRYM     | 241  | 1   | 0   | 0   | 1   | 1   | 2   |
| ENSP00000460130 | HGS      | 110  | 1   | 0   | 0   | 0   | 0   | 0   |
| ENSP00000460464 | ACTG1    | 214  | 16  | 13  | 10  | 16  | 12  | 4   |
| ENSP00000460499 | ATP1B2   | 172  | 4   | 4   | 4   | 4   | 4   | 1   |
| ENSP00000460598 | PKMYT1   | 215  | 1   | 1   | 0   | 0   | 5   | 0   |
| ENSP00000460712 | YWHAE    | 107  | 1   | 1   | 0   | 1   | 0   | 3   |
| ENSP00000460810 | MDH2     | 296  | 2   | 0   | 1   | 1   | 1   | 2   |
| ENSP00000460932 | ATP2B3   | 1154 | 25  | 42  | 25  | 15  | 26  | 23  |
| ENSP00000460989 | DDX5     | 614  | 2   | 2   | 3   | 3   | 4   | 0   |
| ENSP00000461407 | ACTG1    | 241  | 10  | 16  | 10  | 11  | 7   | 7   |
| ENSP00000461619 | MBOAT7   | 123  | 1   | 0   | 0   | 0   | 0   | 0   |
| ENSP00000461762 | YWHAE    | 233  | 5   | 7   | 7   | 12  | 5   | 5   |
| ENSP00000461857 | KIF5C    | 957  | 2   | 1   | 0   | 3   | 4   | 2   |
| ENSP00000461904 | CRYM     | 140  | 1   | 0   | 0   | 0   | 0   | 0   |
| ENSP00000462223 | MBP      | 304  | 25  | 37  | 14  | 28  | 28  | 18  |
| ENSP00000462421 | RAC3     | 130  | 3   | 5   | 0   | 3   | 6   | 6   |
| ENSP00000462548 | RIOK3    | 516  | 2   | 1   | 0   | 1   | 0   | 0   |
| ENSP00000462550 | TRAPPC8  | 926  | 1   | 0   | 0   | 0   | 0   | 0   |
| ENSP00000462571 | EIF4A2   | 109  | 1   | 0   | 1   | 0   | 0   | 1   |
| ENSP00000462597 | AQP4     | 301  | 2   | 0   | 0   | 1   | 0   | 0   |
| ENSP00000462780 | MBP      | 60   | 1   | 4   | 0   | 3   | 4   | 4   |
| ENSP00000462783 | EPB41L3  | 147  | 5   | 1   | 1   | 3   | 1   | 0   |
| ENSP00000462904 | EIF4A1   | 257  | 4   | 4   | 2   | 2   | 6   | 4   |
| ENSP00000462938 | RPL19    | 194  | 2   | 1   | 1   | 1   | 2   | 1   |
| ENSP00000463016 | SV2A     | 742  | 15  | 9   | 11  | 15  | 12  | 9   |
| ENSP00000463018 | NAPG     | 167  | 1   | 0   | 0   | 0   | 0   | 0   |
| ENSP00000463066 | KPNB1    | 690  | 1   | 3   | 3   | 0   | 7   | 3   |
| ENSP00000463118 | ALDOC    | 122  | 1   | 2   | 3   | 4   | 4   | 2   |
| ENSP00000463328 | ATP6V0D1 | 232  | 17  | 14  | 9   | 16  | 10  | 2   |
| ENSP00000463393 | SEC22B   | 215  | 2   | 4   | 4   | 0   | 3   | 0   |

|                 |               |      |    |     |    |      |    |    |
|-----------------|---------------|------|----|-----|----|------|----|----|
| ENSP00000463503 | FLOT2         | 428  | 4  | 2   | 0  | 1    | 0  | 0  |
| ENSP00000463916 | VPS45         | 570  | 1  | 0   | 0  | 0    | 0  | 0  |
| ENSP00000463985 | RPL19         | 193  | 1  | 1   | 0  | 1    | 1  | 0  |
| ENSP00000464042 | KPNB1         | 148  | 1  | 0   | 1  | 3    | 1  | 1  |
| ENSP00000464083 | AC242842.1    | 164  | 1  | 6   | 0  | 0    | 0  | 0  |
| ENSP00000464093 | SCRN2         | 180  | 1  | 0   | 0  | 0    | 0  | 0  |
| ENSP00000464261 | KCTD1         | 260  | 2  | 0   | 0  | 1    | 1  | 0  |
| ENSP00000464496 | NAPG          | 18   | 1  | 0   | 0  | 1    | 0  | 0  |
| ENSP00000465076 | ROGDI         | 217  | 1  | 2   | 1  | 1    | 0  | 1  |
| ENSP00000465105 | CALR          | 247  | 2  | 0   | 0  | 2    | 0  | 2  |
| ENSP00000465113 | NCAM1         | 160  | 1  | 0   | 0  | 0    | 0  | 0  |
| ENSP00000465154 | NCAM1         | 364  | 11 | 11  | 7  | 11   | 8  | 10 |
| ENSP00000465200 | CLTC          | 222  | 3  | 2   | 2  | 5    | 3  | 2  |
| ENSP00000465477 | ATP5A1        | 503  | 4  | 11  | 14 | 2.5  | 5  | 6  |
| ENSP00000465478 | ACACA         | 235  | 1  | 0   | 0  | 0    | 0  | 0  |
| ENSP00000465489 | PRKCSH        | 525  | 1  | 0   | 1  | 0    | 0  | 0  |
| ENSP00000465623 | ALDOC         | 135  | 7  | 10  | 6  | 3    | 5  | 3  |
| ENSP00000465819 | FLOT2         | 249  | 2  | 0   | 0  | 1    | 0  | 0  |
| ENSP00000465820 | VAMP3         | 72   | 3  | 8   | 3  | 7    | 6  | 8  |
| ENSP00000465869 | NCAM1         | 135  | 1  | 1   | 1  | 1    | 1  | 0  |
| ENSP00000466290 | ATP6V0A1      | 93   | 5  | 1   | 0  | 1    | 0  | 1  |
| ENSP00000466295 | NCAM1         | 357  | 2  | 3   | 2  | 2    | 2  | 4  |
| ENSP00000466324 | YWHAE         | 115  | 1  | 0   | 2  | 1    | 1  | 0  |
| ENSP00000466328 | ATP6V0A1      | 130  | 4  | 4   | 2  | 4    | 1  | 5  |
| ENSP00000466406 | ENO1          | 195  | 13 | 14  | 14 | 13   | 14 | 16 |
| ENSP00000466696 | NCAM1         | 733  | 22 | 25  | 13 | 14   | 18 | 18 |
| ENSP00000467037 | ATP5A1        | 531  | 1  | 3   | 4  | 0    | 2  | 1  |
| ENSP00000467172 | TBCB          | 169  | 1  | 0   | 0  | 0    | 0  | 0  |
| ENSP00000467255 | GAPDHS        | 179  | 2  | 2   | 7  | 1    | 5  | 3  |
| ENSP00000467270 | ENO3          | 28   | 1  | 0   | 1  | 1    | 1  | 1  |
| ENSP00000467373 | ATP6V0A1      | 198  | 9  | 3   | 1  | 6    | 4  | 1  |
| ENSP00000467399 | VAMP2         | 113  | 16 | 31  | 12 | 15   | 26 | 27 |
| ENSP00000467451 | NCAM1         | 133  | 1  | 1   | 0  | 0    | 1  | 0  |
| ENSP00000467501 | RAB8A         | 207  | 1  | 1   | 0  | 0    | 1  | 0  |
| ENSP00000467515 | NCAM1         | 725  | 2  | 2   | 2  | 1    | 2  | 4  |
| ENSP00000468198 | CNP           | 164  | 1  | 0   | 0  | 1    | 1  | 0  |
| ENSP00000468417 | DIRAS1        | 198  | 1  | 0   | 0  | 0    | 0  | 0  |
| ENSP00000468420 | HSPA12A       | 136  | 1  | 3   | 2  | 1    | 4  | 2  |
| ENSP00000468571 | TUBB6         | 116  | 7  | 11  | 5  | 6    | 5  | 3  |
| ENSP00000468777 | TUBB6         | 338  | 1  | 10  | 9  | 4    | 8  | 6  |
| ENSP00000468854 | ATP2B3        | 1220 | 2  | 2   | 1  | 1    | 0  | 3  |
| ENSP00000468904 | MAPRE2        | 127  | 1  | 0   | 0  | 0    | 0  | 0  |
| ENSP00000468923 | AC040977.1    | 174  | 1  | 0   | 0  | 0    | 0  | 0  |
| ENSP00000468946 | CLTCL1        | 1640 | 11 | 6   | 6  | 7    | 5  | 5  |
| ENSP00000468957 | RPS16         | 50   | 1  | 3   | 0  | 1    | 1  | 1  |
| ENSP00000469129 | ATP1A3        | 178  | 47 | 62  | 48 | 49.5 | 43 | 45 |
| ENSP00000469550 | L1CAM         | 1248 | 1  | 0   | 0  | 0    | 2  | 0  |
| ENSP00000469660 | TUBB4A        | 107  | 2  | 5   | 6  | 2    | 7  | 3  |
| ENSP00000469966 | TPI1          | 167  | 2  | 0   | 1  | 1    | 1  | 1  |
| ENSP00000470087 | AC006486.9    | 167  | 1  | 1   | 0  | 0    | 2  | 0  |
| ENSP00000470102 | ACTG1         | 375  | 38 | 99  | 86 | 46   | 87 | 74 |
| ENSP00000470233 | CAPN12        | 179  | 1  | 0   | 0  | 1    | 0  | 0  |
| ENSP00000470256 | DKFZP434E1119 | 150  | 1  | 0   | 0  | 0    | 0  | 0  |
| ENSP00000470338 | SLC17A7       | 493  | 8  | 3   | 3  | 5    | 4  | 3  |
| ENSP00000470388 | USP5          | 835  | 2  | 3.5 | 5  | 4    | 7  | 4  |
| ENSP00000470571 | SYN           | 313  | 18 | 14  | 11 | 13   | 10 | 7  |
| ENSP00000470627 | TUBB4A        | 157  | 6  | 6   | 9  | 9    | 3  | 5  |
| ENSP00000470642 | PGAM4         | 254  | 4  | 7   | 8  | 4    | 8  | 7  |



|                  |          |      |       |       |     |       |      |       |
|------------------|----------|------|-------|-------|-----|-------|------|-------|
| ENSP00000470907  | ENO2     | 103  | 3     | 2     | 0   | 1     | 4    | 3     |
| ENSP00000470986  | PGK1     | 389  | 33    | 54    | 45  | 36    | 51   | 40    |
| ENSP00000471186  | GDI1     | 447  | 3     | 1     | 1   | 2     | 1    | 1     |
| ENSP00000471425  | IRGC     | 275  | 2     | 5     | 3   | 2     | 4    | 2     |
| ENSP00000471490  | ENO2     | 434  | 4     | 9     | 6   | 12    | 12   | 5     |
| ENSP00000471503  | TUBB4A   | 103  | 1     | 5     | 3   | 1     | 4    | 2     |
| ENSP00000471510  | CAPN12   | 93   | 1     | 0     | 0   | 0     | 0    | 0     |
| ENSP00000471581  | ATP1A3   | 983  | 192.5 | 293.5 | 203 | 154.5 | 222  | 184.5 |
| ENSP00000471921  | SPIB     | 262  | 1     | 0     | 0   | 0     | 0    | 0     |
| ENSP00000472079  | USP5     | 858  | 1     | 1     | 1   | 1     | 3    | 1     |
| ENSP00000472219  | ZNF446   | 399  | 1     | 0     | 0   | 1     | 0    | 0     |
| ENSP00000472335  | RAB3A    | 115  | 7     | 15.5  | 7   | 12    | 13.5 | 11    |
| ENSP00000472375  | TUBB4A   | 167  | 4     | 2     | 1   | 3     | 0    | 0     |
| ENSP00000472379  | GNB3     | 232  | 4     | 5     | 5   | 5     | 2    | 2     |
| ENSP00000472481  | TUBB4A   | 155  | 18    | 24    | 22  | 11    | 24   | 24    |
| ENSP00000472697  | TECR     | 153  | 1     | 0     | 0   | 0     | 1    | 0     |
| ENSP00000472957  | TECR     | 150  | 1     | 0     | 0   | 0     | 0    | 0     |
| ENSP00000472985  | RPS5     | 204  | 1     | 4     | 1   | 0     | 5    | 3     |
| ENSP00000473036  | PNMAL2   | 635  | 1     | 0     | 0   | 0     | 0    | 0     |
| ENSP00000473053  | ACTG1    | 198  | 7     | 6     | 11  | 8     | 8    | 7     |
| ENSP00000473186  | SYP      | 313  | 4     | 0     | 1   | 3     | 0    | 2     |
| ENSP00000473334  | ACTR1A   | 332  | 5     | 1     | 1   | 3     | 2    | 1     |
| ENSP00000473474  | SDR42E2  | 388  | 0.5   | 0     | 1   | 0     | 0    | 0     |
| ENSP00000473821  | DNAJC6   | 516  | 1     | 1     | 0   | 0     | 0    | 0     |
| ENSP00000474569  | UBA1     | 1058 | 9     | 17    | 3   | 6     | 15   | 11    |
| ENSP00000474757  | UBA1     | 1058 | 7     | 5     | 1   | 4     | 10   | 5     |
| ENSP00000475018  | AP2B1    | 913  | 16    | 9     | 7   | 20    | 15   | 11    |
| ENSP00000475260  | TPI1     | 113  | 2     | 2     | 2   | 1     | 3    | 0     |
| ENSP00000475548  | ENO2     | 73   | 1     | 1     | 1   | 4     | 2    | 2     |
| ENSP00000476010  | PGRMC2   | 91   | 1     | 1     | 1   | 1     | 1    | 1     |
| ENSP00000476032  | TPI1     | 167  | 7     | 14    | 11  | 10    | 15   | 8     |
| ENSP00000476090  | BASP1    | 45   | 7     | 6     | 6   | 3     | 5    | 0     |
| ENSP00000476193  | ESD      | 120  | 1     | 0     | 0   | 0     | 0    | 0     |
| ENSP00000476311  | PFKP     | 118  | 1     | 0     | 0   | 0     | 2    | 1     |
| ENSP00000476532  | ARHGEF2  | 83   | 1     | 0     | 0   | 0     | 0    | 0     |
| ENSP00000476641  | ATP1A3   | 1226 | 2     | 2     | 6   | 1     | 2    | 5     |
| ENSP00000476705  | ATP1A3   | 1013 | 86.5  | 101   | 66  | 71.5  | 82.5 | 54.5  |
| ENSP00000476707  | GDI2     | 130  | 2     | 1     | 0   | 5     | 2    | 1     |
| ENSP00000476711  | SLC25A4  | 208  | 1     | 1     | 0   | 0     | 0    | 0     |
| ENSP00000476744  | SPIDR    | 209  | 1     | 0     | 0   | 0     | 0    | 0     |
| ENSP00000477015  | ATP1B1   | 130  | 15    | 7     | 8   | 11    | 6    | 6     |
| ENSP00000477141  | FRRS1L   | 344  | 2     | 4     | 4   | 1     | 2    | 0     |
| ENSP00000477245  | EPRS     | 968  | 1     | 0     | 0   | 1     | 0    | 2     |
| ENSP00000477306  | TUBA8    | 275  | 16    | 22    | 25  | 23    | 22   | 22    |
| ENSP00000001008  | FKBP4    | 459  | 0     | 2     | 2   | 0     | 0    | 0     |
| ENSP00000007722  | ITGA3    | 1066 | 0     | 1     | 0   | 0     | 0    | 0     |
| ENSP00000009589  | RPS20    | 119  | 0     | 5     | 1   | 0     | 2    | 2     |
| ENSP00000012443  | PPP5C    | 499  | 0     | 1     | 0   | 0     | 0    | 0     |
| ENSP00000016946  | RGPD5    | 1765 | 0     | 1     | 0   | 0     | 0    | 0     |
| ENSP000000084795 | RPL18    | 190  | 0     | 3     | 0   | 1     | 0    | 1     |
| ENSP00000156084  | OTUD5    | 571  | 0     | 1     | 0   | 0     | 0    | 0     |
| ENSP00000168216  | HSD17B10 | 261  | 0     | 1     | 1   | 0     | 1    | 0     |
| ENSP00000173527  | ISOC1    | 298  | 0     | 1     | 0   | 0     | 0    | 0     |
| ENSP00000179882  | STXBP5   | 806  | 0     | 1     | 0   | 1     | 0    | 0     |
| ENSP00000188376  | SLC25A3  | 361  | 0     | 3     | 0   | 2     | 1    | 1     |
| ENSP00000202773  | RPL6     | 288  | 0     | 1     | 1   | 0     | 1    | 0     |
| ENSP00000211402  | VARS     | 1264 | 0     | 2     | 1   | 0     | 0    | 1     |
| ENSP00000212015  | SIRT1    | 747  | 0     | 1     | 0   | 0     | 0    | 0     |

|                 |           |      |   |     |   |   |     |   |
|-----------------|-----------|------|---|-----|---|---|-----|---|
| ENSP00000215754 | MIF       | 115  | 0 | 1   | 0 | 0 | 0   | 0 |
| ENSP00000216378 | CDKL1     | 276  | 0 | 1   | 0 | 0 | 0   | 0 |
| ENSP00000217515 | TXNL1     | 289  | 0 | 1   | 0 | 0 | 1   | 0 |
| ENSP00000217901 | IDH3G     | 393  | 0 | 1   | 1 | 0 | 0   | 0 |
| ENSP00000218364 | HTATSF1   | 755  | 0 | 1   | 0 | 1 | 0   | 0 |
| ENSP00000219150 | CORO1A    | 461  | 0 | 2   | 1 | 1 | 1   | 0 |
| ENSP00000219789 | CDIPT     | 213  | 0 | 3   | 0 | 0 | 0   | 0 |
| ENSP00000221403 | DHDH      | 334  | 0 | 1   | 0 | 0 | 0   | 0 |
| ENSP00000221740 | CASP14    | 242  | 0 | 1   | 0 | 0 | 0   | 0 |
| ENSP00000221742 | SLC1A6    | 564  | 0 | 1   | 1 | 0 | 0   | 1 |
| ENSP00000221975 | RPS19     | 71   | 0 | 2   | 0 | 1 | 0   | 0 |
| ENSP00000222247 | RPL18A    | 176  | 0 | 2   | 0 | 0 | 1   | 0 |
| ENSP00000225174 | PPIF      | 207  | 0 | 3   | 0 | 0 | 0   | 0 |
| ENSP00000225655 | PFN1      | 140  | 0 | 3   | 3 | 0 | 1   | 4 |
| ENSP00000225719 | CPD       | 1380 | 0 | 1   | 0 | 0 | 0   | 1 |
| ENSP00000226004 | DUSP3     | 185  | 0 | 3   | 0 | 0 | 0   | 0 |
| ENSP00000228682 | GLI1      | 1106 | 0 | 1   | 0 | 0 | 1   | 0 |
| ENSP00000228929 | HIST2H2AC | 129  | 0 | 2   | 2 | 1 | 2   | 1 |
| ENSP00000229329 | CMAS      | 434  | 0 | 1   | 0 | 0 | 0   | 0 |
| ENSP00000230085 | SNX3      | 162  | 0 | 2   | 0 | 0 | 1   | 0 |
| ENSP00000231487 | SKP1      | 163  | 0 | 1   | 0 | 0 | 0   | 0 |
| ENSP00000232461 | GNAT1     | 350  | 0 | 1   | 1 | 1 | 0   | 0 |
| ENSP00000232496 | TUSC2     | 110  | 0 | 1   | 0 | 0 | 0   | 0 |
| ENSP00000233121 | MAPRE3    | 281  | 0 | 12  | 1 | 2 | 3   | 3 |
| ENSP00000233468 | SF3B14    | 125  | 0 | 1   | 0 | 0 | 0   | 1 |
| ENSP00000234038 | PPP1R7    | 360  | 0 | 1   | 0 | 1 | 1   | 0 |
| ENSP00000234396 | ATP6V1B1  | 513  | 0 | 5   | 8 | 0 | 12  | 5 |
| ENSP00000234677 | SARS      | 514  | 0 | 1   | 1 | 0 | 0   | 0 |
| ENSP00000236342 | DHDDS     | 333  | 0 | 1   | 0 | 0 | 0   | 0 |
| ENSP00000236957 | EEF1B2    | 225  | 0 | 1   | 1 | 0 | 1   | 0 |
| ENSP00000238018 | GDA       | 471  | 0 | 1   | 0 | 0 | 1   | 0 |
| ENSP00000238875 | LGALS1    | 172  | 0 | 1   | 0 | 1 | 1   | 0 |
| ENSP00000239940 | PFN2      | 140  | 0 | 1   | 1 | 0 | 1   | 0 |
| ENSP00000240139 | PPP3CC    | 512  | 0 | 1   | 1 | 1 | 1   | 0 |
| ENSP00000240185 | TARDBP    | 414  | 0 | 1   | 2 | 0 | 0   | 0 |
| ENSP00000242059 | SCRN1     | 414  | 0 | 1   | 0 | 0 | 0   | 0 |
| ENSP00000242577 | DYNLL1    | 89   | 0 | 1   | 2 | 1 | 2   | 1 |
| ENSP00000243298 | RAB9B     | 201  | 0 | 0.5 | 0 | 1 | 0.5 | 0 |
| ENSP00000243903 | ACTR5     | 607  | 0 | 1   | 1 | 0 | 0   | 0 |
| ENSP00000244040 | RAB22A    | 194  | 0 | 1   | 0 | 0 | 1   | 0 |
| ENSP00000244766 | NRN1      | 142  | 0 | 1   | 0 | 0 | 0   | 1 |
| ENSP00000245304 | RAP2A     | 183  | 0 | 3   | 1 | 1 | 0   | 1 |
| ENSP00000246489 | KLC1      | 637  | 0 | 1   | 0 | 1 | 0   | 0 |
| ENSP00000246548 | UBA2      | 640  | 0 | 1   | 0 | 0 | 0   | 0 |
| ENSP00000246635 | KRT13     | 458  | 0 | 1   | 1 | 0 | 0   | 0 |
| ENSP00000246792 | RRAS      | 218  | 0 | 1   | 1 | 0 | 0   | 2 |
| ENSP00000247665 | PHPT1     | 125  | 0 | 1   | 0 | 0 | 1   | 0 |
| ENSP00000247706 | ABHD8     | 439  | 0 | 1   | 0 | 0 | 0   | 0 |
| ENSP00000247930 | ZNF777    | 831  | 0 | 1   | 0 | 0 | 1   | 1 |
| ENSP00000248996 | GNAZ      | 355  | 0 | 2   | 1 | 1 | 1   | 1 |
| ENSP00000249270 | DNAJC2    | 568  | 0 | 2   | 1 | 0 | 1   | 1 |
| ENSP00000249396 | SIRT2     | 389  | 0 | 1   | 0 | 0 | 0   | 0 |
| ENSP00000250498 | DAD1      | 113  | 0 | 1   | 1 | 0 | 1   | 2 |
| ENSP00000250784 | RPS4Y1    | 263  | 0 | 3   | 3 | 0 | 0   | 0 |
| ENSP00000252027 | SBF1      | 1868 | 0 | 1   | 0 | 0 | 0   | 1 |
| ENSP00000252250 | KRT6C     | 564  | 0 | 5   | 6 | 2 | 0   | 0 |
| ENSP00000252252 | KRT6B     | 564  | 0 | 11  | 5 | 2 | 1   | 0 |
| ENSP00000252512 | XPO7      | 1087 | 0 | 1   | 0 | 0 | 0   | 1 |

|                 |          |      |   |      |     |   |     |   |
|-----------------|----------|------|---|------|-----|---|-----|---|
| ENSP00000252593 | BST2     | 180  | 0 | 1    | 0   | 0 | 0   | 0 |
| ENSP00000252599 | COLGALT1 | 622  | 0 | 1    | 0   | 0 | 0   | 0 |
| ENSP00000253003 | ADRM1    | 407  | 0 | 1    | 0   | 0 | 0   | 0 |
| ENSP00000253023 | UBE2M    | 183  | 0 | 7    | 0   | 0 | 0   | 0 |
| ENSP00000253054 | GMFG     | 109  | 0 | 1    | 0   | 1 | 0   | 0 |
| ENSP00000253408 | GFAP     | 432  | 0 | 1    | 0.5 | 0 | 0   | 0 |
| ENSP00000253788 | RPL27    | 136  | 0 | 2    | 0   | 0 | 3   | 1 |
| ENSP00000253794 | VPS25    | 176  | 0 | 3    | 0   | 0 | 1   | 1 |
| ENSP00000254442 | WDR7     | 1490 | 0 | 1    | 1   | 1 | 3   | 2 |
| ENSP00000254901 | REEP2    | 252  | 0 | 1    | 0   | 0 | 0   | 0 |
| ENSP00000256010 | NTS      | 170  | 0 | 1    | 0   | 0 | 0   | 0 |
| ENSP00000256078 | KRAS     | 189  | 0 | 1    | 0   | 1 | 0   | 2 |
| ENSP00000256496 | ARL8B    | 186  | 0 | 10.5 | 4   | 2 | 8   | 7 |
| ENSP00000256797 | ERN2     | 974  | 0 | 1    | 0   | 1 | 0   | 0 |
| ENSP00000256876 | IL2RA    | 263  | 0 | 1    | 0   | 0 | 0   | 0 |
| ENSP00000256935 | DOCK2    | 1830 | 0 | 1    | 0   | 0 | 1   | 0 |
| ENSP00000258405 | SERPINE2 | 398  | 0 | 1    | 0   | 0 | 0   | 0 |
| ENSP00000258455 | MRPS9    | 396  | 0 | 1    | 0   | 0 | 0   | 0 |
| ENSP00000258739 | KDELR2   | 212  | 0 | 1    | 0   | 0 | 0   | 0 |
| ENSP00000258962 | SRSF1    | 248  | 0 | 1    | 1   | 0 | 0   | 0 |
| ENSP00000259455 | GABBR2   | 941  | 0 | 1    | 2   | 1 | 0   | 0 |
| ENSP00000259477 | ARPC5L   | 153  | 0 | 3    | 0   | 0 | 2   | 2 |
| ENSP00000260638 | RAB1A    | 129  | 0 | 2.5  | 0   | 3 | 2.5 | 5 |
| ENSP00000260746 | ARL3     | 182  | 0 | 4    | 0   | 0 | 1   | 0 |
| ENSP00000261017 | ABI2     | 475  | 0 | 1    | 0   | 0 | 0   | 0 |
| ENSP00000261182 | NAP1L1   | 391  | 0 | 1    | 1   | 0 | 0   | 1 |
| ENSP00000261263 | RAB21    | 225  | 0 | 2    | 1   | 1 | 1   | 1 |
| ENSP00000261636 | ARL1     | 181  | 0 | 2    | 0   | 0 | 0   | 0 |
| ENSP00000261772 | AARS     | 968  | 0 | 3    | 0   | 2 | 7   | 4 |
| ENSP00000261797 | NDST1    | 882  | 0 | 1    | 0   | 0 | 0   | 0 |
| ENSP00000261839 | MYO5C    | 1742 | 0 | 2    | 1   | 0 | 1   | 2 |
| ENSP00000261937 | FLT4     | 1363 | 0 | 1    | 0   | 0 | 0   | 0 |
| ENSP00000262033 | PTGES3   | 160  | 0 | 8    | 0   | 1 | 4   | 3 |
| ENSP00000262043 | PHF3     | 2039 | 0 | 1    | 0   | 0 | 0   | 0 |
| ENSP00000262102 | MTUS1    | 1270 | 0 | 1    | 0   | 0 | 0   | 0 |
| ENSP00000262113 | MYOM2    | 1465 | 0 | 1    | 0   | 0 | 0   | 0 |
| ENSP00000262187 | RHEB     | 184  | 0 | 1    | 0   | 0 | 2   | 0 |
| ENSP00000262215 | ARFGEF1  | 1849 | 0 | 1    | 0   | 0 | 0   | 0 |
| ENSP00000262306 | TCEB2    | 161  | 0 | 2    | 1   | 0 | 2   | 0 |
| ENSP00000262419 | KANSL1   | 1105 | 0 | 1    | 0   | 0 | 0   | 0 |
| ENSP00000262631 | SCN1B    | 218  | 0 | 1    | 0   | 0 | 0   | 0 |
| ENSP00000262803 | UPF1     | 1118 | 0 | 1    | 0   | 0 | 1   | 0 |
| ENSP00000262811 | MAST3    | 1309 | 0 | 1    | 0   | 0 | 0   | 0 |
| ENSP00000262835 | ACSL4    | 670  | 0 | 1    | 0   | 0 | 1   | 1 |
| ENSP00000262942 | ARPC1A   | 370  | 0 | 4    | 2   | 1 | 2   | 2 |
| ENSP00000262948 | MAP2K2   | 400  | 0 | 2    | 0   | 0 | 1   | 1 |
| ENSP00000262982 | CSE1L    | 971  | 0 | 3    | 1   | 1 | 1   | 1 |
| ENSP00000263025 | MAPK3    | 379  | 0 | 2    | 1   | 0 | 0   | 0 |
| ENSP00000263050 | AKAP7    | 84   | 0 | 1    | 0   | 0 | 0   | 0 |
| ENSP00000263168 | CAPZA1   | 286  | 0 | 3    | 0   | 1 | 0   | 0 |
| ENSP00000263270 | AP2S1    | 142  | 0 | 4    | 0   | 0 | 3   | 1 |
| ENSP00000263441 | DNAJC6   | 900  | 0 | 1    | 0   | 0 | 0   | 0 |
| ENSP00000263655 | CN RIP1  | 164  | 0 | 1    | 0   | 0 | 2   | 2 |
| ENSP00000263672 | SPCS2    | 226  | 0 | 1    | 0   | 0 | 0   | 0 |
| ENSP00000263674 | ARHGEF17 | 2063 | 0 | 1    | 0   | 0 | 0   | 0 |
| ENSP00000263710 | CLASP1   | 1538 | 0 | 1    | 0   | 0 | 1   | 0 |
| ENSP00000263811 | DYNC1I2  | 632  | 0 | 2    | 2   | 0 | 1   | 1 |
| ENSP00000263817 | ABC B11  | 1321 | 0 | 1    | 0   | 1 | 0   | 0 |

|                 |          |      |   |     |   |   |   |   |
|-----------------|----------|------|---|-----|---|---|---|---|
| ENSP00000264051 | NGEF     | 710  | 0 | 1   | 1 | 0 | 4 | 2 |
| ENSP00000264052 | SP100    | 879  | 0 | 2   | 0 | 0 | 0 | 0 |
| ENSP00000264059 | EFHD1    | 239  | 0 | 2   | 0 | 1 | 0 | 0 |
| ENSP00000264157 | CCNT2    | 730  | 0 | 1   | 0 | 0 | 0 | 0 |
| ENSP00000264258 | RPL31    | 125  | 0 | 4   | 0 | 0 | 3 | 2 |
| ENSP00000264331 | TOP2B    | 1626 | 0 | 1   | 0 | 0 | 0 | 0 |
| ENSP00000264357 | GRIA3    | 894  | 0 | 1   | 0 | 0 | 0 | 0 |
| ENSP00000264426 | GRIA2    | 883  | 0 | 1   | 0 | 3 | 0 | 0 |
| ENSP00000264485 | SLC4A4   | 1079 | 0 | 1   | 0 | 0 | 1 | 0 |
| ENSP00000264651 | KRT24    | 525  | 0 | 1   | 1 | 0 | 0 | 0 |
| ENSP00000264674 | MECOM    | 1116 | 0 | 1   | 1 | 0 | 0 | 0 |
| ENSP00000264689 | UFSP2    | 469  | 0 | 1   | 0 | 0 | 0 | 0 |
| ENSP00000264758 | ADD1     | 768  | 0 | 1   | 0 | 0 | 0 | 0 |
| ENSP00000264904 | USO1     | 890  | 0 | 1   | 0 | 0 | 0 | 0 |
| ENSP00000264993 | CDV3     | 258  | 0 | 1   | 0 | 0 | 0 | 0 |
| ENSP00000265052 | MGLL     | 313  | 0 | 1   | 1 | 0 | 0 | 0 |
| ENSP00000265073 | SUB1     | 127  | 0 | 1   | 0 | 0 | 0 | 0 |
| ENSP00000265077 | VCAN     | 3396 | 0 | 1   | 0 | 0 | 1 | 0 |
| ENSP00000265100 | RPL26L1  | 145  | 0 | 2   | 0 | 0 | 0 | 0 |
| ENSP00000265107 | WDR70    | 654  | 0 | 1   | 0 | 0 | 0 | 0 |
| ENSP00000265312 | FN1      | 2211 | 0 | 1   | 0 | 0 | 1 | 0 |
| ENSP00000265335 | RAD50    | 1312 | 0 | 1   | 0 | 0 | 0 | 0 |
| ENSP00000265368 | SYNE1    | 8797 | 0 | 1   | 1 | 0 | 0 | 0 |
| ENSP00000265421 | POLB     | 335  | 0 | 1   | 0 | 0 | 0 | 0 |
| ENSP00000265459 | NRXN2    | 1712 | 0 | 1   | 0 | 0 | 0 | 1 |
| ENSP00000265563 | PRKAR2A  | 404  | 0 | 2   | 1 | 0 | 3 | 0 |
| ENSP00000265620 | GNAS     | 379  | 0 | 1   | 0 | 0 | 1 | 0 |
| ENSP00000265662 | ABCA2    | 2436 | 0 | 2   | 2 | 0 | 3 | 2 |
| ENSP00000265709 | ANK1     | 1897 | 0 | 1   | 0 | 0 | 1 | 0 |
| ENSP00000265729 | SRI      | 198  | 0 | 1   | 0 | 0 | 0 | 0 |
| ENSP00000265838 | ACAT1    | 427  | 0 | 2   | 0 | 0 | 2 | 0 |
| ENSP00000265990 | BTA1F1   | 1849 | 0 | 1   | 2 | 0 | 0 | 0 |
| ENSP00000266126 | EIF2B2   | 351  | 0 | 1   | 0 | 0 | 0 | 0 |
| ENSP00000266742 | NEDD1    | 660  | 0 | 1   | 0 | 0 | 0 | 0 |
| ENSP00000268446 | MYLK4    | 388  | 0 | 1   | 0 | 0 | 0 | 0 |
| ENSP00000268712 | NCOR1    | 2440 | 0 | 1   | 0 | 0 | 0 | 0 |
| ENSP00000269080 | ABCA8    | 1581 | 0 | 1   | 0 | 0 | 0 | 1 |
| ENSP00000269095 | MPP2     | 552  | 0 | 1   | 1 | 0 | 0 | 0 |
| ENSP00000269214 | ESCO1    | 840  | 0 | 1   | 0 | 0 | 0 | 0 |
| ENSP00000269554 | PIP4K2B  | 416  | 0 | 2   | 1 | 0 | 0 | 0 |
| ENSP00000269886 | SH3GL1   | 368  | 0 | 2   | 0 | 1 | 2 | 0 |
| ENSP00000270625 | RPS11    | 158  | 0 | 1   | 0 | 0 | 2 | 1 |
| ENSP00000270708 | WRAP73   | 460  | 0 | 1   | 2 | 0 | 0 | 1 |
| ENSP00000271688 | CERS2    | 380  | 0 | 1   | 0 | 0 | 0 | 0 |
| ENSP00000272134 | LEFTY1   | 366  | 0 | 1   | 0 | 0 | 0 | 0 |
| ENSP00000272217 | ARL8A    | 186  | 0 | 3.5 | 0 | 0 | 0 | 0 |
| ENSP00000272298 | CALM2    | 149  | 0 | 2   | 1 | 2 | 2 | 2 |
| ENSP00000273130 | DYNC1LI1 | 523  | 0 | 1   | 1 | 0 | 0 | 0 |
| ENSP00000273368 | TAGLN3   | 199  | 0 | 4   | 0 | 1 | 1 | 0 |
| ENSP00000274643 | MYLK4    | 388  | 0 | 1   | 0 | 0 | 0 | 0 |
| ENSP00000275730 | SLC12A9  | 914  | 0 | 0.5 | 0 | 0 | 0 | 0 |
| ENSP00000276079 | NONO     | 471  | 0 | 1   | 0 | 0 | 0 | 1 |
| ENSP00000277225 | ZNF462   | 2506 | 0 | 1   | 0 | 0 | 0 | 0 |
| ENSP00000279599 | ABI1     | 496  | 0 | 1.5 | 0 | 0 | 1 | 0 |
| ENSP00000280346 | DLAT     | 647  | 0 | 1   | 1 | 0 | 0 | 0 |
| ENSP00000281243 | QDPR     | 244  | 0 | 5   | 1 | 1 | 6 | 2 |
| ENSP00000282141 | CRYGC    | 174  | 0 | 0.5 | 0 | 0 | 0 | 0 |
| ENSP00000282541 | GPD1L    | 351  | 0 | 1   | 1 | 0 | 1 | 1 |

|                 |           |      |   |     |   |   |   |   |
|-----------------|-----------|------|---|-----|---|---|---|---|
| ENSP00000282588 | ITGA1     | 1179 | 0 | 1   | 0 | 0 | 0 | 0 |
| ENSP00000283141 | SYCP2L    | 812  | 0 | 1   | 0 | 0 | 0 | 0 |
| ENSP00000283195 | RANBP2    | 3224 | 0 | 1   | 0 | 0 | 0 | 0 |
| ENSP00000283254 | SCN3A     | 2000 | 0 | 2   | 1 | 0 | 0 | 0 |
| ENSP00000283256 | SCN2A     | 2005 | 0 | 1   | 0 | 0 | 0 | 1 |
| ENSP00000283628 | UBP1      | 540  | 0 | 2   | 0 | 0 | 2 | 0 |
| ENSP00000284202 | IMPACT    | 320  | 0 | 2   | 1 | 0 | 1 | 3 |
| ENSP00000284240 | THY1      | 161  | 0 | 1   | 0 | 0 | 0 | 0 |
| ENSP00000284811 | TCEB1     | 112  | 0 | 1   | 0 | 0 | 2 | 3 |
| ENSP00000284981 | APP       | 770  | 0 | 2   | 1 | 0 | 1 | 0 |
| ENSP00000285039 | MYO5B     | 1848 | 0 | 1   | 0 | 0 | 0 | 0 |
| ENSP00000285393 | ATP6V0D2  | 350  | 0 | 0.5 | 0 | 0 | 0 | 0 |
| ENSP00000285735 | RHOC      | 193  | 0 | 1   | 0 | 0 | 0 | 0 |
| ENSP00000286428 | VBP1      | 197  | 0 | 1   | 1 | 0 | 0 | 0 |
| ENSP00000286835 | SCAF4     | 1147 | 0 | 1   | 1 | 0 | 0 | 1 |
| ENSP00000287038 | RPL30     | 115  | 0 | 2   | 2 | 1 | 2 | 0 |
| ENSP00000287380 | TBC1D31   | 1066 | 0 | 1   | 0 | 0 | 0 | 0 |
| ENSP00000287613 | ARPC4     | 78   | 0 | 4   | 0 | 1 | 2 | 2 |
| ENSP00000288221 | ERC2      | 957  | 0 | 1   | 0 | 0 | 0 | 0 |
| ENSP00000289166 | FAM46B    | 425  | 0 | 1   | 0 | 0 | 0 | 0 |
| ENSP00000289316 | HIST1H2BD | 126  | 0 | 1   | 0 | 0 | 2 | 0 |
| ENSP00000290209 | SLC12A6   | 1099 | 0 | 1   | 0 | 1 | 0 | 0 |
| ENSP00000290299 | ATP5O     | 213  | 0 | 1   | 0 | 0 | 0 | 0 |
| ENSP00000290349 | CBR1      | 277  | 0 | 2   | 1 | 0 | 1 | 0 |
| ENSP00000290573 | HK2       | 917  | 0 | 1   | 0 | 0 | 3 | 0 |
| ENSP00000290921 | CTBP1     | 440  | 0 | 1   | 0 | 0 | 0 | 2 |
| ENSP00000291503 | ATP13A1   | 1086 | 0 | 1   | 0 | 0 | 0 | 0 |
| ENSP00000291700 | S100B     | 92   | 0 | 3   | 2 | 3 | 6 | 5 |
| ENSP00000292304 | LMNA      | 634  | 0 | 1   | 0 | 0 | 0 | 0 |
| ENSP00000293371 | DCD       | 110  | 0 | 1   | 2 | 0 | 0 | 0 |
| ENSP00000294117 | GNG3      | 75   | 0 | 1   | 1 | 0 | 0 | 0 |
| ENSP00000294618 | DOCK6     | 2047 | 0 | 1   | 0 | 0 | 0 | 0 |
| ENSP00000294725 | KCNT2     | 1135 | 0 | 1   | 0 | 0 | 0 | 0 |
| ENSP00000295237 | XIRP2     | 3549 | 0 | 1   | 0 | 1 | 0 | 1 |
| ENSP00000295238 | CCNT2     | 663  | 0 | 1   | 0 | 0 | 0 | 0 |
| ENSP00000295448 | GNPDA2    | 276  | 0 | 1   | 0 | 0 | 0 | 0 |
| ENSP00000295640 | RNPEP     | 650  | 0 | 1   | 2 | 0 | 4 | 0 |
| ENSP00000295822 | EIF5A2    | 153  | 0 | 1   | 0 | 1 | 0 | 1 |
| ENSP00000295897 | ALB       | 609  | 0 | 1   | 0 | 1 | 0 | 0 |
| ENSP00000295937 | DNAH12    | 3092 | 0 | 1   | 1 | 0 | 1 | 0 |
| ENSP00000296255 | RPN1      | 607  | 0 | 2   | 3 | 0 | 1 | 0 |
| ENSP00000296289 | TKT       | 576  | 0 | 1   | 1 | 0 | 3 | 1 |
| ENSP00000296417 | H2AFZ     | 128  | 0 | 1   | 0 | 0 | 0 | 0 |
| ENSP00000296674 | RPS23     | 143  | 0 | 2   | 0 | 0 | 0 | 0 |
| ENSP00000296679 | WDR41     | 459  | 0 | 1   | 0 | 0 | 0 | 0 |
| ENSP00000296742 | CAGE1     | 641  | 0 | 1   | 0 | 0 | 0 | 0 |
| ENSP00000296820 | TERT      | 807  | 0 | 1   | 0 | 0 | 0 | 0 |
| ENSP00000297518 | CDK5      | 260  | 0 | 1   | 1 | 0 | 0 | 0 |
| ENSP00000298097 | FBXO33    | 555  | 0 | 1   | 0 | 0 | 0 | 0 |
| ENSP00000298283 | RPL10L    | 214  | 0 | 1   | 1 | 0 | 0 | 0 |
| ENSP00000298316 | ARF6      | 175  | 0 | 4   | 0 | 0 | 2 | 0 |
| ENSP00000298684 | NDRG2     | 328  | 0 | 5   | 2 | 0 | 4 | 1 |
| ENSP00000298743 | GAS1      | 345  | 0 | 1   | 0 | 0 | 0 | 0 |
| ENSP00000298767 | WAPAL     | 1190 | 0 | 1   | 0 | 0 | 0 | 0 |
| ENSP00000298852 | PSMC3     | 439  | 0 | 1   | 0 | 0 | 0 | 0 |
| ENSP00000299714 | SEC11C    | 99   | 0 | 1   | 0 | 0 | 0 | 0 |
| ENSP00000299736 | CENPV     | 272  | 0 | 1   | 1 | 0 | 0 | 0 |
| ENSP00000299798 | SLC9A5    | 896  | 0 | 1   | 0 | 0 | 0 | 0 |

|                 |          |      |   |     |     |   |   |   |
|-----------------|----------|------|---|-----|-----|---|---|---|
| ENSP00000300177 | GREM1    | 184  | 0 | 2   | 0   | 0 | 0 | 0 |
| ENSP00000300413 | SNRPD1   | 119  | 0 | 1   | 1   | 0 | 0 | 0 |
| ENSP00000300527 | COL6A2   | 1019 | 0 | 1   | 0   | 0 | 0 | 0 |
| ENSP00000300797 | PRRT2    | 299  | 0 | 1   | 0   | 0 | 0 | 0 |
| ENSP00000301072 | TUBA1C   | 449  | 0 | 5   | 0   | 0 | 2 | 1 |
| ENSP00000301180 | DIP2B    | 1576 | 0 | 1   | 0   | 0 | 0 | 0 |
| ENSP00000301653 | KRT16    | 473  | 0 | 4   | 3   | 0 | 0 | 0 |
| ENSP00000301891 | SLC22A11 | 550  | 0 | 1   | 3   | 1 | 0 | 0 |
| ENSP00000302194 | ATP6V1G2 | 118  | 0 | 2   | 0   | 0 | 1 | 2 |
| ENSP00000302896 | RPS9     | 194  | 0 | 3   | 0   | 1 | 1 | 0 |
| ENSP00000303476 | TLN2     | 2542 | 0 | 1   | 0   | 0 | 0 | 0 |
| ENSP00000304006 | PAFAH1B2 | 175  | 0 | 1   | 1   | 2 | 1 | 0 |
| ENSP00000304133 | SCG2     | 617  | 0 | 1   | 0   | 0 | 0 | 0 |
| ENSP00000304500 | ATP9B    | 1136 | 0 | 1   | 0   | 0 | 1 | 2 |
| ENSP00000304604 | MAGI3    | 1481 | 0 | 4   | 3   | 1 | 4 | 1 |
| ENSP00000304704 | CLP1     | 361  | 0 | 1   | 0   | 0 | 0 | 0 |
| ENSP00000304748 | SCN9A    | 1989 | 0 | 1   | 1   | 0 | 0 | 0 |
| ENSP00000305260 | GNB2     | 340  | 0 | 5   | 5   | 0 | 3 | 2 |
| ENSP00000305556 | PCBP1    | 356  | 0 | 2   | 1   | 0 | 3 | 0 |
| ENSP00000305860 | HNRNPD   | 336  | 0 | 1   | 1   | 0 | 0 | 0 |
| ENSP00000305941 | USH2A    | 5202 | 0 | 0.5 | 0   | 0 | 0 | 0 |
| ENSP00000306010 | ARF4     | 180  | 0 | 1   | 0   | 0 | 0 | 0 |
| ENSP00000306106 | JAGN1    | 183  | 0 | 3   | 0   | 0 | 0 | 0 |
| ENSP00000306670 | NUDT16L1 | 211  | 0 | 4   | 0   | 1 | 0 | 1 |
| ENSP00000306918 | PCDHGC4  | 938  | 0 | 1   | 0   | 0 | 0 | 0 |
| ENSP00000307188 | ASL      | 464  | 0 | 1   | 0   | 0 | 0 | 0 |
| ENSP00000307208 | BPTF     | 2920 | 0 | 1   | 0   | 0 | 1 | 0 |
| ENSP00000307240 | KRT74    | 529  | 0 | 1.5 | 0   | 2 | 0 | 0 |
| ENSP00000307567 | QARS     | 775  | 0 | 1   | 0   | 0 | 0 | 0 |
| ENSP00000307634 | AGAP1    | 857  | 0 | 1   | 0   | 0 | 0 | 0 |
| ENSP00000307674 | CANT1    | 401  | 0 | 1   | 0   | 0 | 0 | 0 |
| ENSP00000307786 | CYCS     | 105  | 0 | 1   | 0   | 1 | 0 | 1 |
| ENSP00000307889 | RPL13    | 211  | 0 | 4   | 1   | 0 | 1 | 0 |
| ENSP00000307939 | GCC2     | 1684 | 0 | 1   | 0   | 0 | 1 | 1 |
| ENSP00000308021 | CEP290   | 2481 | 0 | 1   | 0   | 0 | 0 | 0 |
| ENSP00000308318 | PPP1R3B  | 285  | 0 | 1   | 0   | 0 | 0 | 0 |
| ENSP00000308532 | DBN1     | 649  | 0 | 1   | 0   | 0 | 0 | 0 |
| ENSP00000308685 | ADCY5    | 911  | 0 | 1   | 0   | 0 | 0 | 0 |
| ENSP00000308773 | PPIP5K1  | 1406 | 0 | 1   | 0   | 0 | 0 | 0 |
| ENSP00000308887 | WNT5B    | 359  | 0 | 1   | 0   | 0 | 0 | 0 |
| ENSP00000308908 | GPR148   | 347  | 0 | 1   | 0   | 0 | 0 | 0 |
| ENSP00000308927 | SOX5     | 750  | 0 | 1   | 1   | 0 | 0 | 0 |
| ENSP00000308957 | MCTP1    | 778  | 0 | 1   | 0   | 0 | 0 | 0 |
| ENSP00000309334 | RPL15    | 204  | 0 | 2   | 0   | 0 | 0 | 0 |
| ENSP00000309591 | PRKACA   | 351  | 0 | 3   | 4   | 3 | 3 | 2 |
| ENSP00000309845 | HRAS     | 189  | 0 | 2   | 1   | 0 | 2 | 0 |
| ENSP00000310572 | PSMC5    | 406  | 0 | 1   | 0   | 0 | 1 | 0 |
| ENSP00000310668 | NUP93    | 819  | 0 | 1   | 0   | 0 | 0 | 0 |
| ENSP00000310749 | HPCAL1   | 193  | 0 | 2   | 0   | 2 | 0 | 0 |
| ENSP00000310935 | FKBP2    | 142  | 0 | 1   | 1   | 0 | 0 | 0 |
| ENSP00000311115 | ECHDC1   | 284  | 0 | 2   | 1   | 0 | 0 | 0 |
| ENSP00000311293 | RAPH1    | 644  | 0 | 1   | 0   | 0 | 0 | 0 |
| ENSP00000311449 | RAB6A    | 208  | 0 | 5   | 2   | 0 | 3 | 0 |
| ENSP00000311469 | GSTM1    | 218  | 0 | 2   | 1   | 3 | 1 | 1 |
| ENSP00000311930 | ETFB     | 255  | 0 | 1   | 1   | 0 | 0 | 0 |
| ENSP00000312042 | HDLBP    | 1268 | 0 | 1   | 0   | 0 | 0 | 0 |
| ENSP00000312206 | KRT3     | 629  | 0 | 2   | 0.5 | 1 | 1 | 0 |
| ENSP00000312529 | COL6A2   | 828  | 0 | 1   | 0   | 0 | 0 | 0 |

|                 |          |      |   |   |   |   |   |    |
|-----------------|----------|------|---|---|---|---|---|----|
| ENSP00000313829 | KHDRBS1  | 443  | 0 | 2 | 0 | 0 | 0 | 0  |
| ENSP00000313933 | GLTSCR1L | 1079 | 0 | 1 | 1 | 0 | 1 | 0  |
| ENSP00000314214 | VAMP2    | 116  | 0 | 9 | 3 | 1 | 7 | 10 |
| ENSP00000314348 | DDX10    | 875  | 0 | 1 | 0 | 0 | 0 | 0  |
| ENSP00000314776 | MBLAC2   | 279  | 0 | 1 | 0 | 0 | 0 | 0  |
| ENSP00000314850 | PPM1A    | 324  | 0 | 1 | 0 | 0 | 0 | 0  |
| ENSP00000315454 | BPTF     | 3046 | 0 | 1 | 0 | 0 | 1 | 0  |
| ENSP00000316696 | GRIN1    | 922  | 0 | 1 | 0 | 0 | 0 | 0  |
| ENSP00000317300 | LPCAT4   | 524  | 0 | 1 | 1 | 2 | 0 | 0  |
| ENSP00000317302 | C21orf2  | 255  | 0 | 1 | 0 | 0 | 0 | 0  |
| ENSP00000317468 | CHMP6    | 201  | 0 | 1 | 1 | 0 | 1 | 0  |
| ENSP00000317636 | RECQL5   | 991  | 0 | 1 | 0 | 0 | 0 | 0  |
| ENSP00000317891 | TNIP1    | 636  | 0 | 1 | 0 | 0 | 0 | 0  |
| ENSP00000318643 | EPSTI1   | 307  | 0 | 1 | 0 | 0 | 0 | 0  |
| ENSP00000318646 | RPS15A   | 130  | 0 | 1 | 0 | 0 | 2 | 1  |
| ENSP00000318803 | SYTL2    | 935  | 0 | 1 | 0 | 0 | 0 | 1  |
| ENSP00000319096 | RAP2B    | 183  | 0 | 4 | 1 | 2 | 1 | 2  |
| ENSP00000319678 | ST5      | 1137 | 0 | 1 | 0 | 0 | 0 | 0  |
| ENSP00000319690 | HNRNPC   | 306  | 0 | 1 | 2 | 0 | 2 | 3  |
| ENSP00000320622 | MYLK     | 1845 | 0 | 1 | 0 | 0 | 0 | 0  |
| ENSP00000320777 | ASCC3    | 176  | 0 | 1 | 0 | 0 | 0 | 0  |
| ENSP00000321071 | SEPT4    | 459  | 0 | 1 | 1 | 0 | 1 | 0  |
| ENSP00000321203 | TNIP2    | 429  | 0 | 1 | 0 | 0 | 0 | 0  |
| ENSP00000321537 | LLGL1    | 1064 | 0 | 1 | 0 | 0 | 0 | 0  |
| ENSP00000321826 | STXBP5   | 1151 | 0 | 1 | 0 | 0 | 0 | 0  |
| ENSP00000322175 | AK4      | 223  | 0 | 1 | 0 | 0 | 0 | 0  |
| ENSP00000322316 | COQ7     | 217  | 0 | 1 | 0 | 0 | 0 | 0  |
| ENSP00000322439 | TUFM     | 455  | 0 | 1 | 0 | 0 | 0 | 0  |
| ENSP00000322938 | SCRIB    | 1630 | 0 | 1 | 0 | 0 | 0 | 0  |
| ENSP00000323687 | UBE2O    | 1292 | 0 | 1 | 2 | 1 | 0 | 1  |
| ENSP00000325127 | ERGIC1   | 159  | 0 | 1 | 0 | 0 | 1 | 0  |
| ENSP00000325269 | NRCAM    | 1183 | 0 | 1 | 0 | 1 | 1 | 0  |
| ENSP00000325369 | AP3S1    | 193  | 0 | 2 | 0 | 0 | 1 | 2  |
| ENSP00000325506 | CLVS1    | 354  | 0 | 1 | 0 | 1 | 0 | 0  |
| ENSP00000325905 | SRSF7    | 238  | 0 | 1 | 0 | 0 | 0 | 0  |
| ENSP00000326247 | SAMD9L   | 1584 | 0 | 1 | 1 | 0 | 0 | 0  |
| ENSP00000326411 | CWF19L1  | 538  | 0 | 1 | 0 | 0 | 0 | 0  |
| ENSP00000326708 | OVCH1    | 1134 | 0 | 1 | 0 | 0 | 0 | 0  |
| ENSP00000327054 | LMNB2    | 620  | 0 | 1 | 0 | 0 | 0 | 0  |
| ENSP00000327209 | PDE4DIP  | 2240 | 0 | 3 | 0 | 1 | 2 | 1  |
| ENSP00000327583 | RANBP1   | 201  | 0 | 3 | 0 | 0 | 0 | 1  |
| ENSP00000328203 | TRAIIP   | 469  | 0 | 1 | 0 | 1 | 0 | 0  |
| ENSP00000328690 | DDX24    | 859  | 0 | 1 | 0 | 0 | 0 | 0  |
| ENSP00000329376 | CNOT10   | 717  | 0 | 1 | 0 | 0 | 0 | 0  |
| ENSP00000329471 | KDELR1   | 212  | 0 | 1 | 0 | 0 | 0 | 0  |
| ENSP00000329757 | ATP6V0C  | 155  | 0 | 1 | 0 | 0 | 0 | 0  |
| ENSP00000329867 | PPME1    | 386  | 0 | 1 | 0 | 1 | 0 | 0  |
| ENSP00000330633 | CNTN2    | 1040 | 0 | 1 | 0 | 1 | 1 | 2  |
| ENSP00000330945 | TMED9    | 235  | 0 | 2 | 2 | 0 | 0 | 0  |
| ENSP00000331363 | C19orf68 | 627  | 0 | 1 | 1 | 0 | 0 | 0  |
| ENSP00000331485 | RGS7     | 451  | 0 | 2 | 0 | 0 | 1 | 0  |
| ENSP00000331563 | ARL17A   | 125  | 0 | 1 | 0 | 0 | 0 | 2  |
| ENSP00000331748 | RAB12    | 244  | 0 | 1 | 0 | 0 | 0 | 0  |
| ENSP00000331787 | METTL7A  | 244  | 0 | 2 | 1 | 0 | 0 | 0  |
| ENSP00000331897 | IDH2     | 452  | 0 | 5 | 4 | 1 | 3 | 2  |
| ENSP00000331902 | COL4A5   | 1691 | 0 | 1 | 0 | 0 | 0 | 0  |
| ENSP00000332706 | PURA     | 322  | 0 | 1 | 3 | 0 | 3 | 2  |
| ENSP00000332931 | SLC8A1   | 973  | 0 | 1 | 0 | 0 | 0 | 1  |

|                 |          |      |   |     |     |   |   |   |
|-----------------|----------|------|---|-----|-----|---|---|---|
| ENSP00000333551 | PROSC    | 275  | 0 | 1   | 1   | 1 | 1 | 0 |
| ENSP00000334448 | GNG2     | 71   | 0 | 3   | 5   | 2 | 2 | 3 |
| ENSP00000334523 | KLC1     | 639  | 0 | 1   | 0   | 1 | 0 | 0 |
| ENSP00000334779 | PPIP5K1  | 1408 | 0 | 1   | 0   | 0 | 0 | 0 |
| ENSP00000334785 | TESC     | 214  | 0 | 1   | 0   | 0 | 0 | 0 |
| ENSP00000334798 | KRT26    | 468  | 0 | 2   | 3   | 0 | 0 | 0 |
| ENSP00000334808 | USP16    | 823  | 0 | 1   | 0   | 0 | 0 | 0 |
| ENSP00000334983 | PKM      | 531  | 0 | 3   | 3   | 0 | 6 | 0 |
| ENSP00000335341 | CDC42BPA | 1781 | 0 | 1   | 0   | 0 | 0 | 0 |
| ENSP00000335371 | TRAPP11  | 1133 | 0 | 1   | 0   | 0 | 0 | 0 |
| ENSP00000335397 | RTN4RL2  | 420  | 0 | 1   | 0   | 0 | 0 | 0 |
| ENSP00000336721 | LARP1    | 1019 | 0 | 3   | 0   | 1 | 0 | 4 |
| ENSP00000336725 | DDX3Y    | 660  | 0 | 1   | 1   | 0 | 1 | 0 |
| ENSP00000336741 | DHX15    | 795  | 0 | 1   | 0   | 0 | 0 | 0 |
| ENSP00000337226 | CDCA4    | 241  | 0 | 1   | 0   | 0 | 0 | 0 |
| ENSP00000337838 | RTN4     | 1192 | 0 | 1   | 0   | 1 | 0 | 0 |
| ENSP00000338107 | CAGE1    | 824  | 0 | 1   | 0   | 0 | 0 | 0 |
| ENSP00000338200 | FN1      | 2355 | 0 | 1   | 0   | 0 | 1 | 0 |
| ENSP00000338650 | ZC4H2    | 201  | 0 | 1   | 0   | 0 | 0 | 0 |
| ENSP00000338777 | AP3S2    | 193  | 0 | 1   | 0   | 0 | 1 | 0 |
| ENSP00000339027 | RPLP0    | 317  | 0 | 3   | 0   | 0 | 1 | 0 |
| ENSP00000339063 | EEF1A1   | 462  | 0 | 4   | 1   | 2 | 4 | 5 |
| ENSP00000339095 | RPS7     | 194  | 0 | 3   | 0   | 0 | 0 | 3 |
| ENSP00000339467 | RHOG     | 191  | 0 | 2   | 0   | 0 | 2 | 0 |
| ENSP00000339485 | WARS     | 430  | 0 | 1   | 0   | 0 | 1 | 0 |
| ENSP00000339720 | NDUFA4   | 81   | 0 | 1   | 0   | 0 | 0 | 1 |
| ENSP00000339795 | RPL7     | 248  | 0 | 2   | 0   | 0 | 0 | 0 |
| ENSP00000339850 | DPYSL4   | 572  | 0 | 2   | 4   | 1 | 4 | 0 |
| ENSP00000340138 | DLEU2L   | 55   | 0 | 1   | 0   | 0 | 0 | 0 |
| ENSP00000340305 | UBE2V1   | 170  | 0 | 3   | 0   | 1 | 2 | 0 |
| ENSP00000340944 | PTPN11   | 593  | 0 | 1   | 0   | 0 | 0 | 0 |
| ENSP00000340970 | TRMT2B   | 459  | 0 | 1   | 0   | 0 | 0 | 0 |
| ENSP00000341170 | PTN      | 168  | 0 | 1   | 0   | 0 | 0 | 0 |
| ENSP00000341781 | SYNE2    | 6885 | 0 | 1   | 1   | 0 | 0 | 0 |
| ENSP00000341805 | PHF10    | 498  | 0 | 2   | 0   | 0 | 0 | 0 |
| ENSP00000342434 | BAZ1B    | 1483 | 0 | 1   | 0   | 0 | 0 | 0 |
| ENSP00000342564 | ALDH6A1  | 522  | 0 | 1   | 2   | 0 | 0 | 1 |
| ENSP00000342714 | H2AFV    | 90   | 0 | 1   | 0   | 0 | 0 | 0 |
| ENSP00000342787 | RPL28    | 137  | 0 | 2   | 0   | 0 | 1 | 0 |
| ENSP00000343002 | B3GALT1  | 498  | 0 | 0.5 | 0   | 0 | 0 | 0 |
| ENSP00000343314 | FXD1     | 92   | 0 | 2   | 1   | 0 | 0 | 0 |
| ENSP00000343317 | PPP2R1B  | 556  | 0 | 1   | 0   | 0 | 1 | 0 |
| ENSP00000343535 | USP7     | 1102 | 0 | 1   | 0   | 1 | 0 | 0 |
| ENSP00000344259 | UBE2L3   | 154  | 0 | 1   | 0   | 0 | 0 | 0 |
| ENSP00000344672 | NHSL1    | 1606 | 0 | 1   | 0   | 0 | 0 | 0 |
| ENSP00000344762 | SRSF3    | 124  | 0 | 2   | 0   | 0 | 0 | 0 |
| ENSP00000344822 | S100A13  | 98   | 0 | 2   | 2   | 0 | 0 | 1 |
| ENSP00000345079 | CSRP1    | 193  | 0 | 2   | 0   | 2 | 1 | 0 |
| ENSP00000345149 | AKAP7    | 81   | 0 | 1   | 0   | 0 | 0 | 0 |
| ENSP00000345361 | ARPC5L   | 153  | 0 | 3   | 0   | 0 | 2 | 2 |
| ENSP00000345689 | RAB5C    | 216  | 0 | 4   | 2   | 0 | 3 | 4 |
| ENSP00000346022 | RPL9     | 192  | 0 | 2   | 0.5 | 0 | 0 | 0 |
| ENSP00000346027 | RPL21    | 160  | 0 | 1   | 0   | 1 | 1 | 0 |
| ENSP00000346037 | RPLP1    | 114  | 0 | 1   | 0   | 0 | 1 | 0 |
| ENSP00000346045 | RPS17    | 135  | 0 | 3   | 0   | 0 | 0 | 0 |
| ENSP00000346088 | RPL22    | 128  | 0 | 2   | 0   | 0 | 2 | 0 |
| ENSP00000346111 | NSD1     | 2427 | 0 | 2   | 0   | 1 | 0 | 0 |
| ENSP00000346173 | ETFB     | 346  | 0 | 1   | 1   | 0 | 0 | 0 |



|                 |                |      |   |     |   |   |     |   |
|-----------------|----------------|------|---|-----|---|---|-----|---|
| ENSP00000346465 | RTN4           | 960  | 0 | 2   | 0 | 0 | 0   | 0 |
| ENSP00000347232 | BLM            | 1417 | 0 | 1   | 1 | 0 | 0   | 0 |
| ENSP00000347271 | RPS10          | 165  | 0 | 1   | 0 | 0 | 0   | 0 |
| ENSP00000347281 | VPS13B         | 863  | 0 | 1   | 0 | 0 | 0   | 0 |
| ENSP00000347555 | ABI1           | 509  | 0 | 1.5 | 0 | 0 | 1   | 0 |
| ENSP00000347596 | EFEMP1         | 493  | 0 | 1   | 0 | 0 | 1   | 0 |
| ENSP00000347900 | PC             | 529  | 0 | 1   | 0 | 0 | 1   | 0 |
| ENSP00000347969 | RPL23A         | 158  | 0 | 1   | 0 | 1 | 5   | 1 |
| ENSP00000348100 | ADD1           | 662  | 0 | 1   | 0 | 0 | 0   | 0 |
| ENSP00000348442 | PSMD12         | 456  | 0 | 1   | 0 | 0 | 0   | 0 |
| ENSP00000348498 | NF1            | 2818 | 0 | 2   | 1 | 0 | 1   | 2 |
| ENSP00000348786 | RAP1A          | 184  | 0 | 1   | 0 | 0 | 0   | 0 |
| ENSP00000348849 | RPS26          | 115  | 0 | 3   | 0 | 0 | 0   | 2 |
| ENSP00000348921 | ENSA           | 140  | 0 | 1   | 0 | 0 | 0   | 0 |
| ENSP00000348933 | CCDC25         | 208  | 0 | 2   | 1 | 0 | 0   | 0 |
| ENSP00000349212 | NACA           | 215  | 0 | 1   | 2 | 0 | 2.5 | 0 |
| ENSP00000349415 | RAB18          | 206  | 0 | 8   | 1 | 2 | 5   | 1 |
| ENSP00000349560 | RAB4B          | 213  | 0 | 2   | 0 | 1 | 1   | 1 |
| ENSP00000349685 | VPS13B         | 3997 | 0 | 1   | 0 | 0 | 0   | 0 |
| ENSP00000349738 | TRAPPC11       | 1086 | 0 | 1   | 0 | 0 | 0   | 0 |
| ENSP00000349856 | PRRC2B         | 2229 | 0 | 1   | 0 | 0 | 0   | 0 |
| ENSP00000350052 | POTEF          | 1075 | 0 | 1   | 0 | 0 | 0   | 0 |
| ENSP00000350187 | WDR7           | 1457 | 0 | 1   | 0 | 0 | 0   | 0 |
| ENSP00000350332 | MYBPC2         | 1141 | 0 | 1   | 1 | 1 | 0   | 0 |
| ENSP00000350757 | GMFB           | 142  | 0 | 1   | 0 | 1 | 1   | 0 |
| ENSP00000350848 | HMG5           | 282  | 0 | 1   | 0 | 0 | 0   | 0 |
| ENSP00000350885 | RIMBP3C        | 1545 | 0 | 1   | 0 | 0 | 0   | 0 |
| ENSP00000351015 | NF1            | 2839 | 0 | 1   | 0 | 0 | 0   | 1 |
| ENSP00000351207 | KIAA1671       | 1806 | 0 | 1   | 0 | 0 | 0   | 0 |
| ENSP00000351346 | VPS13B         | 4022 | 0 | 1   | 0 | 0 | 0   | 0 |
| ENSP00000351608 | PRRT2          | 340  | 0 | 3   | 1 | 0 | 0   | 0 |
| ENSP00000351635 | GNB5           | 353  | 0 | 2   | 1 | 2 | 1   | 1 |
| ENSP00000351851 | NUMA1          | 2101 | 0 | 1   | 0 | 0 | 0   | 0 |
| ENSP00000351875 | ANKRD30B       | 1392 | 0 | 1   | 2 | 0 | 0   | 0 |
| ENSP00000352088 | MYLK           | 1863 | 0 | 1   | 0 | 0 | 0   | 0 |
| ENSP00000352143 | RPL17-C18orf32 | 190  | 0 | 2   | 1 | 1 | 1   | 0 |
| ENSP00000352667 | MBP            | 186  | 0 | 1   | 0 | 1 | 1   | 0 |
| ENSP00000352948 | AK3            | 157  | 0 | 1   | 0 | 0 | 0   | 0 |
| ENSP00000353124 | ARRB1          | 410  | 0 | 1   | 1 | 0 | 1   | 0 |
| ENSP00000353444 | RAB5B          | 215  | 0 | 5   | 5 | 0 | 4   | 3 |
| ENSP00000353512 | PARP9          | 854  | 0 | 1   | 0 | 0 | 0   | 0 |
| ENSP00000353660 | PEA15          | 130  | 0 | 1   | 0 | 0 | 1   | 0 |
| ENSP00000353701 | DPP3           | 737  | 0 | 4   | 2 | 2 | 4   | 1 |
| ENSP00000353786 | VPS29          | 186  | 0 | 1   | 0 | 0 | 2   | 1 |
| ENSP00000353998 | VKORC1L1       | 176  | 0 | 1   | 0 | 0 | 0   | 0 |
| ENSP00000354228 | CACNA2D2       | 1076 | 0 | 1   | 0 | 1 | 1   | 1 |
| ENSP00000354251 | NCKAP1         | 1134 | 0 | 3   | 0 | 4 | 7   | 5 |
| ENSP00000354310 | NSD1           | 2593 | 0 | 2   | 0 | 1 | 0   | 0 |
| ENSP00000354346 | MATR3          | 847  | 0 | 3   | 2 | 0 | 4   | 0 |
| ENSP00000354394 | STAT1          | 750  | 0 | 1   | 0 | 0 | 0   | 0 |
| ENSP00000354505 | COL4A5         | 1685 | 0 | 1   | 0 | 0 | 0   | 0 |
| ENSP00000354674 | SRPK1          | 671  | 0 | 1   | 1 | 0 | 1   | 0 |
| ENSP00000354739 | RPL12          | 165  | 0 | 2   | 0 | 0 | 4   | 0 |
| ENSP00000354997 | CLSTN1         | 971  | 0 | 1   | 0 | 0 | 1   | 2 |
| ENSP00000355122 | VAMP1          | 117  | 0 | 1   | 1 | 0 | 1   | 2 |
| ENSP00000355316 | GRM3           | 879  | 0 | 2   | 2 | 1 | 0   | 1 |
| ENSP00000355556 | GNG4           | 75   | 0 | 1   | 0 | 0 | 0   | 0 |
| ENSP00000355651 | RAB4A          | 218  | 0 | 1   | 0 | 1 | 1   | 1 |

|                 |            |      |   |   |   |   |   |   |
|-----------------|------------|------|---|---|---|---|---|---|
| ENSP00000355728 | CDC42BPA   | 1754 | 0 | 1 | 0 | 0 | 0 | 0 |
| ENSP00000355743 | PHF10      | 496  | 0 | 2 | 0 | 0 | 0 | 0 |
| ENSP00000355862 | PARK2      | 316  | 0 | 1 | 0 | 0 | 0 | 0 |
| ENSP00000355926 | RPS6KC1    | 1054 | 0 | 1 | 0 | 0 | 0 | 0 |
| ENSP00000355927 | RPS6KC1    | 1066 | 0 | 1 | 0 | 0 | 0 | 0 |
| ENSP00000356038 | S100B      | 94   | 0 | 2 | 2 | 1 | 5 | 4 |
| ENSP00000356154 | SCAF8      | 1337 | 0 | 1 | 1 | 0 | 0 | 1 |
| ENSP00000356367 | CRB1       | 674  | 0 | 1 | 1 | 0 | 2 | 1 |
| ENSP00000356403 | KCNT2      | 1111 | 0 | 1 | 0 | 0 | 0 | 0 |
| ENSP00000356450 | STXBP5     | 1098 | 0 | 2 | 0 | 1 | 0 | 0 |
| ENSP00000356736 | GORAB      | 246  | 0 | 1 | 0 | 0 | 0 | 0 |
| ENSP00000356856 | TMCO1      | 239  | 0 | 1 | 0 | 0 | 0 | 0 |
| ENSP00000356858 | MGST3      | 166  | 0 | 1 | 0 | 0 | 0 | 1 |
| ENSP00000357018 | LY9        | 193  | 0 | 1 | 0 | 0 | 0 | 0 |
| ENSP00000357555 | RPS27      | 84   | 0 | 1 | 1 | 0 | 0 | 0 |
| ENSP00000357616 | DPYSL4     | 412  | 0 | 9 | 6 | 0 | 4 | 5 |
| ENSP00000357642 | MKI67      | 2896 | 0 | 1 | 0 | 0 | 0 | 0 |
| ENSP00000357692 | S100A16    | 103  | 0 | 1 | 0 | 0 | 0 | 0 |
| ENSP00000357791 | HRNR       | 2850 | 0 | 3 | 1 | 0 | 0 | 0 |
| ENSP00000357851 | BUB3       | 326  | 0 | 1 | 1 | 0 | 0 | 0 |
| ENSP00000357858 | BUB3       | 328  | 0 | 1 | 0 | 0 | 0 | 0 |
| ENSP00000357950 | CERS2      | 380  | 0 | 1 | 0 | 0 | 0 | 0 |
| ENSP00000358106 | PREP       | 710  | 0 | 1 | 0 | 0 | 5 | 0 |
| ENSP00000358126 | VPS45      | 570  | 0 | 1 | 0 | 0 | 1 | 0 |
| ENSP00000358142 | SV2A       | 742  | 0 | 1 | 1 | 3 | 0 | 0 |
| ENSP00000358155 | HIST2H2AA4 | 130  | 0 | 2 | 2 | 2 | 2 | 1 |
| ENSP00000358527 | TSPAN2     | 193  | 0 | 1 | 0 | 0 | 1 | 0 |
| ENSP00000358548 | NRAS       | 189  | 0 | 2 | 0 | 0 | 1 | 2 |
| ENSP00000358624 | MAGI3      | 1125 | 0 | 3 | 3 | 2 | 3 | 2 |
| ENSP00000358939 | SARS       | 536  | 0 | 2 | 1 | 0 | 0 | 0 |
| ENSP00000358966 | IMPG1      | 797  | 0 | 1 | 0 | 0 | 0 | 0 |
| ENSP00000359714 | PRKACB     | 264  | 0 | 1 | 1 | 0 | 0 | 0 |
| ENSP00000359718 | PRKACB     | 245  | 0 | 2 | 3 | 0 | 0 | 0 |
| ENSP00000359719 | PRKACB     | 398  | 0 | 1 | 0 | 0 | 1 | 1 |
| ENSP00000359873 | HS6ST2     | 605  | 0 | 1 | 0 | 0 | 0 | 0 |
| ENSP00000360125 | PGM1       | 562  | 0 | 1 | 2 | 0 | 3 | 0 |
| ENSP00000360127 | DLEU2L     | 55   | 0 | 1 | 0 | 0 | 0 | 0 |
| ENSP00000360472 | LGI1       | 557  | 0 | 2 | 1 | 0 | 2 | 0 |
| ENSP00000360666 | ABCA2      | 2435 | 0 | 2 | 2 | 0 | 3 | 3 |
| ENSP00000360689 | TNKS2      | 1166 | 0 | 1 | 0 | 0 | 0 | 0 |
| ENSP00000360742 | UBE2V1     | 170  | 0 | 4 | 0 | 1 | 3 | 0 |
| ENSP00000360937 | CMPK1      | 169  | 0 | 1 | 0 | 0 | 2 | 0 |
| ENSP00000360939 | CMPK1      | 228  | 0 | 1 | 0 | 0 | 2 | 0 |
| ENSP00000361076 | RPL7A      | 266  | 0 | 2 | 3 | 2 | 0 | 1 |
| ENSP00000361283 | RPS8       | 188  | 0 | 1 | 0 | 0 | 1 | 0 |
| ENSP00000361634 | SH3GLB2    | 404  | 0 | 1 | 2 | 1 | 0 | 0 |
| ENSP00000361877 | ODF2       | 638  | 0 | 1 | 0 | 0 | 0 | 0 |
| ENSP00000361940 | RPL36A     | 80   | 0 | 1 | 0 | 0 | 0 | 0 |
| ENSP00000362022 | TRMT2B     | 494  | 0 | 1 | 0 | 0 | 0 | 0 |
| ENSP00000362335 | SAR1A      | 198  | 0 | 2 | 0 | 0 | 0 | 0 |
| ENSP00000362389 | HDLBP      | 973  | 0 | 1 | 0 | 0 | 0 | 0 |
| ENSP00000362576 | YARS       | 528  | 0 | 2 | 0 | 0 | 1 | 0 |
| ENSP00000362664 | GIGYF2     | 1299 | 0 | 2 | 1 | 0 | 0 | 1 |
| ENSP00000362727 | DENND1A    | 1009 | 0 | 1 | 0 | 0 | 0 | 0 |
| ENSP00000362729 | RPS4X      | 122  | 0 | 1 | 1 | 0 | 0 | 0 |
| ENSP00000362738 | PSMD1      | 922  | 0 | 1 | 0 | 1 | 1 | 0 |
| ENSP00000362805 | OGT        | 1036 | 0 | 1 | 0 | 1 | 1 | 0 |
| ENSP00000362820 | SRSF3      | 164  | 0 | 1 | 0 | 0 | 0 | 0 |

|                 |             |      |   |     |   |   |   |   |
|-----------------|-------------|------|---|-----|---|---|---|---|
| ENSP00000362873 | NDUFA8      | 172  | 0 | 1   | 0 | 0 | 0 | 0 |
| ENSP00000363041 | CISD1       | 108  | 0 | 0.5 | 0 | 0 | 1 | 0 |
| ENSP00000363052 | EPB41L1     | 880  | 0 | 1   | 0 | 0 | 0 | 0 |
| ENSP00000363169 | RPS10       | 172  | 0 | 1   | 0 | 0 | 0 | 0 |
| ENSP00000363613 | RAPH1       | 619  | 0 | 1   | 0 | 0 | 0 | 0 |
| ENSP00000363625 | LYPLA2      | 164  | 0 | 1   | 0 | 0 | 0 | 0 |
| ENSP00000363639 | TXN         | 85   | 0 | 1   | 1 | 0 | 0 | 0 |
| ENSP00000363676 | RPL11       | 178  | 0 | 1   | 0 | 0 | 2 | 1 |
| ENSP00000363752 | LUZP1       | 1076 | 0 | 1   | 0 | 0 | 0 | 0 |
| ENSP00000363818 | ZNF462      | 1449 | 0 | 1   | 0 | 0 | 0 | 0 |
| ENSP00000363905 | PARD3       | 1001 | 0 | 1   | 0 | 0 | 0 | 0 |
| ENSP00000363972 | ZC4H2       | 224  | 0 | 1   | 0 | 0 | 0 | 0 |
| ENSP00000364348 | CCDC180     | 1701 | 0 | 1   | 0 | 0 | 0 | 0 |
| ENSP00000364630 | PADI2       | 437  | 0 | 1   | 0 | 0 | 0 | 0 |
| ENSP00000364664 | SLC4A10     | 1099 | 0 | 1   | 0 | 0 | 2 | 0 |
| ENSP00000364805 | HSPA1L      | 641  | 0 | 2   | 1 | 0 | 0 | 0 |
| ENSP00000364887 | DYNC2H1     | 4307 | 0 | 1   | 0 | 0 | 0 | 0 |
| ENSP00000364943 | DDAH2       | 285  | 0 | 2   | 2 | 1 | 0 | 1 |
| ENSP00000365025 | CSNK2B      | 215  | 0 | 1   | 1 | 1 | 0 | 1 |
| ENSP00000365220 | TPP2        | 1262 | 0 | 1   | 0 | 0 | 2 | 2 |
| ENSP00000365233 | TPP2        | 1249 | 0 | 1   | 0 | 1 | 3 | 2 |
| ENSP00000365536 | AF196779.12 | 292  | 0 | 1   | 0 | 0 | 0 | 0 |
| ENSP00000365566 | PRAF2       | 160  | 0 | 1   | 0 | 0 | 0 | 0 |
| ENSP00000365569 | FLOT1       | 427  | 0 | 1   | 0 | 1 | 0 | 0 |
| ENSP00000365570 | PRAF2       | 178  | 0 | 2   | 0 | 0 | 0 | 0 |
| ENSP00000365683 | C10orf67    | 296  | 0 | 1   | 0 | 0 | 0 | 0 |
| ENSP00000365694 | PPP1R10     | 940  | 0 | 1   | 0 | 0 | 0 | 0 |
| ENSP00000366013 | GNB2L1      | 273  | 0 | 3   | 2 | 0 | 1 | 1 |
| ENSP00000366085 | MOG         | 131  | 0 | 1   | 0 | 0 | 1 | 0 |
| ENSP00000366679 | HIST1H2AH   | 128  | 0 | 1   | 0 | 0 | 0 | 1 |
| ENSP00000366819 | UCHL3       | 230  | 0 | 1   | 0 | 0 | 0 | 0 |
| ENSP00000366886 | KLHL21      | 597  | 0 | 1   | 0 | 0 | 0 | 0 |
| ENSP00000366913 | ATP2A2      | 50   | 0 | 1   | 3 | 0 | 1 | 2 |
| ENSP00000367073 | ACOT7       | 329  | 0 | 2   | 3 | 0 | 2 | 2 |
| ENSP00000367263 | AHNAK       | 5890 | 0 | 3   | 0 | 0 | 0 | 0 |
| ENSP00000367320 | TBC1D31     | 644  | 0 | 1   | 0 | 0 | 0 | 0 |
| ENSP00000367336 | RPL23       | 91   | 0 | 3   | 1 | 0 | 3 | 2 |
| ENSP00000367498 | LRRC47      | 583  | 0 | 1   | 1 | 1 | 1 | 0 |
| ENSP00000367557 | RAB4B       | 121  | 0 | 1   | 0 | 0 | 1 | 0 |
| ENSP00000367590 | REEP2       | 254  | 0 | 1   | 0 | 0 | 0 | 0 |
| ENSP00000367681 | FAM213B     | 231  | 0 | 1   | 0 | 0 | 0 | 0 |
| ENSP00000367806 | RPS16       | 152  | 0 | 2   | 0 | 1 | 1 | 0 |
| ENSP00000368025 | WDR87       | 2873 | 0 | 2   | 0 | 0 | 4 | 1 |
| ENSP00000368308 | NRCAM       | 1236 | 0 | 1   | 0 | 1 | 1 | 0 |
| ENSP00000368565 | DNAJC2      | 621  | 0 | 2   | 0 | 0 | 1 | 1 |
| ENSP00000369038 | EEF1E1      | 174  | 0 | 1   | 0 | 0 | 0 | 0 |
| ENSP00000369066 | POSTN       | 779  | 0 | 1   | 1 | 0 | 1 | 1 |
| ENSP00000369127 | DNAJA1      | 397  | 0 | 1   | 0 | 0 | 0 | 0 |
| ENSP00000369361 | KRT80       | 422  | 0 | 3   | 0 | 0 | 0 | 0 |
| ENSP00000369396 | SLC4A11     | 891  | 0 | 1   | 0 | 0 | 0 | 0 |
| ENSP00000369399 | SLC4A11     | 918  | 0 | 1   | 0 | 0 | 0 | 0 |
| ENSP00000369586 | HBE1        | 147  | 0 | 1   | 0 | 1 | 1 | 1 |
| ENSP00000369741 | RPS6        | 91   | 0 | 4   | 0 | 1 | 1 | 0 |
| ENSP00000369743 | RPS6        | 218  | 0 | 2   | 1 | 0 | 0 | 0 |
| ENSP00000369784 | TUBAL3      | 446  | 0 | 4   | 2 | 1 | 1 | 3 |
| ENSP00000369981 | SH3GL2      | 352  | 0 | 5   | 1 | 3 | 5 | 3 |
| ENSP00000369989 | KATNAL1     | 490  | 0 | 1   | 0 | 0 | 0 | 1 |
| ENSP00000370113 | PPP2R2A     | 447  | 0 | 1   | 2 | 0 | 1 | 0 |

|                 |          |      |   |   |   |   |   |     |
|-----------------|----------|------|---|---|---|---|---|-----|
| ENSP00000370462 | PFKP     | 202  | 0 | 1 | 1 | 0 | 0 | 2   |
| ENSP00000370517 | PFKP     | 784  | 0 | 8 | 4 | 1 | 4 | 8.5 |
| ENSP00000371230 | AK3      | 227  | 0 | 1 | 0 | 0 | 0 | 0   |
| ENSP00000371236 | GART     | 1010 | 0 | 1 | 0 | 0 | 0 | 0   |
| ENSP00000371594 | GNG7     | 68   | 0 | 1 | 1 | 0 | 2 | 1   |
| ENSP00000371931 | SYNJ1    | 1526 | 0 | 3 | 0 | 2 | 1 | 3   |
| ENSP00000372067 | PRMT8    | 394  | 0 | 1 | 0 | 0 | 1 | 0   |
| ENSP00000372750 | CHRM5    | 532  | 0 | 1 | 0 | 0 | 0 | 0   |
| ENSP00000374118 | SMG1     | 3662 | 0 | 1 | 0 | 0 | 1 | 0   |
| ENSP00000374443 | LYST     | 3801 | 0 | 1 | 1 | 1 | 2 | 0   |
| ENSP00000375097 | SBF1     | 1867 | 0 | 1 | 0 | 0 | 0 | 1   |
| ENSP00000375918 | ACSL3    | 720  | 0 | 1 | 0 | 0 | 0 | 0   |
| ENSP00000376136 | STAT1    | 712  | 0 | 1 | 0 | 0 | 0 | 0   |
| ENSP00000376176 | RAN      | 216  | 0 | 1 | 0 | 0 | 1 | 1   |
| ENSP00000376214 | PKLR     | 543  | 0 | 1 | 1 | 0 | 1 | 1   |
| ENSP00000376297 | DYNLL1   | 89   | 0 | 3 | 3 | 1 | 3 | 6   |
| ENSP00000376369 | CDCA4    | 241  | 0 | 1 | 0 | 0 | 0 | 0   |
| ENSP00000376399 | S100A13  | 98   | 0 | 2 | 2 | 0 | 0 | 1   |
| ENSP00000376493 | MECOM    | 1051 | 0 | 1 | 1 | 0 | 0 | 0   |
| ENSP00000376506 | PDCD10   | 212  | 0 | 1 | 0 | 0 | 0 | 0   |
| ENSP00000376620 | WARS     | 471  | 0 | 1 | 0 | 0 | 1 | 0   |
| ENSP00000376996 | GCC2     | 247  | 0 | 1 | 0 | 0 | 0 | 1   |
| ENSP00000377298 | NUMA1    | 2115 | 0 | 1 | 0 | 0 | 0 | 0   |
| ENSP00000377403 | GRIA2    | 836  | 0 | 2 | 0 | 2 | 0 | 0   |
| ENSP00000377527 | PC       | 1178 | 0 | 2 | 0 | 0 | 3 | 0   |
| ENSP00000377546 | KRT15    | 456  | 0 | 1 | 0 | 0 | 0 | 0   |
| ENSP00000377616 | KRT222   | 295  | 0 | 1 | 1 | 0 | 0 | 0   |
| ENSP00000377723 | GLTSCR1L | 1079 | 0 | 1 | 1 | 2 | 1 | 0   |
| ENSP00000377865 | RPL23    | 140  | 0 | 1 | 0 | 0 | 0 | 1   |
| ENSP00000378057 | EFEMP1   | 493  | 0 | 1 | 0 | 0 | 1 | 0   |
| ENSP00000378160 | RPL34    | 117  | 0 | 1 | 0 | 0 | 0 | 0   |
| ENSP00000378279 | MATR3    | 895  | 0 | 1 | 0 | 0 | 0 | 0   |
| ENSP00000378487 | VDAC1    | 283  | 0 | 1 | 0 | 0 | 0 | 0   |
| ENSP00000378514 | PPM1A    | 382  | 0 | 1 | 0 | 0 | 0 | 0   |
| ENSP00000378625 | MAPK3    | 357  | 0 | 4 | 3 | 0 | 3 | 1   |
| ENSP00000378626 | MAPK3    | 311  | 0 | 1 | 1 | 0 | 0 | 0   |
| ENSP00000378628 | MAPK3    | 335  | 0 | 1 | 0 | 0 | 0 | 0   |
| ENSP00000378669 | ALDOA    | 418  | 0 | 1 | 2 | 2 | 3 | 6   |
| ENSP00000378740 | ASL      | 444  | 0 | 1 | 0 | 0 | 0 | 0   |
| ENSP00000379051 | PURB     | 312  | 0 | 1 | 1 | 0 | 0 | 1   |
| ENSP00000379704 | SEPT3    | 358  | 0 | 1 | 0 | 0 | 0 | 0   |
| ENSP00000379729 | RPL7     | 208  | 0 | 2 | 0 | 0 | 0 | 0   |
| ENSP00000379888 | RPS8     | 208  | 0 | 1 | 1 | 0 | 2 | 1   |
| ENSP00000379969 | OTUD5    | 566  | 0 | 1 | 0 | 0 | 0 | 0   |
| ENSP00000380070 | GAPDH    | 335  | 0 | 3 | 1 | 0 | 1 | 0   |
| ENSP00000380158 | RPL32    | 135  | 0 | 1 | 0 | 0 | 1 | 1   |
| ENSP00000380175 | RHOG     | 191  | 0 | 2 | 0 | 0 | 1 | 3   |
| ENSP00000380746 | FBXL16   | 479  | 0 | 1 | 0 | 0 | 0 | 0   |
| ENSP00000380769 | S100B    | 92   | 0 | 1 | 0 | 2 | 1 | 1   |
| ENSP00000380938 | CEP290   | 1539 | 0 | 1 | 0 | 0 | 0 | 0   |
| ENSP00000381047 | C21orf2  | 375  | 0 | 1 | 0 | 0 | 0 | 0   |
| ENSP00000381064 | INTS10   | 710  | 0 | 1 | 0 | 0 | 0 | 0   |
| ENSP00000381167 | DYNC2H1  | 4314 | 0 | 1 | 0 | 0 | 0 | 0   |
| ENSP00000381206 | RDH16    | 317  | 0 | 1 | 0 | 0 | 0 | 0   |
| ENSP00000381402 | GPM6B    | 179  | 0 | 4 | 3 | 0 | 0 | 2   |
| ENSP00000381461 | PPME1    | 400  | 0 | 1 | 0 | 1 | 0 | 0   |
| ENSP00000381604 | GSTP1    | 174  | 0 | 2 | 0 | 0 | 0 | 0   |
| ENSP00000381607 | GSTP1    | 210  | 0 | 3 | 0 | 0 | 1 | 0   |

|                 |           |      |   |   |   |   |   |   |
|-----------------|-----------|------|---|---|---|---|---|---|
| ENSP00000381982 | FER1L6    | 1857 | 0 | 1 | 0 | 0 | 0 | 0 |
| ENSP00000382030 | RAD51AP2  | 1159 | 0 | 1 | 0 | 0 | 0 | 0 |
| ENSP00000382174 | MYO5A     | 228  | 0 | 1 | 0 | 0 | 0 | 0 |
| ENSP00000382177 | MYO5A     | 1855 | 0 | 1 | 0 | 0 | 0 | 0 |
| ENSP00000382341 | RABGGTA   | 567  | 0 | 1 | 1 | 0 | 0 | 0 |
| ENSP00000382362 | PHB2      | 299  | 0 | 1 | 0 | 0 | 0 | 0 |
| ENSP00000382857 | USP16     | 822  | 0 | 1 | 0 | 0 | 0 | 0 |
| ENSP00000383125 | USP14     | 483  | 0 | 1 | 0 | 0 | 0 | 0 |
| ENSP00000383702 | VAMP1     | 116  | 0 | 1 | 1 | 0 | 1 | 2 |
| ENSP00000383937 | RPS9      | 139  | 0 | 1 | 0 | 1 | 0 | 0 |
| ENSP00000384062 | ATL2      | 412  | 0 | 2 | 2 | 0 | 0 | 1 |
| ENSP00000384371 | BCL6      | 706  | 0 | 1 | 0 | 1 | 0 | 0 |
| ENSP00000384582 | GPR98     | 6306 | 0 | 1 | 1 | 0 | 0 | 0 |
| ENSP00000384863 | XPO1      | 1071 | 0 | 2 | 0 | 1 | 0 | 0 |
| ENSP00000385018 | RPS7      | 194  | 0 | 3 | 0 | 0 | 0 | 3 |
| ENSP00000385152 | KIAA1671  | 1806 | 0 | 1 | 0 | 0 | 0 | 0 |
| ENSP00000385181 | AAK1      | 863  | 0 | 2 | 0 | 0 | 0 | 0 |
| ENSP00000385286 | RPS7      | 194  | 0 | 1 | 0 | 0 | 0 | 3 |
| ENSP00000385404 | ACP1      | 112  | 0 | 1 | 0 | 0 | 0 | 0 |
| ENSP00000385432 | SAR1B     | 198  | 0 | 2 | 0 | 0 | 0 | 0 |
| ENSP00000385498 | PPP1R7    | 274  | 0 | 1 | 0 | 1 | 1 | 0 |
| ENSP00000385549 | DPYSL5    | 564  | 0 | 1 | 1 | 3 | 1 | 1 |
| ENSP00000385880 | PFKP      | 210  | 0 | 7 | 5 | 0 | 8 | 6 |
| ENSP00000386153 | RAP1GDS1  | 607  | 0 | 1 | 1 | 0 | 0 | 1 |
| ENSP00000386223 | RAP1GDS1  | 558  | 0 | 1 | 0 | 0 | 0 | 0 |
| ENSP00000386452 | C17orf104 | 952  | 0 | 1 | 0 | 0 | 0 | 0 |
| ENSP00000386458 | PRPF40A   | 930  | 0 | 1 | 0 | 0 | 0 | 0 |
| ENSP00000386770 | DNAH10    | 4471 | 0 | 1 | 0 | 0 | 0 | 0 |
| ENSP00000386840 | XIRP2     | 3549 | 0 | 2 | 1 | 1 | 0 | 1 |
| ENSP00000386929 | ACTG2     | 333  | 0 | 9 | 3 | 3 | 3 | 7 |
| ENSP00000386957 | KIAA1107  | 1409 | 0 | 1 | 0 | 0 | 0 | 0 |
| ENSP00000386969 | SERPINE2  | 397  | 0 | 1 | 0 | 0 | 0 | 0 |
| ENSP00000387120 | RPL31     | 79   | 0 | 1 | 0 | 0 | 0 | 0 |
| ENSP00000387123 | ALDH7A1   | 539  | 0 | 1 | 0 | 0 | 0 | 0 |
| ENSP00000387140 | HK2       | 889  | 0 | 1 | 0 | 0 | 1 | 0 |
| ENSP00000387189 | TCEB2     | 113  | 0 | 1 | 0 | 0 | 0 | 0 |
| ENSP00000387279 | CYCS      | 105  | 0 | 1 | 0 | 1 | 0 | 1 |
| ENSP00000387307 | RAB6C     | 254  | 0 | 2 | 0 | 0 | 0 | 2 |
| ENSP00000387348 | CBX3      | 101  | 0 | 1 | 0 | 0 | 0 | 0 |
| ENSP00000387682 | NME1      | 60   | 0 | 1 | 0 | 0 | 0 | 0 |
| ENSP00000387727 | NCOR1     | 537  | 0 | 1 | 0 | 0 | 0 | 0 |
| ENSP00000387904 | KRT4      | 500  | 0 | 2 | 6 | 2 | 0 | 0 |
| ENSP00000387943 | DDAH2     | 226  | 0 | 1 | 1 | 1 | 0 | 1 |
| ENSP00000388009 | LEFTY2    | 332  | 0 | 1 | 0 | 0 | 0 | 0 |
| ENSP00000388353 | ATP6V1B1  | 496  | 0 | 4 | 2 | 1 | 3 | 2 |
| ENSP00000388529 | RPL15     | 204  | 0 | 1 | 0 | 0 | 0 | 0 |
| ENSP00000388538 | APP       | 660  | 0 | 1 | 3 | 0 | 3 | 0 |
| ENSP00000388742 | PAFAH1B2  | 132  | 0 | 1 | 1 | 1 | 1 | 2 |
| ENSP00000388856 | HPCAL1    | 103  | 0 | 1 | 0 | 0 | 0 | 0 |
| ENSP00000388942 | SCRN1     | 434  | 0 | 1 | 0 | 0 | 0 | 0 |
| ENSP00000388990 | GLS       | 114  | 0 | 2 | 0 | 0 | 0 | 0 |
| ENSP00000389033 | CAV1      | 138  | 0 | 1 | 0 | 0 | 0 | 0 |
| ENSP00000389090 | PTGES3    | 124  | 0 | 5 | 0 | 1 | 2 | 2 |
| ENSP00000389103 | RPL23A    | 156  | 0 | 1 | 0 | 1 | 5 | 1 |
| ENSP00000389351 | RPSA      | 300  | 0 | 1 | 1 | 0 | 0 | 0 |
| ENSP00000389602 | RNPEP     | 344  | 0 | 1 | 1 | 0 | 3 | 1 |
| ENSP00000390077 | GNB2      | 232  | 0 | 1 | 5 | 1 | 0 | 1 |
| ENSP00000390090 | DNM1L     | 156  | 0 | 1 | 0 | 0 | 1 | 0 |

|                 |          |      |   |   |   |   |   |   |
|-----------------|----------|------|---|---|---|---|---|---|
| ENSP00000390138 | RGS7     | 393  | 0 | 2 | 0 | 0 | 1 | 0 |
| ENSP00000390148 | ATP6V1G2 | 158  | 0 | 2 | 0 | 0 | 2 | 3 |
| ENSP00000390630 | RIMBP3C  | 1639 | 0 | 1 | 0 | 0 | 0 | 0 |
| ENSP00000390839 | RPL11    | 131  | 0 | 1 | 0 | 0 | 0 | 0 |
| ENSP00000390975 | SYNE1    | 8749 | 0 | 1 | 1 | 0 | 0 | 0 |
| ENSP00000391056 | SYT1     | 419  | 0 | 4 | 5 | 0 | 8 | 3 |
| ENSP00000391160 | TAGLN3   | 199  | 0 | 1 | 0 | 0 | 1 | 0 |
| ENSP00000391316 | GPX1     | 98   | 0 | 1 | 0 | 0 | 0 | 0 |
| ENSP00000391444 | ST7      | 62   | 0 | 1 | 0 | 0 | 0 | 0 |
| ENSP00000392314 | AK1      | 135  | 0 | 3 | 0 | 0 | 3 | 1 |
| ENSP00000392349 | RPS18    | 34   | 0 | 2 | 0 | 1 | 0 | 0 |
| ENSP00000392618 | GPR98    | 1967 | 0 | 1 | 1 | 0 | 0 | 0 |
| ENSP00000392718 | POTEI    | 1075 | 0 | 1 | 2 | 0 | 0 | 0 |
| ENSP00000392735 | AP1B1    | 173  | 0 | 2 | 1 | 0 | 0 | 0 |
| ENSP00000393417 | CASP14   | 242  | 0 | 1 | 0 | 0 | 0 | 0 |
| ENSP00000393485 | ATIC     | 200  | 0 | 1 | 1 | 0 | 0 | 0 |
| ENSP00000393496 | ATP5O    | 74   | 0 | 1 | 0 | 0 | 0 | 0 |
| ENSP00000393527 | POR      | 725  | 0 | 1 | 0 | 0 | 0 | 0 |
| ENSP00000393611 | FXD1     | 92   | 0 | 1 | 1 | 0 | 0 | 0 |
| ENSP00000394041 | PRKAR2A  | 404  | 0 | 2 | 1 | 0 | 3 | 0 |
| ENSP00000394213 | ACTR3    | 41   | 0 | 3 | 1 | 0 | 1 | 0 |
| ENSP00000394470 | GNB2L1   | 153  | 0 | 1 | 1 | 0 | 0 | 0 |
| ENSP00000394546 | NHSL1    | 1610 | 0 | 1 | 0 | 0 | 0 | 0 |
| ENSP00000394873 | MOG      | 131  | 0 | 1 | 0 | 0 | 1 | 0 |
| ENSP00000395451 | PYGB     | 245  | 0 | 6 | 1 | 1 | 6 | 3 |
| ENSP00000395472 | RANBP1   | 163  | 0 | 1 | 0 | 0 | 0 | 0 |
| ENSP00000395791 | RHOC     | 91   | 0 | 1 | 0 | 0 | 0 | 0 |
| ENSP00000396212 | TUBA4A   | 156  | 0 | 1 | 0 | 1 | 2 | 0 |
| ENSP00000396249 | ABI2     | 480  | 0 | 1 | 0 | 0 | 0 | 0 |
| ENSP00000396475 | ARPC2    | 91   | 0 | 1 | 1 | 1 | 1 | 0 |
| ENSP00000396707 | CKMT1B   | 103  | 0 | 1 | 0 | 1 | 1 | 0 |
| ENSP00000397555 | R3HCC1   | 480  | 0 | 1 | 0 | 0 | 0 | 0 |
| ENSP00000397937 | CAMK2B   | 542  | 0 | 4 | 1 | 1 | 1 | 0 |
| ENSP00000398147 | FKBP2    | 142  | 0 | 1 | 1 | 0 | 0 | 0 |
| ENSP00000398487 | ABI2     | 44   | 0 | 1 | 0 | 0 | 0 | 0 |
| ENSP00000398629 | GNG4     | 75   | 0 | 1 | 0 | 0 | 0 | 0 |
| ENSP00000398812 | FKBPL    | 349  | 0 | 1 | 0 | 0 | 1 | 0 |
| ENSP00000398839 | PPP1CB   | 125  | 0 | 1 | 2 | 2 | 1 | 0 |
| ENSP00000398888 | RPL11    | 174  | 0 | 2 | 0 | 0 | 2 | 1 |
| ENSP00000399058 | DNAJC2   | 188  | 0 | 1 | 1 | 0 | 0 | 0 |
| ENSP00000399119 | QARS     | 282  | 0 | 1 | 0 | 0 | 0 | 0 |
| ENSP00000399177 | DHDDS    | 198  | 0 | 1 | 0 | 0 | 0 | 0 |
| ENSP00000399357 | DDAH2    | 285  | 0 | 1 | 1 | 0 | 0 | 0 |
| ENSP00000399610 | RYR3     | 4865 | 0 | 1 | 0 | 0 | 0 | 0 |
| ENSP00000399698 | SAR1A    | 198  | 0 | 2 | 0 | 0 | 0 | 0 |
| ENSP00000399838 | BPGM     | 259  | 0 | 1 | 0 | 0 | 1 | 0 |
| ENSP00000399862 | CNOT10   | 804  | 0 | 1 | 0 | 0 | 0 | 0 |
| ENSP00000400764 | TST      | 124  | 0 | 1 | 1 | 1 | 0 | 1 |
| ENSP00000400887 | PPIP5K1  | 1433 | 0 | 1 | 0 | 0 | 0 | 0 |
| ENSP00000401559 | SYT1     | 181  | 0 | 2 | 3 | 0 | 2 | 1 |
| ENSP00000401614 | UBP1     | 148  | 0 | 2 | 0 | 0 | 2 | 0 |
| ENSP00000401779 | SNX3     | 130  | 0 | 1 | 0 | 0 | 0 | 0 |
| ENSP00000402024 | IL2RA    | 109  | 0 | 1 | 0 | 0 | 0 | 0 |
| ENSP00000402126 | PRPSAP1  | 104  | 0 | 1 | 0 | 0 | 0 | 0 |
| ENSP00000402425 | CD59     | 128  | 0 | 2 | 0 | 1 | 1 | 1 |
| ENSP00000402430 | ATP6V1G2 | 78   | 0 | 1 | 0 | 0 | 0 | 0 |
| ENSP00000402446 | WDR64    | 914  | 0 | 1 | 1 | 0 | 1 | 1 |
| ENSP00000402478 | HSPD1    | 83   | 0 | 1 | 0 | 0 | 1 | 0 |

|                 |          |      |   |     |   |   |   |   |
|-----------------|----------|------|---|-----|---|---|---|---|
| ENSP00000402515 | SMG1     | 3661 | 0 | 1   | 0 | 0 | 1 | 0 |
| ENSP00000402854 | DDAH2    | 188  | 0 | 1   | 1 | 0 | 0 | 0 |
| ENSP00000402996 | ARL8B    | 163  | 0 | 1.5 | 0 | 0 | 0 | 0 |
| ENSP00000403154 | DDAH2    | 285  | 0 | 1   | 0 | 0 | 0 | 0 |
| ENSP00000403172 | RPL6     | 288  | 0 | 1   | 1 | 0 | 1 | 0 |
| ENSP00000404042 | TMED4    | 227  | 0 | 1   | 2 | 1 | 0 | 0 |
| ENSP00000404227 | NIPSNAP1 | 128  | 0 | 2   | 1 | 0 | 0 | 0 |
| ENSP00000404309 | SIRT2    | 237  | 0 | 2   | 0 | 0 | 1 | 0 |
| ENSP00000404375 | RPL36A   | 142  | 0 | 2   | 0 | 0 | 0 | 0 |
| ENSP00000404616 | PDHA1    | 121  | 0 | 3   | 2 | 1 | 0 | 1 |
| ENSP00000404631 | CACNA2D2 | 1144 | 0 | 1   | 0 | 4 | 2 | 1 |
| ENSP00000404864 | OLA1     | 103  | 0 | 1   | 0 | 0 | 0 | 0 |
| ENSP00000404866 | ECHDC1   | 226  | 0 | 2   | 1 | 0 | 0 | 0 |
| ENSP00000404944 | EHD1     | 374  | 0 | 2   | 2 | 1 | 0 | 0 |
| ENSP00000404978 | NEDD1    | 660  | 0 | 1   | 0 | 0 | 0 | 0 |
| ENSP00000405033 | TRAPPC4  | 165  | 0 | 1   | 0 | 0 | 0 | 0 |
| ENSP00000406112 | CALM2    | 65   | 0 | 2   | 1 | 1 | 2 | 1 |
| ENSP00000406372 | ATP6V1G2 | 118  | 0 | 1   | 0 | 0 | 0 | 2 |
| ENSP00000407034 | PRDX1    | 171  | 0 | 1   | 0 | 0 | 0 | 0 |
| ENSP00000407310 | PPP1R10  | 940  | 0 | 1   | 0 | 0 | 0 | 0 |
| ENSP00000407552 | GAS7     | 476  | 0 | 1   | 0 | 0 | 0 | 0 |
| ENSP00000407821 | MYH11    | 1945 | 0 | 1   | 0 | 0 | 0 | 0 |
| ENSP00000407872 | RAB18    | 291  | 0 | 2   | 0 | 0 | 1 | 0 |
| ENSP00000408468 | YWHAH    | 39   | 0 | 3   | 2 | 0 | 1 | 0 |
| ENSP00000408578 | ARPC1A   | 345  | 0 | 1   | 0 | 0 | 0 | 1 |
| ENSP00000408678 | SEPT5    | 301  | 0 | 3   | 2 | 0 | 0 | 0 |
| ENSP00000408796 | SAMD9L   | 1584 | 0 | 1   | 1 | 0 | 0 | 0 |
| ENSP00000409424 | RGPD6    | 56   | 0 | 1   | 0 | 0 | 0 | 0 |
| ENSP00000409510 | CSNK2B   | 215  | 0 | 1   | 1 | 1 | 0 | 0 |
| ENSP00000409811 | ATL2     | 175  | 0 | 1   | 1 | 0 | 0 | 0 |
| ENSP00000409967 | FSCN1    | 120  | 0 | 1   | 0 | 0 | 0 | 0 |
| ENSP00000410208 | GORASP2  | 464  | 0 | 1   | 0 | 0 | 0 | 0 |
| ENSP00000410240 | RPL37A   | 68   | 0 | 1   | 0 | 0 | 2 | 1 |
| ENSP00000410249 | XPO7     | 1088 | 0 | 1   | 0 | 0 | 0 | 0 |
| ENSP00000410465 | HMGB1    | 97   | 0 | 1   | 0 | 0 | 0 | 0 |
| ENSP00000410848 | RPSA     | 263  | 0 | 2   | 2 | 3 | 0 | 0 |
| ENSP00000411121 | ACP1     | 70   | 0 | 1   | 0 | 0 | 0 | 0 |
| ENSP00000411176 | RPL15    | 175  | 0 | 1   | 0 | 0 | 0 | 0 |
| ENSP00000411251 | DCTN4    | 403  | 0 | 1   | 0 | 0 | 0 | 0 |
| ENSP00000411719 | MPST     | 297  | 0 | 1   | 0 | 0 | 0 | 0 |
| ENSP00000412083 | ERP29    | 53   | 0 | 2   | 0 | 1 | 1 | 1 |
| ENSP00000412646 | TUBA8    | 467  | 0 | 1   | 0 | 0 | 3 | 3 |
| ENSP00000412663 | GSK3A    | 483  | 0 | 1   | 0 | 0 | 0 | 0 |
| ENSP00000412976 | RPL31    | 115  | 0 | 4   | 0 | 0 | 3 | 2 |
| ENSP00000413502 | RANBP1   | 145  | 0 | 2   | 0 | 0 | 0 | 1 |
| ENSP00000413600 | NAPB     | 259  | 0 | 2   | 2 | 2 | 1 | 1 |
| ENSP00000413642 | CNTN4    | 1026 | 0 | 1   | 0 | 1 | 0 | 0 |
| ENSP00000414363 | EEF1E1   | 139  | 0 | 1   | 0 | 0 | 0 | 0 |
| ENSP00000414507 | PRMT8    | 385  | 0 | 1   | 0 | 0 | 1 | 0 |
| ENSP00000414568 | OLA1     | 116  | 0 | 2   | 0 | 2 | 1 | 0 |
| ENSP00000414892 | PTGES3   | 139  | 0 | 3   | 0 | 0 | 1 | 1 |
| ENSP00000414918 | PPP1CB   | 138  | 0 | 1   | 1 | 0 | 0 | 0 |
| ENSP00000415033 | UBA1     | 270  | 0 | 1   | 0 | 1 | 1 | 0 |
| ENSP00000415491 | PHYHIP   | 330  | 0 | 1.5 | 0 | 0 | 0 | 0 |
| ENSP00000415949 | HK1      | 290  | 0 | 1   | 1 | 1 | 2 | 3 |
| ENSP00000416110 | RPS18    | 152  | 0 | 3   | 0 | 0 | 5 | 0 |
| ENSP00000416355 | FLOT1    | 238  | 0 | 1   | 0 | 0 | 0 | 0 |
| ENSP00000416479 | CYCS     | 101  | 0 | 1   | 0 | 0 | 0 | 1 |

|                 |           |      |   |   |   |   |   |   |
|-----------------|-----------|------|---|---|---|---|---|---|
| ENSP00000416706 | ACTBL2    | 376  | 0 | 7 | 9 | 3 | 8 | 4 |
| ENSP00000417175 | VAPB      | 243  | 0 | 3 | 2 | 2 | 4 | 1 |
| ENSP00000417443 | TMED4     | 186  | 0 | 1 | 1 | 0 | 0 | 0 |
| ENSP00000417445 | ERC2      | 957  | 0 | 1 | 0 | 0 | 0 | 0 |
| ENSP00000417495 | TFAP2A    | 328  | 0 | 1 | 0 | 0 | 0 | 0 |
| ENSP00000417568 | CADPS     | 190  | 0 | 4 | 0 | 4 | 0 | 0 |
| ENSP00000417762 | SELT      | 137  | 0 | 1 | 0 | 0 | 0 | 0 |
| ENSP00000417904 | TAGLN3    | 115  | 0 | 1 | 0 | 0 | 0 | 0 |
| ENSP00000417932 | SELT      | 137  | 0 | 1 | 0 | 0 | 0 | 0 |
| ENSP00000418082 | RPL37A    | 92   | 0 | 1 | 0 | 0 | 2 | 1 |
| ENSP00000418137 | DNAH12    | 2316 | 0 | 1 | 1 | 0 | 1 | 0 |
| ENSP00000418161 | RHEB      | 79   | 0 | 1 | 0 | 0 | 1 | 0 |
| ENSP00000418512 | SRI       | 155  | 0 | 1 | 0 | 0 | 0 | 0 |
| ENSP00000418523 | PFN2      | 91   | 0 | 1 | 2 | 0 | 1 | 0 |
| ENSP00000418537 | ADCY5     | 919  | 0 | 1 | 0 | 0 | 0 | 0 |
| ENSP00000418540 | RAB6B     | 71   | 0 | 2 | 0 | 1 | 0 | 1 |
| ENSP00000418894 | PARP9     | 710  | 0 | 1 | 0 | 0 | 0 | 0 |
| ENSP00000418929 | SYNPR     | 202  | 0 | 1 | 0 | 0 | 0 | 0 |
| ENSP00000419021 | ARL6IP5   | 59   | 0 | 1 | 0 | 0 | 0 | 0 |
| ENSP00000419346 | AHCYL2    | 518  | 0 | 1 | 0 | 1 | 0 | 0 |
| ENSP00000419380 | PRPS2     | 200  | 0 | 1 | 0 | 0 | 0 | 0 |
| ENSP00000419381 | RAB6B     | 195  | 0 | 2 | 0 | 1 | 5 | 0 |
| ENSP00000419740 | NSUN4     | 384  | 0 | 1 | 0 | 0 | 0 | 0 |
| ENSP00000419941 | RAB6B     | 124  | 0 | 2 | 0 | 0 | 0 | 0 |
| ENSP00000420311 | RPL23     | 140  | 0 | 1 | 0 | 0 | 0 | 0 |
| ENSP00000420392 | RFC2      | 52   | 0 | 1 | 0 | 0 | 0 | 0 |
| ENSP00000420417 | PFN2      | 91   | 0 | 1 | 1 | 0 | 1 | 0 |
| ENSP00000420675 | TAGLN3    | 163  | 0 | 4 | 0 | 2 | 2 | 2 |
| ENSP00000420900 | RPS23     | 55   | 0 | 1 | 0 | 0 | 0 | 0 |
| ENSP00000421027 | ALB       | 459  | 0 | 1 | 0 | 0 | 0 | 0 |
| ENSP00000421107 | CANX      | 308  | 0 | 1 | 1 | 3 | 1 | 1 |
| ENSP00000421340 | CDV3      | 188  | 0 | 1 | 0 | 0 | 0 | 0 |
| ENSP00000421351 | UBE2V1    | 89   | 0 | 1 | 0 | 0 | 1 | 0 |
| ENSP00000421458 | ENSA      | 105  | 0 | 1 | 0 | 0 | 0 | 0 |
| ENSP00000421465 | DBN1      | 124  | 0 | 3 | 0 | 0 | 0 | 0 |
| ENSP00000421892 | HSPA9     | 102  | 0 | 1 | 2 | 0 | 2 | 2 |
| ENSP00000422078 | SUB1      | 127  | 0 | 1 | 0 | 0 | 0 | 0 |
| ENSP00000422374 | PPP2R2C   | 430  | 0 | 1 | 1 | 0 | 1 | 0 |
| ENSP00000422768 | GNB2L1    | 269  | 0 | 3 | 3 | 0 | 1 | 1 |
| ENSP00000422784 | ALB       | 604  | 0 | 2 | 0 | 1 | 0 | 0 |
| ENSP00000423144 | OXCT1     | 123  | 0 | 1 | 0 | 0 | 0 | 0 |
| ENSP00000423316 | RPL34     | 117  | 0 | 2 | 0 | 0 | 0 | 0 |
| ENSP00000423348 | UCHL1     | 156  | 0 | 1 | 0 | 0 | 1 | 0 |
| ENSP00000423485 | GNPDA1    | 289  | 0 | 1 | 0 | 0 | 0 | 0 |
| ENSP00000423977 | EIF4E     | 245  | 0 | 1 | 2 | 0 | 0 | 1 |
| ENSP00000424419 | UFSP2     | 112  | 0 | 1 | 0 | 0 | 0 | 0 |
| ENSP00000424494 | ATP2B2    | 1154 | 0 | 2 | 2 | 2 | 2 | 3 |
| ENSP00000424796 | RPL9      | 91   | 0 | 2 | 0 | 0 | 0 | 0 |
| ENSP00000424925 | SEPT11    | 432  | 0 | 1 | 1 | 0 | 1 | 0 |
| ENSP00000425466 | SAR1B     | 170  | 0 | 2 | 0 | 0 | 0 | 0 |
| ENSP00000425561 | EIF4E     | 248  | 0 | 1 | 1 | 0 | 0 | 0 |
| ENSP00000425581 | NME1-NME2 | 152  | 0 | 4 | 0 | 2 | 1 | 1 |
| ENSP00000425732 | HNRNPH1   | 172  | 0 | 1 | 3 | 0 | 1 | 0 |
| ENSP00000425742 | CRMP1     | 570  | 0 | 3 | 0 | 0 | 1 | 0 |
| ENSP00000425841 | WDR70     | 387  | 0 | 1 | 0 | 0 | 0 | 0 |
| ENSP00000425865 | RPS23     | 134  | 0 | 1 | 0 | 0 | 0 | 0 |
| ENSP00000426101 | GNB2L1    | 233  | 0 | 1 | 2 | 0 | 1 | 1 |
| ENSP00000426377 | QDPR      | 162  | 0 | 5 | 3 | 2 | 6 | 3 |



|                 |          |      |   |     |   |   |   |   |
|-----------------|----------|------|---|-----|---|---|---|---|
| ENSP00000426470 | CTBP1    | 202  | 0 | 1   | 0 | 0 | 0 | 1 |
| ENSP00000426555 | CANX     | 131  | 0 | 1   | 1 | 1 | 0 | 1 |
| ENSP00000426658 | REEP2    | 191  | 0 | 1   | 0 | 0 | 0 | 0 |
| ENSP00000426715 | VCAN     | 354  | 0 | 1   | 0 | 0 | 1 | 0 |
| ENSP00000426895 | UCHL1    | 207  | 0 | 1   | 2 | 1 | 0 | 1 |
| ENSP00000427388 | HNRNPH1  | 168  | 0 | 1   | 1 | 0 | 0 | 1 |
| ENSP00000427463 | SPCS3    | 180  | 0 | 2   | 0 | 0 | 0 | 0 |
| ENSP00000427499 | HINT1    | 103  | 0 | 3   | 2 | 0 | 2 | 2 |
| ENSP00000427572 | EEF1E1   | 136  | 0 | 1   | 0 | 0 | 0 | 0 |
| ENSP00000427687 | WDR1     | 606  | 0 | 1   | 1 | 1 | 2 | 4 |
| ENSP00000427713 | ERGIC1   | 138  | 0 | 1   | 0 | 0 | 1 | 0 |
| ENSP00000427778 | PROSC    | 152  | 0 | 1   | 0 | 0 | 1 | 0 |
| ENSP00000427886 | PROSC    | 137  | 0 | 1   | 1 | 1 | 1 | 0 |
| ENSP00000428061 | LUZP1    | 273  | 0 | 1   | 0 | 0 | 0 | 0 |
| ENSP00000428093 | NCALD    | 74   | 0 | 1   | 0 | 1 | 0 | 0 |
| ENSP00000428141 | ATP6V1E2 | 226  | 0 | 2   | 1 | 1 | 2 | 1 |
| ENSP00000428487 | TNIP1    | 257  | 0 | 1   | 0 | 0 | 0 | 0 |
| ENSP00000428509 | RPS14    | 151  | 0 | 1   | 0 | 0 | 0 | 0 |
| ENSP00000428589 | LARP1    | 815  | 0 | 3   | 0 | 0 | 0 | 4 |
| ENSP00000428604 | NDST1    | 825  | 0 | 1   | 0 | 0 | 0 | 0 |
| ENSP00000428642 | PPP1R3B  | 285  | 0 | 1   | 0 | 0 | 0 | 0 |
| ENSP00000429279 | PPP2R2A  | 132  | 0 | 1   | 1 | 1 | 1 | 0 |
| ENSP00000429283 | DOCK2    | 1322 | 0 | 1   | 0 | 0 | 1 | 0 |
| ENSP00000429333 | RPS20    | 46   | 0 | 2   | 0 | 0 | 0 | 0 |
| ENSP00000429350 | PPP3CA   | 454  | 0 | 1   | 0 | 1 | 1 | 0 |
| ENSP00000429374 | RPS20    | 142  | 0 | 1   | 0 | 0 | 0 | 0 |
| ENSP00000429415 | SKP1     | 142  | 0 | 1   | 0 | 0 | 0 | 0 |
| ENSP00000429436 | POLB     | 193  | 0 | 1   | 0 | 0 | 0 | 0 |
| ENSP00000429473 | HS6ST2   | 645  | 0 | 1   | 0 | 0 | 0 | 0 |
| ENSP00000429861 | CCDC25   | 86   | 0 | 2   | 1 | 0 | 0 | 0 |
| ENSP00000429906 | TCEB1    | 112  | 0 | 2   | 1 | 0 | 3 | 4 |
| ENSP00000430174 | ANK1     | 1040 | 0 | 1   | 0 | 0 | 0 | 0 |
| ENSP00000430267 | DPYSL3   | 209  | 0 | 2   | 1 | 1 | 2 | 1 |
| ENSP00000430491 | UBE2V2   | 154  | 0 | 2   | 0 | 0 | 1 | 0 |
| ENSP00000430971 | TNIP1    | 635  | 0 | 1   | 0 | 0 | 0 | 0 |
| ENSP00000430993 | DCTN4    | 134  | 0 | 1   | 0 | 0 | 0 | 0 |
| ENSP00000431144 | PSMC3    | 301  | 0 | 1   | 0 | 0 | 0 | 0 |
| ENSP00000431301 | THY1     | 161  | 0 | 1   | 1 | 0 | 0 | 0 |
| ENSP00000431567 | PCF11    | 784  | 0 | 1   | 0 | 0 | 0 | 0 |
| ENSP00000432096 | RPS13    | 116  | 0 | 1   | 0 | 0 | 0 | 0 |
| ENSP00000432153 | CFL1     | 90   | 0 | 2.5 | 0 | 1 | 2 | 1 |
| ENSP00000432362 | CD59     | 130  | 0 | 1   | 0 | 0 | 1 | 1 |
| ENSP00000432458 | RPS3     | 44   | 0 | 2   | 0 | 0 | 0 | 0 |
| ENSP00000433005 | LIPT2    | 73   | 0 | 1   | 0 | 0 | 0 | 0 |
| ENSP00000433109 | KCNA2    | 499  | 0 | 1   | 0 | 0 | 0 | 0 |
| ENSP00000433171 | ARRB1    | 257  | 0 | 1   | 0 | 0 | 1 | 0 |
| ENSP00000433316 | HSPA8    | 410  | 0 | 2   | 2 | 3 | 2 | 0 |
| ENSP00000433351 | AMPD3    | 110  | 0 | 1   | 0 | 0 | 0 | 0 |
| ENSP00000433421 | RPS3     | 231  | 0 | 3   | 3 | 3 | 2 | 1 |
| ENSP00000433480 | PRMT1    | 238  | 0 | 1   | 0 | 0 | 1 | 0 |
| ENSP00000433703 | RPL8     | 167  | 0 | 1   | 0 | 0 | 0 | 0 |
| ENSP00000434023 | HRAS     | 170  | 0 | 1   | 1 | 0 | 0 | 0 |
| ENSP00000434138 | VPS51    | 233  | 0 | 1   | 0 | 0 | 0 | 0 |
| ENSP00000434329 | PPP5C    | 485  | 0 | 1   | 0 | 0 | 0 | 0 |
| ENSP00000434535 | RPL8     | 205  | 0 | 1   | 0 | 0 | 0 | 0 |
| ENSP00000434706 | SPCS2    | 166  | 0 | 1   | 0 | 0 | 0 | 0 |
| ENSP00000435096 | RPS25    | 125  | 0 | 3   | 1 | 0 | 0 | 1 |
| ENSP00000435157 | GSTM2    | 147  | 0 | 1   | 1 | 1 | 1 | 0 |

|                 |          |      |   |     |   |   |   |   |
|-----------------|----------|------|---|-----|---|---|---|---|
| ENSP00000435238 | SYTL2    | 910  | 0 | 1   | 0 | 0 | 0 | 1 |
| ENSP00000435289 | PAFAH1B2 | 229  | 0 | 1   | 1 | 1 | 1 | 0 |
| ENSP00000435566 | RPS3     | 36   | 0 | 1   | 1 | 0 | 0 | 1 |
| ENSP00000435818 | SEPT6    | 267  | 0 | 0.5 | 1 | 1 | 0 | 0 |
| ENSP00000436059 | AP2A2    | 378  | 0 | 1   | 0 | 1 | 0 | 1 |
| ENSP00000436066 | CLP1     | 425  | 0 | 1   | 0 | 0 | 0 | 0 |
| ENSP00000436556 | RPS3     | 171  | 0 | 1   | 0 | 0 | 0 | 0 |
| ENSP00000436619 | GDA      | 454  | 0 | 1   | 0 | 0 | 1 | 0 |
| ENSP00000437130 | NAP1L4   | 107  | 0 | 1   | 0 | 0 | 0 | 0 |
| ENSP00000437168 | GBP3     | 290  | 0 | 1   | 0 | 0 | 0 | 0 |
| ENSP00000437189 | HSPA8    | 500  | 0 | 5   | 6 | 0 | 6 | 1 |
| ENSP00000437218 | CSRP1    | 153  | 0 | 4   | 0 | 2 | 1 | 2 |
| ENSP00000437457 | DENND1A  | 794  | 0 | 1   | 0 | 0 | 0 | 0 |
| ENSP00000437542 | ARHGAP44 | 591  | 0 | 1   | 0 | 0 | 0 | 0 |
| ENSP00000437607 | GLI1     | 978  | 0 | 1   | 0 | 0 | 1 | 0 |
| ENSP00000437953 | POSTN    | 749  | 0 | 1   | 1 | 0 | 1 | 1 |
| ENSP00000438063 | ARF3     | 102  | 0 | 3   | 0 | 0 | 1 | 2 |
| ENSP00000438193 | ALDH5A1  | 447  | 0 | 1   | 2 | 0 | 2 | 2 |
| ENSP00000438324 | KDM3A    | 1269 | 0 | 1   | 0 | 0 | 0 | 0 |
| ENSP00000438334 | SLC12A4  | 1054 | 0 | 1   | 1 | 0 | 2 | 0 |
| ENSP00000438457 | IDH2     | 322  | 0 | 6   | 6 | 1 | 4 | 1 |
| ENSP00000438842 | RAB6A    | 71   | 0 | 1   | 0 | 0 | 0 | 0 |
| ENSP00000438959 | RPL13    | 164  | 0 | 1   | 0 | 0 | 0 | 0 |
| ENSP00000439010 | DNAJA1   | 240  | 0 | 1   | 0 | 0 | 0 | 0 |
| ENSP00000439291 | GLUD1    | 391  | 0 | 3   | 1 | 1 | 1 | 0 |
| ENSP00000439321 | RAB18    | 142  | 0 | 1   | 0 | 0 | 1 | 0 |
| ENSP00000439447 | TCP1     | 332  | 0 | 2   | 1 | 0 | 5 | 2 |
| ENSP00000439506 | CCNT2    | 488  | 0 | 1   | 0 | 0 | 0 | 0 |
| ENSP00000440502 | DPP3     | 737  | 0 | 4   | 2 | 2 | 4 | 1 |
| ENSP00000440588 | SLC8A2   | 384  | 0 | 1   | 0 | 2 | 0 | 0 |
| ENSP00000440701 | ZNF720   | 475  | 0 | 1   | 0 | 0 | 0 | 0 |
| ENSP00000440763 | LGI1     | 509  | 0 | 2   | 1 | 0 | 2 | 0 |
| ENSP00000441179 | RPL12    | 132  | 0 | 2   | 0 | 0 | 1 | 0 |
| ENSP00000441364 | NONO     | 382  | 0 | 2   | 0 | 0 | 0 | 0 |
| ENSP00000441872 | ACOT7    | 223  | 0 | 1   | 1 | 0 | 0 | 0 |
| ENSP00000442089 | RSL1D1   | 270  | 0 | 1   | 0 | 0 | 0 | 0 |
| ENSP00000442425 | DDX31    | 160  | 0 | 1   | 0 | 0 | 0 | 0 |
| ENSP00000442699 | HTATSF1  | 755  | 0 | 1   | 0 | 1 | 0 | 0 |
| ENSP00000443014 | DUSP3    | 144  | 0 | 3   | 0 | 0 | 2 | 1 |
| ENSP00000443365 | SH3GL2   | 305  | 0 | 5   | 1 | 3 | 8 | 3 |
| ENSP00000443520 | SOX5     | 753  | 0 | 1   | 1 | 0 | 0 | 0 |
| ENSP00000444060 | RAP1B    | 127  | 0 | 1   | 0 | 0 | 0 | 0 |
| ENSP00000444566 | MDM2     | 84   | 0 | 1   | 0 | 0 | 0 | 0 |
| ENSP00000444850 | USO1     | 947  | 0 | 1   | 0 | 0 | 0 | 0 |
| ENSP00000444923 | EPSTI1   | 80   | 0 | 1   | 0 | 0 | 0 | 0 |
| ENSP00000444978 | GSTM3    | 225  | 0 | 1   | 1 | 1 | 0 | 0 |
| ENSP00000445496 | OPCML    | 354  | 0 | 1   | 2 | 2 | 1 | 1 |
| ENSP00000445788 | ENO2     | 103  | 0 | 1   | 0 | 1 | 0 | 0 |
| ENSP00000445794 | CAND1    | 442  | 0 | 2   | 0 | 0 | 0 | 2 |
| ENSP00000445912 | AK4      | 223  | 0 | 1   | 0 | 0 | 0 | 0 |
| ENSP00000446147 | IDH2     | 400  | 0 | 2   | 2 | 0 | 0 | 1 |
| ENSP00000446179 | AP3S1    | 162  | 0 | 1   | 0 | 0 | 1 | 2 |
| ENSP00000446318 | RAP1B    | 165  | 0 | 1   | 0 | 0 | 0 | 0 |
| ENSP00000446353 | ARF3     | 40   | 0 | 4   | 0 | 0 | 1 | 5 |
| ENSP00000446377 | ATP6V0A1 | 483  | 0 | 1   | 3 | 0 | 1 | 1 |
| ENSP00000446477 | CSE1L    | 754  | 0 | 3   | 1 | 1 | 1 | 1 |
| ENSP00000446519 | PFKM     | 176  | 0 | 1   | 0 | 0 | 1 | 1 |
| ENSP00000446787 | NAP1L1   | 209  | 0 | 1   | 1 | 0 | 0 | 1 |

|                 |            |      |   |     |     |   |     |   |
|-----------------|------------|------|---|-----|-----|---|-----|---|
| ENSP00000447677 | AC225613.4 | 115  | 0 | 3   | 0   | 0 | 0   | 1 |
| ENSP00000448039 | NACA       | 213  | 0 | 1   | 2   | 0 | 2.5 | 0 |
| ENSP00000448040 | GNL1       | 429  | 0 | 1   | 0   | 0 | 1   | 1 |
| ENSP00000448046 | RPLP0      | 247  | 0 | 3   | 0   | 0 | 1   | 0 |
| ENSP00000448079 | PCBP2      | 64   | 0 | 1   | 1   | 0 | 1   | 0 |
| ENSP00000448610 | DNM1L      | 725  | 0 | 2   | 2   | 0 | 3.5 | 0 |
| ENSP00000448708 | SLC25A3    | 361  | 0 | 1   | 0   | 0 | 1   | 0 |
| ENSP00000448850 | ARL1       | 164  | 0 | 2   | 0   | 0 | 0   | 0 |
| ENSP00000448861 | SYT1       | 173  | 0 | 1   | 1   | 0 | 0   | 1 |
| ENSP00000448899 | RPL18      | 133  | 0 | 3   | 0   | 1 | 0   | 1 |
| ENSP00000449622 | PFKM       | 165  | 0 | 1   | 0   | 0 | 0   | 1 |
| ENSP00000449651 | KRT5       | 132  | 0 | 1   | 1   | 0 | 0   | 0 |
| ENSP00000450239 | METTL7A    | 180  | 0 | 2   | 1   | 0 | 0   | 0 |
| ENSP00000450339 | RPS26      | 115  | 0 | 1   | 0   | 0 | 0   | 1 |
| ENSP00000450725 | HNRNPC     | 293  | 0 | 1   | 2   | 0 | 2   | 3 |
| ENSP00000450726 | TMED10     | 153  | 0 | 2   | 0   | 0 | 2   | 1 |
| ENSP00000450831 | SYNE2      | 3541 | 0 | 1   | 1   | 0 | 0   | 0 |
| ENSP00000450885 | ATP6V1D    | 148  | 0 | 2   | 2   | 1 | 2   | 0 |
| ENSP00000450977 | DGKA       | 94   | 0 | 1   | 0   | 0 | 0   | 0 |
| ENSP00000451031 | ATP6V1D    | 72   | 0 | 1   | 0   | 0 | 1   | 0 |
| ENSP00000451062 | CALM1      | 98   | 0 | 1   | 0   | 1 | 0   | 1 |
| ENSP00000451255 | NAA30      | 49   | 0 | 3   | 0   | 0 | 0   | 0 |
| ENSP00000451602 | CYP46A1    | 164  | 0 | 1   | 0   | 0 | 0   | 0 |
| ENSP00000451681 | EIF2B2     | 200  | 0 | 1   | 0   | 0 | 0   | 0 |
| ENSP00000451920 | GMFB       | 150  | 0 | 2   | 0   | 2 | 1   | 0 |
| ENSP00000452006 | NDRG2      | 357  | 0 | 7   | 5   | 2 | 5   | 3 |
| ENSP00000452188 | CFL2       | 149  | 0 | 2   | 0   | 1 | 1   | 0 |
| ENSP00000452413 | NDRG2      | 218  | 0 | 1   | 0   | 0 | 0   | 0 |
| ENSP00000452570 | SYNE2      | 6818 | 0 | 1   | 0   | 0 | 0   | 0 |
| ENSP00000452696 | RPS17      | 59   | 0 | 2   | 0   | 0 | 0   | 0 |
| ENSP00000452763 | RPL28      | 170  | 0 | 2   | 0   | 0 | 1   | 0 |
| ENSP00000453223 | AP3S2      | 205  | 0 | 1   | 0   | 0 | 0   | 0 |
| ENSP00000453285 | RPL28      | 89   | 0 | 1   | 0   | 0 | 0   | 0 |
| ENSP00000453508 | TLN2       | 2542 | 0 | 1   | 0   | 0 | 0   | 0 |
| ENSP00000453745 | CHRM5      | 532  | 0 | 1   | 0   | 0 | 0   | 0 |
| ENSP00000453764 | RPS27L     | 100  | 0 | 1   | 0   | 0 | 1   | 1 |
| ENSP00000453770 | ANXA2      | 146  | 0 | 1   | 1   | 0 | 0   | 0 |
| ENSP00000453890 | RABGGTA    | 424  | 0 | 1   | 0   | 0 | 0   | 0 |
| ENSP00000453982 | RAB8B      | 188  | 0 | 1   | 0   | 0 | 1   | 1 |
| ENSP00000454158 | BLM        | 1286 | 0 | 1   | 1   | 0 | 0   | 0 |
| ENSP00000454580 | DNAJA2     | 134  | 0 | 1   | 0   | 0 | 0   | 0 |
| ENSP00000454752 | CORO1A     | 148  | 0 | 3   | 2   | 2 | 2   | 0 |
| ENSP00000454756 | SYNGR3     | 177  | 0 | 1   | 1   | 0 | 0   | 1 |
| ENSP00000454935 | NUP93      | 132  | 0 | 1   | 0   | 0 | 0   | 0 |
| ENSP00000455009 | RPL13      | 211  | 0 | 3   | 1   | 0 | 1   | 0 |
| ENSP00000455122 | COQ7       | 194  | 0 | 1   | 0   | 0 | 0   | 0 |
| ENSP00000455199 | ULK3       | 41   | 0 | 1   | 0   | 0 | 0   | 0 |
| ENSP00000455341 | ARL6IP1    | 101  | 0 | 1   | 0   | 0 | 0   | 0 |
| ENSP00000455360 | AARS       | 280  | 0 | 1   | 0   | 1 | 4   | 1 |
| ENSP00000455552 | CORO1A     | 461  | 0 | 2   | 1   | 1 | 0   | 0 |
| ENSP00000455563 | RAB5C      | 249  | 0 | 1   | 0   | 0 | 1   | 0 |
| ENSP00000456226 | PRRT2      | 394  | 0 | 2   | 0   | 0 | 0   | 0 |
| ENSP00000456568 | PTPLAD1    | 400  | 0 | 6   | 1   | 2 | 1   | 4 |
| ENSP00000456859 | SCRIB      | 1549 | 0 | 1   | 0   | 0 | 0   | 0 |
| ENSP00000457431 | GDE1       | 108  | 0 | 1   | 1   | 0 | 0   | 0 |
| ENSP00000457433 | MYOM2      | 890  | 0 | 1   | 0   | 0 | 0   | 0 |
| ENSP00000457830 | PKM        | 162  | 0 | 2   | 0   | 0 | 2   | 0 |
| ENSP00000457972 | RAB5C      | 216  | 0 | 8.5 | 5.5 | 0 | 7   | 6 |

|                 |          |      |   |     |   |   |   |   |
|-----------------|----------|------|---|-----|---|---|---|---|
| ENSP00000457989 | NUTF2    | 127  | 0 | 1   | 0 | 0 | 1 | 3 |
| ENSP00000458307 | GGT6     | 493  | 0 | 1   | 0 | 0 | 0 | 0 |
| ENSP00000458471 | DNAH12   | 2316 | 0 | 1   | 0 | 0 | 0 | 0 |
| ENSP00000458528 | RPS15A   | 130  | 0 | 1   | 0 | 0 | 2 | 1 |
| ENSP00000458585 | MMP12    | 470  | 0 | 1   | 0 | 0 | 0 | 0 |
| ENSP00000458615 | RRAS2    | 47   | 0 | 1   | 1 | 0 | 0 | 1 |
| ENSP00000458947 | RPS9     | 194  | 0 | 2   | 0 | 0 | 1 | 0 |
| ENSP00000459115 | DLAT     | 294  | 0 | 1   | 0 | 0 | 0 | 0 |
| ENSP00000459260 | HYOU1    | 937  | 0 | 1   | 0 | 0 | 0 | 1 |
| ENSP00000459330 | KANSL1   | 122  | 0 | 1   | 0 | 0 | 0 | 0 |
| ENSP00000459529 | RAD17    | 670  | 0 | 1   | 1 | 0 | 0 | 0 |
| ENSP00000459657 | TUSC2    | 110  | 0 | 1   | 0 | 0 | 0 | 0 |
| ENSP00000459770 | GNAI2    | 303  | 0 | 1.5 | 0 | 0 | 0 | 1 |
| ENSP00000460105 | CYB5D1   | 30   | 0 | 1   | 0 | 0 | 0 | 1 |
| ENSP00000460242 | RPS25    | 125  | 0 | 1   | 0 | 0 | 0 | 0 |
| ENSP00000460363 | PFN1     | 165  | 0 | 2   | 2 | 0 | 1 | 1 |
| ENSP00000460697 | RFC2     | 28   | 0 | 1   | 0 | 0 | 0 | 0 |
| ENSP00000460860 | RPS2     | 155  | 0 | 1   | 0 | 0 | 0 | 0 |
| ENSP00000461098 | CHMP6    | 224  | 0 | 1   | 1 | 0 | 1 | 0 |
| ENSP00000461259 | RAD17    | 584  | 0 | 1   | 1 | 0 | 0 | 0 |
| ENSP00000461423 | VPS35    | 47   | 0 | 1   | 0 | 0 | 0 | 0 |
| ENSP00000461685 | RRAS2    | 166  | 0 | 1   | 1 | 0 | 2 | 2 |
| ENSP00000461688 | EIF5A    | 186  | 0 | 1   | 0 | 1 | 1 | 1 |
| ENSP00000461849 | BAZ1B    | 1483 | 0 | 1   | 0 | 0 | 0 | 1 |
| ENSP00000461910 | RPL17    | 105  | 0 | 2   | 1 | 1 | 0 | 0 |
| ENSP00000461945 | RAB31    | 195  | 0 | 2   | 0 | 1 | 3 | 1 |
| ENSP00000462316 | PDE4DIP  | 2346 | 0 | 2   | 0 | 0 | 1 | 0 |
| ENSP00000462408 | NF1      | 1656 | 0 | 1   | 1 | 0 | 1 | 1 |
| ENSP00000462433 | PIK3R5   | 880  | 0 | 1   | 0 | 0 | 0 | 0 |
| ENSP00000462495 | PSMC5    | 398  | 0 | 1   | 0 | 0 | 1 | 0 |
| ENSP00000462592 | CLTC     | 122  | 0 | 1   | 1 | 0 | 0 | 0 |
| ENSP00000462680 | PIK3R5   | 879  | 0 | 1   | 0 | 0 | 0 | 0 |
| ENSP00000462741 | EIF4A1   | 85   | 0 | 1   | 1 | 0 | 0 | 0 |
| ENSP00000463021 | RPL26    | 96   | 0 | 2   | 0 | 0 | 0 | 0 |
| ENSP00000463057 | PPIAL4G  | 164  | 0 | 1   | 0 | 0 | 1 | 1 |
| ENSP00000463190 | KPNB1    | 248  | 0 | 1   | 0 | 0 | 0 | 0 |
| ENSP00000463329 | RPL19    | 128  | 0 | 1   | 0 | 0 | 3 | 4 |
| ENSP00000463461 | SEPT4    | 225  | 0 | 1   | 1 | 0 | 1 | 0 |
| ENSP00000463801 | PSMC5    | 263  | 0 | 1   | 0 | 0 | 0 | 0 |
| ENSP00000463918 | TUBAL3   | 406  | 0 | 4   | 5 | 1 | 3 | 6 |
| ENSP00000463951 | TMCO1    | 104  | 0 | 1   | 0 | 0 | 0 | 0 |
| ENSP00000464240 | GAS7     | 416  | 0 | 1   | 0 | 0 | 0 | 0 |
| ENSP00000464612 | RPL13    | 126  | 0 | 1   | 0 | 0 | 1 | 0 |
| ENSP00000464617 | OSBPL1A  | 285  | 0 | 1   | 0 | 0 | 0 | 0 |
| ENSP00000464821 | NUDT16L1 | 198  | 0 | 3   | 0 | 1 | 0 | 0 |
| ENSP00000464989 | GPX4     | 260  | 0 | 1   | 0 | 0 | 0 | 0 |
| ENSP00000465313 | RPL22    | 47   | 0 | 2   | 0 | 0 | 2 | 0 |
| ENSP00000465719 | ACOT7    | 279  | 0 | 1   | 0 | 1 | 1 | 2 |
| ENSP00000465798 | VPS25    | 111  | 0 | 3   | 0 | 0 | 1 | 1 |
| ENSP00000465875 | NCAM1    | 228  | 0 | 3   | 2 | 1 | 2 | 1 |
| ENSP00000466010 | RPS15    | 152  | 0 | 1   | 0 | 0 | 0 | 0 |
| ENSP00000466089 | KLHL21   | 230  | 0 | 1   | 0 | 0 | 0 | 0 |
| ENSP00000466692 | TRAPPC4  | 257  | 0 | 1   | 0 | 0 | 0 | 0 |
| ENSP00000466767 | ATP6V0A1 | 195  | 0 | 2   | 0 | 0 | 0 | 1 |
| ENSP00000466807 | CNP      | 120  | 0 | 1   | 0 | 0 | 0 | 2 |
| ENSP00000466812 | AP2B1    | 132  | 0 | 1   | 1 | 0 | 2 | 0 |
| ENSP00000466871 | MAPRE2   | 78   | 0 | 1   | 0 | 0 | 0 | 0 |
| ENSP00000466878 | ATP6V0A1 | 794  | 0 | 2   | 0 | 0 | 0 | 1 |

|                 |               |      |   |    |    |   |   |   |
|-----------------|---------------|------|---|----|----|---|---|---|
| ENSP00000467124 | KRT16         | 162  | 0 | 1  | 1  | 0 | 0 | 0 |
| ENSP00000467213 | MAP2K6        | 278  | 0 | 1  | 0  | 0 | 0 | 0 |
| ENSP00000467225 | VPS25         | 99   | 0 | 1  | 0  | 0 | 1 | 1 |
| ENSP00000467231 | DOCK6         | 148  | 0 | 1  | 0  | 0 | 0 | 0 |
| ENSP00000467386 | ATP9B         | 289  | 0 | 1  | 0  | 0 | 1 | 0 |
| ENSP00000467430 | DNM2          | 50   | 0 | 2  | 0  | 0 | 1 | 1 |
| ENSP00000467433 | UBA2          | 262  | 0 | 1  | 0  | 0 | 0 | 0 |
| ENSP00000467437 | CANT1         | 401  | 0 | 1  | 0  | 0 | 0 | 0 |
| ENSP00000467444 | ENO3          | 196  | 0 | 2  | 2  | 0 | 0 | 0 |
| ENSP00000467587 | RPL27         | 136  | 0 | 1  | 0  | 0 | 2 | 1 |
| ENSP00000467686 | TRAPPC4       | 126  | 0 | 1  | 0  | 0 | 0 | 0 |
| ENSP00000467727 | FXVD1         | 92   | 0 | 2  | 0  | 0 | 0 | 0 |
| ENSP00000467830 | ATP5A1        | 111  | 0 | 1  | 1  | 0 | 0 | 0 |
| ENSP00000467900 | GPX4          | 166  | 0 | 1  | 0  | 0 | 0 | 0 |
| ENSP00000467932 | KRT9          | 390  | 0 | 13 | 16 | 0 | 3 | 0 |
| ENSP00000467939 | RPL27         | 80   | 0 | 1  | 0  | 0 | 2 | 1 |
| ENSP00000468165 | TXNL1         | 281  | 0 | 1  | 0  | 0 | 1 | 0 |
| ENSP00000468218 | ATP9B         | 192  | 0 | 2  | 0  | 0 | 0 | 2 |
| ENSP00000468247 | SNRPD2        | 78   | 0 | 1  | 0  | 0 | 1 | 0 |
| ENSP00000468367 | CTD-2132N18.3 | 282  | 0 | 1  | 0  | 0 | 1 | 0 |
| ENSP00000468402 | RPL23A        | 175  | 0 | 1  | 0  | 1 | 2 | 0 |
| ENSP00000468498 | UBE2O         | 807  | 0 | 1  | 2  | 1 | 0 | 0 |
| ENSP00000468604 | DUSP3         | 132  | 0 | 2  | 0  | 0 | 0 | 0 |
| ENSP00000468940 | UBE2M         | 69   | 0 | 2  | 0  | 0 | 0 | 0 |
| ENSP00000469125 | VBP1          | 192  | 0 | 1  | 1  | 0 | 1 | 0 |
| ENSP00000469228 | RPS19         | 76   | 0 | 1  | 0  | 0 | 2 | 0 |
| ENSP00000469263 | TECR          | 131  | 0 | 3  | 2  | 1 | 2 | 0 |
| ENSP00000469558 | BCAP31        | 138  | 0 | 1  | 0  | 0 | 1 | 0 |
| ENSP00000469855 | UBE2M         | 114  | 0 | 3  | 0  | 0 | 0 | 1 |
| ENSP00000469989 | RPL36A        | 106  | 0 | 2  | 0  | 0 | 0 | 0 |
| ENSP00000470176 | AP2S1         | 158  | 0 | 2  | 0  | 0 | 1 | 0 |
| ENSP00000470246 | RAB4B         | 213  | 0 | 2  | 0  | 1 | 1 | 1 |
| ENSP00000470447 | RPS11         | 118  | 0 | 1  | 0  | 0 | 1 | 0 |
| ENSP00000470743 | RPL10         | 214  | 0 | 2  | 1  | 0 | 1 | 0 |
| ENSP00000471222 | AC024257.1    | 150  | 0 | 1  | 0  | 0 | 0 | 0 |
| ENSP00000471261 | NAPA          | 139  | 0 | 1  | 0  | 1 | 0 | 0 |
| ENSP00000471340 | AP2S1         | 144  | 0 | 3  | 0  | 0 | 2 | 0 |
| ENSP00000471438 | IDH3G         | 322  | 0 | 2  | 3  | 0 | 1 | 0 |
| ENSP00000471537 | ATP2B3        | 1159 | 0 | 1  | 1  | 0 | 0 | 0 |
| ENSP00000471584 | RPL18A        | 154  | 0 | 4  | 0  | 0 | 1 | 1 |
| ENSP00000471937 | NSUN4         | 151  | 0 | 1  | 0  | 0 | 0 | 0 |
| ENSP00000472080 | AP2S1         | 92   | 0 | 2  | 0  | 0 | 1 | 1 |
| ENSP00000472168 | HSD17B10      | 261  | 0 | 1  | 0  | 0 | 0 | 0 |
| ENSP00000472182 | KDELRL1       | 220  | 0 | 1  | 0  | 0 | 0 | 0 |
| ENSP00000472543 | MYH14         | 2003 | 0 | 1  | 0  | 0 | 2 | 0 |
| ENSP00000472834 | PGK1          | 281  | 0 | 1  | 0  | 0 | 1 | 0 |
| ENSP00000473155 | RPL18A        | 141  | 0 | 1  | 0  | 0 | 0 | 0 |
| ENSP00000473408 | TCEB1         | 65   | 0 | 1  | 0  | 0 | 0 | 0 |
| ENSP00000473435 | ARPC4         | 77   | 0 | 2  | 0  | 1 | 1 | 1 |
| ENSP00000473548 | PPIF          | 145  | 0 | 1  | 0  | 0 | 0 | 0 |
| ENSP00000474028 | NCAM1         | 907  | 0 | 1  | 0  | 0 | 0 | 0 |
| ENSP00000474184 | RPS9          | 194  | 0 | 1  | 0  | 0 | 1 | 0 |
| ENSP00000474603 | RAB3A         | 125  | 0 | 3  | 6  | 2 | 5 | 3 |
| ENSP00000474669 | ALDH2         | 117  | 0 | 1  | 0  | 0 | 1 | 0 |
| ENSP00000475027 | RPS10-NUDT3   | 286  | 0 | 1  | 0  | 0 | 0 | 0 |
| ENSP00000475496 | SCAMP1        | 338  | 0 | 3  | 2  | 0 | 0 | 0 |
| ENSP00000475555 | PHB2          | 299  | 0 | 1  | 0  | 0 | 0 | 0 |
| ENSP00000475829 | TPI1          | 98   | 0 | 5  | 2  | 0 | 5 | 3 |

|                 |           |      |   |   |     |   |   |   |
|-----------------|-----------|------|---|---|-----|---|---|---|
| ENSP00000476975 | DSTN      | 148  | 0 | 3 | 0   | 0 | 0 | 0 |
| ENSP00000476985 | RPS19     | 76   | 0 | 1 | 0   | 0 | 0 | 0 |
| ENSP00000477075 | TKT       | 576  | 0 | 1 | 1   | 0 | 3 | 1 |
| ENSP00000477164 | CDKL3     | 471  | 0 | 3 | 2   | 0 | 4 | 0 |
| ENSP00000477310 | DYNLL2    | 89   | 0 | 2 | 1   | 0 | 1 | 0 |
| ENSP00000011473 | SYPL1     | 259  | 0 | 0 | 1   | 0 | 0 | 0 |
| ENSP00000023064 | SLC7A9    | 487  | 0 | 0 | 1   | 0 | 0 | 0 |
| ENSP00000046794 | LCP2      | 533  | 0 | 0 | 1   | 0 | 0 | 0 |
| ENSP00000071281 | FHL1      | 323  | 0 | 0 | 1   | 0 | 1 | 0 |
| ENSP00000215473 | PCDH11Y   | 1340 | 0 | 0 | 1   | 0 | 0 | 0 |
| ENSP00000216330 | FKBP3     | 224  | 0 | 0 | 1   | 0 | 0 | 0 |
| ENSP00000216350 | PRMT5     | 576  | 0 | 0 | 2   | 0 | 0 | 0 |
| ENSP00000216455 | PSMA3     | 255  | 0 | 0 | 1   | 0 | 0 | 0 |
| ENSP00000216468 | TMED8     | 325  | 0 | 0 | 1   | 0 | 0 | 0 |
| ENSP00000216840 | RABGGTA   | 567  | 0 | 0 | 1   | 0 | 0 | 0 |
| ENSP00000217131 | CTSZ      | 303  | 0 | 0 | 1   | 0 | 0 | 0 |
| ENSP00000218056 | WDR13     | 485  | 0 | 0 | 1   | 0 | 0 | 0 |
| ENSP00000218343 | JADE3     | 823  | 0 | 0 | 2   | 0 | 1 | 0 |
| ENSP00000219313 | PSMD7     | 324  | 0 | 0 | 1   | 0 | 0 | 0 |
| ENSP00000220616 | TG        | 2768 | 0 | 0 | 1   | 0 | 0 | 0 |
| ENSP00000221476 | CKM       | 381  | 0 | 0 | 1   | 0 | 0 | 0 |
| ENSP00000223029 | AIMP2     | 320  | 0 | 0 | 1   | 0 | 0 | 0 |
| ENSP00000224721 | CDH23     | 3359 | 0 | 0 | 1   | 1 | 0 | 0 |
| ENSP00000225441 | RUNDC3A   | 405  | 0 | 0 | 1   | 0 | 1 | 0 |
| ENSP00000226328 | RUFY3     | 469  | 0 | 0 | 1   | 1 | 1 | 0 |
| ENSP00000229314 | GOLT1B    | 138  | 0 | 0 | 1   | 1 | 0 | 0 |
| ENSP00000230050 | RPS12     | 132  | 0 | 0 | 2   | 1 | 0 | 0 |
| ENSP00000233892 | MOB4      | 193  | 0 | 0 | 1   | 0 | 1 | 0 |
| ENSP00000235453 | DENND1B   | 396  | 0 | 0 | 1   | 0 | 0 | 0 |
| ENSP00000242140 | WIPF3     | 483  | 0 | 0 | 1   | 0 | 0 | 0 |
| ENSP00000242848 | ZC3H13    | 1668 | 0 | 0 | 1   | 0 | 0 | 0 |
| ENSP00000244364 | DST       | 5171 | 0 | 0 | 1   | 0 | 0 | 0 |
| ENSP00000244745 | SOX4      | 474  | 0 | 0 | 1   | 0 | 0 | 0 |
| ENSP00000245544 | NUP85     | 656  | 0 | 0 | 1   | 0 | 0 | 0 |
| ENSP00000246012 | CST8      | 142  | 0 | 0 | 1   | 0 | 0 | 0 |
| ENSP00000247584 | HIVEP3    | 2406 | 0 | 0 | 1   | 0 | 0 | 0 |
| ENSP00000251527 | ESYT2     | 893  | 0 | 0 | 1   | 0 | 0 | 0 |
| ENSP00000252288 | GAMT      | 236  | 0 | 0 | 1   | 0 | 0 | 0 |
| ENSP00000252655 | RSPH3     | 560  | 0 | 0 | 1   | 0 | 0 | 0 |
| ENSP00000252677 | BMP15     | 392  | 0 | 0 | 1   | 0 | 0 | 0 |
| ENSP00000253382 | ACSS2     | 714  | 0 | 0 | 1   | 0 | 0 | 0 |
| ENSP00000254722 | SERPINF1  | 418  | 0 | 0 | 1   | 0 | 0 | 0 |
| ENSP00000254770 | LANCL2    | 450  | 0 | 0 | 2   | 0 | 0 | 1 |
| ENSP00000256001 | ACTR3B    | 418  | 0 | 0 | 1   | 0 | 1 | 0 |
| ENSP00000256196 | RRAS2     | 204  | 0 | 0 | 1   | 0 | 2 | 0 |
| ENSP00000258180 | KIAA0513  | 411  | 0 | 0 | 1   | 0 | 0 | 0 |
| ENSP00000258398 | TTL4      | 1199 | 0 | 0 | 1   | 0 | 0 | 0 |
| ENSP00000259217 | SMPD4     | 837  | 0 | 0 | 1   | 0 | 0 | 0 |
| ENSP00000259667 | HINT2     | 163  | 0 | 0 | 1   | 0 | 0 | 0 |
| ENSP00000260323 | UNC13C    | 2214 | 0 | 0 | 1   | 0 | 0 | 0 |
| ENSP00000260645 | ABCG5     | 651  | 0 | 0 | 1   | 0 | 0 | 0 |
| ENSP00000261479 | PSMA6     | 246  | 0 | 0 | 1   | 0 | 2 | 0 |
| ENSP00000261700 | C14orf166 | 244  | 0 | 0 | 1   | 0 | 1 | 0 |
| ENSP00000261712 | PSMD11    | 422  | 0 | 0 | 1   | 1 | 1 | 0 |
| ENSP00000261726 | CUX2      | 1486 | 0 | 0 | 1   | 0 | 0 | 0 |
| ENSP00000261745 | NAA25     | 972  | 0 | 0 | 0.5 | 0 | 0 | 0 |
| ENSP00000261892 | SLC24A1   | 1099 | 0 | 0 | 1   | 0 | 0 | 0 |
| ENSP00000261973 | RBM25     | 843  | 0 | 0 | 1   | 0 | 0 | 0 |

|                 |          |      |   |   |   |   |   |   |
|-----------------|----------|------|---|---|---|---|---|---|
| ENSP00000262210 | CSPP1    | 1221 | 0 | 0 | 1 | 0 | 0 | 0 |
| ENSP00000262622 | CHST8    | 424  | 0 | 0 | 1 | 0 | 0 | 0 |
| ENSP00000262640 | VAMP7    | 260  | 0 | 0 | 1 | 0 | 0 | 0 |
| ENSP00000262873 | MYH7B    | 1983 | 0 | 0 | 1 | 0 | 0 | 0 |
| ENSP00000263035 | DHTKD1   | 919  | 0 | 0 | 1 | 0 | 2 | 0 |
| ENSP00000263054 | SORCS1   | 1168 | 0 | 0 | 1 | 0 | 0 | 0 |
| ENSP00000263351 | ZNF541   | 679  | 0 | 0 | 1 | 0 | 0 | 0 |
| ENSP00000264405 | SEC31A   | 969  | 0 | 0 | 1 | 0 | 0 | 0 |
| ENSP00000264424 | GUCY1B3  | 619  | 0 | 0 | 2 | 0 | 0 | 0 |
| ENSP00000265094 | FBXW11   | 542  | 0 | 0 | 1 | 0 | 0 | 0 |
| ENSP00000265334 | CDKL3    | 592  | 0 | 0 | 1 | 0 | 1 | 0 |
| ENSP00000266037 | DOCK3    | 2030 | 0 | 0 | 1 | 0 | 0 | 1 |
| ENSP00000266984 | CCDC65   | 497  | 0 | 0 | 1 | 0 | 0 | 0 |
| ENSP00000267176 | SBNO1    | 1392 | 0 | 0 | 1 | 0 | 1 | 0 |
| ENSP00000267996 | TPM1     | 284  | 0 | 0 | 1 | 0 | 0 | 0 |
| ENSP00000268261 | PMM2     | 246  | 0 | 0 | 1 | 0 | 2 | 0 |
| ENSP00000268699 | GAS8     | 478  | 0 | 0 | 1 | 0 | 0 | 0 |
| ENSP00000268717 | COPS3    | 423  | 0 | 0 | 1 | 0 | 1 | 0 |
| ENSP00000269187 | SLC39A6  | 755  | 0 | 0 | 1 | 0 | 0 | 0 |
| ENSP00000269346 | TTYH2    | 534  | 0 | 0 | 1 | 0 | 1 | 0 |
| ENSP00000272198 | PPFIA4   | 701  | 0 | 0 | 1 | 1 | 0 | 0 |
| ENSP00000273062 | CTDSP1   | 261  | 0 | 0 | 1 | 0 | 0 | 0 |
| ENSP00000273480 | RNF7     | 113  | 0 | 0 | 1 | 0 | 0 | 0 |
| ENSP00000275884 | DENND2A  | 1009 | 0 | 0 | 1 | 0 | 0 | 0 |
| ENSP00000280684 | KCNA6    | 529  | 0 | 0 | 1 | 0 | 0 | 0 |
| ENSP00000280892 | EIF4E    | 237  | 0 | 0 | 1 | 0 | 0 | 1 |
| ENSP00000281282 | CGNL1    | 1302 | 0 | 0 | 1 | 0 | 1 | 1 |
| ENSP00000282891 | RAD17    | 584  | 0 | 0 | 1 | 0 | 0 | 0 |
| ENSP00000283131 | SMARCA5  | 1052 | 0 | 0 | 1 | 0 | 0 | 0 |
| ENSP00000283943 | TRIP12   | 1992 | 0 | 0 | 1 | 0 | 0 | 1 |
| ENSP00000284031 | DDAH1    | 285  | 0 | 0 | 1 | 1 | 2 | 0 |
| ENSP00000284136 | SEMA3D   | 777  | 0 | 0 | 1 | 0 | 0 | 0 |
| ENSP00000285093 | ACAA2    | 397  | 0 | 0 | 1 | 0 | 0 | 0 |
| ENSP00000286485 | PSD3     | 513  | 0 | 0 | 1 | 0 | 0 | 0 |
| ENSP00000286744 | ADAMTSL3 | 1691 | 0 | 0 | 1 | 0 | 0 | 0 |
| ENSP00000287546 | VPS8     | 1428 | 0 | 0 | 1 | 0 | 0 | 0 |
| ENSP00000288197 | CACNA2D3 | 1091 | 0 | 0 | 1 | 0 | 2 | 3 |
| ENSP00000288266 | APPL1    | 709  | 0 | 0 | 1 | 0 | 0 | 0 |
| ENSP00000288666 | RPS4Y2   | 263  | 0 | 0 | 1 | 0 | 0 | 0 |
| ENSP00000289577 | TMED4    | 178  | 0 | 0 | 1 | 1 | 0 | 0 |
| ENSP00000291572 | AGPAT3   | 376  | 0 | 0 | 1 | 0 | 0 | 0 |
| ENSP00000292644 | PSMC2    | 433  | 0 | 0 | 1 | 0 | 1 | 0 |
| ENSP00000293774 | KRT4     | 594  | 0 | 0 | 1 | 0 | 0 | 0 |
| ENSP00000295006 | CAPN2    | 700  | 0 | 0 | 1 | 0 | 0 | 0 |
| ENSP00000295878 | KIAA1407 | 936  | 0 | 0 | 1 | 0 | 0 | 0 |
| ENSP00000295962 | ABHD6    | 337  | 0 | 0 | 1 | 1 | 0 | 0 |
| ENSP00000296577 | ABCE1    | 599  | 0 | 0 | 2 | 0 | 1 | 0 |
| ENSP00000297262 | RSPH3    | 464  | 0 | 0 | 1 | 0 | 0 | 0 |
| ENSP00000297689 | NFIL3    | 462  | 0 | 0 | 1 | 0 | 0 | 0 |
| ENSP00000298687 | NDRG2    | 371  | 0 | 0 | 1 | 0 | 0 | 0 |
| ENSP00000299001 | PIWIL4   | 852  | 0 | 0 | 1 | 0 | 0 | 0 |
| ENSP00000299275 | PLEKHA5  | 1116 | 0 | 0 | 1 | 0 | 0 | 0 |
| ENSP00000300061 | SCNN1G   | 649  | 0 | 0 | 1 | 0 | 0 | 0 |
| ENSP00000300773 | OR51B5   | 312  | 0 | 0 | 1 | 0 | 0 | 0 |
| ENSP00000301336 | RILP     | 401  | 0 | 0 | 1 | 0 | 0 | 0 |
| ENSP00000301776 | ASRGL1   | 308  | 0 | 0 | 1 | 0 | 0 | 0 |
| ENSP00000303058 | CEP120   | 986  | 0 | 0 | 2 | 1 | 1 | 1 |
| ENSP00000303147 | MAT2A    | 395  | 0 | 0 | 1 | 0 | 1 | 0 |

|                 |                |       |   |   |     |     |   |   |
|-----------------|----------------|-------|---|---|-----|-----|---|---|
| ENSP00000303366 | LMAN2          | 356   | 0 | 0 | 1   | 0   | 0 | 0 |
| ENSP00000304229 | HINT1          | 126   | 0 | 0 | 1   | 0   | 1 | 2 |
| ENSP00000304401 | SLFNL1         | 407   | 0 | 0 | 1   | 0   | 0 | 0 |
| ENSP00000304701 | SH2B2          | 631   | 0 | 0 | 1   | 0   | 0 | 0 |
| ENSP00000305288 | NLGN2          | 835   | 0 | 0 | 1   | 0   | 0 | 0 |
| ENSP00000305988 | ALCAM          | 583   | 0 | 0 | 2   | 0   | 3 | 1 |
| ENSP00000306157 | IL7R           | 459   | 0 | 0 | 1   | 0   | 0 | 0 |
| ENSP00000306607 | OR1L8          | 309   | 0 | 0 | 1   | 0   | 0 | 0 |
| ENSP00000307387 | PDCD6IP        | 868   | 0 | 0 | 1   | 0   | 0 | 3 |
| ENSP00000307479 | ARNT2          | 717   | 0 | 0 | 1   | 0   | 0 | 0 |
| ENSP00000308540 | RP11-1407O15.2 | 478   | 0 | 0 | 1   | 0   | 2 | 1 |
| ENSP00000308780 | WHSC1          | 647   | 0 | 0 | 1   | 0   | 0 | 0 |
| ENSP00000310440 | CHMP2A         | 222   | 0 | 0 | 1   | 0   | 0 | 0 |
| ENSP00000313516 | ZNF786         | 696   | 0 | 0 | 1   | 0   | 0 | 0 |
| ENSP00000317128 | PLXND1         | 1925  | 0 | 0 | 2   | 0   | 0 | 0 |
| ENSP00000317441 | AMPH           | 653   | 0 | 0 | 2   | 0   | 0 | 0 |
| ENSP00000317985 | ROCK2          | 1388  | 0 | 0 | 2   | 0   | 0 | 2 |
| ENSP00000318297 | RUVBL1         | 456   | 0 | 0 | 1   | 0   | 0 | 0 |
| ENSP00000318318 | MPI            | 423   | 0 | 0 | 1   | 0   | 0 | 0 |
| ENSP00000318716 | FAM9B          | 186   | 0 | 0 | 1   | 0   | 0 | 0 |
| ENSP00000320592 | CEP112         | 211   | 0 | 0 | 1   | 0   | 0 | 0 |
| ENSP00000320949 | CNOT1          | 2376  | 0 | 0 | 2   | 1   | 0 | 0 |
| ENSP00000321583 | DIS3L          | 971   | 0 | 0 | 1   | 0   | 0 | 0 |
| ENSP00000321584 | IMPDH2         | 514   | 0 | 0 | 1   | 0   | 0 | 0 |
| ENSP00000322427 | ZNF611         | 705   | 0 | 0 | 1   | 0   | 0 | 0 |
| ENSP00000322791 | KIF1A          | 1690  | 0 | 0 | 1   | 1   | 0 | 1 |
| ENSP00000324573 | FLII           | 1269  | 0 | 0 | 1   | 0   | 0 | 0 |
| ENSP00000325508 | C11orf71       | 147   | 0 | 0 | 1   | 0   | 0 | 0 |
| ENSP00000325518 | TSTD1          | 109   | 0 | 0 | 2   | 0   | 0 | 0 |
| ENSP00000325593 | NFKBIZ         | 596   | 0 | 0 | 1   | 0   | 0 | 0 |
| ENSP00000325690 | CARM1          | 608   | 0 | 0 | 1   | 0   | 1 | 0 |
| ENSP00000326968 | FBXO9          | 437   | 0 | 0 | 1   | 0   | 0 | 0 |
| ENSP00000327431 | HBG1           | 147   | 0 | 0 | 1   | 0   | 1 | 0 |
| ENSP00000327821 | XPOT           | 962   | 0 | 0 | 1   | 0   | 1 | 1 |
| ENSP00000328213 | LCK            | 539   | 0 | 0 | 1   | 0   | 0 | 0 |
| ENSP00000328307 | FAM47B         | 645   | 0 | 0 | 1   | 0   | 0 | 0 |
| ENSP00000328358 | KRT79          | 535   | 0 | 0 | 0.5 | 0.5 | 0 | 0 |
| ENSP00000329664 | ATP2C1         | 888   | 0 | 0 | 1   | 0   | 0 | 0 |
| ENSP00000330349 | DDX41          | 640   | 0 | 0 | 1   | 0   | 0 | 0 |
| ENSP00000330381 | WDR5B          | 330   | 0 | 0 | 1   | 0   | 0 | 0 |
| ENSP00000331211 | RBM43          | 357   | 0 | 0 | 1   | 0   | 0 | 0 |
| ENSP00000332111 | EFCAB13        | 973   | 0 | 0 | 1   | 0   | 0 | 0 |
| ENSP00000335083 | PPP2R2C        | 447   | 0 | 0 | 1   | 0   | 0 | 0 |
| ENSP00000335084 | PPP1CC         | 323   | 0 | 0 | 1   | 0   | 0 | 0 |
| ENSP00000335321 | SF3B1          | 1304  | 0 | 0 | 1   | 0   | 0 | 0 |
| ENSP00000337190 | ACSS2          | 651   | 0 | 0 | 1   | 0   | 0 | 0 |
| ENSP00000339004 | FOXG1          | 489   | 0 | 0 | 1   | 0   | 0 | 0 |
| ENSP00000339659 | TRIM2          | 771   | 0 | 0 | 1   | 1   | 1 | 0 |
| ENSP00000340089 | TLR5           | 858   | 0 | 0 | 1   | 0   | 1 | 0 |
| ENSP00000340465 | SLC20A2        | 652   | 0 | 0 | 1   | 0   | 0 | 0 |
| ENSP00000340900 | MIA3           | 1907  | 0 | 0 | 1   | 0   | 0 | 0 |
| ENSP00000341653 | TPM3           | 232   | 0 | 0 | 1   | 0   | 0 | 0 |
| ENSP00000341779 | PPP1CC         | 337   | 0 | 0 | 1   | 0   | 0 | 0 |
| ENSP00000341837 | SLC24A1        | 1081  | 0 | 0 | 1   | 0   | 0 | 1 |
| ENSP00000342121 | RNF6           | 685   | 0 | 0 | 1   | 0   | 0 | 0 |
| ENSP00000342681 | CD5            | 495   | 0 | 0 | 1   | 0   | 0 | 0 |
| ENSP00000343633 | FOXN2          | 431   | 0 | 0 | 1   | 0   | 0 | 0 |
| ENSP00000343764 | TTN            | 33423 | 0 | 0 | 1   | 0   | 0 | 0 |



|                 |              |      |   |   |   |   |   |   |
|-----------------|--------------|------|---|---|---|---|---|---|
| ENSP00000345358 | MCRS1        | 462  | 0 | 0 | 1 | 0 | 0 | 0 |
| ENSP00000345463 | APP          | 695  | 0 | 0 | 1 | 0 | 2 | 0 |
| ENSP00000345873 | SLC26A3      | 764  | 0 | 0 | 1 | 0 | 0 | 0 |
| ENSP00000345964 | SORCS1       | 1198 | 0 | 0 | 1 | 0 | 0 | 0 |
| ENSP00000346169 | SEPT6        | 429  | 0 | 0 | 1 | 0 | 0 | 0 |
| ENSP00000346435 | PDE10A       | 779  | 0 | 0 | 2 | 0 | 0 | 0 |
| ENSP00000346534 | SCN8A        | 1980 | 0 | 0 | 1 | 0 | 0 | 0 |
| ENSP00000346916 | TRIM6-TRIM34 | 842  | 0 | 0 | 1 | 0 | 0 | 0 |
| ENSP00000347032 | PIP4K2C      | 421  | 0 | 0 | 1 | 1 | 1 | 0 |
| ENSP00000348248 | GABBR1       | 844  | 0 | 0 | 1 | 0 | 0 | 0 |
| ENSP00000348611 | PHLPP2       | 1323 | 0 | 0 | 2 | 0 | 0 | 0 |
| ENSP00000349205 | PIK3R4       | 1358 | 0 | 0 | 1 | 0 | 0 | 0 |
| ENSP00000349351 | BICD2        | 855  | 0 | 0 | 1 | 0 | 0 | 0 |
| ENSP00000349768 | DCHS2        | 2916 | 0 | 0 | 1 | 0 | 0 | 0 |
| ENSP00000350191 | ALDH5A1      | 535  | 0 | 0 | 1 | 0 | 0 | 0 |
| ENSP00000350512 | COPS5        | 334  | 0 | 0 | 1 | 0 | 1 | 0 |
| ENSP00000350928 | GAD1         | 594  | 0 | 0 | 1 | 1 | 1 | 0 |
| ENSP00000351140 | MAP3K19      | 1215 | 0 | 0 | 1 | 1 | 0 | 0 |
| ENSP00000351417 | OMA1         | 486  | 0 | 0 | 1 | 0 | 0 | 0 |
| ENSP00000352121 | PIK3CG       | 1102 | 0 | 0 | 1 | 0 | 0 | 0 |
| ENSP00000352123 | IKZF1        | 477  | 0 | 0 | 1 | 0 | 0 | 0 |
| ENSP00000352438 | PCBP2        | 366  | 0 | 0 | 1 | 0 | 0 | 0 |
| ENSP00000352593 | DMBT1        | 1133 | 0 | 0 | 1 | 0 | 0 | 0 |
| ENSP00000353068 | CCSER2       | 567  | 0 | 0 | 1 | 0 | 0 | 0 |
| ENSP00000353633 | CPNE8        | 552  | 0 | 0 | 1 | 0 | 0 | 0 |
| ENSP00000354074 | RPS24        | 130  | 0 | 0 | 1 | 0 | 1 | 1 |
| ENSP00000354508 | DST          | 7461 | 0 | 0 | 1 | 0 | 0 | 0 |
| ENSP00000354558 | MTOR         | 2549 | 0 | 0 | 1 | 0 | 0 | 0 |
| ENSP00000354919 | VEPH1        | 833  | 0 | 0 | 1 | 0 | 0 | 0 |
| ENSP00000354991 | ALPK2        | 2170 | 0 | 0 | 1 | 0 | 0 | 0 |
| ENSP00000355045 | FAM179B      | 1720 | 0 | 0 | 1 | 0 | 0 | 0 |
| ENSP00000355234 | MAG          | 582  | 0 | 0 | 1 | 0 | 1 | 1 |
| ENSP00000355510 | WDR64        | 1081 | 0 | 0 | 1 | 0 | 1 | 1 |
| ENSP00000355846 | TLR5         | 858  | 0 | 0 | 1 | 0 | 1 | 0 |
| ENSP00000355847 | PDE10A       | 779  | 0 | 0 | 2 | 0 | 0 | 0 |
| ENSP00000355963 | LPGAT1       | 370  | 0 | 0 | 1 | 0 | 1 | 0 |
| ENSP00000355964 | LPGAT1       | 370  | 0 | 0 | 1 | 0 | 1 | 0 |
| ENSP00000356255 | RNPEP        | 611  | 0 | 0 | 1 | 0 | 2 | 1 |
| ENSP00000356348 | PCMT1        | 285  | 0 | 0 | 1 | 1 | 0 | 1 |
| ENSP00000356366 | DENND1B      | 426  | 0 | 0 | 1 | 0 | 0 | 0 |
| ENSP00000356705 | DNM3         | 859  | 0 | 0 | 1 | 0 | 1 | 0 |
| ENSP00000357621 | HDAC2        | 458  | 0 | 0 | 1 | 0 | 0 | 0 |
| ENSP00000357838 | OAT          | 439  | 0 | 0 | 2 | 0 | 0 | 0 |
| ENSP00000358232 | PNLIPRP3     | 467  | 0 | 0 | 1 | 0 | 0 | 0 |
| ENSP00000358694 | XPNPEP1      | 623  | 0 | 0 | 1 | 0 | 1 | 0 |
| ENSP00000359230 | HAUS7        | 368  | 0 | 0 | 1 | 0 | 0 | 0 |
| ENSP00000359977 | FBXO9        | 403  | 0 | 0 | 1 | 0 | 0 | 0 |
| ENSP00000360934 | SARDH        | 368  | 0 | 0 | 1 | 1 | 0 | 1 |
| ENSP00000361214 | NRG3         | 696  | 0 | 0 | 1 | 0 | 0 | 0 |
| ENSP00000361254 | FAM213A      | 229  | 0 | 0 | 1 | 0 | 2 | 0 |
| ENSP00000361259 | FAM213A      | 218  | 0 | 0 | 1 | 0 | 2 | 0 |
| ENSP00000361645 | SH3GLB2      | 395  | 0 | 0 | 1 | 0 | 0 | 0 |
| ENSP00000361665 | HIVEP3       | 2405 | 0 | 0 | 1 | 0 | 0 | 0 |
| ENSP00000362928 | SRPK1        | 547  | 0 | 0 | 1 | 0 | 1 | 0 |
| ENSP00000363155 | PACSN1       | 402  | 0 | 0 | 1 | 1 | 1 | 0 |
| ENSP00000363509 | KIF4A        | 1127 | 0 | 0 | 1 | 0 | 0 | 0 |
| ENSP00000364119 | EIF2S2       | 333  | 0 | 0 | 1 | 0 | 0 | 0 |
| ENSP00000364286 | CAPZB        | 260  | 0 | 0 | 3 | 0 | 1 | 1 |

|                 |          |      |   |   |   |   |   |   |
|-----------------|----------|------|---|---|---|---|---|---|
| ENSP00000364934 | CLIC1    | 241  | 0 | 0 | 1 | 0 | 0 | 0 |
| ENSP00000365438 | DGAT2    | 345  | 0 | 0 | 1 | 0 | 0 | 0 |
| ENSP00000365919 | WDR13    | 485  | 0 | 0 | 1 | 0 | 0 | 0 |
| ENSP00000366036 | TBC1D8   | 1140 | 0 | 0 | 1 | 0 | 0 | 0 |
| ENSP00000366502 | CLSTN1   | 962  | 0 | 0 | 1 | 1 | 0 | 0 |
| ENSP00000366513 | CLSTN1   | 981  | 0 | 0 | 1 | 1 | 0 | 0 |
| ENSP00000367100 | TG       | 2711 | 0 | 0 | 1 | 0 | 0 | 0 |
| ENSP00000367202 | RECK     | 971  | 0 | 0 | 1 | 0 | 0 | 0 |
| ENSP00000368511 | CXorf58  | 332  | 0 | 0 | 1 | 0 | 0 | 0 |
| ENSP00000368574 | ACSL6    | 712  | 0 | 0 | 1 | 0 | 0 | 0 |
| ENSP00000368927 | EIF1AX   | 144  | 0 | 0 | 1 | 0 | 0 | 0 |
| ENSP00000369042 | IPO7     | 1038 | 0 | 0 | 1 | 1 | 4 | 1 |
| ENSP00000369129 | DSP      | 2871 | 0 | 0 | 1 | 0 | 0 | 0 |
| ENSP00000369223 | DCLK1    | 433  | 0 | 0 | 1 | 0 | 0 | 0 |
| ENSP00000369317 | KRT6A    | 564  | 0 | 0 | 1 | 0 | 0 | 0 |
| ENSP00000369600 | FRY      | 3013 | 0 | 0 | 1 | 0 | 0 | 0 |
| ENSP00000369677 | EMILIN1  | 1016 | 0 | 0 | 1 | 0 | 0 | 0 |
| ENSP00000369768 | HSPH1    | 814  | 0 | 0 | 1 | 1 | 0 | 0 |
| ENSP00000370394 | RUFY3    | 620  | 0 | 0 | 1 | 1 | 1 | 0 |
| ENSP00000371221 | MTMR6    | 621  | 0 | 0 | 1 | 0 | 0 | 0 |
| ENSP00000371293 | MTUS1    | 1216 | 0 | 0 | 1 | 0 | 0 | 0 |
| ENSP00000371314 | SPATA6L  | 291  | 0 | 0 | 2 | 0 | 0 | 0 |
| ENSP00000371377 | OR1A2    | 309  | 0 | 0 | 1 | 0 | 0 | 0 |
| ENSP00000371462 | MAP1A    | 3041 | 0 | 0 | 1 | 0 | 0 | 0 |
| ENSP00000371668 | FAM179B  | 995  | 0 | 0 | 1 | 0 | 0 | 0 |
| ENSP00000373191 | LNP1     | 178  | 0 | 0 | 1 | 0 | 0 | 1 |
| ENSP00000373342 | CPNE9    | 503  | 0 | 0 | 1 | 0 | 0 | 0 |
| ENSP00000373378 | SDK2     | 2153 | 0 | 0 | 1 | 0 | 0 | 0 |
| ENSP00000373697 | TRIP12   | 1722 | 0 | 0 | 1 | 0 | 0 | 1 |
| ENSP00000374260 | CCDC149  | 529  | 0 | 0 | 1 | 0 | 2 | 0 |
| ENSP00000374444 | LYST     | 3801 | 0 | 0 | 1 | 1 | 1 | 0 |
| ENSP00000375717 | PTOV1    | 416  | 0 | 0 | 1 | 0 | 0 | 0 |
| ENSP00000375808 | ERCC2    | 682  | 0 | 0 | 1 | 0 | 1 | 0 |
| ENSP00000376048 | MAG      | 626  | 0 | 0 | 1 | 0 | 1 | 1 |
| ENSP00000376914 | ATP2C1   | 973  | 0 | 0 | 1 | 0 | 0 | 0 |
| ENSP00000377004 | SPOP     | 374  | 0 | 0 | 1 | 1 | 0 | 0 |
| ENSP00000377928 | ACACA    | 2346 | 0 | 0 | 1 | 0 | 0 | 0 |
| ENSP00000378422 | VKORC1   | 160  | 0 | 0 | 1 | 0 | 0 | 0 |
| ENSP00000378658 | AIMP2    | 251  | 0 | 0 | 1 | 0 | 0 | 0 |
| ENSP00000379374 | FKBP3    | 224  | 0 | 0 | 1 | 0 | 0 | 0 |
| ENSP00000380170 | ZSCAN29  | 463  | 0 | 0 | 1 | 0 | 0 | 0 |
| ENSP00000381298 | LONRF1   | 773  | 0 | 0 | 1 | 0 | 0 | 0 |
| ENSP00000381331 | HDAC2    | 582  | 0 | 0 | 1 | 0 | 0 | 0 |
| ENSP00000382382 | USP47    | 1375 | 0 | 0 | 1 | 0 | 0 | 0 |
| ENSP00000383862 | CAPZB    | 272  | 0 | 0 | 3 | 0 | 1 | 1 |
| ENSP00000384328 | RALB     | 227  | 0 | 0 | 1 | 0 | 1 | 1 |
| ENSP00000384408 | PARG     | 491  | 0 | 0 | 1 | 0 | 0 | 0 |
| ENSP00000385509 | ROCK2    | 1145 | 0 | 0 | 1 | 0 | 0 | 1 |
| ENSP00000385873 | EFTUD2   | 937  | 0 | 0 | 1 | 0 | 1 | 0 |
| ENSP00000386353 | MAT2A    | 299  | 0 | 0 | 1 | 0 | 1 | 0 |
| ENSP00000386790 | WIPF3    | 483  | 0 | 0 | 1 | 0 | 0 | 0 |
| ENSP00000387593 | TANC2    | 1990 | 0 | 0 | 1 | 0 | 0 | 0 |
| ENSP00000387875 | KIF4B    | 1234 | 0 | 0 | 1 | 0 | 0 | 0 |
| ENSP00000387892 | HLA-DQA1 | 255  | 0 | 0 | 1 | 0 | 0 | 0 |
| ENSP00000388293 | TSTD1    | 115  | 0 | 0 | 2 | 0 | 0 | 0 |
| ENSP00000388486 | FOXN2    | 246  | 0 | 0 | 1 | 0 | 0 | 0 |
| ENSP00000388703 | SLC4A7   | 1051 | 0 | 0 | 1 | 0 | 0 | 0 |
| ENSP00000389943 | DPP3     | 737  | 0 | 0 | 1 | 0 | 0 | 0 |

|                 |         |      |   |   |   |   |   |   |
|-----------------|---------|------|---|---|---|---|---|---|
| ENSP00000389975 | SACM1L  | 287  | 0 | 0 | 1 | 0 | 0 | 0 |
| ENSP00000390734 | AMPH    | 653  | 0 | 0 | 1 | 0 | 0 | 0 |
| ENSP00000391167 | DENND4A | 1906 | 0 | 0 | 2 | 0 | 0 | 0 |
| ENSP00000391416 | SEPT3   | 178  | 0 | 0 | 2 | 0 | 0 | 0 |
| ENSP00000391501 | GNAQ    | 170  | 0 | 0 | 2 | 0 | 0 | 0 |
| ENSP00000392781 | CAPZB   | 206  | 0 | 0 | 1 | 0 | 0 | 1 |
| ENSP00000392978 | OMA1    | 183  | 0 | 0 | 1 | 0 | 0 | 0 |
| ENSP00000393228 | PSD3    | 376  | 0 | 0 | 1 | 0 | 0 | 0 |
| ENSP00000393525 | IMPDH2  | 470  | 0 | 0 | 1 | 0 | 0 | 0 |
| ENSP00000394018 | VPS8    | 74   | 0 | 0 | 1 | 0 | 0 | 0 |
| ENSP00000394313 | SMPD4   | 615  | 0 | 0 | 1 | 0 | 0 | 0 |
| ENSP00000397078 | SMPD4   | 313  | 0 | 0 | 1 | 0 | 0 | 0 |
| ENSP00000398010 | FRY     | 150  | 0 | 0 | 1 | 0 | 0 | 0 |
| ENSP00000398081 | RC3H2   | 188  | 0 | 0 | 1 | 0 | 0 | 0 |
| ENSP00000398803 | TSTA3   | 321  | 0 | 0 | 1 | 0 | 0 | 0 |
| ENSP00000400057 | ASRGL1  | 308  | 0 | 0 | 1 | 0 | 0 | 0 |
| ENSP00000400285 | KCNAB2  | 254  | 0 | 0 | 1 | 0 | 0 | 0 |
| ENSP00000401070 | ARPC2   | 89   | 0 | 0 | 1 | 1 | 1 | 0 |
| ENSP00000401507 | IKZF1   | 226  | 0 | 0 | 1 | 0 | 0 | 0 |
| ENSP00000402373 | ACTA2   | 377  | 0 | 0 | 1 | 0 | 0 | 0 |
| ENSP00000402618 | PSMD2   | 749  | 0 | 0 | 1 | 1 | 0 | 1 |
| ENSP00000403084 | SARDH   | 918  | 0 | 0 | 1 | 1 | 0 | 1 |
| ENSP00000404304 | ARMCX4  | 2290 | 0 | 0 | 1 | 0 | 0 | 0 |
| ENSP00000404469 | STK25   | 247  | 0 | 0 | 1 | 0 | 0 | 0 |
| ENSP00000405267 | AHCYL2  | 509  | 0 | 0 | 1 | 0 | 1 | 0 |
| ENSP00000405561 | CAMK2G  | 335  | 0 | 0 | 1 | 0 | 0 | 0 |
| ENSP00000406569 | GLCC1   | 191  | 0 | 0 | 1 | 0 | 0 | 0 |
| ENSP00000407791 | CLIC1   | 241  | 0 | 0 | 1 | 0 | 0 | 0 |
| ENSP00000407944 | SEC31A  | 1233 | 0 | 0 | 1 | 0 | 0 | 0 |
| ENSP00000408711 | ARPC1A  | 279  | 0 | 0 | 1 | 0 | 0 | 0 |
| ENSP00000408789 | LZTR1   | 54   | 0 | 0 | 1 | 0 | 0 | 0 |
| ENSP00000409418 | SLC4A7  | 463  | 0 | 0 | 1 | 0 | 0 | 0 |
| ENSP00000409456 | HNRNPK  | 379  | 0 | 0 | 1 | 0 | 0 | 0 |
| ENSP00000410862 | RUNDC3A | 446  | 0 | 0 | 1 | 0 | 1 | 0 |
| ENSP00000411189 | DDAH1   | 192  | 0 | 0 | 1 | 1 | 2 | 0 |
| ENSP00000412035 | PIP4K2C | 373  | 0 | 0 | 1 | 0 | 0 | 0 |
| ENSP00000412044 | GABBR1  | 899  | 0 | 0 | 2 | 0 | 0 | 0 |
| ENSP00000412606 | FAM9B   | 186  | 0 | 0 | 1 | 0 | 0 | 0 |
| ENSP00000412996 | CCT7    | 98   | 0 | 0 | 1 | 1 | 0 | 0 |
| ENSP00000413133 | APC     | 2843 | 0 | 0 | 1 | 0 | 0 | 0 |
| ENSP00000413311 | ABHD12  | 187  | 0 | 0 | 2 | 0 | 0 | 0 |
| ENSP00000414624 | PRPSAP1 | 385  | 0 | 0 | 1 | 0 | 0 | 0 |
| ENSP00000414906 | DCTN4   | 467  | 0 | 0 | 1 | 0 | 0 | 1 |
| ENSP00000415197 | TLL4    | 179  | 0 | 0 | 1 | 0 | 0 | 0 |
| ENSP00000415549 | RPS24   | 131  | 0 | 0 | 1 | 0 | 1 | 1 |
| ENSP00000415812 | TRIM2   | 744  | 0 | 0 | 1 | 1 | 0 | 0 |
| ENSP00000416591 | POMZP3  | 154  | 0 | 0 | 1 | 0 | 0 | 0 |
| ENSP00000417254 | RUVBL1  | 267  | 0 | 0 | 1 | 0 | 0 | 0 |
| ENSP00000417689 | MGLL    | 89   | 0 | 0 | 1 | 0 | 0 | 0 |
| ENSP00000418309 | C3orf17 | 238  | 0 | 0 | 1 | 0 | 0 | 0 |
| ENSP00000418458 | SPATA6L | 392  | 0 | 0 | 2 | 0 | 0 | 0 |
| ENSP00000418461 | PCMT1   | 67   | 0 | 0 | 1 | 1 | 0 | 0 |
| ENSP00000418842 | NDUFA6  | 154  | 0 | 0 | 1 | 0 | 0 | 0 |
| ENSP00000418889 | CADPS   | 345  | 0 | 0 | 1 | 2 | 1 | 0 |
| ENSP00000419236 | ALCAM   | 570  | 0 | 0 | 3 | 0 | 3 | 1 |
| ENSP00000419260 | PIK3CG  | 1102 | 0 | 0 | 1 | 0 | 0 | 0 |
| ENSP00000419294 | ATP6V1A | 221  | 0 | 0 | 2 | 0 | 2 | 2 |
| ENSP00000419800 | NFKBIZ  | 601  | 0 | 0 | 1 | 0 | 0 | 0 |

|                 |               |      |   |   |     |   |     |   |
|-----------------|---------------|------|---|---|-----|---|-----|---|
| ENSP00000420000 | CAMKV         | 123  | 0 | 0 | 1   | 0 | 0   | 0 |
| ENSP00000420139 | CAMKV         | 94   | 0 | 0 | 1   | 1 | 1   | 0 |
| ENSP00000420315 | ABHD6         | 337  | 0 | 0 | 1   | 1 | 0   | 0 |
| ENSP00000420527 | ABCA2         | 2024 | 0 | 0 | 1   | 0 | 3   | 2 |
| ENSP00000420724 | CAMKV         | 427  | 0 | 0 | 0.5 | 0 | 0   | 0 |
| ENSP00000420842 | GUCY1B3       | 586  | 0 | 0 | 2   | 0 | 0   | 0 |
| ENSP00000421460 | DDX41         | 173  | 0 | 0 | 1   | 0 | 0   | 0 |
| ENSP00000421566 | XPNPEP1       | 666  | 0 | 0 | 1   | 0 | 1   | 0 |
| ENSP00000422191 | RPL9          | 166  | 0 | 0 | 0.5 | 0 | 0   | 0 |
| ENSP00000422316 | GNB2L1        | 274  | 0 | 0 | 1   | 0 | 0   | 0 |
| ENSP00000422482 | HSPA4L        | 839  | 0 | 0 | 1   | 0 | 0   | 0 |
| ENSP00000422810 | TMEM33        | 222  | 0 | 0 | 1   | 0 | 1   | 0 |
| ENSP00000422947 | TRIM34        | 488  | 0 | 0 | 1   | 0 | 0   | 0 |
| ENSP00000423440 | ARMCX4        | 348  | 0 | 0 | 1   | 0 | 0   | 0 |
| ENSP00000425715 | CCDC149       | 529  | 0 | 0 | 1   | 0 | 2   | 0 |
| ENSP00000426720 | DPYSL3        | 92   | 0 | 0 | 1   | 0 | 1   | 0 |
| ENSP00000427194 | MAP1B         | 103  | 0 | 0 | 1   | 0 | 0   | 1 |
| ENSP00000428175 | TACC1         | 138  | 0 | 0 | 1   | 0 | 0   | 0 |
| ENSP00000429483 | RPL30         | 114  | 0 | 0 | 1   | 0 | 0   | 0 |
| ENSP00000429661 | HNRNPH1       | 115  | 0 | 0 | 1   | 0 | 0   | 0 |
| ENSP00000429754 | SLC20A2       | 652  | 0 | 0 | 1   | 0 | 0   | 0 |
| ENSP00000430167 | MTUS1         | 1216 | 0 | 0 | 1   | 0 | 0   | 0 |
| ENSP00000430391 | LCP2          | 140  | 0 | 0 | 1   | 0 | 0   | 0 |
| ENSP00000430443 | MPP2          | 126  | 0 | 0 | 1   | 0 | 0   | 0 |
| ENSP00000430517 | ANXA6         | 641  | 0 | 0 | 1   | 0 | 1   | 0 |
| ENSP00000430774 | CTD-2410N18.5 | 91   | 0 | 0 | 1   | 1 | 1   | 0 |
| ENSP00000431042 | DCTN4         | 86   | 0 | 0 | 1   | 0 | 0   | 0 |
| ENSP00000431150 | RBM25         | 843  | 0 | 0 | 1   | 0 | 0   | 0 |
| ENSP00000431587 | TSTA3         | 268  | 0 | 0 | 1   | 0 | 0   | 0 |
| ENSP00000431883 | JAM3          | 355  | 0 | 0 | 1   | 0 | 0   | 1 |
| ENSP00000433089 | TTYH2         | 513  | 0 | 0 | 1   | 0 | 0   | 0 |
| ENSP00000433206 | JAM3          | 124  | 0 | 0 | 1   | 0 | 0   | 0 |
| ENSP00000433598 | PPP2R1B       | 224  | 0 | 0 | 1   | 0 | 1   | 1 |
| ENSP00000434033 | RAP1GAP       | 617  | 0 | 0 | 1   | 0 | 0   | 0 |
| ENSP00000435235 | IPO7          | 130  | 0 | 0 | 1   | 1 | 1   | 0 |
| ENSP00000435735 | TMX4          | 198  | 0 | 0 | 1   | 0 | 0   | 0 |
| ENSP00000436348 | EPB41L2       | 935  | 0 | 0 | 2   | 1 | 3.5 | 0 |
| ENSP00000436799 | FAIM3         | 125  | 0 | 0 | 1   | 0 | 0   | 0 |
| ENSP00000437383 | ACTR2         | 305  | 0 | 0 | 2   | 0 | 0   | 0 |
| ENSP00000437565 | ATP5C1        | 250  | 0 | 0 | 1   | 0 | 0   | 0 |
| ENSP00000437606 | COPS3         | 403  | 0 | 0 | 1   | 0 | 0   | 0 |
| ENSP00000437959 | POSTN         | 781  | 0 | 0 | 1   | 0 | 0   | 0 |
| ENSP00000439042 | OAT           | 301  | 0 | 0 | 1   | 0 | 0   | 0 |
| ENSP00000439211 | ZNF611        | 705  | 0 | 0 | 1   | 0 | 0   | 0 |
| ENSP00000439837 | PLEKHA5       | 1098 | 0 | 0 | 1   | 0 | 0   | 0 |
| ENSP00000439920 | SCN3A         | 483  | 0 | 0 | 1   | 0 | 0   | 0 |
| ENSP00000440564 | ITPR1         | 721  | 0 | 0 | 1   | 0 | 0   | 0 |
| ENSP00000440611 | PLEKHA5       | 874  | 0 | 0 | 1   | 0 | 0   | 0 |
| ENSP00000440761 | PDHA1         | 359  | 0 | 0 | 1   | 0 | 0   | 0 |
| ENSP00000441762 | NUP85         | 610  | 0 | 0 | 1   | 0 | 0   | 0 |
| ENSP00000442427 | DLAT          | 418  | 0 | 0 | 1   | 0 | 0   | 0 |
| ENSP00000442784 | CEP112        | 955  | 0 | 0 | 1   | 0 | 0   | 0 |
| ENSP00000443510 | AGPAT3        | 376  | 0 | 0 | 1   | 0 | 0   | 0 |
| ENSP00000443925 | PSMD7         | 247  | 0 | 0 | 1   | 0 | 0   | 0 |
| ENSP00000444345 | XPOT          | 228  | 0 | 0 | 1   | 0 | 1   | 1 |
| ENSP00000444354 | BUB3          | 248  | 0 | 0 | 1   | 0 | 0   | 0 |
| ENSP00000444423 | TCP1          | 100  | 0 | 0 | 1   | 0 | 1   | 0 |
| ENSP00000444815 | FHL1          | 280  | 0 | 0 | 1   | 0 | 1   | 0 |

|                 |            |       |   |   |   |   |     |   |
|-----------------|------------|-------|---|---|---|---|-----|---|
| ENSP00000444984 | CCT8       | 529   | 0 | 0 | 1 | 1 | 3   | 0 |
| ENSP00000445006 | KPNB1      | 660   | 0 | 0 | 1 | 0 | 1   | 0 |
| ENSP00000445087 | NXN        | 126   | 0 | 0 | 1 | 0 | 3   | 1 |
| ENSP00000445546 | PSMC2      | 296   | 0 | 0 | 1 | 0 | 1   | 0 |
| ENSP00000446231 | GOLT1B     | 74    | 0 | 0 | 1 | 1 | 0   | 0 |
| ENSP00000446258 | VEPH1      | 788   | 0 | 0 | 1 | 0 | 0   | 0 |
| ENSP00000446439 | KIAA0513   | 401   | 0 | 0 | 1 | 0 | 0   | 0 |
| ENSP00000446569 | CCDC65     | 373   | 0 | 0 | 1 | 0 | 0   | 0 |
| ENSP00000446740 | PFKM       | 41    | 0 | 0 | 1 | 0 | 1   | 0 |
| ENSP00000447472 | ERP29      | 95    | 0 | 0 | 1 | 0 | 0   | 0 |
| ENSP00000447514 | MCRS1      | 318   | 0 | 0 | 1 | 0 | 0   | 0 |
| ENSP00000447534 | CORO1C     | 480   | 0 | 0 | 1 | 0 | 0   | 0 |
| ENSP00000447895 | RAB5B      | 115   | 0 | 0 | 1 | 0 | 1   | 1 |
| ENSP00000448179 | ALDH2      | 79    | 0 | 0 | 1 | 0 | 0   | 0 |
| ENSP00000448415 | SCN8A      | 972   | 0 | 0 | 1 | 0 | 0   | 0 |
| ENSP00000448847 | PCBP2      | 160   | 0 | 0 | 1 | 0 | 0   | 0 |
| ENSP00000449330 | CORO1C     | 181   | 0 | 0 | 1 | 0 | 0   | 0 |
| ENSP00000449970 | HLA-DQA1   | 191   | 0 | 0 | 1 | 0 | 0   | 0 |
| ENSP00000450281 | AL021546.6 | 168   | 0 | 0 | 1 | 0 | 0   | 0 |
| ENSP00000450528 | PSMA6      | 203   | 0 | 0 | 1 | 0 | 2   | 0 |
| ENSP00000450636 | WDR20      | 520   | 0 | 0 | 1 | 0 | 0   | 0 |
| ENSP00000450834 | ATP6V1D    | 44    | 0 | 0 | 1 | 0 | 0.5 | 1 |
| ENSP00000451376 | NRG3       | 526   | 0 | 0 | 1 | 0 | 0   | 0 |
| ENSP00000451576 | GNG2       | 71    | 0 | 0 | 3 | 0 | 2   | 1 |
| ENSP00000451751 | C14orf166  | 68    | 0 | 0 | 1 | 0 | 1   | 0 |
| ENSP00000453792 | ARNT2      | 706   | 0 | 0 | 1 | 0 | 0   | 0 |
| ENSP00000454243 | AC114783.1 | 121   | 0 | 0 | 1 | 0 | 0   | 0 |
| ENSP00000454591 | FAM188B2   | 356   | 0 | 0 | 1 | 0 | 0   | 0 |
| ENSP00000454905 | GAS8       | 117   | 0 | 0 | 1 | 0 | 0   | 0 |
| ENSP00000455066 | PMM2       | 91    | 0 | 0 | 1 | 0 | 1   | 0 |
| ENSP00000455096 | AC114783.1 | 84    | 0 | 0 | 1 | 0 | 0   | 0 |
| ENSP00000455188 | RPL7A      | 266   | 0 | 0 | 1 | 0 | 0   | 0 |
| ENSP00000455635 | CNOT1      | 2371  | 0 | 0 | 1 | 0 | 0   | 0 |
| ENSP00000456060 | SH2B2      | 243   | 0 | 0 | 1 | 0 | 0   | 0 |
| ENSP00000456313 | ADAMTSL3   | 1682  | 0 | 0 | 1 | 0 | 0   | 0 |
| ENSP00000456649 | CNOT1      | 2150  | 0 | 0 | 2 | 1 | 0   | 0 |
| ENSP00000456842 | PCBP2      | 184   | 0 | 0 | 1 | 0 | 0   | 0 |
| ENSP00000457358 | DENND4A    | 1001  | 0 | 0 | 1 | 0 | 0   | 0 |
| ENSP00000457885 | MPI        | 339   | 0 | 0 | 1 | 0 | 0   | 0 |
| ENSP00000458660 | PHLPP2     | 723   | 0 | 0 | 2 | 0 | 0   | 0 |
| ENSP00000459227 | PRKCB      | 119   | 0 | 0 | 1 | 0 | 0   | 0 |
| ENSP00000461168 | NLGN2      | 835   | 0 | 0 | 1 | 0 | 0   | 0 |
| ENSP00000461238 | CHMP6      | 173   | 0 | 0 | 1 | 0 | 0   | 0 |
| ENSP00000461405 | SERPINF1   | 138   | 0 | 0 | 1 | 0 | 0   | 0 |
| ENSP00000461562 | NXN        | 230   | 0 | 0 | 1 | 0 | 3   | 1 |
| ENSP00000461610 | JH8        | 556   | 0 | 0 | 1 | 0 | 0   | 0 |
| ENSP00000462109 | TANC2      | 1254  | 0 | 0 | 1 | 0 | 0   | 0 |
| ENSP00000463067 | EIF4A1     | 117   | 0 | 0 | 1 | 2 | 0   | 0 |
| ENSP00000463481 | MRPS23     | 61    | 0 | 0 | 1 | 0 | 0   | 0 |
| ENSP00000463831 | PIP4K2B    | 71    | 0 | 0 | 1 | 0 | 0   | 0 |
| ENSP00000464434 | PSMD11     | 187   | 0 | 0 | 1 | 0 | 1   | 0 |
| ENSP00000465019 | PFN1       | 104   | 0 | 0 | 1 | 0 | 0   | 2 |
| ENSP00000465259 | ATP5A1     | 144   | 0 | 0 | 1 | 0 | 0   | 1 |
| ENSP00000465570 | TTN        | 34350 | 0 | 0 | 1 | 0 | 0   | 0 |
| ENSP00000466015 | ACAA2      | 394   | 0 | 0 | 1 | 0 | 0   | 0 |
| ENSP00000466651 | PRKACA     | 343   | 0 | 0 | 1 | 1 | 1   | 1 |
| ENSP00000466842 | TARDBP     | 222   | 0 | 0 | 1 | 0 | 0   | 0 |
| ENSP00000466852 | ATP6V0A1   | 191   | 0 | 0 | 1 | 1 | 0   | 0 |

|                 |                |       |   |   |   |   |   |   |
|-----------------|----------------|-------|---|---|---|---|---|---|
| ENSP00000467012 | CHST8          | 178   | 0 | 0 | 1 | 0 | 0 | 0 |
| ENSP00000467141 | TTN            | 35991 | 0 | 0 | 1 | 0 | 0 | 0 |
| ENSP00000467724 | SLC39A6        | 273   | 0 | 0 | 1 | 0 | 0 | 0 |
| ENSP00000467805 | EFTUD2         | 972   | 0 | 0 | 1 | 0 | 1 | 0 |
| ENSP00000468169 | ATP6V0A1       | 129   | 0 | 0 | 1 | 0 | 0 | 0 |
| ENSP00000468214 | RUNDC3A        | 400   | 0 | 0 | 1 | 0 | 0 | 0 |
| ENSP00000468246 | TPM4           | 170   | 0 | 0 | 1 | 0 | 0 | 0 |
| ENSP00000469457 | ENO2           | 434   | 0 | 0 | 1 | 0 | 2 | 2 |
| ENSP00000469913 | HNRNPL         | 198   | 0 | 0 | 1 | 0 | 0 | 0 |
| ENSP00000469936 | TUBB4A         | 160   | 0 | 0 | 2 | 0 | 0 | 1 |
| ENSP00000470204 | SYP            | 203   | 0 | 0 | 1 | 0 | 1 | 0 |
| ENSP00000471264 | PPFIA4         | 692   | 0 | 0 | 1 | 1 | 0 | 0 |
| ENSP00000471961 | CHMP2A         | 159   | 0 | 0 | 1 | 0 | 0 | 0 |
| ENSP00000472680 | CHMP2A         | 222   | 0 | 0 | 2 | 0 | 0 | 0 |
| ENSP00000473461 | NDUFA6         | 128   | 0 | 0 | 1 | 0 | 0 | 0 |
| ENSP00000474534 | HSPE1-MOB4     | 261   | 0 | 0 | 1 | 0 | 1 | 1 |
| ENSP00000475352 | SSBP4          | 206   | 0 | 0 | 1 | 0 | 0 | 0 |
| ENSP00000476819 | RP11-1407O15.2 | 478   | 0 | 0 | 1 | 0 | 1 | 1 |
| ENSP00000476998 | TKT            | 623   | 0 | 0 | 1 | 0 | 2 | 0 |
| ENSP00000020673 | PSD            | 1024  | 0 | 0 | 0 | 1 | 0 | 0 |
| ENSP00000023897 | GABRA1         | 456   | 0 | 0 | 0 | 1 | 0 | 0 |
| ENSP00000160373 | CTTNBP2        | 1663  | 0 | 0 | 0 | 1 | 0 | 0 |
| ENSP00000205061 | GLG1           | 1203  | 0 | 0 | 0 | 1 | 0 | 0 |
| ENSP00000205214 | AASDH          | 1098  | 0 | 0 | 0 | 1 | 0 | 0 |
| ENSP00000216286 | NID2           | 1375  | 0 | 0 | 0 | 1 | 0 | 0 |
| ENSP00000216445 | C14orf105      | 296   | 0 | 0 | 0 | 1 | 0 | 0 |
| ENSP00000218867 | SGCG           | 291   | 0 | 0 | 0 | 1 | 1 | 0 |
| ENSP00000220876 | STMN2          | 179   | 0 | 0 | 0 | 1 | 0 | 0 |
| ENSP00000221249 | PNPLA6         | 1327  | 0 | 0 | 0 | 1 | 0 | 0 |
| ENSP00000228567 | SYT10          | 523   | 0 | 0 | 0 | 1 | 0 | 0 |
| ENSP00000229135 | IFNG           | 166   | 0 | 0 | 0 | 1 | 0 | 0 |
| ENSP00000229330 | HCFC2          | 792   | 0 | 0 | 0 | 1 | 0 | 0 |
| ENSP00000232603 | MORC1          | 984   | 0 | 0 | 0 | 1 | 0 | 0 |
| ENSP00000233072 | CPS1           | 1500  | 0 | 0 | 0 | 1 | 0 | 0 |
| ENSP00000236671 | CTSD           | 412   | 0 | 0 | 0 | 1 | 0 | 0 |
| ENSP00000244230 | MPHOSPH10      | 681   | 0 | 0 | 0 | 1 | 0 | 0 |
| ENSP00000245206 | GOT2           | 430   | 0 | 0 | 0 | 1 | 1 | 1 |
| ENSP00000247087 | AHDC1          | 1603  | 0 | 0 | 0 | 1 | 0 | 1 |
| ENSP00000249130 | SULT4A1        | 260   | 0 | 0 | 0 | 1 | 0 | 0 |
| ENSP00000252071 | ACTR3C         | 210   | 0 | 0 | 0 | 1 | 1 | 1 |
| ENSP00000252483 | PVRL2          | 538   | 0 | 0 | 0 | 1 | 0 | 0 |
| ENSP00000252485 | PVRL2          | 479   | 0 | 0 | 0 | 1 | 0 | 0 |
| ENSP00000252773 | UNC13A         | 1703  | 0 | 0 | 0 | 1 | 0 | 0 |
| ENSP00000254658 | PER2           | 404   | 0 | 0 | 0 | 1 | 0 | 0 |
| ENSP00000256652 | CD101          | 1021  | 0 | 0 | 0 | 1 | 0 | 0 |
| ENSP00000256707 | KIDINS220      | 1771  | 0 | 0 | 0 | 1 | 0 | 0 |
| ENSP00000257497 | ANXA1          | 346   | 0 | 0 | 0 | 1 | 0 | 0 |
| ENSP00000258960 | NMT1           | 496   | 0 | 0 | 0 | 1 | 1 | 0 |
| ENSP00000259808 | RIPK1          | 671   | 0 | 0 | 0 | 1 | 1 | 0 |
| ENSP00000260359 | NUSAP1         | 426   | 0 | 0 | 0 | 1 | 0 | 0 |
| ENSP00000261509 | PALLD          | 1106  | 0 | 0 | 0 | 1 | 0 | 0 |
| ENSP00000261729 | RASAL1         | 804   | 0 | 0 | 0 | 2 | 1 | 0 |
| ENSP00000262506 | CSNK2A2        | 350   | 0 | 0 | 0 | 1 | 0 | 0 |
| ENSP00000263461 | WDR11          | 1224  | 0 | 0 | 0 | 1 | 0 | 0 |
| ENSP00000263525 | TNR            | 1358  | 0 | 0 | 0 | 1 | 0 | 0 |
| ENSP00000263663 | TAF1B          | 588   | 0 | 0 | 0 | 1 | 0 | 0 |
| ENSP00000263969 | MFN1           | 741   | 0 | 0 | 0 | 1 | 0 | 0 |
| ENSP00000264203 | CAPZB          | 260   | 0 | 0 | 0 | 1 | 0 | 0 |

|                 |          |      |   |   |   |   |   |   |
|-----------------|----------|------|---|---|---|---|---|---|
| ENSP00000264221 | PAICS    | 425  | 0 | 0 | 0 | 1 | 0 | 0 |
| ENSP00000264436 | ADD2     | 726  | 0 | 0 | 0 | 1 | 0 | 0 |
| ENSP00000265447 | ANXA11   | 505  | 0 | 0 | 0 | 1 | 0 | 0 |
| ENSP00000265634 | NPTX2    | 431  | 0 | 0 | 0 | 2 | 0 | 0 |
| ENSP00000265678 | RPS6KA2  | 733  | 0 | 0 | 0 | 1 | 0 | 0 |
| ENSP00000265724 | ABCB1    | 1280 | 0 | 0 | 0 | 2 | 0 | 0 |
| ENSP00000267079 | MAP3K12  | 859  | 0 | 0 | 0 | 1 | 0 | 0 |
| ENSP00000267568 | PTGR2    | 351  | 0 | 0 | 0 | 1 | 0 | 0 |
| ENSP00000267853 | MYZAP    | 466  | 0 | 0 | 0 | 1 | 0 | 0 |
| ENSP00000268852 | MYO19    | 770  | 0 | 0 | 0 | 1 | 0 | 0 |
| ENSP00000269321 | ARHGDI2  | 204  | 0 | 0 | 0 | 1 | 1 | 0 |
| ENSP00000271452 | NUF2     | 464  | 0 | 0 | 0 | 1 | 0 | 0 |
| ENSP00000272371 | OTOF     | 1997 | 0 | 0 | 0 | 1 | 0 | 0 |
| ENSP00000272849 | NRP2     | 906  | 0 | 0 | 0 | 1 | 0 | 0 |
| ENSP00000273859 | ATP10D   | 1426 | 0 | 0 | 0 | 1 | 0 | 0 |
| ENSP00000274026 | CCNA2    | 432  | 0 | 0 | 0 | 1 | 0 | 0 |
| ENSP00000274546 | GABRB2   | 474  | 0 | 0 | 0 | 1 | 0 | 0 |
| ENSP00000275162 | CLVS2    | 327  | 0 | 0 | 0 | 1 | 0 | 0 |
| ENSP00000275764 | STRA8    | 330  | 0 | 0 | 0 | 1 | 0 | 0 |
| ENSP00000280772 | ANK3     | 4377 | 0 | 0 | 0 | 1 | 0 | 0 |
| ENSP00000280886 | DIP2C    | 1556 | 0 | 0 | 0 | 2 | 0 | 0 |
| ENSP00000281828 | FARSB    | 589  | 0 | 0 | 0 | 1 | 0 | 0 |
| ENSP00000283426 | PLEKHG4B | 1271 | 0 | 0 | 0 | 1 | 0 | 0 |
| ENSP00000284674 | GPR26    | 337  | 0 | 0 | 0 | 1 | 0 | 0 |
| ENSP00000286067 | C10orf12 | 1247 | 0 | 0 | 0 | 1 | 0 | 0 |
| ENSP00000287394 | ATAD2    | 1390 | 0 | 0 | 0 | 1 | 0 | 0 |
| ENSP00000290795 | GPBP1L1  | 474  | 0 | 0 | 0 | 1 | 0 | 0 |
| ENSP00000294309 | TPCN2    | 752  | 0 | 0 | 0 | 1 | 1 | 0 |
| ENSP00000294981 | MAPKAPK2 | 370  | 0 | 0 | 0 | 1 | 0 | 0 |
| ENSP00000297508 | MICALL2  | 904  | 0 | 0 | 0 | 1 | 0 | 0 |
| ENSP00000299045 | TCP11L2  | 519  | 0 | 0 | 0 | 1 | 0 | 0 |
| ENSP00000299441 | DCHS1    | 3298 | 0 | 0 | 0 | 1 | 1 | 0 |
| ENSP00000299927 | ZNF592   | 1267 | 0 | 0 | 0 | 1 | 0 | 0 |
| ENSP00000300862 | HIF3A    | 667  | 0 | 0 | 0 | 1 | 0 | 0 |
| ENSP00000303554 | PTPN9    | 593  | 0 | 0 | 0 | 1 | 0 | 0 |
| ENSP00000304185 | GTSF1    | 167  | 0 | 0 | 0 | 1 | 0 | 0 |
| ENSP00000304592 | FASN     | 2511 | 0 | 0 | 0 | 1 | 0 | 0 |
| ENSP00000304743 | CLASP2   | 995  | 0 | 0 | 0 | 1 | 1 | 0 |
| ENSP00000305027 | SOGA2    | 1905 | 0 | 0 | 0 | 1 | 0 | 0 |
| ENSP00000306606 | ADH1B    | 375  | 0 | 0 | 0 | 1 | 0 | 0 |
| ENSP00000307129 | C8orf74  | 294  | 0 | 0 | 0 | 1 | 0 | 0 |
| ENSP00000307705 | HIST1H1E | 219  | 0 | 0 | 0 | 2 | 0 | 0 |
| ENSP00000308820 | RIC3     | 369  | 0 | 0 | 0 | 1 | 0 | 1 |
| ENSP00000309548 | PDP2     | 529  | 0 | 0 | 0 | 1 | 0 | 0 |
| ENSP00000311134 | RABL6    | 729  | 0 | 0 | 0 | 1 | 0 | 0 |
| ENSP00000312769 | PPIE     | 301  | 0 | 0 | 0 | 1 | 1 | 0 |
| ENSP00000312860 | TOM1L2   | 462  | 0 | 0 | 0 | 1 | 0 | 0 |
| ENSP00000313214 | TMUB2    | 301  | 0 | 0 | 0 | 1 | 0 | 0 |
| ENSP00000314036 | AGPAT4   | 378  | 0 | 0 | 0 | 1 | 0 | 0 |
| ENSP00000314837 | KLC2     | 622  | 0 | 0 | 0 | 1 | 0 | 0 |
| ENSP00000315328 | CELF2    | 490  | 0 | 0 | 0 | 1 | 0 | 0 |
| ENSP00000316029 | TLN1     | 2541 | 0 | 0 | 0 | 1 | 0 | 0 |
| ENSP00000316809 | PITPNA   | 270  | 0 | 0 | 0 | 1 | 0 | 0 |
| ENSP00000317749 | C1orf167 | 828  | 0 | 0 | 0 | 1 | 0 | 0 |
| ENSP00000318466 | WDFY3    | 3509 | 0 | 0 | 0 | 1 | 0 | 0 |
| ENSP00000319473 | PHF8     | 878  | 0 | 0 | 0 | 1 | 0 | 0 |
| ENSP00000321706 | GEMIN4   | 1058 | 0 | 0 | 0 | 1 | 0 | 0 |
| ENSP00000322706 | HMGCS1   | 520  | 0 | 0 | 0 | 2 | 0 | 1 |

|                 |          |      |   |   |   |   |   |   |
|-----------------|----------|------|---|---|---|---|---|---|
| ENSP00000323557 | BRD9     | 501  | 0 | 0 | 0 | 1 | 0 | 0 |
| ENSP00000324074 | ANP32E   | 268  | 0 | 0 | 0 | 1 | 0 | 0 |
| ENSP00000326804 | CUL1     | 776  | 0 | 0 | 0 | 1 | 1 | 0 |
| ENSP00000329161 | SEPT9    | 568  | 0 | 0 | 0 | 1 | 0 | 0 |
| ENSP00000329419 | COPB2    | 906  | 0 | 0 | 0 | 1 | 1 | 0 |
| ENSP00000330836 | GLRX3    | 335  | 0 | 0 | 0 | 1 | 0 | 0 |
| ENSP00000331817 | ALYREF   | 257  | 0 | 0 | 0 | 1 | 0 | 0 |
| ENSP00000332816 | PTK2B    | 1009 | 0 | 0 | 0 | 1 | 0 | 0 |
| ENSP00000334156 | SPTBN1   | 2155 | 0 | 0 | 0 | 4 | 6 | 1 |
| ENSP00000334910 | PDE2A    | 941  | 0 | 0 | 0 | 1 | 2 | 0 |
| ENSP00000335592 | GABRA5   | 462  | 0 | 0 | 0 | 1 | 0 | 0 |
| ENSP00000335632 | CHP1     | 195  | 0 | 0 | 0 | 1 | 1 | 0 |
| ENSP00000336127 | TTC7B    | 843  | 0 | 0 | 0 | 1 | 0 | 0 |
| ENSP00000340051 | PHF8     | 948  | 0 | 0 | 0 | 1 | 0 | 0 |
| ENSP00000340167 | OLA1     | 238  | 0 | 0 | 0 | 1 | 0 | 0 |
| ENSP00000340210 | CD59     | 128  | 0 | 0 | 0 | 1 | 0 | 1 |
| ENSP00000340328 | NYX      | 481  | 0 | 0 | 0 | 1 | 0 | 0 |
| ENSP00000340688 | LPHN1    | 1474 | 0 | 0 | 0 | 1 | 1 | 0 |
| ENSP00000340888 | GSN      | 731  | 0 | 0 | 0 | 1 | 0 | 0 |
| ENSP00000340889 | PRSS3    | 261  | 0 | 0 | 0 | 3 | 0 | 0 |
| ENSP00000343021 | ALKBH2   | 261  | 0 | 0 | 0 | 1 | 0 | 0 |
| ENSP00000343087 | CCDC157  | 752  | 0 | 0 | 0 | 1 | 0 | 0 |
| ENSP00000343147 | PPP3CB   | 496  | 0 | 0 | 0 | 1 | 0 | 0 |
| ENSP00000343966 | PSPC1    | 523  | 0 | 0 | 0 | 1 | 0 | 1 |
| ENSP00000344055 | AP3D1    | 1153 | 0 | 0 | 0 | 1 | 0 | 0 |
| ENSP00000344129 | ZNF648   | 568  | 0 | 0 | 0 | 1 | 0 | 0 |
| ENSP00000344658 | SNCG     | 126  | 0 | 0 | 0 | 1 | 0 | 0 |
| ENSP00000345137 | OTOF     | 1230 | 0 | 0 | 0 | 1 | 0 | 0 |
| ENSP00000345923 | BCOR     | 1721 | 0 | 0 | 0 | 1 | 0 | 0 |
| ENSP00000346139 | TBC1D20  | 403  | 0 | 0 | 0 | 1 | 0 | 0 |
| ENSP00000346791 | TTC3     | 2025 | 0 | 0 | 0 | 1 | 0 | 0 |
| ENSP00000347224 | GPBP1L1  | 474  | 0 | 0 | 0 | 1 | 0 | 0 |
| ENSP00000347380 | SYNCRIP  | 562  | 0 | 0 | 0 | 1 | 2 | 1 |
| ENSP00000347416 | AP3D1    | 1215 | 0 | 0 | 0 | 1 | 0 | 0 |
| ENSP00000347866 | PHACTR3  | 518  | 0 | 0 | 0 | 1 | 0 | 0 |
| ENSP00000348877 | GPI      | 558  | 0 | 0 | 0 | 1 | 0 | 0 |
| ENSP00000349259 | SPTBN1   | 2364 | 0 | 0 | 0 | 4 | 6 | 2 |
| ENSP00000349420 | GPM6B    | 265  | 0 | 0 | 0 | 1 | 0 | 1 |
| ENSP00000349564 | TTC7B    | 860  | 0 | 0 | 0 | 1 | 0 | 0 |
| ENSP00000349594 | ELAVL4   | 383  | 0 | 0 | 0 | 1 | 0 | 0 |
| ENSP00000349887 | ASNA1    | 348  | 0 | 0 | 0 | 1 | 0 | 0 |
| ENSP00000350012 | ACSL3    | 720  | 0 | 0 | 0 | 1 | 2 | 0 |
| ENSP00000351047 | ICA1L    | 482  | 0 | 0 | 0 | 1 | 0 | 0 |
| ENSP00000352219 | BCS1L    | 419  | 0 | 0 | 0 | 1 | 1 | 0 |
| ENSP00000353002 | PHACTR3  | 556  | 0 | 0 | 0 | 1 | 0 | 0 |
| ENSP00000353114 | AHNAK2   | 5795 | 0 | 0 | 0 | 1 | 0 | 0 |
| ENSP00000353129 | KCTD8    | 473  | 0 | 0 | 0 | 1 | 0 | 0 |
| ENSP00000353397 | TP53TG3C | 102  | 0 | 0 | 0 | 1 | 0 | 0 |
| ENSP00000353408 | MSN      | 577  | 0 | 0 | 0 | 1 | 0 | 0 |
| ENSP00000353467 | FLNA     | 2639 | 0 | 0 | 0 | 1 | 0 | 1 |
| ENSP00000354109 | RGS22    | 1264 | 0 | 0 | 0 | 2 | 0 | 0 |
| ENSP00000354335 | MPEG1    | 716  | 0 | 0 | 0 | 1 | 0 | 0 |
| ENSP00000354481 | BRINP2   | 783  | 0 | 0 | 0 | 1 | 0 | 0 |
| ENSP00000354536 | ASTN1    | 1294 | 0 | 0 | 0 | 1 | 0 | 0 |
| ENSP00000354597 | DENND4B  | 1496 | 0 | 0 | 0 | 1 | 0 | 0 |
| ENSP00000355013 | CTR9     | 1173 | 0 | 0 | 0 | 1 | 0 | 0 |
| ENSP00000355124 | KRT19    | 400  | 0 | 0 | 0 | 1 | 0 | 0 |
| ENSP00000355348 | NCKAP1   | 1128 | 0 | 0 | 0 | 1 | 0 | 1 |



|                 |          |      |   |   |   |     |   |   |
|-----------------|----------|------|---|---|---|-----|---|---|
| ENSP00000355513 | KMO      | 182  | 0 | 0 | 0 | 1   | 0 | 0 |
| ENSP00000355517 | KMO      | 486  | 0 | 0 | 0 | 1   | 0 | 0 |
| ENSP00000355523 | RGS7     | 487  | 0 | 0 | 0 | 1   | 0 | 0 |
| ENSP00000355872 | AGPAT4   | 159  | 0 | 0 | 0 | 1   | 0 | 0 |
| ENSP00000355890 | EPRS     | 1512 | 0 | 0 | 0 | 1   | 1 | 2 |
| ENSP00000356097 | FAM72A   | 149  | 0 | 0 | 0 | 1   | 0 | 0 |
| ENSP00000356211 | TMEM183A | 376  | 0 | 0 | 0 | 2   | 0 | 1 |
| ENSP00000356459 | ADGB     | 112  | 0 | 0 | 0 | 1   | 0 | 0 |
| ENSP00000356918 | STX7     | 261  | 0 | 0 | 0 | 1   | 0 | 0 |
| ENSP00000357048 | COPA     | 1233 | 0 | 0 | 0 | 2   | 0 | 0 |
| ENSP00000357571 | TTC40    | 1530 | 0 | 0 | 0 | 1   | 0 | 0 |
| ENSP00000357633 | GLRX3    | 335  | 0 | 0 | 0 | 1   | 0 | 0 |
| ENSP00000357635 | DENND4B  | 1218 | 0 | 0 | 0 | 1   | 0 | 0 |
| ENSP00000358060 | TARS2    | 718  | 0 | 0 | 0 | 1   | 0 | 0 |
| ENSP00000358115 | ANP32E   | 220  | 0 | 0 | 0 | 1   | 0 | 0 |
| ENSP00000358400 | MDN1     | 5596 | 0 | 0 | 0 | 1   | 0 | 0 |
| ENSP00000358482 | CD101    | 1021 | 0 | 0 | 0 | 1   | 0 | 0 |
| ENSP00000358633 | G6PD     | 561  | 0 | 0 | 0 | 2   | 0 | 0 |
| ENSP00000358695 | CYB5R4   | 521  | 0 | 0 | 0 | 0.5 | 0 | 0 |
| ENSP00000358696 | PLXNA3   | 1871 | 0 | 0 | 0 | 1   | 0 | 0 |
| ENSP00000358842 | GSTM2    | 179  | 0 | 0 | 0 | 1   | 1 | 0 |
| ENSP00000358865 | INA      | 499  | 0 | 0 | 0 | 1   | 0 | 0 |
| ENSP00000359184 | AGL      | 1532 | 0 | 0 | 0 | 1   | 0 | 0 |
| ENSP00000360312 | BSND     | 320  | 0 | 0 | 0 | 1   | 0 | 0 |
| ENSP00000360718 | RAB3B    | 219  | 0 | 0 | 0 | 2   | 0 | 0 |
| ENSP00000360740 | RABL6    | 614  | 0 | 0 | 0 | 1   | 0 | 0 |
| ENSP00000360886 | ELAVL4   | 385  | 0 | 0 | 0 | 1   | 0 | 0 |
| ENSP00000361305 | ANXA11   | 505  | 0 | 0 | 0 | 1   | 0 | 0 |
| ENSP00000361464 | DLG5     | 1579 | 0 | 0 | 0 | 1   | 0 | 0 |
| ENSP00000362016 | MACF1    | 4434 | 0 | 0 | 0 | 1   | 1 | 0 |
| ENSP00000362327 | PPA1     | 178  | 0 | 0 | 0 | 1   | 0 | 0 |
| ENSP00000362671 | RPL35    | 96   | 0 | 0 | 0 | 1   | 0 | 1 |
| ENSP00000362912 | GSN      | 207  | 0 | 0 | 0 | 1   | 0 | 0 |
| ENSP00000363123 | AHDC1    | 1603 | 0 | 0 | 0 | 1   | 0 | 1 |
| ENSP00000364590 | CUL4A    | 659  | 0 | 0 | 0 | 1   | 0 | 0 |
| ENSP00000365281 | BIN1     | 424  | 0 | 0 | 0 | 1   | 0 | 0 |
| ENSP00000365529 | GPR158   | 1215 | 0 | 0 | 0 | 1   | 0 | 0 |
| ENSP00000365633 | PDE2A    | 685  | 0 | 0 | 0 | 1   | 2 | 0 |
| ENSP00000367465 | NYX      | 481  | 0 | 0 | 0 | 1   | 0 | 0 |
| ENSP00000367716 | BCOR     | 1703 | 0 | 0 | 0 | 1   | 0 | 0 |
| ENSP00000367727 | PANK4    | 773  | 0 | 0 | 0 | 1   | 0 | 0 |
| ENSP00000368460 | PDK3     | 406  | 0 | 0 | 0 | 1   | 0 | 0 |
| ENSP00000368790 | MTRF1    | 445  | 0 | 0 | 0 | 1   | 0 | 0 |
| ENSP00000369769 | HSPH1    | 817  | 0 | 0 | 0 | 2   | 1 | 1 |
| ENSP00000369773 | RIPK1    | 671  | 0 | 0 | 0 | 1   | 0 | 0 |
| ENSP00000369942 | GCOM1    | 445  | 0 | 0 | 0 | 1   | 0 | 0 |
| ENSP00000370194 | GMDS     | 372  | 0 | 0 | 0 | 1   | 0 | 0 |
| ENSP00000370907 | DIP2C    | 656  | 0 | 0 | 0 | 1   | 0 | 0 |
| ENSP00000371267 | YWHAQ    | 245  | 0 | 0 | 0 | 2   | 0 | 0 |
| ENSP00000371294 | CTNS     | 400  | 0 | 0 | 0 | 1   | 1 | 0 |
| ENSP00000371310 | USP7     | 1086 | 0 | 0 | 0 | 1   | 0 | 0 |
| ENSP00000372025 | MBP      | 197  | 0 | 0 | 0 | 1   | 0 | 0 |
| ENSP00000373215 | CADPS    | 1353 | 0 | 0 | 0 | 2   | 0 | 1 |
| ENSP00000373637 | SMYD3    | 428  | 0 | 0 | 0 | 1   | 0 | 0 |
| ENSP00000374183 | CAMSAP1  | 1602 | 0 | 0 | 0 | 1   | 0 | 0 |
| ENSP00000374592 | ZC3H12D  | 527  | 0 | 0 | 0 | 1   | 0 | 0 |
| ENSP00000375712 | SMYD3    | 147  | 0 | 0 | 0 | 1   | 0 | 0 |
| ENSP00000376792 | VTI1A    | 217  | 0 | 0 | 0 | 1   | 0 | 0 |

|                 |         |      |   |   |   |     |   |     |
|-----------------|---------|------|---|---|---|-----|---|-----|
| ENSP00000377480 | MAGEA3  | 314  | 0 | 0 | 0 | 1   | 0 | 0   |
| ENSP00000377531 | GABRB2  | 512  | 0 | 0 | 0 | 1   | 0 | 0   |
| ENSP00000377641 | KLC2    | 333  | 0 | 0 | 0 | 1   | 0 | 0   |
| ENSP00000378306 | PPP3CB  | 525  | 0 | 0 | 0 | 1   | 0 | 0   |
| ENSP00000378887 | DHRS7B  | 325  | 0 | 0 | 0 | 1   | 0 | 0   |
| ENSP00000380602 | CNTN4   | 1026 | 0 | 0 | 0 | 1   | 0 | 0   |
| ENSP00000380878 | PPP3CC  | 521  | 0 | 0 | 0 | 1   | 0 | 0   |
| ENSP00000381036 | ADGB    | 1667 | 0 | 0 | 0 | 1   | 0 | 0   |
| ENSP00000381225 | CBS     | 551  | 0 | 0 | 0 | 1   | 0 | 0   |
| ENSP00000381339 | GNAT3   | 354  | 0 | 0 | 0 | 1   | 0 | 0   |
| ENSP00000382633 | STMN1   | 149  | 0 | 0 | 0 | 1   | 0 | 0   |
| ENSP00000384634 | EIF3L   | 466  | 0 | 0 | 0 | 1   | 1 | 1   |
| ENSP00000384892 | RIMS2   | 1349 | 0 | 0 | 0 | 1   | 0 | 1   |
| ENSP00000385357 | CCDC157 | 752  | 0 | 0 | 0 | 1   | 0 | 0   |
| ENSP00000385589 | SCARF2  | 865  | 0 | 0 | 0 | 1   | 0 | 0   |
| ENSP00000386104 | CPE     | 476  | 0 | 0 | 0 | 1   | 0 | 0   |
| ENSP00000386616 | ZC3H12D | 527  | 0 | 0 | 0 | 1   | 0 | 0   |
| ENSP00000387255 | XIRP2   | 3327 | 0 | 0 | 0 | 1   | 0 | 1   |
| ENSP00000387382 | ICA1L   | 119  | 0 | 0 | 0 | 1   | 0 | 0   |
| ENSP00000388530 | CELF2   | 490  | 0 | 0 | 0 | 1   | 0 | 0   |
| ENSP00000389062 | CLYBL   | 89   | 0 | 0 | 0 | 1   | 0 | 1   |
| ENSP00000390590 | DDN     | 711  | 0 | 0 | 0 | 1   | 0 | 0   |
| ENSP00000391007 | BCS1L   | 76   | 0 | 0 | 0 | 1   | 1 | 0   |
| ENSP00000391705 | MAPRE3  | 218  | 0 | 0 | 0 | 1   | 0 | 2   |
| ENSP00000392061 | DNAH14  | 4515 | 0 | 0 | 0 | 1   | 0 | 0   |
| ENSP00000392541 | ALB     | 197  | 0 | 0 | 0 | 1   | 0 | 0   |
| ENSP00000392683 | FLOT1   | 192  | 0 | 0 | 0 | 1   | 0 | 0   |
| ENSP00000393017 | FAM200B | 657  | 0 | 0 | 0 | 0.5 | 0 | 0.5 |
| ENSP00000393379 | KIF5C   | 957  | 0 | 0 | 0 | 1   | 0 | 0   |
| ENSP00000393810 | HBD     | 104  | 0 | 0 | 0 | 1   | 1 | 0   |
| ENSP00000393822 | EIF3L   | 183  | 0 | 0 | 0 | 1   | 1 | 0   |
| ENSP00000394100 | GOT2    | 387  | 0 | 0 | 0 | 2   | 1 | 1   |
| ENSP00000394504 | MDH1    | 119  | 0 | 0 | 0 | 1   | 0 | 0   |
| ENSP00000394690 | G6PD    | 256  | 0 | 0 | 0 | 1   | 0 | 0   |
| ENSP00000394770 | CMYA5   | 4069 | 0 | 0 | 0 | 1   | 0 | 0   |
| ENSP00000394993 | GGT7    | 202  | 0 | 0 | 0 | 1   | 2 | 2   |
| ENSP00000395041 | ASTN1   | 1216 | 0 | 0 | 0 | 1   | 0 | 0   |
| ENSP00000396376 | PPP1R7  | 282  | 0 | 0 | 0 | 1   | 0 | 0   |
| ENSP00000397782 | SYNCRIP | 185  | 0 | 0 | 0 | 1   | 2 | 1   |
| ENSP00000398015 | LDHB    | 136  | 0 | 0 | 0 | 2   | 0 | 2   |
| ENSP00000399273 | ETFA    | 284  | 0 | 0 | 0 | 1   | 0 | 0   |
| ENSP00000399729 | OGT     | 156  | 0 | 0 | 0 | 1   | 0 | 0   |
| ENSP00000399771 | RUFY3   | 506  | 0 | 0 | 0 | 1   | 0 | 0   |
| ENSP00000400031 | MTRF1   | 468  | 0 | 0 | 0 | 1   | 0 | 0   |
| ENSP00000401014 | NUSAP1  | 378  | 0 | 0 | 0 | 1   | 0 | 0   |
| ENSP00000401249 | PRSS3   | 177  | 0 | 0 | 0 | 1   | 0 | 0   |
| ENSP00000403793 | CYFIP2  | 952  | 0 | 0 | 0 | 1   | 1 | 0   |
| ENSP00000403943 | TTC3    | 1179 | 0 | 0 | 0 | 1   | 0 | 0   |
| ENSP00000404590 | TMOD2   | 315  | 0 | 0 | 0 | 1   | 0 | 0   |
| ENSP00000404618 | ICA1L   | 119  | 0 | 0 | 0 | 1   | 0 | 0   |
| ENSP00000407466 | RBM39   | 39   | 0 | 0 | 0 | 1   | 0 | 0   |
| ENSP00000408456 | TTC3    | 780  | 0 | 0 | 0 | 1   | 0 | 0   |
| ENSP00000408759 | KRT19   | 196  | 0 | 0 | 0 | 1   | 0 | 0   |
| ENSP00000409472 | DNAH14  | 3507 | 0 | 0 | 0 | 1   | 0 | 0   |
| ENSP00000410083 | VEZT    | 779  | 0 | 0 | 0 | 1   | 0 | 0   |
| ENSP00000411465 | CTNS    | 292  | 0 | 0 | 0 | 1   | 0 | 0   |
| ENSP00000412357 | ADD2    | 226  | 0 | 0 | 0 | 1   | 0 | 0   |
| ENSP00000412707 | SYNJ1   | 178  | 0 | 0 | 0 | 1   | 0 | 1   |

|                 |              |      |   |   |   |   |   |   |
|-----------------|--------------|------|---|---|---|---|---|---|
| ENSP00000413999 | CKMT1B       | 241  | 0 | 0 | 0 | 1 | 0 | 1 |
| ENSP00000414132 | ALDH7A1      | 502  | 0 | 0 | 0 | 1 | 0 | 0 |
| ENSP00000414220 | SULT4A1      | 75   | 0 | 0 | 0 | 1 | 0 | 0 |
| ENSP00000415441 | GABRA1       | 456  | 0 | 0 | 0 | 1 | 0 | 0 |
| ENSP00000415537 | SARDH        | 750  | 0 | 0 | 0 | 1 | 0 | 0 |
| ENSP00000415802 | DDX39B       | 325  | 0 | 0 | 0 | 1 | 0 | 0 |
| ENSP00000415840 | RP11-295K3.1 | 379  | 0 | 0 | 0 | 1 | 0 | 0 |
| ENSP00000416892 | EIF3L        | 564  | 0 | 0 | 0 | 1 | 2 | 1 |
| ENSP00000417282 | MORC1        | 963  | 0 | 0 | 0 | 1 | 0 | 0 |
| ENSP00000418448 | PDHB         | 350  | 0 | 0 | 0 | 1 | 0 | 0 |
| ENSP00000418994 | SYNPR        | 285  | 0 | 0 | 0 | 1 | 0 | 0 |
| ENSP00000419845 | BRD9         | 544  | 0 | 0 | 0 | 1 | 0 | 0 |
| ENSP00000419974 | CLASP2       | 1514 | 0 | 0 | 0 | 1 | 0 | 0 |
| ENSP00000420174 | ERVFRD-1     | 538  | 0 | 0 | 0 | 1 | 0 | 0 |
| ENSP00000420254 | ARF4         | 127  | 0 | 0 | 0 | 1 | 1 | 0 |
| ENSP00000420617 | MFN1         | 741  | 0 | 0 | 0 | 1 | 0 | 0 |
| ENSP00000421096 | PAICS        | 425  | 0 | 0 | 0 | 1 | 0 | 0 |
| ENSP00000422524 | NFASC        | 486  | 0 | 0 | 0 | 1 | 0 | 0 |
| ENSP00000423799 | ANK2         | 1114 | 0 | 0 | 0 | 1 | 0 | 0 |
| ENSP00000424341 | CANX         | 144  | 0 | 0 | 0 | 1 | 1 | 0 |
| ENSP00000425217 | GRIA2        | 124  | 0 | 0 | 0 | 1 | 0 | 0 |
| ENSP00000425236 | ANK3         | 1868 | 0 | 0 | 0 | 1 | 0 | 0 |
| ENSP00000425932 | PANK4        | 473  | 0 | 0 | 0 | 1 | 0 | 0 |
| ENSP00000426591 | ANXA3        | 55   | 0 | 0 | 0 | 1 | 0 | 0 |
| ENSP00000428837 | PTK2B        | 194  | 0 | 0 | 0 | 1 | 0 | 0 |
| ENSP00000429382 | RGS22        | 1083 | 0 | 0 | 0 | 2 | 0 | 0 |
| ENSP00000429562 | UNC13A       | 1703 | 0 | 0 | 0 | 1 | 0 | 0 |
| ENSP00000430058 | YWHAZ        | 246  | 0 | 0 | 0 | 1 | 0 | 0 |
| ENSP00000430572 | ANXA6        | 129  | 0 | 0 | 0 | 1 | 0 | 0 |
| ENSP00000431675 | RABL6        | 471  | 0 | 0 | 0 | 1 | 0 | 0 |
| ENSP00000432280 | TBC1D20      | 403  | 0 | 0 | 0 | 1 | 0 | 0 |
| ENSP00000433475 | PPIE         | 213  | 0 | 0 | 0 | 1 | 1 | 0 |
| ENSP00000434003 | C14orf105    | 295  | 0 | 0 | 0 | 1 | 0 | 0 |
| ENSP00000434481 | CCT3         | 144  | 0 | 0 | 0 | 1 | 0 | 0 |
| ENSP00000435022 | INSC         | 520  | 0 | 0 | 0 | 1 | 0 | 0 |
| ENSP00000438090 | PRKCG        | 548  | 0 | 0 | 0 | 1 | 0 | 0 |
| ENSP00000438488 | CCT6A        | 500  | 0 | 0 | 0 | 1 | 0 | 0 |
| ENSP00000438604 | DDAH1        | 285  | 0 | 0 | 0 | 1 | 0 | 0 |
| ENSP00000438691 | SYT10        | 342  | 0 | 0 | 0 | 1 | 0 | 0 |
| ENSP00000438733 | ACO1         | 790  | 0 | 0 | 0 | 1 | 0 | 1 |
| ENSP00000439332 | CBS          | 463  | 0 | 0 | 0 | 1 | 0 | 0 |
| ENSP00000439381 | CLGN         | 610  | 0 | 0 | 0 | 1 | 0 | 0 |
| ENSP00000441848 | KCNJ2        | 427  | 0 | 0 | 0 | 1 | 0 | 0 |
| ENSP00000442232 | SGCG         | 291  | 0 | 0 | 0 | 1 | 1 | 0 |
| ENSP00000442942 | HCFC2        | 412  | 0 | 0 | 0 | 1 | 0 | 0 |
| ENSP00000442981 | TLN1         | 2429 | 0 | 0 | 0 | 1 | 0 | 0 |
| ENSP00000443009 | RAP1A        | 184  | 0 | 0 | 0 | 1 | 1 | 0 |
| ENSP00000443235 | RNF10        | 124  | 0 | 0 | 0 | 1 | 0 | 0 |
| ENSP00000443871 | RIC3         | 320  | 0 | 0 | 0 | 1 | 0 | 1 |
| ENSP00000444095 | ABCB1        | 1216 | 0 | 0 | 0 | 2 | 0 | 0 |
| ENSP00000446485 | GTSF1        | 167  | 0 | 0 | 0 | 1 | 0 | 0 |
| ENSP00000446500 | HLA-DOA      | 61   | 0 | 0 | 0 | 1 | 0 | 0 |
| ENSP00000447257 | DQ-A1        | 254  | 0 | 0 | 0 | 1 | 0 | 0 |
| ENSP00000447278 | KRT18        | 391  | 0 | 0 | 0 | 1 | 0 | 0 |
| ENSP00000447907 | DYNLL1       | 89   | 0 | 0 | 0 | 1 | 0 | 1 |
| ENSP00000447970 | HLA-DQA1     | 253  | 0 | 0 | 0 | 1 | 0 | 0 |
| ENSP00000448042 | PIP4K2C      | 171  | 0 | 0 | 0 | 2 | 1 | 0 |
| ENSP00000448629 | TCP11L2      | 234  | 0 | 0 | 0 | 1 | 0 | 0 |

|                 |            |      |   |   |   |     |   |   |
|-----------------|------------|------|---|---|---|-----|---|---|
| ENSP00000449038 | MAP3K12    | 892  | 0 | 0 | 0 | 1   | 0 | 0 |
| ENSP00000449285 | AL662890.2 | 42   | 0 | 0 | 0 | 1   | 0 | 0 |
| ENSP00000449395 | HLA-DOA    | 61   | 0 | 0 | 0 | 1   | 0 | 0 |
| ENSP00000450215 | HSP90B1    | 147  | 0 | 0 | 0 | 1   | 0 | 0 |
| ENSP00000450425 | CALM1      | 76   | 0 | 0 | 0 | 1   | 0 | 0 |
| ENSP00000450480 | ATP10A     | 594  | 0 | 0 | 0 | 1   | 0 | 0 |
| ENSP00000450625 | ACTN1      | 207  | 0 | 0 | 0 | 1   | 0 | 0 |
| ENSP00000451752 | SPTB       | 2328 | 0 | 0 | 0 | 1   | 0 | 1 |
| ENSP00000452777 | ETFA       | 289  | 0 | 0 | 0 | 1   | 0 | 0 |
| ENSP00000452964 | CCDC175    | 828  | 0 | 0 | 0 | 1   | 0 | 0 |
| ENSP00000453017 | ETFA       | 239  | 0 | 0 | 0 | 1   | 0 | 0 |
| ENSP00000453403 | NUSAP1     | 441  | 0 | 0 | 0 | 1   | 0 | 0 |
| ENSP00000453483 | CPNE6      | 105  | 0 | 0 | 0 | 1   | 0 | 0 |
| ENSP00000454096 | ANXA2      | 175  | 0 | 0 | 0 | 1   | 0 | 0 |
| ENSP00000454199 | CYFIP1     | 1253 | 0 | 0 | 0 | 1.5 | 0 | 0 |
| ENSP00000454218 | GLG1       | 698  | 0 | 0 | 0 | 1   | 0 | 0 |
| ENSP00000455773 | PLEC       | 4525 | 0 | 0 | 0 | 1   | 0 | 0 |
| ENSP00000458300 | P4HB       | 148  | 0 | 0 | 0 | 2   | 0 | 0 |
| ENSP00000458570 | PCDHGA4    | 931  | 0 | 0 | 0 | 1   | 0 | 0 |
| ENSP00000462387 | MAPKAPK2   | 400  | 0 | 0 | 0 | 1   | 0 | 0 |
| ENSP00000462844 | HYOU1      | 224  | 0 | 0 | 0 | 1   | 1 | 0 |
| ENSP00000462960 | ARHGDI1    | 193  | 0 | 0 | 0 | 1   | 1 | 0 |
| ENSP00000465871 | ZNF585B    | 137  | 0 | 0 | 0 | 1   | 0 | 0 |
| ENSP00000465939 | MAPRE2     | 134  | 0 | 0 | 0 | 1   | 0 | 0 |
| ENSP00000466971 | TMUB2      | 321  | 0 | 0 | 0 | 1   | 0 | 0 |
| ENSP00000468424 | NMT1       | 496  | 0 | 0 | 0 | 1   | 1 | 0 |
| ENSP00000468488 | MYO19      | 186  | 0 | 0 | 0 | 1   | 0 | 0 |
| ENSP00000468585 | DHRS7B     | 310  | 0 | 0 | 0 | 1   | 0 | 0 |
| ENSP00000468668 | SEPT9      | 422  | 0 | 0 | 0 | 1   | 0 | 0 |
| ENSP00000468882 | HNRNP2     | 449  | 0 | 0 | 0 | 1   | 0 | 0 |
| ENSP00000469988 | G6PD       | 561  | 0 | 0 | 0 | 1   | 0 | 0 |
| ENSP00000470631 | PLXNA3     | 1871 | 0 | 0 | 0 | 1   | 0 | 0 |
| ENSP00000470900 | GSPT2      | 628  | 0 | 0 | 0 | 0.5 | 0 | 0 |
| ENSP00000471208 | G6PD       | 515  | 0 | 0 | 0 | 2   | 0 | 0 |
| ENSP00000471265 | EEF2       | 85   | 0 | 0 | 0 | 2   | 0 | 0 |
| ENSP00000471378 | ZNF414     | 120  | 0 | 0 | 0 | 1   | 0 | 0 |
| ENSP00000472141 | CALM3      | 149  | 0 | 0 | 0 | 1   | 1 | 0 |
| ENSP00000472231 | RPS16      | 129  | 0 | 0 | 0 | 1   | 1 | 0 |
| ENSP00000472251 | PPFIA4     | 191  | 0 | 0 | 0 | 1   | 0 | 0 |
| ENSP00000473093 | MAGEA3     | 314  | 0 | 0 | 0 | 1   | 0 | 0 |
| ENSP00000473211 | PNPLA6     | 1365 | 0 | 0 | 0 | 1   | 0 | 0 |
| ENSP00000473512 | HSPH1      | 115  | 0 | 0 | 0 | 1   | 1 | 0 |
| ENSP00000473564 | AASDH      | 789  | 0 | 0 | 0 | 1   | 0 | 0 |
| ENSP00000476547 | CSNK2A1    | 74   | 0 | 0 | 0 | 1   | 0 | 0 |
| ENSP00000476596 | CLCN5      | 64   | 0 | 0 | 0 | 1   | 0 | 0 |
| ENSP0000007735  | KRT33A     | 404  | 0 | 0 | 0 | 0   | 3 | 4 |
| ENSP00000040738 | BOD1L1     | 3051 | 0 | 0 | 0 | 0   | 1 | 0 |
| ENSP00000080059 | HDAC7      | 991  | 0 | 0 | 0 | 0   | 1 | 0 |
| ENSP00000083182 | APPBP2     | 585  | 0 | 0 | 0 | 0   | 1 | 0 |
| ENSP00000165698 | REEP1      | 201  | 0 | 0 | 0 | 0   | 1 | 0 |
| ENSP00000173898 | TRO        | 1431 | 0 | 0 | 0 | 0   | 1 | 0 |
| ENSP00000215885 | PLA2G3     | 509  | 0 | 0 | 0 | 0   | 2 | 0 |
| ENSP00000216554 | EIF5       | 431  | 0 | 0 | 0 | 0   | 1 | 0 |
| ENSP00000216877 | PTPRA      | 793  | 0 | 0 | 0 | 0   | 1 | 0 |
| ENSP00000217244 | CSNK2A1    | 391  | 0 | 0 | 0 | 0   | 1 | 2 |
| ENSP00000224756 | CCSER2     | 834  | 0 | 0 | 0 | 0   | 1 | 0 |
| ENSP00000225831 | CCL2       | 99   | 0 | 0 | 0 | 0   | 1 | 0 |
| ENSP00000228740 | LTA4H      | 611  | 0 | 0 | 0 | 0   | 2 | 0 |

|                 |          |      |   |   |   |   |     |   |
|-----------------|----------|------|---|---|---|---|-----|---|
| ENSP00000233084 | DDX1     | 740  | 0 | 0 | 0 | 0 | 2   | 0 |
| ENSP00000233242 | APOB     | 4563 | 0 | 0 | 0 | 0 | 1   | 0 |
| ENSP00000236698 | STAG1    | 1221 | 0 | 0 | 0 | 0 | 1   | 0 |
| ENSP00000239882 | ELF1     | 619  | 0 | 0 | 0 | 0 | 2   | 0 |
| ENSP00000246639 | KRT35    | 425  | 0 | 0 | 0 | 0 | 3   | 0 |
| ENSP00000248846 | TUBGCP6  | 1819 | 0 | 0 | 0 | 0 | 1   | 1 |
| ENSP00000251076 | DMXL2    | 3036 | 0 | 0 | 0 | 0 | 4   | 2 |
| ENSP00000251091 | SAMD4A   | 630  | 0 | 0 | 0 | 0 | 1   | 0 |
| ENSP00000251472 | MAST1    | 1570 | 0 | 0 | 0 | 0 | 1   | 0 |
| ENSP00000251645 | KRT31    | 416  | 0 | 0 | 0 | 0 | 3   | 3 |
| ENSP00000251646 | KRT33B   | 404  | 0 | 0 | 0 | 0 | 1   | 0 |
| ENSP00000251722 | USP40    | 1235 | 0 | 0 | 0 | 0 | 1   | 0 |
| ENSP00000252594 | NSUN5    | 429  | 0 | 0 | 0 | 0 | 1   | 0 |
| ENSP00000253815 | UBE2D2   | 118  | 0 | 0 | 0 | 0 | 1   | 0 |
| ENSP00000254029 | WDR44    | 913  | 0 | 0 | 0 | 0 | 1   | 0 |
| ENSP00000255305 | XPO4     | 1151 | 0 | 0 | 0 | 0 | 1   | 1 |
| ENSP00000256433 | IER3IP1  | 82   | 0 | 0 | 0 | 0 | 1   | 1 |
| ENSP00000256578 | AMPD2    | 879  | 0 | 0 | 0 | 0 | 1   | 0 |
| ENSP00000257863 | AMHR2    | 573  | 0 | 0 | 0 | 0 | 1   | 0 |
| ENSP00000257901 | KRT85    | 507  | 0 | 0 | 0 | 0 | 13  | 8 |
| ENSP00000257974 | KRT82    | 513  | 0 | 0 | 0 | 0 | 4   | 0 |
| ENSP00000258106 | EMX1     | 290  | 0 | 0 | 0 | 0 | 1   | 0 |
| ENSP00000258187 | NDRG4    | 371  | 0 | 0 | 0 | 0 | 1   | 1 |
| ENSP00000258214 | CCDC102A | 550  | 0 | 0 | 0 | 0 | 1   | 0 |
| ENSP00000258729 | IGF2BP3  | 579  | 0 | 0 | 0 | 0 | 0.5 | 0 |
| ENSP00000258770 | TBRG4    | 631  | 0 | 0 | 0 | 0 | 1   | 0 |
| ENSP00000260665 | LRPPRC   | 1394 | 0 | 0 | 0 | 0 | 1   | 0 |
| ENSP00000260988 | CRYGB    | 175  | 0 | 0 | 0 | 0 | 1   | 0 |
| ENSP00000261443 | CSDE1    | 767  | 0 | 0 | 0 | 0 | 1   | 0 |
| ENSP00000261588 | KIAA0556 | 1618 | 0 | 0 | 0 | 0 | 1   | 0 |
| ENSP00000261643 | COX10    | 443  | 0 | 0 | 0 | 0 | 1   | 0 |
| ENSP00000261646 | SREBF1   | 1147 | 0 | 0 | 0 | 0 | 1   | 0 |
| ENSP00000261716 | TAOK1    | 1001 | 0 | 0 | 0 | 0 | 1   | 0 |
| ENSP00000262027 | MARS     | 900  | 0 | 0 | 0 | 0 | 2   | 0 |
| ENSP00000262346 | ANKRD13C | 506  | 0 | 0 | 0 | 0 | 1   | 2 |
| ENSP00000262445 | MAP2K4   | 399  | 0 | 0 | 0 | 0 | 1   | 0 |
| ENSP00000262577 | ZC3H3    | 948  | 0 | 0 | 0 | 0 | 1   | 0 |
| ENSP00000262605 | TTPAL    | 342  | 0 | 0 | 0 | 0 | 1   | 0 |
| ENSP00000262650 | ITCH     | 903  | 0 | 0 | 0 | 0 | 1   | 0 |
| ENSP00000262710 | ACIN1    | 1341 | 0 | 0 | 0 | 0 | 1   | 0 |
| ENSP00000262825 | CSF2RB   | 903  | 0 | 0 | 0 | 0 | 1   | 0 |
| ENSP00000262961 | ZFR2     | 939  | 0 | 0 | 0 | 0 | 1   | 0 |
| ENSP00000262963 | PTPRS    | 1928 | 0 | 0 | 0 | 0 | 1   | 0 |
| ENSP00000263269 | GRIN2D   | 1336 | 0 | 0 | 0 | 0 | 1   | 0 |
| ENSP00000263367 | HNRNPUL1 | 767  | 0 | 0 | 0 | 0 | 1   | 0 |
| ENSP00000263697 | DNAJC8   | 253  | 0 | 0 | 0 | 0 | 1   | 1 |
| ENSP00000263773 | FNBP4    | 1017 | 0 | 0 | 0 | 0 | 1   | 0 |
| ENSP00000263800 | LTK      | 864  | 0 | 0 | 0 | 0 | 1   | 0 |
| ENSP00000264028 | ARCN1    | 511  | 0 | 0 | 0 | 0 | 1   | 0 |
| ENSP00000264639 | PSMD3    | 534  | 0 | 0 | 0 | 0 | 1   | 0 |
| ENSP00000264832 | ICAM1    | 532  | 0 | 0 | 0 | 0 | 1   | 0 |
| ENSP00000264896 | SCARB2   | 478  | 0 | 0 | 0 | 0 | 1   | 0 |
| ENSP00000265245 | LSG1     | 658  | 0 | 0 | 0 | 0 | 1   | 0 |
| ENSP00000265388 | TNPO3    | 923  | 0 | 0 | 0 | 0 | 1   | 0 |
| ENSP00000265395 | HIBADH   | 336  | 0 | 0 | 0 | 0 | 1   | 0 |
| ENSP00000265529 | KIF9     | 790  | 0 | 0 | 0 | 0 | 1   | 0 |
| ENSP00000265602 | AHI1     | 1196 | 0 | 0 | 0 | 0 | 1   | 0 |
| ENSP00000266679 | CPSF6    | 588  | 0 | 0 | 0 | 0 | 1   | 1 |

|                 |          |      |   |   |   |   |    |     |
|-----------------|----------|------|---|---|---|---|----|-----|
| ENSP00000267119 | KRT71    | 523  | 0 | 0 | 0 | 0 | 1  | 0   |
| ENSP00000267803 | DUOXA1   | 483  | 0 | 0 | 0 | 0 | 1  | 0   |
| ENSP00000267884 | SRP14    | 136  | 0 | 0 | 0 | 0 | 1  | 1   |
| ENSP00000268057 | BBS4     | 519  | 0 | 0 | 0 | 0 | 1  | 0   |
| ENSP00000268082 | CCDC33   | 367  | 0 | 0 | 0 | 0 | 1  | 0   |
| ENSP00000269500 | FBXO15   | 434  | 0 | 0 | 0 | 0 | 1  | 0   |
| ENSP00000270747 | ARHGEF19 | 802  | 0 | 0 | 0 | 0 | 1  | 0   |
| ENSP00000271643 | ADAMTSL4 | 1074 | 0 | 0 | 0 | 0 | 1  | 0   |
| ENSP00000272317 | RPS27A   | 156  | 0 | 0 | 0 | 0 | 2  | 1   |
| ENSP00000273450 | ALDH1L1  | 912  | 0 | 0 | 0 | 0 | 1  | 0   |
| ENSP00000280333 | DOCK1    | 1865 | 0 | 0 | 0 | 0 | 1  | 0   |
| ENSP00000281268 | MUC15    | 311  | 0 | 0 | 0 | 0 | 1  | 0   |
| ENSP00000281416 | MFSD6    | 791  | 0 | 0 | 0 | 0 | 1  | 0   |
| ENSP00000281844 | RABGAP1L | 378  | 0 | 0 | 0 | 0 | 1  | 0   |
| ENSP00000286621 | ADK      | 362  | 0 | 0 | 0 | 0 | 1  | 0   |
| ENSP00000288602 | BRAF     | 766  | 0 | 0 | 0 | 0 | 1  | 0   |
| ENSP00000288828 | WIPI2    | 454  | 0 | 0 | 0 | 0 | 1  | 0   |
| ENSP00000289734 | ANK1     | 1880 | 0 | 0 | 0 | 0 | 1  | 0   |
| ENSP00000289893 | MACF1    | 5938 | 0 | 0 | 0 | 0 | 1  | 0   |
| ENSP00000290100 | EPB41    | 775  | 0 | 0 | 0 | 0 | 1  | 0   |
| ENSP00000290607 | STARD9   | 4700 | 0 | 0 | 0 | 0 | 1  | 1   |
| ENSP00000291552 | U2AF1    | 240  | 0 | 0 | 0 | 0 | 1  | 0   |
| ENSP00000292432 | HK3      | 923  | 0 | 0 | 0 | 0 | 1  | 0   |
| ENSP00000293525 | KRT86    | 486  | 0 | 0 | 0 | 0 | 20 | 10  |
| ENSP00000293670 | KRT83    | 493  | 0 | 0 | 0 | 0 | 6  | 3   |
| ENSP00000295920 | GMPS     | 594  | 0 | 0 | 0 | 0 | 2  | 0   |
| ENSP00000296701 | FBXO38   | 943  | 0 | 0 | 0 | 0 | 1  | 0   |
| ENSP00000296862 | GPR111   | 708  | 0 | 0 | 0 | 0 | 1  | 0   |
| ENSP00000296953 | CREBRF   | 639  | 0 | 0 | 0 | 0 | 1  | 0   |
| ENSP00000297142 | NEUROD6  | 337  | 0 | 0 | 0 | 0 | 1  | 0   |
| ENSP00000297261 | SHH      | 462  | 0 | 0 | 0 | 0 | 1  | 0   |
| ENSP00000297591 | KIAA1429 | 1812 | 0 | 0 | 0 | 0 | 1  | 0   |
| ENSP00000297875 | SYTL5    | 730  | 0 | 0 | 0 | 0 | 1  | 0   |
| ENSP00000298249 | REEP3    | 240  | 0 | 0 | 0 | 0 | 1  | 0   |
| ENSP00000298912 | CLMN     | 1002 | 0 | 0 | 0 | 0 | 1  | 0   |
| ENSP00000298919 | PDZRN4   | 776  | 0 | 0 | 0 | 0 | 1  | 0   |
| ENSP00000299980 | AP1G1    | 822  | 0 | 0 | 0 | 0 | 1  | 0   |
| ENSP00000300131 | NAB2     | 525  | 0 | 0 | 0 | 0 | 1  | 0   |
| ENSP00000300456 | SLC27A4  | 643  | 0 | 0 | 0 | 0 | 1  | 0   |
| ENSP00000301764 | DDB1     | 1140 | 0 | 0 | 0 | 0 | 2  | 1   |
| ENSP00000302895 | ARAP2    | 1704 | 0 | 0 | 0 | 0 | 1  | 0   |
| ENSP00000303192 | RGL1     | 803  | 0 | 0 | 0 | 0 | 1  | 0   |
| ENSP00000303315 | JUNB     | 347  | 0 | 0 | 0 | 0 | 1  | 0   |
| ENSP00000303507 | BCR      | 1271 | 0 | 0 | 0 | 0 | 1  | 0   |
| ENSP00000303908 | TWF2     | 349  | 0 | 0 | 0 | 0 | 1  | 0   |
| ENSP00000304350 | PRPF8    | 2335 | 0 | 0 | 0 | 0 | 1  | 0   |
| ENSP00000304355 | CCDC126  | 140  | 0 | 0 | 0 | 0 | 1  | 0   |
| ENSP00000304769 | ZNF467   | 595  | 0 | 0 | 0 | 0 | 1  | 0   |
| ENSP00000306299 | FAM117B  | 345  | 0 | 0 | 0 | 0 | 1  | 0   |
| ENSP00000307078 | KIF5B    | 963  | 0 | 0 | 0 | 0 | 2  | 1.5 |
| ENSP00000310585 | PCP2     | 136  | 0 | 0 | 0 | 0 | 1  | 0   |
| ENSP00000311847 | CARHSP1  | 147  | 0 | 0 | 0 | 0 | 1  | 1   |
| ENSP00000312734 | RAB8B    | 207  | 0 | 0 | 0 | 0 | 1  | 0   |
| ENSP00000313995 | KLHDC3   | 382  | 0 | 0 | 0 | 0 | 1  | 0   |
| ENSP00000314075 | AKAP1    | 593  | 0 | 0 | 0 | 0 | 1  | 0   |
| ENSP00000314787 | ARHGEF2  | 985  | 0 | 0 | 0 | 0 | 1  | 1   |
| ENSP00000315325 | ARHGEF2  | 958  | 0 | 0 | 0 | 0 | 1  | 1   |
| ENSP00000316042 | HNRNPA0  | 305  | 0 | 0 | 0 | 0 | 1  | 1   |

|                 |           |      |   |   |   |   |     |   |
|-----------------|-----------|------|---|---|---|---|-----|---|
| ENSP00000316460 | FYB       | 783  | 0 | 0 | 0 | 0 | 1   | 0 |
| ENSP00000317606 | PSAT1     | 324  | 0 | 0 | 0 | 0 | 1   | 2 |
| ENSP00000318016 | KIAA0196  | 1159 | 0 | 0 | 0 | 0 | 1   | 0 |
| ENSP00000321116 | PNPLA1    | 446  | 0 | 0 | 0 | 0 | 1   | 0 |
| ENSP00000321729 | OR51V1    | 321  | 0 | 0 | 0 | 0 | 1   | 0 |
| ENSP00000321845 | SEC24C    | 1094 | 0 | 0 | 0 | 0 | 1   | 0 |
| ENSP00000321987 | TSPEAR    | 669  | 0 | 0 | 0 | 0 | 1   | 0 |
| ENSP00000322478 | AHI1      | 1053 | 0 | 0 | 0 | 0 | 1   | 0 |
| ENSP00000322609 | C1orf173  | 1530 | 0 | 0 | 0 | 0 | 1   | 0 |
| ENSP00000323377 | EXOC3     | 745  | 0 | 0 | 0 | 0 | 1   | 0 |
| ENSP00000324578 | ETS1      | 441  | 0 | 0 | 0 | 0 | 1   | 0 |
| ENSP00000324740 | YES1      | 543  | 0 | 0 | 0 | 0 | 1   | 0 |
| ENSP00000325240 | LASP1     | 261  | 0 | 0 | 0 | 0 | 1   | 0 |
| ENSP00000326199 | INADL     | 1582 | 0 | 0 | 0 | 0 | 1   | 0 |
| ENSP00000327349 | TMCC1     | 474  | 0 | 0 | 0 | 0 | 1   | 0 |
| ENSP00000327732 | C7orf61   | 206  | 0 | 0 | 0 | 0 | 1   | 0 |
| ENSP00000328800 | WBP2NL    | 309  | 0 | 0 | 0 | 0 | 0.5 | 0 |
| ENSP00000329165 | KRT36     | 467  | 0 | 0 | 0 | 0 | 2   | 2 |
| ENSP00000329896 | FAM120C   | 895  | 0 | 0 | 0 | 0 | 1   | 0 |
| ENSP00000330696 | P2RX7     | 425  | 0 | 0 | 0 | 0 | 1   | 0 |
| ENSP00000330720 | KRTAP11-1 | 163  | 0 | 0 | 0 | 0 | 1   | 0 |
| ENSP00000331019 | RPS27L    | 84   | 0 | 0 | 0 | 0 | 1   | 0 |
| ENSP00000333229 | APOL4     | 347  | 0 | 0 | 0 | 0 | 1   | 0 |
| ENSP00000333504 | HNRNPA1   | 307  | 0 | 0 | 0 | 0 | 1   | 0 |
| ENSP00000334767 | CCDC84    | 332  | 0 | 0 | 0 | 0 | 1   | 0 |
| ENSP00000334879 | SOWAHB    | 793  | 0 | 0 | 0 | 0 | 1   | 0 |
| ENSP00000335557 | SLX4IP    | 408  | 0 | 0 | 0 | 0 | 1   | 0 |
| ENSP00000336719 | ZNF226    | 803  | 0 | 0 | 0 | 0 | 1   | 0 |
| ENSP00000337168 | EPB41L1   | 881  | 0 | 0 | 0 | 0 | 1   | 0 |
| ENSP00000337446 | STARD3    | 445  | 0 | 0 | 0 | 0 | 2   | 0 |
| ENSP00000338260 | APOL4     | 350  | 0 | 0 | 0 | 0 | 1   | 0 |
| ENSP00000338477 | HNRNPF    | 415  | 0 | 0 | 0 | 0 | 1   | 0 |
| ENSP00000338481 | EPB41L2   | 1005 | 0 | 0 | 0 | 0 | 1   | 1 |
| ENSP00000339913 | CXCL12    | 89   | 0 | 0 | 0 | 0 | 1   | 0 |
| ENSP00000340079 | RAB28     | 204  | 0 | 0 | 0 | 0 | 0.5 | 0 |
| ENSP00000340689 | GLS       | 598  | 0 | 0 | 0 | 0 | 1   | 0 |
| ENSP00000340797 | TRIM3     | 744  | 0 | 0 | 0 | 0 | 1   | 0 |
| ENSP00000341285 | HNRNPA1L2 | 320  | 0 | 0 | 0 | 0 | 1   | 0 |
| ENSP00000341730 | RPL10     | 214  | 0 | 0 | 0 | 0 | 1   | 0 |
| ENSP00000342665 | WWP1      | 704  | 0 | 0 | 0 | 0 | 1   | 0 |
| ENSP00000343041 | METTL17   | 456  | 0 | 0 | 0 | 0 | 1   | 1 |
| ENSP00000343446 | MASTL     | 840  | 0 | 0 | 0 | 0 | 1   | 0 |
| ENSP00000343646 | RBL1      | 1014 | 0 | 0 | 0 | 0 | 1   | 0 |
| ENSP00000344832 | CAP1      | 474  | 0 | 0 | 0 | 0 | 1   | 0 |
| ENSP00000345156 | RPL14     | 215  | 0 | 0 | 0 | 0 | 1   | 0 |
| ENSP00000345259 | EPB41     | 864  | 0 | 0 | 0 | 0 | 1   | 0 |
| ENSP00000345530 | NEDD4     | 1247 | 0 | 0 | 0 | 0 | 1   | 0 |
| ENSP00000345822 | SREBF1    | 1071 | 0 | 0 | 0 | 0 | 1   | 0 |
| ENSP00000346265 | SYT5      | 386  | 0 | 0 | 0 | 0 | 1   | 3 |
| ENSP00000346294 | S100A4    | 101  | 0 | 0 | 0 | 0 | 1   | 0 |
| ENSP00000346516 | KMT2A     | 3931 | 0 | 0 | 0 | 0 | 1   | 0 |
| ENSP00000347293 | LTK       | 803  | 0 | 0 | 0 | 0 | 1   | 0 |
| ENSP00000347648 | ZNF512    | 567  | 0 | 0 | 0 | 0 | 1   | 0 |
| ENSP00000347767 | NEK5      | 708  | 0 | 0 | 0 | 0 | 1   | 0 |
| ENSP00000347792 | SYNJ2     | 1496 | 0 | 0 | 0 | 0 | 1   | 2 |
| ENSP00000348349 | MYO9A     | 2548 | 0 | 0 | 0 | 0 | 2   | 0 |
| ENSP00000349545 | OSBPL1A   | 568  | 0 | 0 | 0 | 0 | 1   | 0 |
| ENSP00000349863 | SRPK2     | 688  | 0 | 0 | 0 | 0 | 1   | 1 |

|                 |          |      |   |   |   |   |   |   |
|-----------------|----------|------|---|---|---|---|---|---|
| ENSP00000350219 | IPO5     | 1097 | 0 | 0 | 0 | 0 | 1 | 1 |
| ENSP00000350657 | SYTL5    | 730  | 0 | 0 | 0 | 0 | 1 | 0 |
| ENSP00000351329 | CSDE1    | 798  | 0 | 0 | 0 | 0 | 1 | 0 |
| ENSP00000351524 | HELZ     | 1942 | 0 | 0 | 0 | 0 | 1 | 0 |
| ENSP00000351539 | ZBTB18   | 531  | 0 | 0 | 0 | 0 | 1 | 0 |
| ENSP00000352535 | BCR      | 1227 | 0 | 0 | 0 | 0 | 1 | 0 |
| ENSP00000354125 | EIF3B    | 814  | 0 | 0 | 0 | 0 | 2 | 0 |
| ENSP00000354271 | STRBP    | 658  | 0 | 0 | 0 | 0 | 1 | 0 |
| ENSP00000354482 | SP8      | 490  | 0 | 0 | 0 | 0 | 1 | 0 |
| ENSP00000354837 | ARHGEF2  | 986  | 0 | 0 | 0 | 0 | 1 | 1 |
| ENSP00000354957 | SMC5     | 1101 | 0 | 0 | 0 | 0 | 1 | 0 |
| ENSP00000355185 | DCLRE1A  | 1040 | 0 | 0 | 0 | 0 | 1 | 0 |
| ENSP00000355518 | FH       | 510  | 0 | 0 | 0 | 0 | 1 | 0 |
| ENSP00000355568 | IRF2BP2  | 587  | 0 | 0 | 0 | 0 | 1 | 0 |
| ENSP00000356071 | SERAC1   | 654  | 0 | 0 | 0 | 0 | 1 | 0 |
| ENSP00000356661 | RABGAP1L | 253  | 0 | 0 | 0 | 0 | 1 | 0 |
| ENSP00000357075 | TAGLN2   | 199  | 0 | 0 | 0 | 0 | 1 | 0 |
| ENSP00000357077 | TAGLN2   | 199  | 0 | 0 | 0 | 0 | 1 | 0 |
| ENSP00000357219 | TTC24    | 582  | 0 | 0 | 0 | 0 | 1 | 0 |
| ENSP00000357220 | TTC24    | 582  | 0 | 0 | 0 | 0 | 1 | 0 |
| ENSP00000357703 | S100A4   | 101  | 0 | 0 | 0 | 0 | 1 | 0 |
| ENSP00000358079 | INPP5F   | 375  | 0 | 0 | 0 | 0 | 1 | 0 |
| ENSP00000358777 | ATP6AP1  | 470  | 0 | 0 | 0 | 0 | 1 | 0 |
| ENSP00000358810 | STRIP1   | 837  | 0 | 0 | 0 | 0 | 1 | 0 |
| ENSP00000358811 | STRIP1   | 742  | 0 | 0 | 0 | 0 | 1 | 0 |
| ENSP00000358844 | GSTM2    | 193  | 0 | 0 | 0 | 0 | 1 | 0 |
| ENSP00000360021 | GNG12    | 72   | 0 | 0 | 0 | 0 | 1 | 0 |
| ENSP00000360200 | INADL    | 1801 | 0 | 0 | 0 | 0 | 1 | 0 |
| ENSP00000360776 | B4GALT5  | 388  | 0 | 0 | 0 | 0 | 1 | 0 |
| ENSP00000360887 | WDR44    | 824  | 0 | 0 | 0 | 0 | 1 | 0 |
| ENSP00000361281 | BEST4    | 473  | 0 | 0 | 0 | 0 | 1 | 0 |
| ENSP00000361408 | ZCCHC24  | 228  | 0 | 0 | 0 | 0 | 1 | 1 |
| ENSP00000361496 | PRPS1    | 168  | 0 | 0 | 0 | 0 | 1 | 0 |
| ENSP00000361819 | ADK      | 345  | 0 | 0 | 0 | 0 | 1 | 0 |
| ENSP00000361878 | CAP1     | 475  | 0 | 0 | 0 | 0 | 1 | 1 |
| ENSP00000362333 | SAR1A    | 121  | 0 | 0 | 0 | 0 | 1 | 0 |
| ENSP00000362336 | SAR1A    | 50   | 0 | 0 | 0 | 0 | 1 | 0 |
| ENSP00000362931 | SRPK1    | 655  | 0 | 0 | 0 | 0 | 1 | 1 |
| ENSP00000363551 | CXCL12   | 93   | 0 | 0 | 0 | 0 | 1 | 0 |
| ENSP00000364162 | TRO      | 706  | 0 | 0 | 0 | 0 | 1 | 0 |
| ENSP00000364517 | IQSEC2   | 1478 | 0 | 0 | 0 | 0 | 1 | 0 |
| ENSP00000364649 | SDHB     | 280  | 0 | 0 | 0 | 0 | 1 | 0 |
| ENSP00000364801 | HSPA1B   | 641  | 0 | 0 | 0 | 0 | 3 | 0 |
| ENSP00000365309 | ABI1     | 476  | 0 | 0 | 0 | 0 | 1 | 0 |
| ENSP00000365634 | KIAA1217 | 1465 | 0 | 0 | 0 | 0 | 1 | 0 |
| ENSP00000366783 | HECTD4   | 4246 | 0 | 0 | 0 | 0 | 1 | 0 |
| ENSP00000366857 | DZANK1   | 247  | 0 | 0 | 0 | 0 | 1 | 0 |
| ENSP00000367001 | DPP6     | 865  | 0 | 0 | 0 | 0 | 1 | 0 |
| ENSP00000367460 | HNRNPUL1 | 752  | 0 | 0 | 0 | 0 | 1 | 0 |
| ENSP00000367894 | PRRG1    | 218  | 0 | 0 | 0 | 0 | 1 | 0 |
| ENSP00000368646 | PRDX4    | 271  | 0 | 0 | 0 | 0 | 1 | 0 |
| ENSP00000369117 | AMHR2    | 478  | 0 | 0 | 0 | 0 | 1 | 0 |
| ENSP00000369136 | NWD1     | 1432 | 0 | 0 | 0 | 0 | 1 | 0 |
| ENSP00000369349 | KRT81    | 505  | 0 | 0 | 0 | 0 | 2 | 1 |
| ENSP00000369456 | ITPA     | 194  | 0 | 0 | 0 | 0 | 1 | 2 |
| ENSP00000369757 | RPS6     | 249  | 0 | 0 | 0 | 0 | 1 | 0 |
| ENSP00000369979 | CPXM1    | 734  | 0 | 0 | 0 | 0 | 1 | 3 |
| ENSP00000370569 | RPL21    | 160  | 0 | 0 | 0 | 0 | 1 | 0 |



|                 |          |      |   |   |   |   |   |   |
|-----------------|----------|------|---|---|---|---|---|---|
| ENSP00000370745 | DDX1     | 740  | 0 | 0 | 0 | 0 | 2 | 0 |
| ENSP00000371046 | DDX17    | 652  | 0 | 0 | 0 | 0 | 1 | 0 |
| ENSP00000371099 | EIF3L    | 516  | 0 | 0 | 0 | 0 | 1 | 0 |
| ENSP00000371243 | TEX33    | 280  | 0 | 0 | 0 | 0 | 1 | 0 |
| ENSP00000372445 | METTL17  | 478  | 0 | 0 | 0 | 0 | 1 | 1 |
| ENSP00000372689 | STAG1    | 1258 | 0 | 0 | 0 | 0 | 1 | 0 |
| ENSP00000373657 | C17orf85 | 620  | 0 | 0 | 0 | 0 | 1 | 0 |
| ENSP00000374574 | DDX42    | 938  | 0 | 0 | 0 | 0 | 1 | 0 |
| ENSP00000374630 | SPTBN1   | 690  | 0 | 0 | 0 | 0 | 1 | 0 |
| ENSP00000375730 | RPL13A   | 203  | 0 | 0 | 0 | 0 | 1 | 0 |
| ENSP00000376071 | FAM117B  | 589  | 0 | 0 | 0 | 0 | 1 | 0 |
| ENSP00000376371 | SLC25A12 | 571  | 0 | 0 | 0 | 0 | 1 | 0 |
| ENSP00000376436 | ETS1     | 485  | 0 | 0 | 0 | 0 | 1 | 0 |
| ENSP00000377219 | DNM1     | 851  | 0 | 0 | 0 | 0 | 3 | 0 |
| ENSP00000377500 | PHLDB2   | 1237 | 0 | 0 | 0 | 0 | 1 | 1 |
| ENSP00000377548 | RBM14    | 156  | 0 | 0 | 0 | 0 | 1 | 0 |
| ENSP00000377555 | KRT36    | 417  | 0 | 0 | 0 | 0 | 1 | 1 |
| ENSP00000377558 | KRT35    | 455  | 0 | 0 | 0 | 0 | 2 | 0 |
| ENSP00000377934 | KIF7     | 1343 | 0 | 0 | 0 | 0 | 1 | 0 |
| ENSP00000378341 | PRKCE    | 219  | 0 | 0 | 0 | 0 | 1 | 0 |
| ENSP00000378577 | CLDN3    | 220  | 0 | 0 | 0 | 0 | 1 | 0 |
| ENSP00000379029 | KIF21A   | 1675 | 0 | 0 | 0 | 0 | 1 | 0 |
| ENSP00000379042 | ERO1L    | 468  | 0 | 0 | 0 | 0 | 1 | 0 |
| ENSP00000379147 | VAPB     | 99   | 0 | 0 | 0 | 0 | 1 | 1 |
| ENSP00000379712 | IQSEC2   | 1488 | 0 | 0 | 0 | 0 | 1 | 0 |
| ENSP00000379801 | AMPD3    | 767  | 0 | 0 | 0 | 0 | 1 | 1 |
| ENSP00000379946 | GLTSCR1  | 1560 | 0 | 0 | 0 | 0 | 1 | 0 |
| ENSP00000380206 | EIF3B    | 814  | 0 | 0 | 0 | 0 | 2 | 0 |
| ENSP00000380373 | JADE3    | 823  | 0 | 0 | 0 | 0 | 1 | 0 |
| ENSP00000380560 | KIF5C    | 725  | 0 | 0 | 0 | 0 | 2 | 1 |
| ENSP00000380727 | TMEM213  | 106  | 0 | 0 | 0 | 0 | 1 | 0 |
| ENSP00000381247 | EFCAB9   | 197  | 0 | 0 | 0 | 0 | 1 | 0 |
| ENSP00000381494 | KRTAP2-2 | 123  | 0 | 0 | 0 | 0 | 1 | 1 |
| ENSP00000381727 | GPR111   | 642  | 0 | 0 | 0 | 0 | 1 | 0 |
| ENSP00000381992 | SEPT7    | 438  | 0 | 0 | 0 | 0 | 2 | 0 |
| ENSP00000383086 | CSNK2A1  | 385  | 0 | 0 | 0 | 0 | 1 | 2 |
| ENSP00000383115 | COLEC12  | 742  | 0 | 0 | 0 | 0 | 1 | 0 |
| ENSP00000383159 | PCBP3    | 361  | 0 | 0 | 0 | 0 | 1 | 0 |
| ENSP00000383163 | PCBP3    | 345  | 0 | 0 | 0 | 0 | 1 | 0 |
| ENSP00000383234 | MAPK4    | 587  | 0 | 0 | 0 | 0 | 1 | 0 |
| ENSP00000383279 | UMODL1   | 1374 | 0 | 0 | 0 | 0 | 1 | 0 |
| ENSP00000383444 | XPO4     | 1151 | 0 | 0 | 0 | 0 | 1 | 1 |
| ENSP00000383915 | MAPRE3   | 266  | 0 | 0 | 0 | 0 | 1 | 0 |
| ENSP00000384296 | ACY1     | 408  | 0 | 0 | 0 | 0 | 1 | 0 |
| ENSP00000384672 | MBD5     | 1727 | 0 | 0 | 0 | 0 | 1 | 0 |
| ENSP00000384774 | HK1      | 921  | 0 | 0 | 0 | 0 | 1 | 0 |
| ENSP00000385276 | TENM3    | 2699 | 0 | 0 | 0 | 0 | 1 | 0 |
| ENSP00000385715 | MAPRE3   | 266  | 0 | 0 | 0 | 0 | 1 | 0 |
| ENSP00000386049 | MBD5     | 1494 | 0 | 0 | 0 | 0 | 1 | 0 |
| ENSP00000386147 | UMODL1   | 1318 | 0 | 0 | 0 | 0 | 1 | 0 |
| ENSP00000386229 | RGS14    | 566  | 0 | 0 | 0 | 0 | 1 | 0 |
| ENSP00000386355 | CCDC126  | 140  | 0 | 0 | 0 | 0 | 1 | 0 |
| ENSP00000386522 | DYNC1I2  | 630  | 0 | 0 | 0 | 0 | 1 | 0 |
| ENSP00000386672 | RAB1A    | 173  | 0 | 0 | 0 | 0 | 2 | 3 |
| ENSP00000386794 | ARHGEF4  | 1014 | 0 | 0 | 0 | 0 | 1 | 0 |
| ENSP00000386883 | CNRIP1   | 128  | 0 | 0 | 0 | 0 | 1 | 1 |
| ENSP00000387691 | HSPA1L   | 641  | 0 | 0 | 0 | 0 | 1 | 0 |
| ENSP00000388082 | CNTRF    | 256  | 0 | 0 | 0 | 0 | 1 | 0 |

|                 |          |      |   |   |   |   |     |   |
|-----------------|----------|------|---|---|---|---|-----|---|
| ENSP00000388975 | RALA     | 101  | 0 | 0 | 0 | 0 | 1   | 0 |
| ENSP00000389441 | UGGT1    | 131  | 0 | 0 | 0 | 0 | 1   | 0 |
| ENSP00000389598 | WBP2NL   | 273  | 0 | 0 | 0 | 0 | 0.5 | 0 |
| ENSP00000389640 | SLC39A10 | 126  | 0 | 0 | 0 | 0 | 0.5 | 0 |
| ENSP00000390020 | HLA-DOB  | 273  | 0 | 0 | 0 | 0 | 1   | 0 |
| ENSP00000390121 | DDX42    | 938  | 0 | 0 | 0 | 0 | 1   | 0 |
| ENSP00000390265 | IDH1     | 414  | 0 | 0 | 0 | 0 | 1   | 0 |
| ENSP00000390715 | PPP1CB   | 169  | 0 | 0 | 0 | 0 | 1   | 0 |
| ENSP00000391211 | PSMC2    | 433  | 0 | 0 | 0 | 0 | 1   | 0 |
| ENSP00000391446 | RPL14    | 124  | 0 | 0 | 0 | 0 | 1   | 0 |
| ENSP00000391868 | PNPLA1   | 533  | 0 | 0 | 0 | 0 | 1   | 0 |
| ENSP00000393081 | NSUN5    | 391  | 0 | 0 | 0 | 0 | 1   | 0 |
| ENSP00000393087 | HSPA1B   | 641  | 0 | 0 | 0 | 0 | 0.5 | 0 |
| ENSP00000393265 | ZNF226   | 803  | 0 | 0 | 0 | 0 | 1   | 0 |
| ENSP00000393553 | PTPRA    | 813  | 0 | 0 | 0 | 0 | 1   | 0 |
| ENSP00000394170 | AP3S2    | 124  | 0 | 0 | 0 | 0 | 1   | 0 |
| ENSP00000394290 | GNL1     | 607  | 0 | 0 | 0 | 0 | 1   | 0 |
| ENSP00000394580 | COMMD3   | 163  | 0 | 0 | 0 | 0 | 1   | 0 |
| ENSP00000395438 | AP2M1    | 252  | 0 | 0 | 0 | 0 | 1   | 3 |
| ENSP00000395881 | ALDH1L1  | 801  | 0 | 0 | 0 | 0 | 3   | 0 |
| ENSP00000396000 | AMPD3    | 608  | 0 | 0 | 0 | 0 | 1   | 1 |
| ENSP00000396273 | EHD1     | 162  | 0 | 0 | 0 | 0 | 3   | 0 |
| ENSP00000398390 | KIAA1429 | 1147 | 0 | 0 | 0 | 0 | 1   | 0 |
| ENSP00000399162 | MYO9A    | 2619 | 0 | 0 | 0 | 0 | 1   | 0 |
| ENSP00000400048 | VPS29    | 87   | 0 | 0 | 0 | 0 | 1   | 0 |
| ENSP00000400330 | PSMD2    | 203  | 0 | 0 | 0 | 0 | 1   | 0 |
| ENSP00000400376 | ERAP2    | 960  | 0 | 0 | 0 | 0 | 1   | 0 |
| ENSP00000400433 | HNRNPF   | 415  | 0 | 0 | 0 | 0 | 1   | 0 |
| ENSP00000400625 | DHTKD1   | 160  | 0 | 0 | 0 | 0 | 1   | 0 |
| ENSP00000400766 | DDX17    | 181  | 0 | 0 | 0 | 0 | 1   | 0 |
| ENSP00000400855 | DMXL2    | 2400 | 0 | 0 | 0 | 0 | 1   | 1 |
| ENSP00000401328 | PRSS48   | 328  | 0 | 0 | 0 | 0 | 1   | 1 |
| ENSP00000402041 | EPB41L2  | 747  | 0 | 0 | 0 | 0 | 1   | 0 |
| ENSP00000402913 | SEC24C   | 975  | 0 | 0 | 0 | 0 | 1   | 0 |
| ENSP00000403448 | NIPSNAP1 | 69   | 0 | 0 | 0 | 0 | 1   | 0 |
| ENSP00000403637 | LRPPRC   | 359  | 0 | 0 | 0 | 0 | 1   | 0 |
| ENSP00000404269 | SUSD1    | 281  | 0 | 0 | 0 | 0 | 1   | 0 |
| ENSP00000404379 | HECTD4   | 3996 | 0 | 0 | 0 | 0 | 1   | 0 |
| ENSP00000405012 | WDR87    | 2912 | 0 | 0 | 0 | 0 | 1   | 0 |
| ENSP00000405354 | MOB4     | 204  | 0 | 0 | 0 | 0 | 1   | 0 |
| ENSP00000406640 | TEX33    | 139  | 0 | 0 | 0 | 0 | 1   | 0 |
| ENSP00000406656 | WDR64    | 685  | 0 | 0 | 0 | 0 | 1   | 0 |
| ENSP00000407919 | NARS     | 299  | 0 | 0 | 0 | 0 | 1   | 0 |
| ENSP00000408264 | LSG1     | 285  | 0 | 0 | 0 | 0 | 1   | 0 |
| ENSP00000410402 | MAP2K4   | 410  | 0 | 0 | 0 | 0 | 1   | 0 |
| ENSP00000410728 | HNRNPU   | 241  | 0 | 0 | 0 | 0 | 1   | 0 |
| ENSP00000410833 | GBE1     | 702  | 0 | 0 | 0 | 0 | 1   | 0 |
| ENSP00000411308 | CTDSP1   | 195  | 0 | 0 | 0 | 0 | 1   | 0 |
| ENSP00000411904 | CPNE4    | 557  | 0 | 0 | 0 | 0 | 1   | 0 |
| ENSP00000412720 | TTPAL    | 279  | 0 | 0 | 0 | 0 | 1   | 0 |
| ENSP00000413282 | ITPA     | 177  | 0 | 0 | 0 | 0 | 1   | 1 |
| ENSP00000413298 | COPS3    | 345  | 0 | 0 | 0 | 0 | 1   | 0 |
| ENSP00000413736 | PRDX4    | 161  | 0 | 0 | 0 | 0 | 1   | 0 |
| ENSP00000414650 | RBM14    | 129  | 0 | 0 | 0 | 0 | 1   | 0 |
| ENSP00000414803 | LASP1    | 91   | 0 | 0 | 0 | 0 | 1   | 1 |
| ENSP00000414909 | C1orf167 | 1473 | 0 | 0 | 0 | 0 | 1   | 0 |
| ENSP00000415256 | TSPAN2   | 187  | 0 | 0 | 0 | 0 | 1   | 0 |
| ENSP00000416832 | CCT8     | 323  | 0 | 0 | 0 | 0 | 2   | 0 |

|                 |             |      |   |   |   |   |   |   |
|-----------------|-------------|------|---|---|---|---|---|---|
| ENSP00000417056 | ACY1        | 373  | 0 | 0 | 0 | 0 | 1 | 0 |
| ENSP00000417279 | CACNA2D3    | 997  | 0 | 0 | 0 | 0 | 1 | 0 |
| ENSP00000417497 | PHLDB2      | 519  | 0 | 0 | 0 | 0 | 1 | 1 |
| ENSP00000417614 | CAMKV       | 434  | 0 | 0 | 0 | 0 | 1 | 0 |
| ENSP00000417967 | TBRG4       | 118  | 0 | 0 | 0 | 0 | 1 | 0 |
| ENSP00000418228 | CACNA2D3    | 519  | 0 | 0 | 0 | 0 | 1 | 3 |
| ENSP00000418447 | PPP2CA      | 309  | 0 | 0 | 0 | 0 | 1 | 0 |
| ENSP00000419101 | CACNA2D3    | 1091 | 0 | 0 | 0 | 0 | 1 | 0 |
| ENSP00000419526 | RAB6B       | 83   | 0 | 0 | 0 | 0 | 1 | 1 |
| ENSP00000419638 | GBE1        | 661  | 0 | 0 | 0 | 0 | 1 | 0 |
| ENSP00000420353 | PRRG1       | 114  | 0 | 0 | 0 | 0 | 1 | 0 |
| ENSP00000421011 | ANK2        | 1611 | 0 | 0 | 0 | 0 | 1 | 0 |
| ENSP00000421175 | ERAP2       | 694  | 0 | 0 | 0 | 0 | 1 | 0 |
| ENSP00000421320 | TENM3       | 170  | 0 | 0 | 0 | 0 | 1 | 0 |
| ENSP00000421678 | CCSER1      | 70   | 0 | 0 | 0 | 0 | 1 | 0 |
| ENSP00000422188 | TTC23L      | 361  | 0 | 0 | 0 | 0 | 1 | 0 |
| ENSP00000422329 | RGS14       | 437  | 0 | 0 | 0 | 0 | 1 | 0 |
| ENSP00000422455 | NEDD4       | 910  | 0 | 0 | 0 | 0 | 1 | 0 |
| ENSP00000423828 | APC         | 1304 | 0 | 0 | 0 | 0 | 1 | 1 |
| ENSP00000424595 | PRPS1L1     | 318  | 0 | 0 | 0 | 0 | 1 | 0 |
| ENSP00000424827 | NEDD4       | 1319 | 0 | 0 | 0 | 0 | 1 | 0 |
| ENSP00000424853 | CPNE4       | 575  | 0 | 0 | 0 | 0 | 1 | 0 |
| ENSP00000425242 | TTC23L      | 287  | 0 | 0 | 0 | 0 | 1 | 0 |
| ENSP00000425367 | SAR1B       | 144  | 0 | 0 | 0 | 0 | 1 | 0 |
| ENSP00000426312 | MAP1B       | 122  | 0 | 0 | 0 | 0 | 1 | 0 |
| ENSP00000426344 | SEPT11      | 425  | 0 | 0 | 0 | 0 | 1 | 0 |
| ENSP00000426410 | FBXO38      | 943  | 0 | 0 | 0 | 0 | 1 | 0 |
| ENSP00000426586 | UBE2D3      | 118  | 0 | 0 | 0 | 0 | 1 | 0 |
| ENSP00000426597 | FYB         | 174  | 0 | 0 | 0 | 0 | 1 | 0 |
| ENSP00000426923 | CCT5        | 486  | 0 | 0 | 0 | 0 | 1 | 1 |
| ENSP00000428955 | NWD1        | 1358 | 0 | 0 | 0 | 0 | 1 | 0 |
| ENSP00000429255 | NCALD       | 136  | 0 | 0 | 0 | 0 | 1 | 0 |
| ENSP00000429676 | KIAA0196    | 1011 | 0 | 0 | 0 | 0 | 1 | 0 |
| ENSP00000430555 | PPP3CC      | 134  | 0 | 0 | 0 | 0 | 1 | 0 |
| ENSP00000431229 | ERCC2       | 405  | 0 | 0 | 0 | 0 | 1 | 0 |
| ENSP00000431983 | MUC15       | 361  | 0 | 0 | 0 | 0 | 1 | 0 |
| ENSP00000434585 | NPEPPS      | 163  | 0 | 0 | 0 | 0 | 1 | 0 |
| ENSP00000434682 | GDA         | 176  | 0 | 0 | 0 | 0 | 1 | 0 |
| ENSP00000435199 | NDUFV1      | 133  | 0 | 0 | 0 | 0 | 1 | 0 |
| ENSP00000435481 | AP003068.23 | 252  | 0 | 0 | 0 | 0 | 1 | 0 |
| ENSP00000436971 | RPS3        | 243  | 0 | 0 | 0 | 0 | 1 | 0 |
| ENSP00000437164 | AMPD2       | 761  | 0 | 0 | 0 | 0 | 1 | 0 |
| ENSP00000437213 | HLA-DOB     | 154  | 0 | 0 | 0 | 0 | 1 | 0 |
| ENSP00000438061 | HNRNPF      | 415  | 0 | 0 | 0 | 0 | 1 | 0 |
| ENSP00000438247 | PCMT1       | 192  | 0 | 0 | 0 | 0 | 1 | 1 |
| ENSP00000438819 | TAOK1       | 853  | 0 | 0 | 0 | 0 | 1 | 0 |
| ENSP00000439869 | STARD3      | 445  | 0 | 0 | 0 | 0 | 2 | 0 |
| ENSP00000439990 | PDZRN4      | 778  | 0 | 0 | 0 | 0 | 1 | 0 |
| ENSP00000440240 | KRT85       | 295  | 0 | 0 | 0 | 0 | 1 | 0 |
| ENSP00000440660 | DDB1        | 109  | 0 | 0 | 0 | 0 | 1 | 0 |
| ENSP00000441006 | GLI1        | 1065 | 0 | 0 | 0 | 0 | 1 | 0 |
| ENSP00000441345 | TCP1        | 221  | 0 | 0 | 0 | 0 | 1 | 1 |
| ENSP00000441858 | DMXL2       | 3037 | 0 | 0 | 0 | 0 | 2 | 1 |
| ENSP00000441887 | NCAM2       | 424  | 0 | 0 | 0 | 0 | 1 | 0 |
| ENSP00000442461 | NPEPPS      | 839  | 0 | 0 | 0 | 0 | 1 | 1 |
| ENSP00000442508 | PSMD3       | 356  | 0 | 0 | 0 | 0 | 1 | 0 |
| ENSP00000443139 | AKAP1       | 903  | 0 | 0 | 0 | 0 | 1 | 0 |
| ENSP00000443821 | OGDH        | 974  | 0 | 0 | 0 | 0 | 1 | 0 |

|                 |             |      |   |   |   |   |   |   |
|-----------------|-------------|------|---|---|---|---|---|---|
| ENSP00000443831 | REEP1       | 180  | 0 | 0 | 0 | 0 | 1 | 0 |
| ENSP00000444439 | SLC3A2      | 175  | 0 | 0 | 0 | 0 | 1 | 0 |
| ENSP00000444650 | DDB1        | 267  | 0 | 0 | 0 | 0 | 1 | 1 |
| ENSP00000445345 | SLC39A3     | 323  | 0 | 0 | 0 | 0 | 1 | 0 |
| ENSP00000446168 | MARS        | 546  | 0 | 0 | 0 | 0 | 2 | 0 |
| ENSP00000446373 | KRTAP2-1    | 124  | 0 | 0 | 0 | 0 | 1 | 1 |
| ENSP00000446768 | GPD1        | 326  | 0 | 0 | 0 | 0 | 1 | 2 |
| ENSP00000446779 | CS          | 400  | 0 | 0 | 0 | 0 | 1 | 0 |
| ENSP00000447058 | VPS29       | 182  | 0 | 0 | 0 | 0 | 1 | 1 |
| ENSP00000447764 | NACA        | 126  | 0 | 0 | 0 | 0 | 1 | 0 |
| ENSP00000448177 | PFKM        | 749  | 0 | 0 | 0 | 0 | 1 | 0 |
| ENSP00000448532 | HDAC7       | 974  | 0 | 0 | 0 | 0 | 1 | 0 |
| ENSP00000449554 | RAB5B       | 100  | 0 | 0 | 0 | 0 | 1 | 0 |
| ENSP00000449783 | KRT5        | 196  | 0 | 0 | 0 | 0 | 1 | 1 |
| ENSP00000450691 | NDRG2       | 252  | 0 | 0 | 0 | 0 | 1 | 0 |
| ENSP00000451422 | ATP6V1D     | 86   | 0 | 0 | 0 | 0 | 1 | 0 |
| ENSP00000452237 | KRT86       | 143  | 0 | 0 | 0 | 0 | 3 | 3 |
| ENSP00000452492 | ATP6V1D     | 59   | 0 | 0 | 0 | 0 | 1 | 0 |
| ENSP00000452535 | SAMD4A      | 718  | 0 | 0 | 0 | 0 | 1 | 0 |
| ENSP00000452573 | HNRNPC      | 117  | 0 | 0 | 0 | 0 | 1 | 1 |
| ENSP00000452817 | CCDC33      | 333  | 0 | 0 | 0 | 0 | 1 | 0 |
| ENSP00000453267 | DMXL2       | 1183 | 0 | 0 | 0 | 0 | 2 | 1 |
| ENSP00000453569 | DUOXA1      | 483  | 0 | 0 | 0 | 0 | 1 | 0 |
| ENSP00000454446 | MYO9A       | 1301 | 0 | 0 | 0 | 0 | 1 | 0 |
| ENSP00000455284 | CARHSP1     | 147  | 0 | 0 | 0 | 0 | 1 | 1 |
| ENSP00000455421 | NDRG4       | 154  | 0 | 0 | 0 | 0 | 1 | 0 |
| ENSP00000456124 | EPPK1       | 5088 | 0 | 0 | 0 | 0 | 2 | 0 |
| ENSP00000456302 | PMM2        | 155  | 0 | 0 | 0 | 0 | 1 | 0 |
| ENSP00000457268 | RPL4        | 170  | 0 | 0 | 0 | 0 | 1 | 0 |
| ENSP00000457496 | LPCAT2      | 188  | 0 | 0 | 0 | 0 | 1 | 0 |
| ENSP00000457827 | LOXL1       | 431  | 0 | 0 | 0 | 0 | 1 | 0 |
| ENSP00000458114 | TTC25       | 672  | 0 | 0 | 0 | 0 | 1 | 0 |
| ENSP00000458243 | KRTAP1-4    | 121  | 0 | 0 | 0 | 0 | 1 | 0 |
| ENSP00000458934 | RP1-18F17.1 | 436  | 0 | 0 | 0 | 0 | 2 | 1 |
| ENSP00000459509 | KRT33B      | 404  | 0 | 0 | 0 | 0 | 1 | 3 |
| ENSP00000460739 | KRT31       | 416  | 0 | 0 | 0 | 0 | 2 | 1 |
| ENSP00000460741 | P4HB        | 188  | 0 | 0 | 0 | 0 | 1 | 0 |
| ENSP00000461346 | CCDC84      | 332  | 0 | 0 | 0 | 0 | 1 | 0 |
| ENSP00000462374 | MBP         | 159  | 0 | 0 | 0 | 0 | 1 | 0 |
| ENSP00000462512 | COX10       | 168  | 0 | 0 | 0 | 0 | 1 | 0 |
| ENSP00000463779 | KSR1        | 130  | 0 | 0 | 0 | 0 | 1 | 0 |
| ENSP00000464066 | EIF4A1      | 214  | 0 | 0 | 0 | 0 | 1 | 0 |
| ENSP00000464200 | KPNB1       | 60   | 0 | 0 | 0 | 0 | 1 | 0 |
| ENSP00000464265 | UBBP4       | 229  | 0 | 0 | 0 | 0 | 1 | 1 |
| ENSP00000464512 | HELZ        | 1943 | 0 | 0 | 0 | 0 | 1 | 0 |
| ENSP00000464813 | RPL27       | 136  | 0 | 0 | 0 | 0 | 1 | 0 |
| ENSP00000464874 | ENO3        | 148  | 0 | 0 | 0 | 0 | 1 | 0 |
| ENSP00000465304 | SYT5        | 67   | 0 | 0 | 0 | 0 | 3 | 1 |
| ENSP00000465680 | ICAM1       | 180  | 0 | 0 | 0 | 0 | 1 | 0 |
| ENSP00000466544 | NCAM1       | 848  | 0 | 0 | 0 | 0 | 1 | 0 |
| ENSP00000466558 | TXNL1       | 138  | 0 | 0 | 0 | 0 | 1 | 0 |
| ENSP00000466574 | PGD         | 160  | 0 | 0 | 0 | 0 | 1 | 0 |
| ENSP00000466914 | DNM2        | 137  | 0 | 0 | 0 | 0 | 1 | 0 |
| ENSP00000467398 | PTPRS       | 1501 | 0 | 0 | 0 | 0 | 1 | 0 |
| ENSP00000467963 | HSPA12A     | 119  | 0 | 0 | 0 | 0 | 2 | 0 |
| ENSP00000468484 | H3F3B       | 151  | 0 | 0 | 0 | 0 | 1 | 0 |
| ENSP00000469468 | LSM4        | 139  | 0 | 0 | 0 | 0 | 1 | 0 |
| ENSP00000469662 | ARCN1       | 552  | 0 | 0 | 0 | 0 | 1 | 0 |

|                 |          |      |   |   |   |   |   |   |
|-----------------|----------|------|---|---|---|---|---|---|
| ENSP00000469896 | PPP2R2D  | 422  | 0 | 0 | 0 | 0 | 1 | 0 |
| ENSP00000470037 | RPL13A   | 210  | 0 | 0 | 0 | 0 | 1 | 0 |
| ENSP00000470142 | UPF1     | 1129 | 0 | 0 | 0 | 0 | 1 | 0 |
| ENSP00000470701 | FAM120C  | 895  | 0 | 0 | 0 | 0 | 1 | 0 |
| ENSP00000471000 | ZNF616   | 781  | 0 | 0 | 0 | 0 | 1 | 1 |
| ENSP00000471185 | RPS5     | 200  | 0 | 0 | 0 | 0 | 1 | 3 |
| ENSP00000471310 | ADCK4    | 134  | 0 | 0 | 0 | 0 | 1 | 0 |
| ENSP00000471621 | RPS19    | 102  | 0 | 0 | 0 | 0 | 2 | 0 |
| ENSP00000472264 | UBA52    | 128  | 0 | 0 | 0 | 0 | 2 | 1 |
| ENSP00000472265 | ATP6AP1  | 470  | 0 | 0 | 0 | 0 | 1 | 0 |
| ENSP00000472460 | ENO2     | 391  | 0 | 0 | 0 | 0 | 3 | 1 |
| ENSP00000472546 | PLA2G4C  | 551  | 0 | 0 | 0 | 0 | 1 | 0 |
| ENSP00000474440 | DNAJC8   | 106  | 0 | 0 | 0 | 0 | 1 | 1 |
| ENSP00000475565 | UBA2     | 54   | 0 | 0 | 0 | 0 | 1 | 0 |
| ENSP00000475950 | LSM4     | 125  | 0 | 0 | 0 | 0 | 1 | 0 |
| ENSP00000476832 | GDI2     | 125  | 0 | 0 | 0 | 0 | 1 | 0 |
| ENSP00000477496 | TSPEAR   | 669  | 0 | 0 | 0 | 0 | 1 | 0 |
| ENSP00000025399 | STRAP    | 363  | 0 | 0 | 0 | 0 | 0 | 1 |
| ENSP00000164640 | PDZD4    | 769  | 0 | 0 | 0 | 0 | 0 | 1 |
| ENSP00000205402 | DLD      | 509  | 0 | 0 | 0 | 0 | 0 | 1 |
| ENSP00000216605 | MTHFD1   | 935  | 0 | 0 | 0 | 0 | 0 | 1 |
| ENSP00000219169 | NUTF2    | 127  | 0 | 0 | 0 | 0 | 0 | 1 |
| ENSP00000225726 | CCDC47   | 483  | 0 | 0 | 0 | 0 | 0 | 1 |
| ENSP00000229922 | CAP2     | 477  | 0 | 0 | 0 | 0 | 0 | 1 |
| ENSP00000231721 | SEMA3G   | 782  | 0 | 0 | 0 | 0 | 0 | 1 |
| ENSP00000232905 | EIF1B    | 113  | 0 | 0 | 0 | 0 | 0 | 1 |
| ENSP00000237530 | RPN2     | 631  | 0 | 0 | 0 | 0 | 0 | 1 |
| ENSP00000237858 | GLRX     | 106  | 0 | 0 | 0 | 0 | 0 | 1 |
| ENSP00000238112 | CPSF3    | 684  | 0 | 0 | 0 | 0 | 0 | 1 |
| ENSP00000242315 | KIAA1045 | 400  | 0 | 0 | 0 | 0 | 0 | 2 |
| ENSP00000250448 | FOXA1    | 472  | 0 | 0 | 0 | 0 | 0 | 1 |
| ENSP00000251636 | DHX29    | 1369 | 0 | 0 | 0 | 0 | 0 | 1 |
| ENSP00000252322 | EFCAB4B  | 395  | 0 | 0 | 0 | 0 | 0 | 1 |
| ENSP00000252725 | ARPC1B   | 372  | 0 | 0 | 0 | 0 | 0 | 1 |
| ENSP00000255226 | SLC14A2  | 920  | 0 | 0 | 0 | 0 | 0 | 1 |
| ENSP00000256178 | LYVE1    | 322  | 0 | 0 | 0 | 0 | 0 | 1 |
| ENSP00000257017 | RAB33A   | 237  | 0 | 0 | 0 | 0 | 0 | 1 |
| ENSP00000258646 | RCBTB1   | 531  | 0 | 0 | 0 | 0 | 0 | 1 |
| ENSP00000260762 | EXOC6    | 804  | 0 | 0 | 0 | 0 | 0 | 1 |
| ENSP00000260983 | HECW2    | 1572 | 0 | 0 | 0 | 0 | 0 | 1 |
| ENSP00000261609 | HERC2    | 4834 | 0 | 0 | 0 | 0 | 0 | 1 |
| ENSP00000261632 | IFT88    | 824  | 0 | 0 | 0 | 0 | 0 | 1 |
| ENSP00000261776 | VAC14    | 782  | 0 | 0 | 0 | 0 | 0 | 1 |
| ENSP00000262320 | AXIN1    | 862  | 0 | 0 | 0 | 0 | 0 | 1 |
| ENSP00000262360 | CNTLN    | 1405 | 0 | 0 | 0 | 0 | 0 | 1 |
| ENSP00000262428 | COTL1    | 142  | 0 | 0 | 0 | 0 | 0 | 1 |
| ENSP00000262525 | ZNF629   | 869  | 0 | 0 | 0 | 0 | 0 | 1 |
| ENSP00000263368 | BLVRB    | 206  | 0 | 0 | 0 | 0 | 0 | 1 |
| ENSP00000263430 | LILRB5   | 491  | 0 | 0 | 0 | 0 | 0 | 1 |
| ENSP00000263867 | CAPG     | 348  | 0 | 0 | 0 | 0 | 0 | 1 |
| ENSP00000264158 | RAB3GAP1 | 981  | 0 | 0 | 0 | 0 | 0 | 1 |
| ENSP00000264414 | CUL3     | 768  | 0 | 0 | 0 | 0 | 0 | 1 |
| ENSP00000264613 | CP       | 1065 | 0 | 0 | 0 | 0 | 0 | 1 |
| ENSP00000264657 | STAT3    | 770  | 0 | 0 | 0 | 0 | 0 | 1 |
| ENSP00000265198 | IPCEF1   | 437  | 0 | 0 | 0 | 0 | 0 | 1 |
| ENSP00000265748 | ANLN     | 1124 | 0 | 0 | 0 | 0 | 0 | 1 |
| ENSP00000265840 | ELMOD1   | 334  | 0 | 0 | 0 | 0 | 0 | 1 |
| ENSP00000267396 | REM2     | 340  | 0 | 0 | 0 | 0 | 0 | 1 |

|                 |          |      |   |   |   |   |   |   |
|-----------------|----------|------|---|---|---|---|---|---|
| ENSP00000267890 | TTBK2    | 1244 | 0 | 0 | 0 | 0 | 0 | 1 |
| ENSP00000272238 | ATP6V1C2 | 427  | 0 | 0 | 0 | 0 | 0 | 1 |
| ENSP00000273654 | CCDC39   | 755  | 0 | 0 | 0 | 0 | 0 | 1 |
| ENSP00000273794 | VWA5B2   | 1024 | 0 | 0 | 0 | 0 | 0 | 1 |
| ENSP00000276461 | ERLIN2   | 339  | 0 | 0 | 0 | 0 | 0 | 1 |
| ENSP00000277549 | CACNA1B  | 1533 | 0 | 0 | 0 | 0 | 0 | 1 |
| ENSP00000277551 | CACNA1B  | 2237 | 0 | 0 | 0 | 0 | 0 | 1 |
| ENSP00000278520 | CCDC82   | 544  | 0 | 0 | 0 | 0 | 0 | 1 |
| ENSP00000280758 | BTBD11   | 1104 | 0 | 0 | 0 | 0 | 0 | 1 |
| ENSP00000281405 | WDR35    | 1170 | 0 | 0 | 0 | 0 | 0 | 1 |
| ENSP00000282516 | NIPBL    | 2804 | 0 | 0 | 0 | 0 | 0 | 1 |
| ENSP00000284049 | CHD1     | 1710 | 0 | 0 | 0 | 0 | 0 | 1 |
| ENSP00000286627 | KCNMA1   | 1178 | 0 | 0 | 0 | 0 | 0 | 1 |
| ENSP00000286713 | STOM     | 288  | 0 | 0 | 0 | 0 | 0 | 1 |
| ENSP00000288048 | C1orf158 | 194  | 0 | 0 | 0 | 0 | 0 | 1 |
| ENSP00000289352 | HIST1H4H | 103  | 0 | 0 | 0 | 0 | 0 | 1 |
| ENSP00000290178 | PAXBP1   | 815  | 0 | 0 | 0 | 0 | 0 | 1 |
| ENSP00000291906 | PKN3     | 889  | 0 | 0 | 0 | 0 | 0 | 1 |
| ENSP00000296412 | ADH5     | 374  | 0 | 0 | 0 | 0 | 0 | 1 |
| ENSP00000297186 | RSPH10B2 | 870  | 0 | 0 | 0 | 0 | 0 | 1 |
| ENSP00000297540 | PHAX     | 394  | 0 | 0 | 0 | 0 | 0 | 1 |
| ENSP00000298315 | EML5     | 1931 | 0 | 0 | 0 | 0 | 0 | 1 |
| ENSP00000298693 | ARHGEF40 | 1471 | 0 | 0 | 0 | 0 | 0 | 1 |
| ENSP00000299106 | JAM3     | 310  | 0 | 0 | 0 | 0 | 0 | 1 |
| ENSP00000300141 | DPP8     | 882  | 0 | 0 | 0 | 0 | 0 | 1 |
| ENSP00000300481 | TRPM2    | 1449 | 0 | 0 | 0 | 0 | 0 | 2 |
| ENSP00000300482 | TRPM2    | 1503 | 0 | 0 | 0 | 0 | 0 | 1 |
| ENSP00000301030 | ANKRD11  | 2663 | 0 | 0 | 0 | 0 | 0 | 1 |
| ENSP00000301624 | TNRC6C   | 1690 | 0 | 0 | 0 | 0 | 0 | 1 |
| ENSP00000301924 | TRIM35   | 493  | 0 | 0 | 0 | 0 | 0 | 1 |
| ENSP00000302237 | GNAS     | 625  | 0 | 0 | 0 | 0 | 0 | 1 |
| ENSP00000302873 | GPS1     | 491  | 0 | 0 | 0 | 0 | 0 | 1 |
| ENSP00000303153 | COL22A1  | 1626 | 0 | 0 | 0 | 0 | 0 | 1 |
| ENSP00000303659 | RGPD3    | 1766 | 0 | 0 | 0 | 0 | 0 | 1 |
| ENSP00000304408 | COL3A1   | 1466 | 0 | 0 | 0 | 0 | 0 | 1 |
| ENSP00000305161 | TRIM56   | 755  | 0 | 0 | 0 | 0 | 0 | 1 |
| ENSP00000305790 | SF3B3    | 1217 | 0 | 0 | 0 | 0 | 0 | 1 |
| ENSP00000306351 | ZNF182   | 639  | 0 | 0 | 0 | 0 | 0 | 1 |
| ENSP00000306983 | YEATS2   | 1422 | 0 | 0 | 0 | 0 | 0 | 1 |
| ENSP00000307156 | LAMB2    | 1798 | 0 | 0 | 0 | 0 | 0 | 1 |
| ENSP00000307272 | RPTOR    | 1335 | 0 | 0 | 0 | 0 | 0 | 2 |
| ENSP00000308268 | CARNS1   | 827  | 0 | 0 | 0 | 0 | 0 | 1 |
| ENSP00000308450 | CDC20    | 499  | 0 | 0 | 0 | 0 | 0 | 1 |
| ENSP00000309432 | FAM134C  | 466  | 0 | 0 | 0 | 0 | 0 | 1 |
| ENSP00000309560 | C17orf66 | 570  | 0 | 0 | 0 | 0 | 0 | 1 |
| ENSP00000309830 | RPL38    | 70   | 0 | 0 | 0 | 0 | 0 | 2 |
| ENSP00000310227 | CKAP5    | 1972 | 0 | 0 | 0 | 0 | 0 | 1 |
| ENSP00000310649 | BRSK1    | 778  | 0 | 0 | 0 | 0 | 0 | 1 |
| ENSP00000310723 | DDX23    | 820  | 0 | 0 | 0 | 0 | 0 | 1 |
| ENSP00000313007 | PABPC1   | 636  | 0 | 0 | 0 | 0 | 0 | 1 |
| ENSP00000313490 | PFAS     | 1338 | 0 | 0 | 0 | 0 | 0 | 1 |
| ENSP00000313569 | GPS1     | 471  | 0 | 0 | 0 | 0 | 0 | 1 |
| ENSP00000317955 | EEA1     | 1411 | 0 | 0 | 0 | 0 | 0 | 1 |
| ENSP00000320006 | MPDZ     | 2070 | 0 | 0 | 0 | 0 | 0 | 1 |
| ENSP00000320853 | BRSK1    | 473  | 0 | 0 | 0 | 0 | 0 | 1 |
| ENSP00000321519 | C19orf18 | 215  | 0 | 0 | 0 | 0 | 0 | 1 |
| ENSP00000324729 | SAV1     | 383  | 0 | 0 | 0 | 0 | 0 | 1 |
| ENSP00000325628 | GRAMD1B  | 738  | 0 | 0 | 0 | 0 | 0 | 1 |

|                 |            |      |   |   |   |   |   |     |
|-----------------|------------|------|---|---|---|---|---|-----|
| ENSP00000326547 | USP54      | 744  | 0 | 0 | 0 | 0 | 0 | 1   |
| ENSP00000326693 | SLC25A42   | 318  | 0 | 0 | 0 | 0 | 0 | 1   |
| ENSP00000328524 | DENND5A    | 1287 | 0 | 0 | 0 | 0 | 0 | 1   |
| ENSP00000329943 | LRRC36     | 754  | 0 | 0 | 0 | 0 | 0 | 1   |
| ENSP00000330199 | SLC6A17    | 727  | 0 | 0 | 0 | 0 | 0 | 1   |
| ENSP00000330219 | SYN3       | 580  | 0 | 0 | 0 | 0 | 0 | 2   |
| ENSP00000330484 | AMY1B      | 511  | 0 | 0 | 0 | 0 | 0 | 1   |
| ENSP00000330877 | TEX40      | 200  | 0 | 0 | 0 | 0 | 0 | 1   |
| ENSP00000331487 | NPLOC4     | 608  | 0 | 0 | 0 | 0 | 0 | 1   |
| ENSP00000332049 | CD86       | 329  | 0 | 0 | 0 | 0 | 0 | 1   |
| ENSP00000334090 | AL603965.1 | 161  | 0 | 0 | 0 | 0 | 0 | 0.5 |
| ENSP00000334714 | IGFN1      | 3708 | 0 | 0 | 0 | 0 | 0 | 1   |
| ENSP00000336739 | CDC14A     | 594  | 0 | 0 | 0 | 0 | 0 | 1   |
| ENSP00000336783 | TNRC6C     | 1726 | 0 | 0 | 0 | 0 | 0 | 1   |
| ENSP00000337724 | ZNF202     | 648  | 0 | 0 | 0 | 0 | 0 | 1   |
| ENSP00000338766 | NPHP3      | 1330 | 0 | 0 | 0 | 0 | 0 | 1   |
| ENSP00000339057 | GPRASP2    | 838  | 0 | 0 | 0 | 0 | 0 | 1   |
| ENSP00000339064 | RPL32      | 153  | 0 | 0 | 0 | 0 | 0 | 1   |
| ENSP00000339157 | CPM        | 443  | 0 | 0 | 0 | 0 | 0 | 1   |
| ENSP00000339208 | DPP8       | 898  | 0 | 0 | 0 | 0 | 0 | 1   |
| ENSP00000339247 | CSNK2A1    | 391  | 0 | 0 | 0 | 0 | 0 | 1   |
| ENSP00000339389 | OTUD6A     | 288  | 0 | 0 | 0 | 0 | 0 | 1   |
| ENSP00000340179 | KIF24      | 1234 | 0 | 0 | 0 | 0 | 0 | 1   |
| ENSP00000340278 | PARK7      | 189  | 0 | 0 | 0 | 0 | 0 | 1   |
| ENSP00000341466 | KIF18B     | 855  | 0 | 0 | 0 | 0 | 0 | 1   |
| ENSP00000341905 | RASAL3     | 1011 | 0 | 0 | 0 | 0 | 0 | 1   |
| ENSP00000342143 | PDZK1      | 519  | 0 | 0 | 0 | 0 | 0 | 1   |
| ENSP00000342278 | OAS2       | 719  | 0 | 0 | 0 | 0 | 0 | 1   |
| ENSP00000342487 | CACUL1     | 303  | 0 | 0 | 0 | 0 | 0 | 1   |
| ENSP00000343683 | SNCA       | 112  | 0 | 0 | 0 | 0 | 0 | 1   |
| ENSP00000344572 | FIBP       | 364  | 0 | 0 | 0 | 0 | 0 | 1   |
| ENSP00000345398 | ACLY       | 1091 | 0 | 0 | 0 | 0 | 0 | 1   |
| ENSP00000346001 | RPL3       | 403  | 0 | 0 | 0 | 0 | 0 | 1   |
| ENSP00000346120 | DDX21      | 783  | 0 | 0 | 0 | 0 | 0 | 1   |
| ENSP00000346321 | KCNMA1     | 1239 | 0 | 0 | 0 | 0 | 0 | 1   |
| ENSP00000346901 | FMO1       | 532  | 0 | 0 | 0 | 0 | 0 | 1   |
| ENSP00000346921 | AK2        | 239  | 0 | 0 | 0 | 0 | 0 | 1   |
| ENSP00000347379 | OCLN       | 522  | 0 | 0 | 0 | 0 | 0 | 1   |
| ENSP00000348020 | MLH3       | 1453 | 0 | 0 | 0 | 0 | 0 | 1   |
| ENSP00000348831 | NUDT10     | 164  | 0 | 0 | 0 | 0 | 0 | 1   |
| ENSP00000348889 | ANXA6      | 667  | 0 | 0 | 0 | 0 | 0 | 1   |
| ENSP00000349359 | SASH3      | 380  | 0 | 0 | 0 | 0 | 0 | 1   |
| ENSP00000349811 | FKBP5      | 457  | 0 | 0 | 0 | 0 | 0 | 1   |
| ENSP00000350392 | C17orf102  | 167  | 0 | 0 | 0 | 0 | 0 | 1   |
| ENSP00000351894 | NCOA6      | 2063 | 0 | 0 | 0 | 0 | 0 | 1   |
| ENSP00000352019 | CCT6A      | 486  | 0 | 0 | 0 | 0 | 0 | 2   |
| ENSP00000352920 | ZMYM1      | 1142 | 0 | 0 | 0 | 0 | 0 | 1   |
| ENSP00000354851 | KIF21A     | 1661 | 0 | 0 | 0 | 0 | 0 | 1   |
| ENSP00000354878 | KIF21A     | 1674 | 0 | 0 | 0 | 0 | 0 | 1   |
| ENSP00000355010 | IGSF1      | 1336 | 0 | 0 | 0 | 0 | 0 | 1   |
| ENSP00000355565 | RBM34      | 425  | 0 | 0 | 0 | 0 | 0 | 1   |
| ENSP00000355644 | ACTA1      | 289  | 0 | 0 | 0 | 0 | 0 | 2   |
| ENSP00000355739 | ADCK3      | 647  | 0 | 0 | 0 | 0 | 0 | 1   |
| ENSP00000355740 | ADCK3      | 595  | 0 | 0 | 0 | 0 | 0 | 1   |
| ENSP00000356129 | DSTYK      | 884  | 0 | 0 | 0 | 0 | 0 | 1   |
| ENSP00000356146 | SCAF8      | 1271 | 0 | 0 | 0 | 0 | 0 | 1   |
| ENSP00000356189 | IPCEF1     | 438  | 0 | 0 | 0 | 0 | 0 | 1   |
| ENSP00000356593 | VTA1       | 249  | 0 | 0 | 0 | 0 | 0 | 1   |

|                 |            |      |   |   |   |   |   |     |
|-----------------|------------|------|---|---|---|---|---|-----|
| ENSP00000356602 | VTA1       | 307  | 0 | 0 | 0 | 0 | 0 | 1   |
| ENSP00000357112 | AIM2       | 343  | 0 | 0 | 0 | 0 | 0 | 1   |
| ENSP00000357206 | NES        | 1621 | 0 | 0 | 0 | 0 | 0 | 1   |
| ENSP00000357285 | LAMTOR2    | 150  | 0 | 0 | 0 | 0 | 0 | 1   |
| ENSP00000357618 | DPYSL4     | 412  | 0 | 0 | 0 | 0 | 0 | 1   |
| ENSP00000358853 | SH3BGR2    | 107  | 0 | 0 | 0 | 0 | 0 | 2   |
| ENSP00000359097 | AMY1B      | 511  | 0 | 0 | 0 | 0 | 0 | 1   |
| ENSP00000359947 | IGSF1      | 1327 | 0 | 0 | 0 | 0 | 0 | 1   |
| ENSP00000360598 | EXOC6      | 153  | 0 | 0 | 0 | 0 | 0 | 1   |
| ENSP00000361107 | BMP1R1A    | 532  | 0 | 0 | 0 | 0 | 0 | 1   |
| ENSP00000361540 | CDC20      | 499  | 0 | 0 | 0 | 0 | 0 | 1   |
| ENSP00000361884 | CAP1       | 474  | 0 | 0 | 0 | 0 | 0 | 1   |
| ENSP00000362427 | ZMYM1      | 1142 | 0 | 0 | 0 | 0 | 0 | 1   |
| ENSP00000362724 | RPN2       | 615  | 0 | 0 | 0 | 0 | 0 | 1   |
| ENSP00000363512 | ALOX5      | 674  | 0 | 0 | 0 | 0 | 0 | 1   |
| ENSP00000363879 | NPLOC4     | 617  | 0 | 0 | 0 | 0 | 0 | 1   |
| ENSP00000364265 | FOXO1      | 373  | 0 | 0 | 0 | 0 | 0 | 1   |
| ENSP00000365383 | C1orf158   | 156  | 0 | 0 | 0 | 0 | 0 | 1   |
| ENSP00000365480 | SYP        | 40   | 0 | 0 | 0 | 0 | 0 | 1   |
| ENSP00000365773 | PSAT1      | 370  | 0 | 0 | 0 | 0 | 0 | 1   |
| ENSP00000366364 | NEBL       | 236  | 0 | 0 | 0 | 0 | 0 | 1   |
| ENSP00000366488 | PRKACG     | 351  | 0 | 0 | 0 | 0 | 0 | 1   |
| ENSP00000366708 | PARK7      | 189  | 0 | 0 | 0 | 0 | 0 | 1   |
| ENSP00000367034 | HIST1H4C   | 103  | 0 | 0 | 0 | 0 | 0 | 1   |
| ENSP00000367552 | RCBTB1     | 531  | 0 | 0 | 0 | 0 | 0 | 1   |
| ENSP00000368464 | KIF24      | 1368 | 0 | 0 | 0 | 0 | 0 | 1   |
| ENSP00000369375 | TEK        | 1124 | 0 | 0 | 0 | 0 | 0 | 1   |
| ENSP00000369991 | KATNAL1    | 490  | 0 | 0 | 0 | 0 | 0 | 1   |
| ENSP00000370196 | SBF1       | 1893 | 0 | 0 | 0 | 0 | 0 | 1   |
| ENSP00000370493 | KIF2A      | 686  | 0 | 0 | 0 | 0 | 0 | 1   |
| ENSP00000370526 | ARSE       | 589  | 0 | 0 | 0 | 0 | 0 | 1   |
| ENSP00000371548 | LGI2       | 545  | 0 | 0 | 0 | 0 | 0 | 0.5 |
| ENSP00000372005 | DNAJC19    | 116  | 0 | 0 | 0 | 0 | 0 | 1   |
| ENSP00000372191 | SIRT3      | 399  | 0 | 0 | 0 | 0 | 0 | 1   |
| ENSP00000372316 | POLN       | 900  | 0 | 0 | 0 | 0 | 0 | 1   |
| ENSP00000372683 | ZBTB22     | 634  | 0 | 0 | 0 | 0 | 0 | 1   |
| ENSP00000373586 | C2orf54    | 447  | 0 | 0 | 0 | 0 | 0 | 1   |
| ENSP00000373998 | CCDC64B    | 508  | 0 | 0 | 0 | 0 | 0 | 1   |
| ENSP00000375413 | AC011841.1 | 149  | 0 | 0 | 0 | 0 | 0 | 1   |
| ENSP00000375638 | TFPT       | 244  | 0 | 0 | 0 | 0 | 0 | 1   |
| ENSP00000376800 | MTPN       | 118  | 0 | 0 | 0 | 0 | 0 | 2   |
| ENSP00000377047 | PTPRZ1     | 2315 | 0 | 0 | 0 | 0 | 0 | 1   |
| ENSP00000377428 | WDR52      | 1854 | 0 | 0 | 0 | 0 | 0 | 1   |
| ENSP00000377549 | FABP6      | 177  | 0 | 0 | 0 | 0 | 0 | 1   |
| ENSP00000377570 | KRT34      | 436  | 0 | 0 | 0 | 0 | 0 | 1   |
| ENSP00000377969 | GTF2F1     | 517  | 0 | 0 | 0 | 0 | 0 | 1   |
| ENSP00000378336 | MAP2K2     | 303  | 0 | 0 | 0 | 0 | 0 | 1   |
| ENSP00000379654 | KIAA0430   | 1742 | 0 | 0 | 0 | 0 | 0 | 1   |
| ENSP00000379995 | ATP6V1H    | 483  | 0 | 0 | 0 | 0 | 0 | 1   |
| ENSP00000380068 | GAPDH      | 335  | 0 | 0 | 0 | 0 | 0 | 1   |
| ENSP00000380460 | PLAA       | 795  | 0 | 0 | 0 | 0 | 0 | 1   |
| ENSP00000381026 | TRPM2      | 1553 | 0 | 0 | 0 | 0 | 0 | 2   |
| ENSP00000381214 | RGPD2      | 1756 | 0 | 0 | 0 | 0 | 0 | 1   |
| ENSP00000381693 | ZSWIM8     | 1842 | 0 | 0 | 0 | 0 | 0 | 1   |
| ENSP00000381970 | GIN1       | 522  | 0 | 0 | 0 | 0 | 0 | 1   |
| ENSP00000382732 | ITPA       | 153  | 0 | 0 | 0 | 0 | 0 | 1   |
| ENSP00000384312 | TRIOBP     | 2365 | 0 | 0 | 0 | 0 | 0 | 1   |
| ENSP00000384766 | RSPH10B2   | 870  | 0 | 0 | 0 | 0 | 0 | 1   |



|                 |          |      |   |   |   |   |   |   |
|-----------------|----------|------|---|---|---|---|---|---|
| ENSP00000385433 | FABP6    | 128  | 0 | 0 | 0 | 0 | 0 | 1 |
| ENSP00000385762 | RPL3     | 272  | 0 | 0 | 0 | 0 | 0 | 1 |
| ENSP00000386525 | CUL3     | 744  | 0 | 0 | 0 | 0 | 0 | 1 |
| ENSP00000386965 | CAPG     | 348  | 0 | 0 | 0 | 0 | 0 | 1 |
| ENSP00000387688 | RPL35A   | 94   | 0 | 0 | 0 | 0 | 0 | 1 |
| ENSP00000388325 | LAMB2    | 1798 | 0 | 0 | 0 | 0 | 0 | 1 |
| ENSP00000389631 | ARPC1B   | 372  | 0 | 0 | 0 | 0 | 0 | 1 |
| ENSP00000390088 | TNK2     | 143  | 0 | 0 | 0 | 0 | 0 | 1 |
| ENSP00000390262 | EPB41L1  | 119  | 0 | 0 | 0 | 0 | 0 | 1 |
| ENSP00000390802 | WDR35    | 873  | 0 | 0 | 0 | 0 | 0 | 1 |
| ENSP00000390987 | KIT      | 972  | 0 | 0 | 0 | 0 | 0 | 1 |
| ENSP00000391437 | CPSF6    | 478  | 0 | 0 | 0 | 0 | 0 | 1 |
| ENSP00000392270 | STRAP    | 350  | 0 | 0 | 0 | 0 | 0 | 1 |
| ENSP00000392408 | ZZZ3     | 36   | 0 | 0 | 0 | 0 | 0 | 1 |
| ENSP00000393779 | ZZZ3     | 57   | 0 | 0 | 0 | 0 | 0 | 1 |
| ENSP00000394485 | PDZK1    | 519  | 0 | 0 | 0 | 0 | 0 | 1 |
| ENSP00000394874 | C2orf54  | 108  | 0 | 0 | 0 | 0 | 0 | 1 |
| ENSP00000396320 | SCN4A    | 1836 | 0 | 0 | 0 | 0 | 0 | 1 |
| ENSP00000397002 | TEX22    | 150  | 0 | 0 | 0 | 0 | 0 | 1 |
| ENSP00000397156 | CCDC82   | 544  | 0 | 0 | 0 | 0 | 0 | 1 |
| ENSP00000398058 | RPL35A   | 55   | 0 | 0 | 0 | 0 | 0 | 1 |
| ENSP00000398189 | UCHL3    | 228  | 0 | 0 | 0 | 0 | 0 | 1 |
| ENSP00000398316 | HK1      | 114  | 0 | 0 | 0 | 0 | 0 | 1 |
| ENSP00000398688 | VWA5B2   | 1242 | 0 | 0 | 0 | 0 | 0 | 1 |
| ENSP00000398779 | PPP2R2B  | 443  | 0 | 0 | 0 | 0 | 0 | 1 |
| ENSP00000400000 | RBM34    | 408  | 0 | 0 | 0 | 0 | 0 | 1 |
| ENSP00000400435 | SLC35E1  | 344  | 0 | 0 | 0 | 0 | 0 | 1 |
| ENSP00000401010 | CAPZB    | 301  | 0 | 0 | 0 | 0 | 0 | 1 |
| ENSP00000401519 | CARNS1   | 827  | 0 | 0 | 0 | 0 | 0 | 1 |
| ENSP00000402343 | ZNF469   | 3925 | 0 | 0 | 0 | 0 | 0 | 1 |
| ENSP00000402592 | AP2M1    | 160  | 0 | 0 | 0 | 0 | 0 | 1 |
| ENSP00000404186 | TRIM56   | 305  | 0 | 0 | 0 | 0 | 0 | 1 |
| ENSP00000404710 | USP54    | 153  | 0 | 0 | 0 | 0 | 0 | 1 |
| ENSP00000404979 | ANLN     | 169  | 0 | 0 | 0 | 0 | 0 | 1 |
| ENSP00000406982 | FMO1     | 208  | 0 | 0 | 0 | 0 | 0 | 1 |
| ENSP00000407748 | CCT8     | 107  | 0 | 0 | 0 | 0 | 0 | 1 |
| ENSP00000410474 | CTBP2    | 445  | 0 | 0 | 0 | 0 | 0 | 1 |
| ENSP00000412388 | C9orf172 | 976  | 0 | 0 | 0 | 0 | 0 | 1 |
| ENSP00000412393 | RPL32    | 133  | 0 | 0 | 0 | 0 | 0 | 1 |
| ENSP00000414225 | LILRB5   | 622  | 0 | 0 | 0 | 0 | 0 | 1 |
| ENSP00000416968 | DCTN4    | 460  | 0 | 0 | 0 | 0 | 0 | 1 |
| ENSP00000417016 | DLD      | 486  | 0 | 0 | 0 | 0 | 0 | 1 |
| ENSP00000417371 | WDR52    | 991  | 0 | 0 | 0 | 0 | 0 | 1 |
| ENSP00000417960 | CCDC39   | 671  | 0 | 0 | 0 | 0 | 0 | 1 |
| ENSP00000418749 | ZNF76    | 101  | 0 | 0 | 0 | 0 | 0 | 1 |
| ENSP00000418773 | CP       | 946  | 0 | 0 | 0 | 0 | 0 | 2 |
| ENSP00000418957 | CPSF3    | 647  | 0 | 0 | 0 | 0 | 0 | 1 |
| ENSP00000418988 | CD86     | 247  | 0 | 0 | 0 | 0 | 0 | 1 |
| ENSP00000419100 | PLCH1    | 1014 | 0 | 0 | 0 | 0 | 0 | 1 |
| ENSP00000419191 | DNAJC19  | 91   | 0 | 0 | 0 | 0 | 0 | 1 |
| ENSP00000419744 | CPSF3    | 136  | 0 | 0 | 0 | 0 | 0 | 1 |
| ENSP00000420545 | CP       | 852  | 0 | 0 | 0 | 0 | 0 | 2 |
| ENSP00000421170 | MYO10    | 1397 | 0 | 0 | 0 | 0 | 0 | 1 |
| ENSP00000421309 | MYO10    | 830  | 0 | 0 | 0 | 0 | 0 | 1 |
| ENSP00000424245 | CAMK2D   | 512  | 0 | 0 | 0 | 0 | 0 | 1 |
| ENSP00000424740 | CANX     | 170  | 0 | 0 | 0 | 0 | 0 | 1 |
| ENSP00000424760 | GNB2L1   | 147  | 0 | 0 | 0 | 0 | 0 | 1 |
| ENSP00000426401 | POLN     | 524  | 0 | 0 | 0 | 0 | 0 | 1 |

|                 |          |      |   |   |   |   |   |   |
|-----------------|----------|------|---|---|---|---|---|---|
| ENSP00000426676 | EPN3     | 17   | 0 | 0 | 0 | 0 | 0 | 1 |
| ENSP00000428069 | ATP6V1B2 | 56   | 0 | 0 | 0 | 0 | 0 | 3 |
| ENSP00000428816 | PPP2CA   | 145  | 0 | 0 | 0 | 0 | 0 | 1 |
| ENSP00000428948 | PABPC1   | 165  | 0 | 0 | 0 | 0 | 0 | 1 |
| ENSP00000429229 | ERLIN2   | 197  | 0 | 0 | 0 | 0 | 0 | 1 |
| ENSP00000430447 | PLAA     | 290  | 0 | 0 | 0 | 0 | 0 | 1 |
| ENSP00000430686 | TEK      | 976  | 0 | 0 | 0 | 0 | 0 | 1 |
| ENSP00000431223 | ZNF202   | 126  | 0 | 0 | 0 | 0 | 0 | 1 |
| ENSP00000431329 | CACUL1   | 303  | 0 | 0 | 0 | 0 | 0 | 1 |
| ENSP00000431457 | FIBP     | 137  | 0 | 0 | 0 | 0 | 0 | 1 |
| ENSP00000431988 | EPB41L2  | 706  | 0 | 0 | 0 | 0 | 0 | 1 |
| ENSP00000432472 | BRK1     | 75   | 0 | 0 | 0 | 0 | 0 | 1 |
| ENSP00000432549 | DENND5A  | 630  | 0 | 0 | 0 | 0 | 0 | 1 |
| ENSP00000432768 | CKAP5    | 2032 | 0 | 0 | 0 | 0 | 0 | 1 |
| ENSP00000433232 | ELMOD1   | 328  | 0 | 0 | 0 | 0 | 0 | 1 |
| ENSP00000434750 | OPCML    | 338  | 0 | 0 | 0 | 0 | 0 | 1 |
| ENSP00000435130 | GRHL3    | 52   | 0 | 0 | 0 | 0 | 0 | 1 |
| ENSP00000436500 | GRAMD1B  | 738  | 0 | 0 | 0 | 0 | 0 | 1 |
| ENSP00000436792 | CSRP1    | 193  | 0 | 0 | 0 | 0 | 0 | 1 |
| ENSP00000437216 | SIRT3    | 257  | 0 | 0 | 0 | 0 | 0 | 1 |
| ENSP00000437394 | GPRASP2  | 838  | 0 | 0 | 0 | 0 | 0 | 1 |
| ENSP00000438198 | ARSE     | 544  | 0 | 0 | 0 | 0 | 0 | 1 |
| ENSP00000438588 | MTHFD1   | 1020 | 0 | 0 | 0 | 0 | 0 | 1 |
| ENSP00000439693 | SLC24A1  | 1012 | 0 | 0 | 0 | 0 | 0 | 1 |
| ENSP00000440243 | UBAP1L   | 381  | 0 | 0 | 0 | 0 | 0 | 1 |
| ENSP00000441241 | LDHA     | 144  | 0 | 0 | 0 | 0 | 0 | 1 |
| ENSP00000441883 | RAB35    | 152  | 0 | 0 | 0 | 0 | 0 | 1 |
| ENSP00000441942 | XPNPEP3  | 484  | 0 | 0 | 0 | 0 | 0 | 1 |
| ENSP00000442074 | DAD1     | 65   | 0 | 0 | 0 | 0 | 0 | 1 |
| ENSP00000442479 | RPTOR    | 1177 | 0 | 0 | 0 | 0 | 0 | 2 |
| ENSP00000443865 | SPI1     | 35   | 0 | 0 | 0 | 0 | 0 | 1 |
| ENSP00000444138 | KIAA1045 | 400  | 0 | 0 | 0 | 0 | 0 | 2 |
| ENSP00000444250 | SLC3A2   | 47   | 0 | 0 | 0 | 0 | 0 | 1 |
| ENSP00000444306 | RAB3GAP1 | 935  | 0 | 0 | 0 | 0 | 0 | 1 |
| ENSP00000444369 | C10orf90 | 796  | 0 | 0 | 0 | 0 | 0 | 1 |
| ENSP00000444659 | BRK1     | 105  | 0 | 0 | 0 | 0 | 0 | 1 |
| ENSP00000444987 | ACTR3    | 367  | 0 | 0 | 0 | 0 | 0 | 1 |
| ENSP00000445412 | FKBP5    | 278  | 0 | 0 | 0 | 0 | 0 | 1 |
| ENSP00000445764 | STOM     | 237  | 0 | 0 | 0 | 0 | 0 | 1 |
| ENSP00000446358 | MPDZ     | 2084 | 0 | 0 | 0 | 0 | 0 | 1 |
| ENSP00000447030 | TMBIM6   | 200  | 0 | 0 | 0 | 0 | 0 | 1 |
| ENSP00000447113 | ZBTB22   | 634  | 0 | 0 | 0 | 0 | 0 | 1 |
| ENSP00000447455 | CPM      | 198  | 0 | 0 | 0 | 0 | 0 | 1 |
| ENSP00000447788 | DNM1L    | 261  | 0 | 0 | 0 | 0 | 0 | 1 |
| ENSP00000448322 | BTBD11   | 183  | 0 | 0 | 0 | 0 | 0 | 1 |
| ENSP00000449003 | AK2      | 190  | 0 | 0 | 0 | 0 | 0 | 1 |
| ENSP00000449371 | CUX1     | 662  | 0 | 0 | 0 | 0 | 0 | 1 |
| ENSP00000450309 | KIAA0430 | 1742 | 0 | 0 | 0 | 0 | 0 | 1 |
| ENSP00000451130 | MLH3     | 477  | 0 | 0 | 0 | 0 | 0 | 1 |
| ENSP00000451492 | SAV1     | 312  | 0 | 0 | 0 | 0 | 0 | 1 |
| ENSP00000451651 | POMT2    | 193  | 0 | 0 | 0 | 0 | 0 | 1 |
| ENSP00000451966 | NDRG2    | 300  | 0 | 0 | 0 | 0 | 0 | 1 |
| ENSP00000451998 | EML5     | 1977 | 0 | 0 | 0 | 0 | 0 | 1 |
| ENSP00000452794 | UBAP1L   | 117  | 0 | 0 | 0 | 0 | 0 | 1 |
| ENSP00000452974 | PIGH     | 133  | 0 | 0 | 0 | 0 | 0 | 1 |
| ENSP00000453679 | RAB8B    | 92   | 0 | 0 | 0 | 0 | 0 | 2 |
| ENSP00000455103 | LRRC36   | 633  | 0 | 0 | 0 | 0 | 0 | 1 |
| ENSP00000455653 | CUX1     | 662  | 0 | 0 | 0 | 0 | 0 | 1 |

|                 |           |      |   |   |   |   |   |     |
|-----------------|-----------|------|---|---|---|---|---|-----|
| ENSP00000456267 | ABAT      | 65   | 0 | 0 | 0 | 0 | 0 | 1   |
| ENSP00000456315 | GSTM1     | 102  | 0 | 0 | 0 | 0 | 0 | 1   |
| ENSP00000456330 | ABAT      | 515  | 0 | 0 | 0 | 0 | 0 | 1   |
| ENSP00000458262 | PAXBP1    | 917  | 0 | 0 | 0 | 0 | 0 | 1   |
| ENSP00000458301 | PRPSAP2   | 260  | 0 | 0 | 0 | 0 | 0 | 1   |
| ENSP00000458767 | HERC2     | 4834 | 0 | 0 | 0 | 0 | 0 | 1   |
| ENSP00000459436 | OCLN      | 130  | 0 | 0 | 0 | 0 | 0 | 1   |
| ENSP00000460902 | GIN1      | 522  | 0 | 0 | 0 | 0 | 0 | 1   |
| ENSP00000461221 | KRT33A    | 404  | 0 | 0 | 0 | 0 | 0 | 1   |
| ENSP00000461241 | PRPSAP2   | 143  | 0 | 0 | 0 | 0 | 0 | 1   |
| ENSP00000462265 | GPS1      | 487  | 0 | 0 | 0 | 0 | 0 | 1   |
| ENSP00000462837 | RPL38     | 64   | 0 | 0 | 0 | 0 | 0 | 1   |
| ENSP00000463309 | EIF4A1    | 134  | 0 | 0 | 0 | 0 | 0 | 1   |
| ENSP00000463312 | RPL38     | 67   | 0 | 0 | 0 | 0 | 0 | 2   |
| ENSP00000463895 | IMPACT    | 106  | 0 | 0 | 0 | 0 | 0 | 2   |
| ENSP00000463963 | SCN4A     | 1836 | 0 | 0 | 0 | 0 | 0 | 1   |
| ENSP00000465004 | FAM134C   | 129  | 0 | 0 | 0 | 0 | 0 | 1   |
| ENSP00000465377 | KIF18B    | 833  | 0 | 0 | 0 | 0 | 0 | 0.5 |
| ENSP00000465576 | SYT5      | 382  | 0 | 0 | 0 | 0 | 0 | 3   |
| ENSP00000465953 | SLC14A2   | 920  | 0 | 0 | 0 | 0 | 0 | 1   |
| ENSP00000465992 | KIF18B    | 852  | 0 | 0 | 0 | 0 | 0 | 1   |
| ENSP00000466321 | EIF1      | 121  | 0 | 0 | 0 | 0 | 0 | 1   |
| ENSP00000466656 | PIN1      | 145  | 0 | 0 | 0 | 0 | 0 | 1   |
| ENSP00000466780 | PIN1      | 90   | 0 | 0 | 0 | 0 | 0 | 1   |
| ENSP00000467173 | STAT3     | 84   | 0 | 0 | 0 | 0 | 0 | 1   |
| ENSP00000469091 | GTF2F1    | 433  | 0 | 0 | 0 | 0 | 0 | 1   |
| ENSP00000470057 | MCM3      | 77   | 0 | 0 | 0 | 0 | 0 | 1   |
| ENSP00000470861 | FLNA      | 604  | 0 | 0 | 0 | 0 | 0 | 1   |
| ENSP00000471018 | NAPA      | 137  | 0 | 0 | 0 | 0 | 0 | 1   |
| ENSP00000471403 | GTF2F1    | 381  | 0 | 0 | 0 | 0 | 0 | 1   |
| ENSP00000471468 | NUDT10    | 164  | 0 | 0 | 0 | 0 | 0 | 1   |
| ENSP00000471720 | BLVRB     | 163  | 0 | 0 | 0 | 0 | 0 | 1   |
| ENSP00000471874 | RPS11     | 88   | 0 | 0 | 0 | 0 | 0 | 1   |
| ENSP00000473537 | C10orf131 | 61   | 0 | 0 | 0 | 0 | 0 | 1   |
| ENSP00000474063 | AP2B1     | 63   | 0 | 0 | 0 | 0 | 0 | 1   |
| ENSP00000474567 | TEX22     | 63   | 0 | 0 | 0 | 0 | 0 | 1   |
| ENSP00000474893 | C17orf66  | 340  | 0 | 0 | 0 | 0 | 0 | 1   |
| ENSP00000475098 | HNRNPK    | 77   | 0 | 0 | 0 | 0 | 0 | 1   |
| ENSP00000477059 | XKR7      | 579  | 0 | 0 | 0 | 0 | 0 | 1   |
| ENSP00000477243 | TFPT      | 253  | 0 | 0 | 0 | 0 | 0 | 1   |

**Supplementary table S2.** A table of differentially expressed proteins in NBE-MSC-MV.

| Protein ID      | LogFold Change | FDR      | Gene Symbol | Description                                                                                                           |
|-----------------|----------------|----------|-------------|-----------------------------------------------------------------------------------------------------------------------|
| ENSP00000261205 | 5.005          | 0        | SYT1        | synaptotagmin I [Source:HGNC Symbol;Acc:11509]                                                                        |
| ENSP00000302397 | 4.869          | 0        | ATP1A3      | ATPase, Na <sup>+</sup> /K <sup>+</sup> transporting, alpha 3 polypeptide [Source:HGNC Symbol;Acc:801]                |
| ENSP00000305152 | 4.644          | 0        | PLP1        | proteolipid protein 1 [Source:HGNC Symbol;Acc:9086]                                                                   |
| ENSP00000345680 | 4.225          | 0        | DNM1        | dynamin 1 [Source:HGNC Symbol;Acc:2972]                                                                               |
| ENSP00000454728 | 4.088          | 0        | GNAO1       | guanine nucleotide binding protein (G protein), alpha activating activity polypeptide O [Source:HGNC Symbol;Acc:4389] |
| ENSP00000295987 | 4.075          | 0        | SYN1        | synapsin I [Source:HGNC Symbol;Acc:11494]                                                                             |
| ENSP00000455899 | 4.05           | 0        | STX1B       | syntaxin 1B [Source:HGNC Symbol;Acc:18539]                                                                            |
| ENSP00000419225 | 4.049          | 0        | DNM1        | dynamin 1 [Source:HGNC Symbol;Acc:2972]                                                                               |
| ENSP00000362396 | 4.049          | 0        | STXBP1      | syntaxin binding protein 1 [Source:HGNC Symbol;Acc:11444]                                                             |
| ENSP00000469129 | 4.048          | 0        | ATP1A3      | ATPase, Na <sup>+</sup> /K <sup>+</sup> transporting, alpha 3 polypeptide [Source:HGNC Symbol;Acc:801]                |
| ENSP00000215095 | 4.036          | 0        | STX1B       | syntaxin 1B [Source:HGNC Symbol;Acc:18539]                                                                            |
| ENSP00000264071 | 3.926          | 0        | TUBB4A      | tubulin, beta 4A class IVa [Source:HGNC Symbol;Acc:20774]                                                             |
| ENSP00000342951 | 3.817          | 0        | ATP6V0A1    | ATPase, H <sup>+</sup> transporting, lysosomal V0 subunit a1 [Source:HGNC Symbol;Acc:865]                             |
| ENSP00000216254 | 3.765          | 0        | ACO2        | aconitase 2, mitochondrial [Source:HGNC Symbol;Acc:118]                                                               |
| ENSP00000225282 | 3.698          | 0        | NSF         | N-ethylmaleimide-sensitive factor [Source:HGNC Symbol;Acc:8016]                                                       |
| ENSP00000396061 | 3.654          | 0        | TUBA4A      | tubulin, alpha 4a [Source:HGNC Symbol;Acc:12407]                                                                      |
| ENSP00000261160 | 3.638          | 0        | CNTN1       | contactin 1 [Source:HGNC Symbol;Acc:2171]                                                                             |
| ENSP00000264649 | 3.63           | 0        | ATP6V0A1    | ATPase, H <sup>+</sup> transporting, lysosomal V0 subunit a1 [Source:HGNC Symbol;Acc:865]                             |
| ENSP00000302777 | 3.626          | 0        | TUBB3       | Tubulin beta-3 chain [Source:UniProtKB/Swiss-Prot;Acc:Q13509]                                                         |
| ENSP00000254976 | 3.582          | 0        | SNAP25      | synaptosomal-associated protein, 25kDa [Source:HGNC Symbol;Acc:11132]                                                 |
| ENSP00000380104 | 3.553          | 0        | HBE1        | hemoglobin, epsilon 1 [Source:HGNC Symbol;Acc:4830]                                                                   |
| ENSP00000354490 | 3.518          | 0        | ATP1A2      | ATPase, Na <sup>+</sup> /K <sup>+</sup> transporting, alpha 2 polypeptide [Source:HGNC Symbol;Acc:800]                |
| ENSP00000381293 | 3.5            | 0        | NSF         | N-ethylmaleimide-sensitive factor [Source:HGNC Symbol;Acc:8016]                                                       |
| ENSP00000476705 | 3.495          | 0        | ATP1A3      | ATPase, Na <sup>+</sup> /K <sup>+</sup> transporting, alpha 3 polypeptide [Source:HGNC Symbol;Acc:801]                |
| ENSP00000307341 | 3.481          | 0        | SNAP25      | synaptosomal-associated protein, 25kDa [Source:HGNC Symbol;Acc:11132]                                                 |
| ENSP00000222286 | 3.464          | 0        | GAPDHS      | glyceraldehyde-3-phosphate dehydrogenase, spermatogenic [Source:HGNC Symbol;Acc:24864]                                |
| ENSP00000299198 | 3.449          | 0        | CKB         | creatine kinase, brain [Source:HGNC Symbol;Acc:1991]                                                                  |
| ENSP00000292896 | 3.442          | 0        | HBE1        | hemoglobin, epsilon 1 [Source:HGNC Symbol;Acc:4830]                                                                   |
| ENSP00000462223 | 3.442          | 0        | MBP         | myelin basic protein [Source:HGNC Symbol;Acc:6925]                                                                    |
| ENSP00000356787 | 3.42           | 0        | ATP1B1      | ATPase, Na <sup>+</sup> /K <sup>+</sup> transporting, beta 1 polypeptide [Source:HGNC Symbol;Acc:804]                 |
| ENSP00000356789 | 3.364          | 0        | ATP1B1      | ATPase, Na <sup>+</sup> /K <sup>+</sup> transporting, beta 1 polypeptide [Source:HGNC Symbol;Acc:804]                 |
| ENSP00000449415 | 3.343          | 0        | SYT1        | synaptotagmin I [Source:HGNC Symbol;Acc:11509]                                                                        |
| ENSP00000348394 | 3.333          | 0.000001 | NCDN        | neurochondrin [Source:HGNC Symbol;Acc:17597]                                                                          |
| ENSP00000362340 | 3.327          | 0        | NCDN        | neurochondrin [Source:HGNC Symbol;Acc:17597]                                                                          |
| ENSP00000311186 | 3.275          | 0        | ATP2A2      | ATPase, Ca <sup>++</sup> transporting, cardiac muscle, slow twitch 2 [Source:HGNC Symbol;Acc:812]                     |
| ENSP00000218548 | 3.268          | 0        | ATP12A      | ATPase, H <sup>+</sup> /K <sup>+</sup> transporting, nongastric, alpha polypeptide [Source:HGNC Symbol;Acc:13816]     |
| ENSP00000222256 | 3.261          | 0        | RAB3A       | RAB3A, member RAS oncogene family [Source:HGNC Symbol;Acc:9777]                                                       |
| ENSP00000318472 | 3.251          | 0        | NCAM1       | neural cell adhesion molecule 1 [Source:HGNC Symbol;Acc:7656]                                                         |
| ENSP00000466696 | 3.242          | 0        | NCAM1       | neural cell adhesion molecule 1 [Source:HGNC Symbol;Acc:7656]                                                         |
| ENSP00000259818 | 3.231          | 0        | TUBB2B      | tubulin, beta 2B class IIb [Source:HGNC Symbol;Acc:30829]                                                             |
| ENSP00000262493 | 3.223          | 0        | GNAO1       | guanine nucleotide binding protein (G protein), alpha activating activity polypeptide O [Source:HGNC Symbol;Acc:4389] |
| ENSP00000421578 | 3.209          | 0        | GPM6A       | glycoprotein M6A [Source:HGNC Symbol;Acc:4460]                                                                        |
| ENSP00000262494 | 3.204          | 0        | GNAO1       | guanine nucleotide binding protein (G protein), alpha activating activity polypeptide O [Source:HGNC Symbol;Acc:4389] |
| ENSP00000405750 | 3.185          | 0        | PLP1        | proteolipid protein 1 [Source:HGNC Symbol;Acc:9086]                                                                   |
| ENSP00000222812 | 3.165          | 0        | STX1A       | syntaxin 1A (brain) [Source:HGNC Symbol;Acc:11433]                                                                    |
| ENSP00000362399 | 3.164          | 0        | STXBP1      | syntaxin binding protein 1 [Source:HGNC Symbol;Acc:11444]                                                             |
| ENSP00000292901 | 3.145          | 0        | HBD         | hemoglobin, delta [Source:HGNC Symbol;Acc:4829]                                                                       |
| ENSP00000380267 | 3.131          | 0        | ATP2B2      | ATPase, Ca <sup>++</sup> transporting, plasma membrane 2 [Source:HGNC Symbol;Acc:815]                                 |
| ENSP00000451617 | 3.106          | 0        | TUBB3       | Tubulin beta-3 chain [Source:UniProtKB/Swiss-Prot;Acc:Q13509]                                                         |
| ENSP00000382981 | 3.063          | 0        | EPB41L3     | erythrocyte membrane protein band 4.1-like 3 [Source:HGNC Symbol;Acc:3380]                                            |
| ENSP00000340716 | 3.051          | 0.000041 | RTN1        | reticulon 1 [Source:HGNC Symbol;Acc:10467]                                                                            |
| ENSP00000429701 | 3.043          | 0        | DNM3        | dynamin 3 [Source:HGNC Symbol;Acc:29125]                                                                              |
| ENSP00000341138 | 3.039          | 0        | EPB41L3     | erythrocyte membrane protein band 4.1-like 3 [Source:HGNC Symbol;Acc:3380]                                            |
| ENSP00000222120 | 3.037          | 0        | RAB3D       | RAB3D, member RAS oncogene family [Source:HGNC Symbol;Acc:9779]                                                       |
| ENSP00000375938 | 3.019          | 0        | TUBA4A      | tubulin, alpha 4a [Source:HGNC Symbol;Acc:12407]                                                                      |
| ENSP00000369602 | 2.983          | 0        | HBG2        | hemoglobin, gamma G [Source:HGNC Symbol;Acc:4832]                                                                     |
| ENSP00000253413 | 2.981          | 0        | ATP6V1E1    | ATPase, H <sup>+</sup> transporting, lysosomal 31kDa, V1 subunit E1 [Source:HGNC Symbol;Acc:857]                      |
| ENSP00000387694 | 2.968          | 0        | SLC12A5     | solute carrier family 12 (potassium/chloride transporter), member 5 [Source:HGNC Symbol;Acc:13818]                    |

|                 |       |          |               |                                                                                                              |
|-----------------|-------|----------|---------------|--------------------------------------------------------------------------------------------------------------|
| ENSP00000243964 | 2.93  | 0        | SLC12A5       | solute carrier family 12 (potassium/chloride transporter), member 5 [Source:HGNC Symbol;Acc:13818]           |
| ENSP00000357060 | 2.911 | 0        | ATP1A4        | ATPase, Na <sup>+</sup> /K <sup>+</sup> transporting, alpha 4 polypeptide [Source:HGNC Symbol;Acc:14073]     |
| ENSP00000400720 | 2.899 | 0        | SNAP25        | synaptosomal-associated protein, 25kDa [Source:HGNC Symbol;Acc:11132]                                        |
| ENSP00000471581 | 2.882 | 0        | ATP1A3        | ATPase, Na <sup>+</sup> /K <sup>+</sup> transporting, alpha 3 polypeptide [Source:HGNC Symbol;Acc:801]       |
| ENSP00000369654 | 2.877 | 0        | HBD           | hemoglobin, delta [Source:HGNC Symbol;Acc:4829]                                                              |
| ENSP00000278379 | 2.842 | 0.000001 | SLC1A2        | solute carrier family 1 (glial high affinity glutamate transporter), member 2 [Source:HGNC Symbol;Acc:10940] |
| ENSP00000470571 | 2.841 | 0        | SYP           | synaptophysin [Source:HGNC Symbol;Acc:11506]                                                                 |
| ENSP00000280187 | 2.811 | 0        | GPM6A         | glycoprotein M6A [Source:HGNC Symbol;Acc:4460]                                                               |
| ENSP00000354111 | 2.765 | 0        | DNAJC5        | DnaJ (Hsp40) homolog, subfamily C, member 5 [Source:HGNC Symbol;Acc:16235]                                   |
| ENSP00000380987 | 2.762 | 0        | CRMP1         | collapsin response mediator protein 1 [Source:HGNC Symbol;Acc:2365]                                          |
| ENSP00000436029 | 2.76  | 0.000033 | SLC1A2        | solute carrier family 1 (glial high affinity glutamate transporter), member 2 [Source:HGNC Symbol;Acc:10940] |
| ENSP00000328455 | 2.756 | 0        | LSAMP         | limbic system-associated membrane protein [Source:HGNC Symbol;Acc:6705]                                      |
| ENSP00000258682 | 2.754 | 0        | CAMK2B        | calcium/calmodulin-dependent protein kinase II beta [Source:HGNC Symbol;Acc:1461]                            |
| ENSP00000322234 | 2.743 | 0.000004 | SYNJ1         | synaptotjanin 1 [Source:HGNC Symbol;Acc:11503]                                                               |
| ENSP00000251595 | 2.738 | 0        | HBA2          | hemoglobin, alpha 2 [Source:HGNC Symbol;Acc:4824]                                                            |
| ENSP00000299518 | 2.725 | 0        | IDH3A         | isocitrate dehydrogenase 3 (NAD <sup>+</sup> ) alpha [Source:HGNC Symbol;Acc:5384]                           |
| ENSP00000261793 | 2.717 | 0        | CAMK2A        | calcium/calmodulin-dependent protein kinase II alpha [Source:HGNC Symbol;Acc:1460]                           |
| ENSP00000273398 | 2.714 | 0        | ATP6V1A       | ATPase, H <sup>+</sup> transporting, lysosomal 70kDa, V1 subunit A [Source:HGNC Symbol;Acc:851]              |
| ENSP00000309539 | 2.7   | 0        | DPYSL2        | dihydropyrimidinase-like 2 [Source:HGNC Symbol;Acc:3014]                                                     |
| ENSP00000448653 | 2.698 | 0.000002 | CNTN1         | contactin 1 [Source:HGNC Symbol;Acc:2171]                                                                    |
| ENSP00000324804 | 2.682 | 0        | PPP2R1A       | protein phosphatase 2, regulatory subunit A, alpha [Source:HGNC Symbol;Acc:9302]                             |
| ENSP00000324172 | 2.652 | 0        | ATP2B2        | ATPase, Ca <sup>++</sup> transporting, plasma membrane 2 [Source:HGNC Symbol;Acc:815]                        |
| ENSP00000369703 | 2.647 | 0        | TUBB2A        | tubulin, beta 2A class IIa [Source:HGNC Symbol;Acc:12412]                                                    |
| ENSP00000348273 | 2.644 | 0        | MBP           | myelin basic protein [Source:HGNC Symbol;Acc:6925]                                                           |
| ENSP00000385447 | 2.644 | 0.000026 | SYNGR1        | synaptogyrin 1 [Source:HGNC Symbol;Acc:11498]                                                                |
| ENSP00000382696 | 2.605 | 0.000001 | ATP6V1E1      | ATPase, H <sup>+</sup> transporting, lysosomal 31kDa, V1 subunit E1 [Source:HGNC Symbol;Acc:857]             |
| ENSP00000358211 | 2.598 | 0        | HSPA12A       | heat shock 70kDa protein 12A [Source:HGNC Symbol;Acc:19022]                                                  |
| ENSP00000452166 | 2.595 | 0.000001 | TUBB3         | Tubulin beta-3 chain [Source:UniProtKB/Swiss-Prot;Acc:Q13509]                                                |
| ENSP00000463016 | 2.584 | 0        | SV2A          | synaptic vesicle glycoprotein 2A [Source:HGNC Symbol;Acc:20566]                                              |
| ENSP00000217133 | 2.584 | 0        | TUBB1         | tubulin, beta 1 class VI [Source:HGNC Symbol;Acc:16257]                                                      |
| ENSP00000343206 | 2.577 | 0.000001 | SYN1          | synapsin 1 [Source:HGNC Symbol;Acc:11494]                                                                    |
| ENSP00000267484 | 2.572 | 0.000001 | RTN1          | reticulon 1 [Source:HGNC Symbol;Acc:10467]                                                                   |
| ENSP00000353174 | 2.554 | 0.000002 | RYR2          | ryanodine receptor 2 (cardiac) [Source:HGNC Symbol;Acc:10484]                                                |
| ENSP00000434744 | 2.553 | 0        | DNAJC5        | DnaJ (Hsp40) homolog, subfamily C, member 5 [Source:HGNC Symbol;Acc:16235]                                   |
| ENSP00000351155 | 2.55  | 0.000021 | ATL1          | atlastin GTPase 1 [Source:HGNC Symbol;Acc:11231]                                                             |
| ENSP00000458221 | 2.548 | 0.000006 | NSF           | N-ethylmaleimide-sensitive factor [Source:HGNC Symbol;Acc:8016]                                              |
| ENSP00000322421 | 2.541 | 0.000004 | HBA1          | hemoglobin, alpha 1 [Source:HGNC Symbol;Acc:4823]                                                            |
| ENSP00000341289 | 2.541 | 0        | TUBB4B        | tubulin, beta 4B class IVb [Source:HGNC Symbol;Acc:20771]                                                    |
| ENSP00000301387 | 2.537 | 0        | ATP2A3        | ATPase, Ca <sup>++</sup> transporting, ubiquitous [Source:HGNC Symbol;Acc:813]                               |
| ENSP00000318697 | 2.513 | 0        | TUBB6         | tubulin, beta 6 class V [Source:HGNC Symbol;Acc:20776]                                                       |
| ENSP00000465154 | 2.502 | 0.000024 | NCAM1         | neural cell adhesion molecule 1 [Source:HGNC Symbol;Acc:7656]                                                |
| ENSP00000379769 | 2.493 | 0        | ACO2          | aconitase 2, mitochondrial [Source:HGNC Symbol;Acc:118]                                                      |
| ENSP00000309431 | 2.489 | 0.000011 | RP11-683L23.1 | Tubulin beta-8 chain-like protein LOC260334 [Source:UniProtKB/Swiss-Prot;Acc:A6NNZ2]                         |
| ENSP00000477015 | 2.466 | 0.000004 | ATP1B1        | ATPase, Na <sup>+</sup> /K <sup>+</sup> transporting, beta 1 polypeptide [Source:HGNC Symbol;Acc:804]        |
| ENSP00000358141 | 2.465 | 0.000011 | SV2A          | synaptic vesicle glycoprotein 2A [Source:HGNC Symbol;Acc:20566]                                              |
| ENSP00000472335 | 2.456 | 0.000005 | RAB3A         | RAB3A, member RAS oncogene family [Source:HGNC Symbol;Acc:9777]                                              |
| ENSP00000459646 | 2.452 | 0.000004 | NSF           | N-ethylmaleimide-sensitive factor [Source:HGNC Symbol;Acc:8016]                                              |
| ENSP00000362413 | 2.451 | 0        | PGK1          | phosphoglycerate kinase 1 [Source:HGNC Symbol;Acc:8896]                                                      |
| ENSP00000451378 | 2.438 | 0.000012 | TUBB3         | Tubulin beta-3 chain [Source:UniProtKB/Swiss-Prot;Acc:Q13509]                                                |
| ENSP00000347359 | 2.428 | 0.000048 | ATP6V1H       | ATPase, H <sup>+</sup> transporting, lysosomal 50/57kDa, V1 subunit H [Source:HGNC Symbol;Acc:18303]         |
| ENSP00000276390 | 2.426 | 0        | ATP6V1B2      | ATPase, H <sup>+</sup> transporting, lysosomal 56/58kDa, V1 subunit B2 [Source:HGNC Symbol;Acc:854]          |
| ENSP00000346522 | 2.419 | 0.00018  | ATL1          | atlastin GTPase 1 [Source:HGNC Symbol;Acc:11231]                                                             |
| ENSP00000439874 | 2.413 | 0.000038 | ATP6V1A       | ATPase, H <sup>+</sup> transporting, lysosomal 70kDa, V1 subunit A [Source:HGNC Symbol;Acc:851]              |
| ENSP00000411705 | 2.405 | 0        | ATP1A2        | ATPase, Na <sup>+</sup> /K <sup>+</sup> transporting, alpha 2 polypeptide [Source:HGNC Symbol;Acc:800]       |
| ENSP00000352398 | 2.403 | 0.000007 | HK1           | hexokinase 1 [Source:HGNC Symbol;Acc:4922]                                                                   |
| ENSP00000262623 | 2.394 | 0        | ATP4A         | ATPase, H <sup>+</sup> /K <sup>+</sup> exchanging, alpha polypeptide [Source:HGNC Symbol;Acc:819]            |
| ENSP00000413649 | 2.393 | 0.000036 | SYNJ1         | synaptotjanin 1 [Source:HGNC Symbol;Acc:11503]                                                               |
| ENSP00000447006 | 2.39  | 0.000001 | CNTN1         | contactin 1 [Source:HGNC Symbol;Acc:2171]                                                                    |
| ENSP00000316861 | 2.366 | 0.00001  | GPM6B         | glycoprotein M6B [Source:HGNC Symbol;Acc:4461]                                                               |
| ENSP00000381412 | 2.365 | 0.000077 | CAMK2A        | calcium/calmodulin-dependent protein kinase II alpha [Source:HGNC Symbol;Acc:1460]                           |
| ENSP00000386192 | 2.358 | 0.000012 | DNM2          | dynamin 2 [Source:HGNC Symbol;Acc:2974]                                                                      |

|                 |       |          |          |                                                                                                                       |
|-----------------|-------|----------|----------|-----------------------------------------------------------------------------------------------------------------------|
| ENSP00000321606 | 2.353 | 0.000311 | CRMP1    | collapsin response mediator protein 1 [Source:HGNC Symbol;Acc:2365]                                                   |
| ENSP00000320295 | 2.353 | 0.000023 | TUBB3    | Tubulin beta-3 chain [Source:UniProtKB/Swiss-Prot;Acc:Q13509]                                                         |
| ENSP00000398320 | 2.348 | 0.00038  | GLUL     | glutamate-ammonia ligase [Source:HGNC Symbol;Acc:4341]                                                                |
| ENSP00000387506 | 2.335 | 0.000024 | IDH3A    | isocitrate dehydrogenase 3 (NAD+) alpha [Source:HGNC Symbol;Acc:5384]                                                 |
| ENSP00000362350 | 2.328 | 0.000079 | NCDN     | neurochondrin [Source:HGNC Symbol;Acc:17597]                                                                          |
| ENSP00000450538 | 2.321 | 0.000145 | TUBB3    | Tubulin beta-3 chain [Source:UniProtKB/Swiss-Prot;Acc:Q13509]                                                         |
| ENSP00000455774 | 2.319 | 0.000015 | GNAO1    | guanine nucleotide binding protein (G protein), alpha activating activity polypeptide O [Source:HGNC Symbol;Acc:4389] |
| ENSP00000403335 | 2.319 | 0.000002 | PLP1     | proteolipid protein 1 [Source:HGNC Symbol;Acc:9086]                                                                   |
| ENSP00000467399 | 2.317 | 0        | VAMP2    | vesicle-associated membrane protein 2 (synaptobrevin 2) [Source:HGNC Symbol;Acc:12643]                                |
| ENSP00000283269 | 2.304 | 0.000061 | CADPS    | Ca++-dependent secretion activator [Source:HGNC Symbol;Acc:1426]                                                      |
| ENSP00000472481 | 2.304 | 0        | TUBB4A   | tubulin, beta 4A class IVa [Source:HGNC Symbol;Acc:20774]                                                             |
| ENSP00000379099 | 2.302 | 0.000021 | SLC1A2   | solute carrier family 1 (glial high affinity glutamate transporter), member 2 [Source:HGNC Symbol;Acc:10940]          |
| ENSP00000356236 | 2.301 | 0.000105 | SYT2     | synaptotagmin II [Source:HGNC Symbol;Acc:11510]                                                                       |
| ENSP00000366225 | 2.296 | 0.000102 | NAPB     | N-ethylmaleimide-sensitive factor attachment protein, beta [Source:HGNC Symbol;Acc:15751]                             |
| ENSP00000449426 | 2.293 | 0.000019 | PFKM     | phosphofructokinase, muscle [Source:HGNC Symbol;Acc:8877]                                                             |
| ENSP00000418799 | 2.284 | 0        | TUBAL3   | tubulin, alpha-like 3 [Source:HGNC Symbol;Acc:23534]                                                                  |
| ENSP00000290949 | 2.269 | 0        | ATP6V0D1 | ATPase, H+ transporting, lysosomal 38kDa, V0 subunit d1 [Source:HGNC Symbol;Acc:13724]                                |
| ENSP00000346545 | 2.268 | 0.000079 | MBP      | myelin basic protein [Source:HGNC Symbol;Acc:6925]                                                                    |
| ENSP00000378872 | 2.267 | 0.000617 | ATP2A2   | ATPase, Ca++ transporting, cardiac muscle, slow twitch 2 [Source:HGNC Symbol;Acc:812]                                 |
| ENSP00000468571 | 2.267 | 0.0002   | TUBB6    | tubulin, beta 6 class V [Source:HGNC Symbol;Acc:20776]                                                                |
| ENSP00000384014 | 2.244 | 0.000431 | VSNL1    | visinin-like 1 [Source:HGNC Symbol;Acc:12722]                                                                         |
| ENSP00000268251 | 2.243 | 0.000213 | ABAT     | 4-aminobutyrate aminotransferase [Source:HGNC Symbol;Acc:23]                                                          |
| ENSP00000318845 | 2.24  | 0.000182 | SYNGR1   | synaptogyrin 1 [Source:HGNC Symbol;Acc:11498]                                                                         |
| ENSP00000427985 | 2.21  | 0        | DPYSL2   | dihydropyrimidinase-like 2 [Source:HGNC Symbol;Acc:3014]                                                              |
| ENSP00000342056 | 2.202 | 0.000223 | CS       | citrate synthase [Source:HGNC Symbol;Acc:2422]                                                                        |
| ENSP00000313164 | 2.199 | 0.000134 | DNM2     | dynamin 2 [Source:HGNC Symbol;Acc:2974]                                                                               |
| ENSP00000298649 | 2.188 | 0.000265 | HK1      | hexokinase 1 [Source:HGNC Symbol;Acc:4922]                                                                            |
| ENSP00000451560 | 2.185 | 0.000572 | TUBB3    | tubulin, beta 3 class III [Source:HGNC Symbol;Acc:20772]                                                              |
| ENSP00000411916 | 2.182 | 0.000426 | ABAT     | 4-aminobutyrate aminotransferase [Source:HGNC Symbol;Acc:23]                                                          |
| ENSP00000378729 | 2.182 | 0        | ALDOC    | aldolase C, fructose-bisphosphate [Source:HGNC Symbol;Acc:418]                                                        |
| ENSP00000248437 | 2.165 | 0        | TUBA4A   | tubulin, alpha 4a [Source:HGNC Symbol;Acc:12407]                                                                      |
| ENSP00000376066 | 2.163 | 0.000219 | ATP1A2   | ATPase, Na+/K+ transporting, alpha 2 polypeptide [Source:HGNC Symbol;Acc:800]                                         |
| ENSP00000404740 | 2.161 | 0.00048  | TUBA4A   | tubulin, alpha 4a [Source:HGNC Symbol;Acc:12407]                                                                      |
| ENSP00000440874 | 2.159 | 0        | RTN3     | reticulon 3 [Source:HGNC Symbol;Acc:10469]                                                                            |
| ENSP00000465623 | 2.156 | 0.000263 | ALDOC    | aldolase C, fructose-bisphosphate [Source:HGNC Symbol;Acc:418]                                                        |
| ENSP00000429947 | 2.156 | 0.000086 | ATP6V1H  | ATPase, H+ transporting, lysosomal 50/57kDa, V1 subunit H [Source:HGNC Symbol;Acc:18303]                              |
| ENSP00000282878 | 2.139 | 0.000366 | RAB3C    | RAB3C, member RAS oncogene family [Source:HGNC Symbol;Acc:30269]                                                      |
| ENSP00000264449 | 2.138 | 0.001093 | ATP8A1   | ATPase, aminophospholipid transporter (APLT), class I, type 8A, member 1 [Source:HGNC Symbol;Acc:13531]               |
| ENSP00000309438 | 2.138 | 0.002952 | PFKM     | phosphofructokinase, muscle [Source:HGNC Symbol;Acc:8877]                                                             |
| ENSP00000463328 | 2.133 | 0        | ATP6V0D1 | ATPase, H+ transporting, lysosomal 38kDa, V0 subunit d1 [Source:HGNC Symbol;Acc:13724]                                |
| ENSP00000376932 | 2.12  | 0.000109 | SYT1     | synaptotagmin I [Source:HGNC Symbol;Acc:11509]                                                                        |
| ENSP00000277865 | 2.117 | 0.000967 | GLUD1    | glutamate dehydrogenase 1 [Source:HGNC Symbol;Acc:4335]                                                               |
| ENSP00000336850 | 2.097 | 0        | RAB6A    | RAB6A, member RAS oncogene family [Source:HGNC Symbol;Acc:9786]                                                       |
| ENSP00000470627 | 2.094 | 0.000318 | TUBB4A   | tubulin, beta 4A class IVa [Source:HGNC Symbol;Acc:20774]                                                             |
| ENSP00000333994 | 2.087 | 0.000027 | HBB      | hemoglobin, beta [Source:HGNC Symbol;Acc:4827]                                                                        |
| ENSP00000382982 | 2.075 | 0        | TUBA3C   | tubulin, alpha 3c [Source:HGNC Symbol;Acc:12408]                                                                      |
| ENSP00000295156 | 2.069 | 0.002282 | VSNL1    | visinin-like 1 [Source:HGNC Symbol;Acc:12722]                                                                         |
| ENSP00000470986 | 2.065 | 0        | PGK1     | phosphoglycerate kinase 1 [Source:HGNC Symbol;Acc:8896]                                                               |
| ENSP00000450268 | 2.064 | 0        | TUBA1A   | tubulin, alpha 1a [Source:HGNC Symbol;Acc:20766]                                                                      |
| ENSP00000419921 | 2.058 | 0.001039 | GPM6B    | glycoprotein M6B [Source:HGNC Symbol;Acc:4461]                                                                        |
| ENSP00000263233 | 2.05  | 0.007799 | SYP      | synaptophysin [Source:HGNC Symbol;Acc:11506]                                                                          |
| ENSP00000449748 | 2.049 | 0        | TUBA1B   | tubulin, alpha 1b [Source:HGNC Symbol;Acc:18809]                                                                      |
| ENSP00000406473 | 2.045 | 0.001256 | PDHA1    | pyruvate dehydrogenase (lipoamide) alpha 1 [Source:HGNC Symbol;Acc:8806]                                              |
| ENSP00000376174 | 2.045 | 0.001258 | RAN      | RAN, member RAS oncogene family [Source:HGNC Symbol;Acc:9846]                                                         |
| ENSP00000356237 | 2.043 | 0.000809 | SYT2     | synaptotagmin II [Source:HGNC Symbol;Acc:11510]                                                                       |
| ENSP00000348062 | 2.041 | 0.00284  | PDHA1    | pyruvate dehydrogenase (lipoamide) alpha 1 [Source:HGNC Symbol;Acc:8806]                                              |
| ENSP00000380899 | 2.037 | 0.000423 | HBA1     | hemoglobin, alpha 1 [Source:HGNC Symbol;Acc:4823]                                                                     |
| ENSP00000324105 | 2.035 | 0.001934 | ENO3     | enolase 3 (beta, muscle) [Source:HGNC Symbol;Acc:3354]                                                                |
| ENSP00000313567 | 2.033 | 0.000007 | CYFIP2   | cytoplasmic FMR1 interacting protein 2 [Source:HGNC Symbol;Acc:13760]                                                 |
| ENSP00000410829 | 2.028 | 0.001829 | TUBB     | tubulin, beta class I [Source:HGNC Symbol;Acc:20778]                                                                  |
| ENSP00000471490 | 2.024 | 0.001326 | ENO2     | enolase 2 (gamma, neuronal) [Source:HGNC Symbol;Acc:3353]                                                             |

|                 |       |          |          |                                                                                                                       |
|-----------------|-------|----------|----------|-----------------------------------------------------------------------------------------------------------------------|
| ENSP00000340903 | 2.022 | 0.000166 | RTN3     | reticulon 3 [Source:HGNC Symbol;Acc:10469]                                                                            |
| ENSP00000457610 | 2.018 | 0.001334 | TUBB8    | tubulin, beta 8 class VIII [Source:HGNC Symbol;Acc:20773]                                                             |
| ENSP00000477306 | 1.989 | 0        | TUBA8    | tubulin, alpha 8 [Source:HGNC Symbol;Acc:12410]                                                                       |
| ENSP00000354451 | 1.984 | 0.001359 | IQGAP3   | IQ motif containing GTPase activating protein 3 [Source:HGNC Symbol;Acc:20669]                                        |
| ENSP00000452001 | 1.979 | 0.002354 | TUBB3    | Tubulin beta-3 chain [Source:UniProtKB/Swiss-Prot;Acc:Q13509]                                                         |
| ENSP00000476090 | 1.976 | 0.003964 | BASP1    | brain abundant, membrane attached signal protein 1 [Source:HGNC Symbol;Acc:957]                                       |
| ENSP00000430682 | 1.968 | 0.000083 | ATP6V1B2 | ATPase, H+ transporting, lysosomal 56/58kDa, V1 subunit B2 [Source:HGNC Symbol;Acc:854]                               |
| ENSP00000226253 | 1.967 | 0        | ALDOC    | aldolase C, fructose-bisphosphate [Source:HGNC Symbol;Acc:418]                                                        |
| ENSP00000399685 | 1.958 | 0.00097  | SEPT5    | septin 5 [Source:HGNC Symbol;Acc:9164]                                                                                |
| ENSP00000307900 | 1.948 | 0.007091 | GLUL     | glutamate-ammonia ligase [Source:HGNC Symbol;Acc:4341]                                                                |
| ENSP00000305995 | 1.93  | 0        | PGK2     | phosphoglycerate kinase 2 [Source:HGNC Symbol;Acc:8898]                                                               |
| ENSP00000457238 | 1.929 | 0.002006 | GNAO1    | guanine nucleotide binding protein (G protein), alpha activating activity polypeptide O [Source:HGNC Symbol;Acc:4389] |
| ENSP00000391905 | 1.911 | 0.000459 | PPP2R1A  | protein phosphatase 2, regulatory subunit A, alpha [Source:HGNC Symbol;Acc:9302]                                      |
| ENSP00000262030 | 1.91  | 0        | ATP5B    | ATP synthase, H+ transporting, mitochondrial F1 complex, beta polypeptide [Source:HGNC Symbol;Acc:830]                |
| ENSP00000444708 | 1.904 | 0.000033 | PGK1     | phosphoglycerate kinase 1 [Source:HGNC Symbol;Acc:8896]                                                               |
| ENSP00000320580 | 1.89  | 0.003994 | PPP3CA   | protein phosphatase 3, catalytic subunit, alpha isozyme [Source:HGNC Symbol;Acc:9314]                                 |
| ENSP00000382694 | 1.879 | 0.007404 | ATP6V1E1 | ATPase, H+ transporting, lysosomal 31kDa, V1 subunit E1 [Source:HGNC Symbol;Acc:857]                                  |
| ENSP00000340466 | 1.873 | 0.001984 | GANAB    | glucosidase, alpha; neutral AB [Source:HGNC Symbol;Acc:4138]                                                          |
| ENSP00000366650 | 1.872 | 0.000002 | PYGM     | phosphorylase, glycogen, muscle [Source:HGNC Symbol;Acc:9726]                                                         |
| ENSP00000339001 | 1.867 | 0        | TUBB     | tubulin, beta class I [Source:HGNC Symbol;Acc:20778]                                                                  |
| ENSP00000247461 | 1.863 | 0        | CANX     | calnexin [Source:HGNC Symbol;Acc:1473]                                                                                |
| ENSP00000349238 | 1.859 | 0.008366 | CCDC88B  | coiled-coil domain containing 88B [Source:HGNC Symbol;Acc:26757]                                                      |
| ENSP00000307241 | 1.854 | 0.007215 | PDHB     | pyruvate dehydrogenase (lipoamide) beta [Source:HGNC Symbol;Acc:8808]                                                 |
| ENSP00000446130 | 1.852 | 0.001408 | PCBP2    | poly(rC) binding protein 2 [Source:HGNC Symbol;Acc:8648]                                                              |
| ENSP00000054666 | 1.848 | 0        | VAMP3    | vesicle-associated membrane protein 3 [Source:HGNC Symbol;Acc:12644]                                                  |
| ENSP00000427954 | 1.845 | 0.002964 | DPYSL2   | dihydropyrimidinase-like 2 [Source:HGNC Symbol;Acc:3014]                                                              |
| ENSP00000401317 | 1.839 | 0.000003 | TUBB     | tubulin, beta class I [Source:HGNC Symbol;Acc:20778]                                                                  |
| ENSP00000327070 | 1.826 | 0.000002 | MDH2     | malate dehydrogenase 2, NAD (mitochondrial) [Source:HGNC Symbol;Acc:6971]                                             |
| ENSP00000468777 | 1.822 | 0.002244 | TUBB6    | tubulin, beta 6 class V [Source:HGNC Symbol;Acc:20776]                                                                |
| ENSP00000424063 | 1.821 | 0        | CANX     | calnexin [Source:HGNC Symbol;Acc:1473]                                                                                |
| ENSP00000409667 | 1.806 | 0.009891 | SYNJ1    | synaptojanin 1 [Source:HGNC Symbol;Acc:11503]                                                                         |
| ENSP00000431630 | 1.798 | 0        | AP2A2    | adaptor-related protein complex 2, alpha 2 subunit [Source:HGNC Symbol;Acc:562]                                       |
| ENSP00000296402 | 1.787 | 0        | CAMK2D   | calcium/calmodulin-dependent protein kinase II delta [Source:HGNC Symbol;Acc:1462]                                    |
| ENSP00000408649 | 1.77  | 0.000126 | MDH2     | malate dehydrogenase 2, NAD (mitochondrial) [Source:HGNC Symbol;Acc:6971]                                             |
| ENSP00000436603 | 1.766 | 0.001567 | IQGAP3   | IQ motif containing GTPase activating protein 3 [Source:HGNC Symbol;Acc:20669]                                        |
| ENSP00000282050 | 1.759 | 0.000027 | ATP5A1   | ATP synthase, H+ transporting, mitochondrial F1 complex, alpha subunit 1, cardiac muscle [Source:HGNC Symbol;Acc:823] |
| ENSP00000344106 | 1.756 | 0.000001 | RTN3     | reticulon 3 [Source:HGNC Symbol;Acc:10469]                                                                            |
| ENSP00000285208 | 1.736 | 0.003903 | RAB6B    | RAB6B, member RAS oncogene family [Source:HGNC Symbol;Acc:14902]                                                      |
| ENSP00000300289 | 1.725 | 0        | PDIA3    | protein disulfide isomerase family A, member 3 [Source:HGNC Symbol;Acc:4606]                                          |
| ENSP00000450712 | 1.719 | 0.000007 | HSP90AA1 | heat shock protein 90kDa alpha (cytosolic), class A member 1 [Source:HGNC Symbol;Acc:5253]                            |
| ENSP00000403778 | 1.702 | 0.008924 | RAC2     | ras-related C3 botulinum toxin substrate 2 (rho family, small GTP binding protein Rac2) [Source:HGNC Symbol;Acc:9802] |
| ENSP00000438260 | 1.69  | 0        | PDIA3    | protein disulfide isomerase family A, member 3 [Source:HGNC Symbol;Acc:4606]                                          |
| ENSP00000344868 | 1.674 | 0        | SEPT7    | septin 7 [Source:HGNC Symbol;Acc:1717]                                                                                |
| ENSP00000423444 | 1.673 | 0.006902 | MAP1B    | microtubule-associated protein 1B [Source:HGNC Symbol;Acc:6836]                                                       |
| ENSP00000396127 | 1.66  | 0.000001 | RAN      | RAN, member RAS oncogene family [Source:HGNC Symbol;Acc:9846]                                                         |
| ENSP00000296755 | 1.654 | 0.003005 | MAP1B    | microtubule-associated protein 1B [Source:HGNC Symbol;Acc:6836]                                                       |
| ENSP00000446489 | 1.643 | 0        | ATP5B    | ATP synthase, H+ transporting, mitochondrial F1 complex, beta polypeptide [Source:HGNC Symbol;Acc:830]                |
| ENSP00000249071 | 1.634 | 0        | RAC2     | ras-related C3 botulinum toxin substrate 2 (rho family, small GTP binding protein Rac2) [Source:HGNC Symbol;Acc:9802] |
| ENSP00000327694 | 1.632 | 0        | AP2A2    | adaptor-related protein complex 2, alpha 2 subunit [Source:HGNC Symbol;Acc:562]                                       |
| ENSP00000402551 | 1.632 | 0.007464 | OTUB1    | OTU domain, ubiquitin aldehyde binding 1 [Source:HGNC Symbol;Acc:23077]                                               |
| ENSP00000164139 | 1.622 | 0.000863 | PYGM     | phosphorylase, glycogen, muscle [Source:HGNC Symbol;Acc:9726]                                                         |
| ENSP00000273047 | 1.621 | 0.000329 | RAB5A    | RAB5A, member RAS oncogene family [Source:HGNC Symbol;Acc:9783]                                                       |
| ENSP00000431117 | 1.606 | 0.000007 | DPYSL2   | dihydropyrimidinase-like 2 [Source:HGNC Symbol;Acc:3014]                                                              |
| ENSP00000444875 | 1.603 | 0.000001 | TUBA1A   | tubulin, alpha 1a [Source:HGNC Symbol;Acc:20766]                                                                      |
| ENSP00000336799 | 1.574 | 0        | TUBA1B   | tubulin, alpha 1b [Source:HGNC Symbol;Acc:18809]                                                                      |
| ENSP00000229264 | 1.548 | 0.000087 | GNB3     | guanine nucleotide binding protein (G protein), beta polypeptide 3 [Source:HGNC Symbol;Acc:4400]                      |
| ENSP00000324173 | 1.533 | 0        | HSPA5    | heat shock 70kDa protein 5 (glucose-regulated protein, 78kDa) [Source:HGNC Symbol;Acc:5238]                           |
| ENSP00000428009 | 1.479 | 0.000002 | CYFIP2   | cytoplasmic FMR1 interacting protein 2 [Source:HGNC Symbol;Acc:13760]                                                 |
| ENSP00000301071 | 1.479 | 0        | TUBA1A   | tubulin, alpha 1a [Source:HGNC Symbol;Acc:20766]                                                                      |

|                 |       |          |          |                                                                                                                                   |
|-----------------|-------|----------|----------|-----------------------------------------------------------------------------------------------------------------------------------|
| ENSP00000465477 | 1.472 | 0.000095 | ATP5A1   | ATP synthase, H <sup>+</sup> transporting, mitochondrial F1 complex, alpha subunit 1, cardiac muscle [Source:HGNC Symbol;Acc:823] |
| ENSP00000414479 | 1.457 | 0        | TUBB     | tubulin, beta class I [Source:HGNC Symbol;Acc:20778]                                                                              |
| ENSP00000348965 | 1.409 | 0        | DYNC1H1  | dynein, cytoplasmic 1, heavy chain 1 [Source:HGNC Symbol;Acc:2961]                                                                |
| ENSP00000262325 | 1.406 | 0        | AP2B1    | adaptor-related protein complex 2, beta 1 subunit [Source:HGNC Symbol;Acc:563]                                                    |
| ENSP00000475018 | 1.401 | 0.000111 | AP2B1    | adaptor-related protein complex 2, beta 1 subunit [Source:HGNC Symbol;Acc:563]                                                    |
| ENSP00000371894 | 1.395 | 0.002005 | AP2M1    | adaptor-related protein complex 2, mu 1 subunit [Source:HGNC Symbol;Acc:564]                                                      |
| ENSP00000297283 | 1.391 | 0.000002 | PGAM2    | phosphoglycerate mutase 2 (muscle) [Source:HGNC Symbol;Acc:8889]                                                                  |
| ENSP00000295598 | 1.384 | 0        | ATP1A1   | ATPase, Na <sup>+</sup> /K <sup>+</sup> transporting, alpha 1 polypeptide [Source:HGNC Symbol;Acc:799]                            |
| ENSP00000287226 | 1.361 | 0.005666 | NPTN     | neuroplastin [Source:HGNC Symbol;Acc:17867]                                                                                       |
| ENSP00000264893 | 1.353 | 0.002426 | SEPT11   | septin 11 [Source:HGNC Symbol;Acc:25589]                                                                                          |
| ENSP00000269122 | 1.328 | 0        | CLTC     | clathrin, heavy chain (Hc) [Source:HGNC Symbol;Acc:2092]                                                                          |
| ENSP00000227378 | 1.322 | 0        | HSPA8    | heat shock 70kDa protein 8 [Source:HGNC Symbol;Acc:5241]                                                                          |
| ENSP00000400022 | 1.304 | 0.000016 | AP1B1    | adaptor-related protein complex 1, beta 1 subunit [Source:HGNC Symbol;Acc:554]                                                    |
| ENSP00000376763 | 1.292 | 0        | CLTC     | clathrin, heavy chain (Hc) [Source:HGNC Symbol;Acc:2092]                                                                          |
| ENSP00000393340 | 1.285 | 0        | TUBB     | tubulin, beta class I [Source:HGNC Symbol;Acc:20778]                                                                              |
| ENSP00000362946 | 1.255 | 0.001764 | RAB14    | RAB14, member RAS oncogene family [Source:HGNC Symbol;Acc:16524]                                                                  |
| ENSP00000248975 | 1.255 | 0.002949 | YWHAH    | tyrosine 3-monooxygenase/tryptophan 5-monooxygenase activation protein, eta [Source:HGNC Symbol;Acc:12853]                        |
| ENSP00000394071 | 1.233 | 0.003021 | GDI1     | GDP dissociation inhibitor 1 [Source:HGNC Symbol;Acc:4226]                                                                        |
| ENSP00000300161 | 1.224 | 0.000001 | YWHAH    | tyrosine 3-monooxygenase/tryptophan 5-monooxygenase activation protein, beta [Source:HGNC Symbol;Acc:12849]                       |
| ENSP00000229277 | 1.22  | 0.000003 | ENO2     | enolase 2 (gamma, neuronal) [Source:HGNC Symbol;Acc:3353]                                                                         |
| ENSP00000449325 | 1.22  | 0        | TUBA1B   | tubulin, alpha 1b [Source:HGNC Symbol;Acc:18809]                                                                                  |
| ENSP00000258737 | 1.171 | 0.000011 | RAC1     | ras-related C3 botulinum toxin substrate 1 (rho family, small GTP binding protein Rac1) [Source:HGNC Symbol;Acc:9801]             |
| ENSP00000361930 | 1.155 | 0.000729 | YWHAH    | tyrosine 3-monooxygenase/tryptophan 5-monooxygenase activation protein, beta [Source:HGNC Symbol;Acc:12849]                       |
| ENSP00000306330 | 1.142 | 0        | YWHAH    | tyrosine 3-monooxygenase/tryptophan 5-monooxygenase activation protein, gamma [Source:HGNC Symbol;Acc:12852]                      |
| ENSP00000430636 | 1.088 | 0        | ENO3     | enolase 3 (beta, muscle) [Source:HGNC Symbol;Acc:3354]                                                                            |
| ENSP00000359991 | 1.066 | 0.002003 | PGAM1    | phosphoglycerate mutase 1 (brain) [Source:HGNC Symbol;Acc:8888]                                                                   |
| ENSP00000216281 | 1.002 | 0        | HSP90AA1 | heat shock protein 90kDa alpha (cytosolic), class A member 1 [Source:HGNC Symbol;Acc:5253]                                        |
| ENSP00000265062 | 0.984 | 0.000028 | RAB7A    | RAB7A, member RAS oncogene family [Source:HGNC Symbol;Acc:9788]                                                                   |
| ENSP00000396189 | 0.955 | 0.006064 | HSP90AA1 | heat shock protein 90kDa alpha (cytosolic), class A member 1 [Source:HGNC Symbol;Acc:5253]                                        |
| ENSP00000318575 | 0.938 | 0.000858 | TUBA8    | tubulin, alpha 8 [Source:HGNC Symbol;Acc:12410]                                                                                   |
| ENSP00000216962 | 0.928 | 0.000037 | PYGB     | phosphorylase, glycogen; brain [Source:HGNC Symbol;Acc:9723]                                                                      |
| ENSP00000377470 | 0.911 | 0.000012 | CNP      | 2',3'-cyclic nucleotide 3' phosphodiesterase [Source:HGNC Symbol;Acc:2158]                                                        |
| ENSP00000399904 | 0.9   | 0        | GNB2     | guanine nucleotide binding protein (G protein), beta polypeptide 2 [Source:HGNC Symbol;Acc:4398]                                  |
| ENSP00000299767 | 0.873 | 0.000014 | HSP90B1  | heat shock protein 90kDa beta (Grp94), member 1 [Source:HGNC Symbol;Acc:12028]                                                    |
| ENSP00000232564 | 0.865 | 0.000069 | GNB4     | guanine nucleotide binding protein (G protein), beta polypeptide 4 [Source:HGNC Symbol;Acc:20731]                                 |
| ENSP00000290378 | 0.86  | 0.000015 | ACTC1    | actin, alpha, cardiac muscle 1 [Source:HGNC Symbol;Acc:143]                                                                       |
| ENSP00000325875 | 0.848 | 0        | HSP90AB1 | heat shock protein 90kDa alpha (cytosolic), class B member 1 [Source:HGNC Symbol;Acc:5258]                                        |
| ENSP00000264710 | 0.819 | 0.007666 | RAB10    | RAB10, member RAS oncogene family [Source:HGNC Symbol;Acc:9759]                                                                   |
| ENSP00000343599 | 0.789 | 0.000469 | ATP2B1   | ATPase, Ca <sup>++</sup> transporting, plasma membrane 1 [Source:HGNC Symbol;Acc:814]                                             |
| ENSP00000460932 | 0.692 | 0.000022 | ATP2B3   | ATPase, Ca <sup>++</sup> transporting, plasma membrane 3 [Source:HGNC Symbol;Acc:816]                                             |
| ENSP00000358508 | 0.687 | 0        | ATP1A1   | ATPase, Na <sup>+</sup> /K <sup>+</sup> transporting, alpha 1 polypeptide [Source:HGNC Symbol;Acc:799]                            |
| ENSP00000398239 | 0.681 | 0.000006 | ACTA2    | actin, alpha 2, smooth muscle, aorta [Source:HGNC Symbol;Acc:130]                                                                 |
| ENSP00000238081 | 0.629 | 0.001476 | YWHAQ    | tyrosine 3-monooxygenase/tryptophan 5-monooxygenase activation protein, theta [Source:HGNC Symbol;Acc:12854]                      |
| ENSP00000261173 | 0.617 | 0.000115 | ATP2B1   | ATPase, Ca <sup>++</sup> transporting, plasma membrane 1 [Source:HGNC Symbol;Acc:814]                                             |
| ENSP00000217182 | 0.535 | 0.000253 | EEF1A2   | eukaryotic translation elongation factor 1 alpha 2 [Source:HGNC Symbol;Acc:3192]                                                  |
| ENSP00000459119 | 0.517 | 0        | ACTG1    | actin, gamma 1 [Source:HGNC Symbol;Acc:144]                                                                                       |
| ENSP00000224784 | 0.392 | 0.000001 | ACTA2    | actin, alpha 2, smooth muscle, aorta [Source:HGNC Symbol;Acc:130]                                                                 |



**Supplementary table S3.** A table of differentially expressed proteins in SBE-MSC-MV.

| Protein ID      | LogFold Change | FDR | Gene Symbol | Description                                                                                                           |
|-----------------|----------------|-----|-------------|-----------------------------------------------------------------------------------------------------------------------|
| ENSP00000261205 | 5.195          | 0   | SYT1        | synaptotagmin I [Source:HGNC Symbol;Acc:11509]                                                                        |
| ENSP00000345680 | 4.781          | 0   | DNM1        | dynamain 1 [Source:HGNC Symbol;Acc:2972]                                                                              |
| ENSP00000305152 | 4.754          | 0   | PLP1        | proteolipid protein 1 [Source:HGNC Symbol;Acc:9086]                                                                   |
| ENSP00000302397 | 4.746          | 0   | ATP1A3      | ATPase, Na <sup>+</sup> /K <sup>+</sup> transporting, alpha 3 polypeptide [Source:HGNC Symbol;Acc:801]                |
| ENSP00000419225 | 4.271          | 0   | DNM1        | dynamain 1 [Source:HGNC Symbol;Acc:2972]                                                                              |
| ENSP00000216254 | 4.162          | 0   | ACO2        | aconitase 2, mitochondrial [Source:HGNC Symbol;Acc:118]                                                               |
| ENSP00000295987 | 4.071          | 0   | SYN1        | synapsin I [Source:HGNC Symbol;Acc:11494]                                                                             |
| ENSP00000362396 | 4.046          | 0   | STXBP1      | syntaxin binding protein 1 [Source:HGNC Symbol;Acc:11444]                                                             |
| ENSP00000264071 | 3.976          | 0   | TUBB4A      | tubulin, beta 4A class IVa [Source:HGNC Symbol;Acc:20774]                                                             |
| ENSP00000469129 | 3.961          | 0   | ATP1A3      | ATPase, Na <sup>+</sup> /K <sup>+</sup> transporting, alpha 3 polypeptide [Source:HGNC Symbol;Acc:801]                |
| ENSP00000380104 | 3.813          | 0   | HBE1        | hemoglobin, epsilon 1 [Source:HGNC Symbol;Acc:4830]                                                                   |
| ENSP00000292896 | 3.785          | 0   | HBE1        | hemoglobin, epsilon 1 [Source:HGNC Symbol;Acc:4830]                                                                   |
| ENSP00000342951 | 3.768          | 0   | ATP6V0A1    | ATPase, H <sup>+</sup> transporting, lysosomal V0 subunit a1 [Source:HGNC Symbol;Acc:865]                             |
| ENSP00000362340 | 3.764          | 0   | NCDN        | neurochondrin [Source:HGNC Symbol;Acc:17597]                                                                          |
| ENSP00000299198 | 3.754          | 0   | CKB         | creatine kinase, brain [Source:HGNC Symbol;Acc:1991]                                                                  |
| ENSP00000455899 | 3.752          | 0   | STX1B       | syntaxin 1B [Source:HGNC Symbol;Acc:18539]                                                                            |
| ENSP00000261160 | 3.739          | 0   | CNTN1       | contactin 1 [Source:HGNC Symbol;Acc:2171]                                                                             |
| ENSP00000454728 | 3.699          | 0   | GNAO1       | guanine nucleotide binding protein (G protein), alpha activating activity polypeptide O [Source:HGNC Symbol;Acc:4389] |
| ENSP00000225282 | 3.696          | 0   | NSF         | N-ethylmaleimide-sensitive factor [Source:HGNC Symbol;Acc:8016]                                                       |
| ENSP00000222286 | 3.688          | 0   | GAPDHS      | glyceraldehyde-3-phosphate dehydrogenase, spermatogenic [Source:HGNC Symbol;Acc:24864]                                |
| ENSP00000396061 | 3.67           | 0   | TUBA4A      | tubulin, alpha 4a [Source:HGNC Symbol;Acc:12407]                                                                      |
| ENSP00000302777 | 3.662          | 0   | TUBB3       | Tubulin beta-3 chain [Source:UniProtKB/Swiss-Prot;Acc:Q13509]                                                         |
| ENSP00000381293 | 3.59           | 0   | NSF         | N-ethylmaleimide-sensitive factor [Source:HGNC Symbol;Acc:8016]                                                       |
| ENSP00000215095 | 3.524          | 0   | STX1B       | syntaxin 1B [Source:HGNC Symbol;Acc:18539]                                                                            |
| ENSP00000462223 | 3.482          | 0   | MBP         | myelin basic protein [Source:HGNC Symbol;Acc:6925]                                                                    |
| ENSP00000354490 | 3.473          | 0   | ATP1A2      | ATPase, Na <sup>+</sup> /K <sup>+</sup> transporting, alpha 2 polypeptide [Source:HGNC Symbol;Acc:800]                |
| ENSP00000264649 | 3.469          | 0   | ATP6V0A1    | ATPase, H <sup>+</sup> transporting, lysosomal V0 subunit a1 [Source:HGNC Symbol;Acc:865]                             |
| ENSP00000429701 | 3.465          | 0   | DNM3        | dynamain 3 [Source:HGNC Symbol;Acc:29125]                                                                             |
| ENSP00000382981 | 3.325          | 0   | EPB41L3     | erythrocyte membrane protein band 4.1-like 3 [Source:HGNC Symbol;Acc:3380]                                            |
| ENSP00000322234 | 3.324          | 0   | SYNJ1       | synaptojanin 1 [Source:HGNC Symbol;Acc:11503]                                                                         |
| ENSP00000476705 | 3.319          | 0   | ATP1A3      | ATPase, Na <sup>+</sup> /K <sup>+</sup> transporting, alpha 3 polypeptide [Source:HGNC Symbol;Acc:801]                |
| ENSP00000222256 | 3.319          | 0   | RAB3A       | RAB3A, member RAS oncogene family [Source:HGNC Symbol;Acc:9777]                                                       |
| ENSP00000259818 | 3.283          | 0   | TUBB2B      | tubulin, beta 2B class IIb [Source:HGNC Symbol;Acc:30829]                                                             |
| ENSP00000222120 | 3.268          | 0   | RAB3D       | RAB3D, member RAS oncogene family [Source:HGNC Symbol;Acc:9779]                                                       |
| ENSP00000362399 | 3.265          | 0   | STXBP1      | syntaxin binding protein 1 [Source:HGNC Symbol;Acc:11444]                                                             |
| ENSP00000369602 | 3.264          | 0   | HBG2        | hemoglobin, gamma G [Source:HGNC Symbol;Acc:4832]                                                                     |
| ENSP00000348394 | 3.264          | 0   | NCDN        | neurochondrin [Source:HGNC Symbol;Acc:17597]                                                                          |
| ENSP00000218548 | 3.221          | 0   | ATP12A      | ATPase, H <sup>+</sup> /K <sup>+</sup> transporting, nongastric, alpha polypeptide [Source:HGNC Symbol;Acc:13816]     |
| ENSP00000311186 | 3.211          | 0   | ATP2A2      | ATPase, Ca <sup>++</sup> transporting, cardiac muscle, slow twitch 2 [Source:HGNC Symbol;Acc:812]                     |
| ENSP00000356789 | 3.181          | 0   | ATP1B1      | ATPase, Na <sup>+</sup> /K <sup>+</sup> transporting, beta 1 polypeptide [Source:HGNC Symbol;Acc:804]                 |
| ENSP00000449415 | 3.177          | 0   | SYT1        | synaptotagmin I [Source:HGNC Symbol;Acc:11509]                                                                        |
| ENSP00000356787 | 3.157          | 0   | ATP1B1      | ATPase, Na <sup>+</sup> /K <sup>+</sup> transporting, beta 1 polypeptide [Source:HGNC Symbol;Acc:804]                 |
| ENSP00000307341 | 3.147          | 0   | SNAP25      | synaptosomal-associated protein, 25kDa [Source:HGNC Symbol;Acc:11132]                                                 |
| ENSP00000341138 | 3.121          | 0   | EPB41L3     | erythrocyte membrane protein band 4.1-like 3 [Source:HGNC Symbol;Acc:3380]                                            |
| ENSP00000254976 | 3.072          | 0   | SNAP25      | synaptosomal-associated protein, 25kDa [Source:HGNC Symbol;Acc:11132]                                                 |
| ENSP00000292901 | 3.054          | 0   | HBD         | hemoglobin, delta [Source:HGNC Symbol;Acc:4829]                                                                       |
| ENSP00000380987 | 3.043          | 0   | CRMP1       | collapsin response mediator protein 1 [Source:HGNC Symbol;Acc:2365]                                                   |
| ENSP00000262494 | 3.038          | 0   | GNAO1       | guanine nucleotide binding protein (G protein), alpha activating activity polypeptide O [Source:HGNC Symbol;Acc:4389] |
| ENSP00000449426 | 3.03           | 0   | PFKM        | phosphofructokinase, muscle [Source:HGNC Symbol;Acc:8877]                                                             |
| ENSP00000352398 | 3.018          | 0   | HK1         | hexokinase 1 [Source:HGNC Symbol;Acc:4922]                                                                            |
| ENSP00000466696 | 3.015          | 0   | NCAM1       | neural cell adhesion molecule 1 [Source:HGNC Symbol;Acc:7656]                                                         |
| ENSP00000358211 | 2.984          | 0   | HSPA12A     | heat shock 70kDa protein 12A [Source:HGNC Symbol;Acc:19022]                                                           |
| ENSP00000309539 | 2.98           | 0   | DPYSL2      | dihydropyrimidinase-like 2 [Source:HGNC Symbol;Acc:3014]                                                              |
| ENSP00000251595 | 2.98           | 0   | HBA2        | hemoglobin, alpha 2 [Source:HGNC Symbol;Acc:4824]                                                                     |
| ENSP00000318472 | 2.934          | 0   | NCAM1       | neural cell adhesion molecule 1 [Source:HGNC Symbol;Acc:7656]                                                         |
| ENSP00000448653 | 2.893          | 0   | CNTN1       | contactin 1 [Source:HGNC Symbol;Acc:2171]                                                                             |
| ENSP00000262493 | 2.889          | 0   | GNAO1       | guanine nucleotide binding protein (G protein), alpha activating activity polypeptide O [Source:HGNC Symbol;Acc:4389] |
| ENSP00000324804 | 2.887          | 0   | PPP2R1A     | protein phosphatase 2, regulatory subunit A, alpha [Source:HGNC Symbol;Acc:9302]                                      |
| ENSP00000348273 | 2.882          | 0   | MBP         | myelin basic protein [Source:HGNC Symbol;Acc:6925]                                                                    |

|                 |       |          |          |                                                                                                          |
|-----------------|-------|----------|----------|----------------------------------------------------------------------------------------------------------|
| ENSP00000273398 | 2.88  | 0        | ATP6V1A  | ATPase, H <sup>+</sup> transporting, lysosomal 70kDa, V1 subunit A [Source:HGNC Symbol;Acc:851]          |
| ENSP00000380267 | 2.879 | 0        | ATP2B2   | ATPase, Ca <sup>++</sup> transporting, plasma membrane 2 [Source:HGNC Symbol;Acc:815]                    |
| ENSP00000369654 | 2.875 | 0        | HBD      | hemoglobin, delta [Source:HGNC Symbol;Acc:4829]                                                          |
| ENSP00000309438 | 2.855 | 0.000002 | PFKM     | phosphofructokinase, muscle [Source:HGNC Symbol;Acc:8877]                                                |
| ENSP00000375938 | 2.835 | 0        | TUBA4A   | tubulin, alpha 4a [Source:HGNC Symbol;Acc:12407]                                                         |
| ENSP00000298649 | 2.834 | 0        | HK1      | hexokinase 1 [Source:HGNC Symbol;Acc:4922]                                                               |
| ENSP00000379769 | 2.824 | 0        | ACO2     | aconitase 2, mitochondrial [Source:HGNC Symbol;Acc:118]                                                  |
| ENSP00000321606 | 2.814 | 0        | CRMP1    | collapsin response mediator protein 1 [Source:HGNC Symbol;Acc:2365]                                      |
| ENSP00000222812 | 2.813 | 0.000001 | STX1A    | syntaxin 1A (brain) [Source:HGNC Symbol;Acc:11433]                                                       |
| ENSP00000451617 | 2.8   | 0        | TUBB3    | Tubulin beta-3 chain [Source:UniProtKB/Swiss-Prot;Acc:Q13509]                                            |
| ENSP00000413649 | 2.796 | 0        | SYNJ1    | synaptojanin 1 [Source:HGNC Symbol;Acc:11503]                                                            |
| ENSP00000322421 | 2.789 | 0        | HBA1     | hemoglobin, alpha 1 [Source:HGNC Symbol;Acc:4823]                                                        |
| ENSP00000283269 | 2.778 | 0.000002 | CADPS    | Ca <sup>++</sup> -dependent secretion activator [Source:HGNC Symbol;Acc:1426]                            |
| ENSP00000421578 | 2.753 | 0        | GPM6A    | glycoprotein M6A [Source:HGNC Symbol;Acc:4460]                                                           |
| ENSP00000471581 | 2.749 | 0        | ATP1A3   | ATPase, Na <sup>+</sup> /K <sup>+</sup> transporting, alpha 3 polypeptide [Source:HGNC Symbol;Acc:801]   |
| ENSP00000452166 | 2.748 | 0        | TUBB3    | Tubulin beta-3 chain [Source:UniProtKB/Swiss-Prot;Acc:Q13509]                                            |
| ENSP00000351155 | 2.745 | 0        | ATL1     | atlastin GTPase 1 [Source:HGNC Symbol;Acc:11231]                                                         |
| ENSP00000463016 | 2.735 | 0.000008 | SV2A     | synaptic vesicle glycoprotein 2A [Source:HGNC Symbol;Acc:20566]                                          |
| ENSP00000313164 | 2.716 | 0.000005 | DNM2     | dynamin 2 [Source:HGNC Symbol;Acc:2974]                                                                  |
| ENSP00000253413 | 2.715 | 0.000002 | ATP6V1E1 | ATPase, H <sup>+</sup> transporting, lysosomal 31kDa, V1 subunit E1 [Source:HGNC Symbol;Acc:857]         |
| ENSP00000357060 | 2.7   | 0        | ATP1A4   | ATPase, Na <sup>+</sup> /K <sup>+</sup> transporting, alpha 4 polypeptide [Source:HGNC Symbol;Acc:14073] |
| ENSP00000369703 | 2.698 | 0        | TUBB2A   | tubulin, beta 2A class IIa [Source:HGNC Symbol;Acc:12412]                                                |
| ENSP00000472335 | 2.695 | 0.000001 | RAB3A    | RAB3A, member RAS oncogene family [Source:HGNC Symbol;Acc:9777]                                          |
| ENSP00000387694 | 2.691 | 0        | SLC12A5  | solute carrier family 12 (potassium/chloride transporter), member 5 [Source:HGNC Symbol;Acc:13818]       |
| ENSP00000343206 | 2.691 | 0        | SYN1     | synapsin I [Source:HGNC Symbol;Acc:11494]                                                                |
| ENSP00000346522 | 2.69  | 0.000002 | ATL1     | atlastin GTPase 1 [Source:HGNC Symbol;Acc:11231]                                                         |
| ENSP00000459646 | 2.68  | 0.000001 | NSF      | N-ethylmaleimide-sensitive factor [Source:HGNC Symbol;Acc:8016]                                          |
| ENSP00000358141 | 2.669 | 0.000003 | SV2A     | synaptic vesicle glycoprotein 2A [Source:HGNC Symbol;Acc:20566]                                          |
| ENSP00000386192 | 2.666 | 0        | DNM2     | dynamin 2 [Source:HGNC Symbol;Acc:2974]                                                                  |
| ENSP00000439874 | 2.651 | 0        | ATP6V1A  | ATPase, H <sup>+</sup> transporting, lysosomal 70kDa, V1 subunit A [Source:HGNC Symbol;Acc:851]          |
| ENSP00000243964 | 2.645 | 0.000011 | SLC12A5  | solute carrier family 12 (potassium/chloride transporter), member 5 [Source:HGNC Symbol;Acc:13818]       |
| ENSP00000324172 | 2.641 | 0        | ATP2B2   | ATPase, Ca <sup>++</sup> transporting, plasma membrane 2 [Source:HGNC Symbol;Acc:815]                    |
| ENSP00000299518 | 2.64  | 0.000007 | IDH3A    | isocitrate dehydrogenase 3 (NAD <sup>+</sup> ) alpha [Source:HGNC Symbol;Acc:5384]                       |
| ENSP00000362413 | 2.627 | 0        | PGK1     | phosphoglycerate kinase 1 [Source:HGNC Symbol;Acc:8896]                                                  |
| ENSP00000276390 | 2.589 | 0        | ATP6V1B2 | ATPase, H <sup>+</sup> transporting, lysosomal 56/58kDa, V1 subunit B2 [Source:HGNC Symbol;Acc:854]      |
| ENSP00000217133 | 2.567 | 0        | TUBB1    | tubulin, beta 1 class VI [Source:HGNC Symbol;Acc:16257]                                                  |
| ENSP00000318697 | 2.566 | 0        | TUBB6    | tubulin, beta 6 class V [Source:HGNC Symbol;Acc:20776]                                                   |
| ENSP00000328455 | 2.565 | 0.000005 | LSAMP    | limbic system-associated membrane protein [Source:HGNC Symbol;Acc:6705]                                  |
| ENSP00000405750 | 2.563 | 0.000001 | PLP1     | proteolipid protein 1 [Source:HGNC Symbol;Acc:9086]                                                      |
| ENSP00000471490 | 2.545 | 0.000008 | ENO2     | enolase 2 (gamma, neuronal) [Source:HGNC Symbol;Acc:3353]                                                |
| ENSP00000320295 | 2.534 | 0.000002 | TUBB3    | Tubulin beta-3 chain [Source:UniProtKB/Swiss-Prot;Acc:Q13509]                                            |
| ENSP00000268251 | 2.533 | 0.000003 | ABAT     | 4-aminobutyrate aminotransferase [Source:HGNC Symbol;Acc:23]                                             |
| ENSP00000458221 | 2.528 | 0.000006 | NSF      | N-ethylmaleimide-sensitive factor [Source:HGNC Symbol;Acc:8016]                                          |
| ENSP00000467399 | 2.517 | 0        | VAMP2    | vesicle-associated membrane protein 2 (synaptobrevin 2) [Source:HGNC Symbol;Acc:12643]                   |
| ENSP00000353174 | 2.516 | 0.000002 | RYR2     | ryanodine receptor 2 (cardiac) [Source:HGNC Symbol;Acc:10484]                                            |
| ENSP00000470571 | 2.51  | 0.000003 | SYP      | synaptophysin [Source:HGNC Symbol;Acc:11506]                                                             |
| ENSP00000403335 | 2.48  | 0.00001  | PLP1     | proteolipid protein 1 [Source:HGNC Symbol;Acc:9086]                                                      |
| ENSP00000451378 | 2.475 | 0.000005 | TUBB3    | Tubulin beta-3 chain [Source:UniProtKB/Swiss-Prot;Acc:Q13509]                                            |
| ENSP00000280187 | 2.464 | 0.00005  | GPM6A    | glycoprotein M6A [Source:HGNC Symbol;Acc:4460]                                                           |
| ENSP00000427985 | 2.458 | 0        | DPYSL2   | dihydropyrimidinase-like 2 [Source:HGNC Symbol;Acc:3014]                                                 |
| ENSP00000376932 | 2.447 | 0.000006 | SYT1     | synaptotagmin I [Source:HGNC Symbol;Acc:11509]                                                           |
| ENSP00000292807 | 2.436 | 0.000053 | AP2M1    | adaptor-related protein complex 2, mu 1 subunit [Source:HGNC Symbol;Acc:564]                             |
| ENSP00000465154 | 2.428 | 0.000002 | NCAM1    | neural cell adhesion molecule 1 [Source:HGNC Symbol;Acc:7656]                                            |
| ENSP00000301387 | 2.427 | 0.000383 | ATP2A3   | ATPase, Ca <sup>++</sup> transporting, ubiquitous [Source:HGNC Symbol;Acc:813]                           |
| ENSP00000341289 | 2.419 | 0        | TUBB4B   | tubulin, beta 4B class IVb [Source:HGNC Symbol;Acc:20771]                                                |
| ENSP00000409667 | 2.405 | 0.000176 | SYNJ1    | synaptojanin 1 [Source:HGNC Symbol;Acc:11503]                                                            |
| ENSP00000313567 | 2.404 | 0        | CYFIP2   | cytoplasmic FMR1 interacting protein 2 [Source:HGNC Symbol;Acc:13760]                                    |
| ENSP00000378872 | 2.383 | 0.000002 | ATP2A2   | ATPase, Ca <sup>++</sup> transporting, cardiac muscle, slow twitch 2 [Source:HGNC Symbol;Acc:812]        |
| ENSP00000398320 | 2.38  | 0.00003  | GLUL     | glutamate-ammonia ligase [Source:HGNC Symbol;Acc:4341]                                                   |
| ENSP00000411916 | 2.378 | 0.000048 | ABAT     | 4-aminobutyrate aminotransferase [Source:HGNC Symbol;Acc:23]                                             |
| ENSP00000387506 | 2.377 | 0.000021 | IDH3A    | isocitrate dehydrogenase 3 (NAD <sup>+</sup> ) alpha [Source:HGNC Symbol;Acc:5384]                       |
| ENSP00000411705 | 2.375 | 0        | ATP1A2   | ATPase, Na <sup>+</sup> /K <sup>+</sup> transporting, alpha 2 polypeptide [Source:HGNC Symbol;Acc:800]   |

|                 |       |          |               |                                                                                                                       |
|-----------------|-------|----------|---------------|-----------------------------------------------------------------------------------------------------------------------|
| ENSP00000346545 | 2.369 | 0.000119 | MBP           | myelin basic protein [Source:HGNC Symbol;Acc:6925]                                                                    |
| ENSP00000347359 | 2.364 | 0.000002 | ATP6V1H       | ATPase, H <sup>+</sup> transporting, lysosomal 50/57kDa, V1 subunit H [Source:HGNC Symbol;Acc:18303]                  |
| ENSP00000262623 | 2.35  | 0        | ATP4A         | ATPase, H <sup>+</sup> /K <sup>+</sup> exchanging, alpha polypeptide [Source:HGNC Symbol;Acc:819]                     |
| ENSP00000324105 | 2.35  | 0.000005 | ENO3          | enolase 3 (beta, muscle) [Source:HGNC Symbol;Acc:3354]                                                                |
| ENSP00000362350 | 2.338 | 0.000105 | NCDN          | neurochondrin [Source:HGNC Symbol;Acc:17597]                                                                          |
| ENSP00000457610 | 2.336 | 0.000019 | TUBB8         | tubulin, beta 8 class VIII [Source:HGNC Symbol;Acc:20773]                                                             |
| ENSP00000354111 | 2.314 | 0.000003 | DNAJC5        | DnaJ (Hsp40) homolog, subfamily C, member 5 [Source:HGNC Symbol;Acc:16235]                                            |
| ENSP00000477015 | 2.302 | 0.00013  | ATP1B1        | ATPase, Na <sup>+</sup> /K <sup>+</sup> transporting, beta 1 polypeptide [Source:HGNC Symbol;Acc:804]                 |
| ENSP00000429947 | 2.296 | 0.00004  | ATP6V1H       | ATPase, H <sup>+</sup> transporting, lysosomal 50/57kDa, V1 subunit H [Source:HGNC Symbol;Acc:18303]                  |
| ENSP00000350632 | 2.291 | 0.000228 | CADPS         | Ca <sup>++</sup> -dependent secretion activator [Source:HGNC Symbol;Acc:1426]                                         |
| ENSP00000340716 | 2.288 | 0.000036 | RTN1          | reticulon 1 [Source:HGNC Symbol;Acc:10467]                                                                            |
| ENSP00000447006 | 2.281 | 0.000019 | CNTN1         | contactin 1 [Source:HGNC Symbol;Acc:2171]                                                                             |
| ENSP00000423444 | 2.279 | 0.000005 | MAP1B         | microtubule-associated protein 1B [Source:HGNC Symbol;Acc:6836]                                                       |
| ENSP00000309431 | 2.279 | 0.000008 | RP11-683L23.1 | Tubulin beta-8 chain-like protein LOC260334 [Source:UniProtKB/Swiss-Prot;Acc:A6NNZ2]                                  |
| ENSP00000430682 | 2.265 | 0.000001 | ATP6V1B2      | ATPase, H <sup>+</sup> transporting, lysosomal 56/58kDa, V1 subunit B2 [Source:HGNC Symbol;Acc:854]                   |
| ENSP00000385447 | 2.259 | 0.00053  | SYNGR1        | synaptogyrin 1 [Source:HGNC Symbol;Acc:11498]                                                                         |
| ENSP00000261793 | 2.254 | 0.001023 | CAMK2A        | calcium/calmodulin-dependent protein kinase II alpha [Source:HGNC Symbol;Acc:1460]                                    |
| ENSP00000455774 | 2.252 | 0.000416 | GNAO1         | guanine nucleotide binding protein (G protein), alpha activating activity polypeptide O [Source:HGNC Symbol;Acc:4389] |
| ENSP00000436029 | 2.251 | 0.000034 | SLC1A2        | solute carrier family 1 (glial high affinity glutamate transporter), member 2 [Source:HGNC Symbol;Acc:10940]          |
| ENSP00000434744 | 2.248 | 0.000023 | DNAJC5        | DnaJ (Hsp40) homolog, subfamily C, member 5 [Source:HGNC Symbol;Acc:16235]                                            |
| ENSP00000295156 | 2.244 | 0.000335 | VSNL1         | visinin-like 1 [Source:HGNC Symbol;Acc:12722]                                                                         |
| ENSP00000278379 | 2.223 | 0.000002 | SLC1A2        | solute carrier family 1 (glial high affinity glutamate transporter), member 2 [Source:HGNC Symbol;Acc:10940]          |
| ENSP00000296755 | 2.222 | 0.00003  | MAP1B         | microtubule-associated protein 1B [Source:HGNC Symbol;Acc:6836]                                                       |
| ENSP00000451560 | 2.221 | 0.000461 | TUBB3         | tubulin, beta 3 class III [Source:HGNC Symbol;Acc:20772]                                                              |
| ENSP00000472481 | 2.217 | 0        | TUBB4A        | tubulin, beta 4A class IVa [Source:HGNC Symbol;Acc:20774]                                                             |
| ENSP00000333994 | 2.21  | 0.000001 | HBB           | hemoglobin, beta [Source:HGNC Symbol;Acc:4827]                                                                        |
| ENSP00000384014 | 2.207 | 0.000453 | VSNL1         | visinin-like 1 [Source:HGNC Symbol;Acc:12722]                                                                         |
| ENSP00000380899 | 2.192 | 0.00049  | HBA1          | hemoglobin, alpha 1 [Source:HGNC Symbol;Acc:4823]                                                                     |
| ENSP00000444708 | 2.19  | 0.000002 | PGK1          | phosphoglycerate kinase 1 [Source:HGNC Symbol;Acc:8896]                                                               |
| ENSP00000366225 | 2.186 | 0.001517 | NAPB          | N-ethylmaleimide-sensitive factor attachment protein, beta [Source:HGNC Symbol;Acc:15751]                             |
| ENSP00000382696 | 2.171 | 0.000021 | ATP6V1E1      | ATPase, H <sup>+</sup> transporting, lysosomal 31kDa, V1 subunit E1 [Source:HGNC Symbol;Acc:857]                      |
| ENSP00000410829 | 2.171 | 0.001805 | TUBB          | tubulin, beta class I [Source:HGNC Symbol;Acc:20778]                                                                  |
| ENSP00000282878 | 2.167 | 0.000499 | RAB3C         | RAB3C, member RAS oncogene family [Source:HGNC Symbol;Acc:30269]                                                      |
| ENSP00000277865 | 2.155 | 0.000779 | GLUD1         | glutamate dehydrogenase 1 [Source:HGNC Symbol;Acc:4335]                                                               |
| ENSP00000420908 | 2.148 | 0.001637 | SPOP          | speckle-type POZ protein [Source:HGNC Symbol;Acc:11254]                                                               |
| ENSP00000465820 | 2.144 | 0.000352 | VAMP3         | vesicle-associated membrane protein 3 [Source:HGNC Symbol;Acc:12644]                                                  |
| ENSP00000400720 | 2.14  | 0.001308 | SNAP25        | synaptosomal-associated protein, 25kDa [Source:HGNC Symbol;Acc:11132]                                                 |
| ENSP00000449748 | 2.136 | 0        | TUBA1B        | tubulin, alpha 1b [Source:HGNC Symbol;Acc:18809]                                                                      |
| ENSP00000366650 | 2.134 | 0        | PYGM          | phosphorylase, glycogen, muscle [Source:HGNC Symbol;Acc:9726]                                                         |
| ENSP00000164139 | 2.131 | 0        | PYGM          | phosphorylase, glycogen, muscle [Source:HGNC Symbol;Acc:9726]                                                         |
| ENSP00000477306 | 2.126 | 0        | TUBA8         | tubulin, alpha 8 [Source:HGNC Symbol;Acc:12410]                                                                       |
| ENSP00000248437 | 2.124 | 0        | TUBA4A        | tubulin, alpha 4a [Source:HGNC Symbol;Acc:12407]                                                                      |
| ENSP00000240327 | 2.122 | 0.000869 | SPOP          | speckle-type POZ protein [Source:HGNC Symbol;Acc:11254]                                                               |
| ENSP00000340466 | 2.118 | 0.000022 | GANAB         | glucosidase, alpha; neutral AB [Source:HGNC Symbol;Acc:4138]                                                          |
| ENSP00000349238 | 2.114 | 0.002092 | CCDC88B       | coiled-coil domain containing 88B [Source:HGNC Symbol;Acc:26757]                                                      |
| ENSP00000470986 | 2.101 | 0        | PGK1          | phosphoglycerate kinase 1 [Source:HGNC Symbol;Acc:8896]                                                               |
| ENSP00000404740 | 2.089 | 0.001047 | TUBA4A        | tubulin, alpha 4a [Source:HGNC Symbol;Acc:12407]                                                                      |
| ENSP00000457238 | 2.087 | 0.001227 | GNAO1         | guanine nucleotide binding protein (G protein), alpha activating activity polypeptide O [Source:HGNC Symbol;Acc:4389] |
| ENSP00000258682 | 2.086 | 0.00002  | CAMK2B        | calcium/calmodulin-dependent protein kinase II beta [Source:HGNC Symbol;Acc:1461]                                     |
| ENSP00000226253 | 2.066 | 0        | ALDOC         | aldolase C, fructose-bisphosphate [Source:HGNC Symbol;Acc:418]                                                        |
| ENSP00000382982 | 2.062 | 0        | TUBA3C        | tubulin, alpha 3c [Source:HGNC Symbol;Acc:12408]                                                                      |
| ENSP00000427954 | 2.056 | 0.005013 | DPYSL2        | dihydropyrimidinase-like 2 [Source:HGNC Symbol;Acc:3014]                                                              |
| ENSP00000307900 | 2.053 | 0.001288 | GLUL          | glutamate-ammonia ligase [Source:HGNC Symbol;Acc:4341]                                                                |
| ENSP00000264449 | 2.05  | 0.002011 | ATP8A1        | ATPase, aminophospholipid transporter (APLT), class I, type 8A, member 1 [Source:HGNC Symbol;Acc:13531]               |
| ENSP00000431630 | 2.04  | 0        | AP2A2         | adaptor-related protein complex 2, alpha 2 subunit [Source:HGNC Symbol;Acc:562]                                       |
| ENSP00000305995 | 2.04  | 0        | PGK2          | phosphoglycerate kinase 2 [Source:HGNC Symbol;Acc:8898]                                                               |
| ENSP00000418799 | 2.036 | 0        | TUBAL3        | tubulin, alpha-like 3 [Source:HGNC Symbol;Acc:23534]                                                                  |
| ENSP00000234396 | 2.013 | 0.005891 | ATP6V1B1      | ATPase, H <sup>+</sup> transporting, lysosomal 56/58kDa, V1 subunit B1 [Source:HGNC Symbol;Acc:853]                   |

|                 |       |          |          |                                                                                                                       |
|-----------------|-------|----------|----------|-----------------------------------------------------------------------------------------------------------------------|
| ENSP00000378729 | 2.009 | 0        | ALDOC    | aldolase C, fructose-bisphosphate [Source:HGNC Symbol;Acc:418]                                                        |
| ENSP00000452001 | 2.008 | 0.007791 | TUBB3    | Tubulin beta-3 chain [Source:UniProtKB/Swiss-Prot;Acc:Q13509]                                                         |
| ENSP00000314214 | 2.006 | 0.002077 | VAMP2    | vesicle-associated membrane protein 2 (synaptobrevin 2) [Source:HGNC Symbol;Acc:12643]                                |
| ENSP00000216442 | 1.999 | 0.006891 | ATP6V1D  | ATPase, H <sup>+</sup> transporting, lysosomal 34kDa, V1 subunit D [Source:HGNC Symbol;Acc:13527]                     |
| ENSP00000256496 | 1.998 | 0.003418 | ARL8B    | ADP-ribosylation factor-like 8B [Source:HGNC Symbol;Acc:25564]                                                        |
| ENSP00000450538 | 1.994 | 0.001403 | TUBB3    | Tubulin beta-3 chain [Source:UniProtKB/Swiss-Prot;Acc:Q13509]                                                         |
| ENSP00000431117 | 1.993 | 0        | DPYSL2   | dihydropyrimidinase-like 2 [Source:HGNC Symbol;Acc:3014]                                                              |
| ENSP00000330862 | 1.987 | 0.003978 | OPCML    | opioid binding protein/cell adhesion molecule-like [Source:HGNC Symbol;Acc:8143]                                      |
| ENSP00000342056 | 1.984 | 0.001717 | CS       | citrate synthase [Source:HGNC Symbol;Acc:2422]                                                                        |
| ENSP00000327694 | 1.983 | 0        | AP2A2    | adaptor-related protein complex 2, alpha 2 subunit [Source:HGNC Symbol;Acc:562]                                       |
| ENSP00000393391 | 1.975 | 0.003759 | PLP1     | proteolipid protein 1 [Source:HGNC Symbol;Acc:9086]                                                                   |
| ENSP00000470627 | 1.969 | 0.005005 | TUBB4A   | tubulin, beta 4A class IVa [Source:HGNC Symbol;Acc:20774]                                                             |
| ENSP00000376066 | 1.958 | 0.008418 | ATP1A2   | ATPase, Na <sup>+</sup> /K <sup>+</sup> transporting, alpha 2 polypeptide [Source:HGNC Symbol;Acc:800]                |
| ENSP00000391905 | 1.958 | 0.000412 | PPP2R1A  | protein phosphatase 2, regulatory subunit A, alpha [Source:HGNC Symbol;Acc:9302]                                      |
| ENSP00000370388 | 1.956 | 0.004201 | DNM1L    | dynamitin 1-like [Source:HGNC Symbol;Acc:2973]                                                                        |
| ENSP00000340903 | 1.953 | 0.003668 | RTN3     | reticulon 3 [Source:HGNC Symbol;Acc:10469]                                                                            |
| ENSP00000290949 | 1.951 | 0.000088 | ATP6V0D1 | ATPase, H <sup>+</sup> transporting, lysosomal 38kDa, V0 subunit d1 [Source:HGNC Symbol;Acc:13724]                    |
| ENSP00000401317 | 1.949 | 0.000002 | TUBB     | tubulin, beta class I [Source:HGNC Symbol;Acc:20778]                                                                  |
| ENSP00000448004 | 1.948 | 0.002169 | CNTN1    | contactin 1 [Source:HGNC Symbol;Acc:2171]                                                                             |
| ENSP00000249071 | 1.94  | 0        | RAC2     | ras-related C3 botulinum toxin substrate 2 (rho family, small GTP binding protein Rac2) [Source:HGNC Symbol;Acc:9802] |
| ENSP00000311489 | 1.939 | 0.00041  | SPTBN2   | spectrin, beta, non-erythrocytic 2 [Source:HGNC Symbol;Acc:11276]                                                     |
| ENSP00000267484 | 1.922 | 0.006007 | RTN1     | reticulon 1 [Source:HGNC Symbol;Acc:10467]                                                                            |
| ENSP00000363910 | 1.901 | 0.005417 | OPCML    | opioid binding protein/cell adhesion molecule-like [Source:HGNC Symbol;Acc:8143]                                      |
| ENSP00000447860 | 1.888 | 0.00299  | CNTN1    | contactin 1 [Source:HGNC Symbol;Acc:2171]                                                                             |
| ENSP00000458474 | 1.885 | 0.009209 | HSPA12A  | heat shock 70kDa protein 12A [Source:HGNC Symbol;Acc:19022]                                                           |
| ENSP00000463328 | 1.883 | 0.000142 | ATP6V0D1 | ATPase, H <sup>+</sup> transporting, lysosomal 38kDa, V0 subunit d1 [Source:HGNC Symbol;Acc:13724]                    |
| ENSP00000437971 | 1.882 | 0.009973 | RTN3     | reticulon 3 [Source:HGNC Symbol;Acc:10469]                                                                            |
| ENSP00000384144 | 1.874 | 0.00918  | HYOU1    | hypoxia up-regulated 1 [Source:HGNC Symbol;Acc:16931]                                                                 |
| ENSP00000428009 | 1.873 | 0        | CYFIP2   | cytoplasmic FMR1 interacting protein 2 [Source:HGNC Symbol;Acc:13760]                                                 |
| ENSP00000293590 | 1.869 | 0.007995 | FMNL3    | formin-like 3 [Source:HGNC Symbol;Acc:23698]                                                                          |
| ENSP00000054666 | 1.868 | 0        | VAMP3    | vesicle-associated membrane protein 3 [Source:HGNC Symbol;Acc:12644]                                                  |
| ENSP00000247461 | 1.867 | 0        | CANX     | calnexin [Source:HGNC Symbol;Acc:1473]                                                                                |
| ENSP00000450712 | 1.855 | 0.000001 | HSP90AA1 | heat shock protein 90kDa alpha (cytosolic), class A member 1 [Source:HGNC Symbol;Acc:5253]                            |
| ENSP00000440874 | 1.855 | 0        | RTN3     | reticulon 3 [Source:HGNC Symbol;Acc:10469]                                                                            |
| ENSP00000336850 | 1.85  | 0.000024 | RAB6A    | RAB6A, member RAS oncogene family [Source:HGNC Symbol;Acc:9786]                                                       |
| ENSP00000450268 | 1.845 | 0        | TUBA1A   | tubulin, alpha 1a [Source:HGNC Symbol;Acc:20766]                                                                      |
| ENSP00000475018 | 1.838 | 0        | AP2B1    | adaptor-related protein complex 2, beta 1 subunit [Source:HGNC Symbol;Acc:563]                                        |
| ENSP00000354451 | 1.823 | 0.00482  | IQGAP3   | IQ motif containing GTPase activating protein 3 [Source:HGNC Symbol;Acc:20669]                                        |
| ENSP00000468777 | 1.808 | 0.009526 | TUBB6    | tubulin, beta 6 class V [Source:HGNC Symbol;Acc:20776]                                                                |
| ENSP00000339001 | 1.806 | 0        | TUBB     | tubulin, beta class I [Source:HGNC Symbol;Acc:20778]                                                                  |
| ENSP00000327070 | 1.805 | 0.000044 | MDH2     | malate dehydrogenase 2, NAD (mitochondrial) [Source:HGNC Symbol;Acc:6971]                                             |
| ENSP00000417545 | 1.796 | 0.000674 | ATP6V1A  | ATPase, H <sup>+</sup> transporting, lysosomal 70kDa, V1 subunit A [Source:HGNC Symbol;Acc:851]                       |
| ENSP00000405114 | 1.785 | 0.003678 | ATP6V1B1 | ATPase, H <sup>+</sup> transporting, lysosomal 56/58kDa, V1 subunit B1 [Source:HGNC Symbol;Acc:853]                   |
| ENSP00000403778 | 1.78  | 0.006884 | RAC2     | ras-related C3 botulinum toxin substrate 2 (rho family, small GTP binding protein Rac2) [Source:HGNC Symbol;Acc:9802] |
| ENSP00000371894 | 1.764 | 0.000008 | AP2M1    | adaptor-related protein complex 2, mu 1 subunit [Source:HGNC Symbol;Acc:564]                                          |
| ENSP00000427099 | 1.758 | 0.005573 | C5orf28  | chromosome 5 open reading frame 28 [Source:HGNC Symbol;Acc:26139]                                                     |
| ENSP00000348965 | 1.753 | 0        | DYNC1H1  | dynein, cytoplasmic 1, heavy chain 1 [Source:HGNC Symbol;Acc:2961]                                                    |
| ENSP00000424063 | 1.749 | 0        | CANX     | calnexin [Source:HGNC Symbol;Acc:1473]                                                                                |
| ENSP00000262030 | 1.72  | 0        | ATP5B    | ATP synthase, H <sup>+</sup> transporting, mitochondrial F1 complex, beta polypeptide [Source:HGNC Symbol;Acc:830]    |
| ENSP00000262325 | 1.705 | 0        | AP2B1    | adaptor-related protein complex 2, beta 1 subunit [Source:HGNC Symbol;Acc:563]                                        |
| ENSP00000300289 | 1.697 | 0        | PDIA3    | protein disulfide isomerase family A, member 3 [Source:HGNC Symbol;Acc:4606]                                          |
| ENSP00000442318 | 1.692 | 0        | CAND1    | cullin-associated and neddylation-dissociated 1 [Source:HGNC Symbol;Acc:30688]                                        |
| ENSP00000438260 | 1.639 | 0        | PDIA3    | protein disulfide isomerase family A, member 3 [Source:HGNC Symbol;Acc:4606]                                          |
| ENSP00000408649 | 1.636 | 0.000142 | MDH2     | malate dehydrogenase 2, NAD (mitochondrial) [Source:HGNC Symbol;Acc:6971]                                             |
| ENSP00000344106 | 1.617 | 0.00012  | RTN3     | reticulon 3 [Source:HGNC Symbol;Acc:10469]                                                                            |
| ENSP00000229264 | 1.607 | 0.000245 | GNB3     | guanine nucleotide binding protein (G protein), beta polypeptide 3 [Source:HGNC Symbol;Acc:4400]                      |
| ENSP00000301071 | 1.6   | 0        | TUBA1A   | tubulin, alpha 1a [Source:HGNC Symbol;Acc:20766]                                                                      |
| ENSP00000336799 | 1.585 | 0        | TUBA1B   | tubulin, alpha 1b [Source:HGNC Symbol;Acc:18809]                                                                      |
| ENSP00000229277 | 1.576 | 0        | ENO2     | enolase 2 (gamma, neuronal) [Source:HGNC Symbol;Acc:3353]                                                             |

|                 |       |          |          |                                                                                                                       |
|-----------------|-------|----------|----------|-----------------------------------------------------------------------------------------------------------------------|
| ENSP00000302961 | 1.554 | 0        | HSPA4    | heat shock 70kDa protein 4 [Source:HGNC Symbol;Acc:5237]                                                              |
| ENSP00000435306 | 1.526 | 0.003345 | GANAB    | glucosidase, alpha; neutral AB [Source:HGNC Symbol;Acc:4138]                                                          |
| ENSP00000400022 | 1.501 | 0.000001 | AP1B1    | adaptor-related protein complex 1, beta 1 subunit [Source:HGNC Symbol;Acc:554]                                        |
| ENSP00000269122 | 1.485 | 0        | CLTC     | clathrin, heavy chain (Hc) [Source:HGNC Symbol;Acc:2092]                                                              |
| ENSP00000344868 | 1.481 | 0.000004 | SEPT7    | septin 7 [Source:HGNC Symbol;Acc:1717]                                                                                |
| ENSP00000430636 | 1.478 | 0        | ENO3     | enolase 3 (beta, muscle) [Source:HGNC Symbol;Acc:3354]                                                                |
| ENSP00000387286 | 1.455 | 0        | RAB1A    | RAB1A, member RAS oncogene family [Source:HGNC Symbol;Acc:9758]                                                       |
| ENSP00000297185 | 1.453 | 0.004612 | HSPA9    | heat shock 70kDa protein 9 (mortalin) [Source:HGNC Symbol;Acc:5244]                                                   |
| ENSP00000310226 | 1.446 | 0.00037  | RAB1B    | RAB1B, member RAS oncogene family [Source:HGNC Symbol;Acc:18370]                                                      |
| ENSP00000396127 | 1.425 | 0.00127  | RAN      | RAN, member RAS oncogene family [Source:HGNC Symbol;Acc:9846]                                                         |
| ENSP00000377470 | 1.408 | 0        | CNP      | 2',3'-cyclic nucleotide 3' phosphodiesterase [Source:HGNC Symbol;Acc:2158]                                            |
| ENSP00000394071 | 1.408 | 0.000665 | GDI1     | GDP dissociation inhibitor 1 [Source:HGNC Symbol;Acc:4226]                                                            |
| ENSP00000376763 | 1.398 | 0        | CLTC     | clathrin, heavy chain (Hc) [Source:HGNC Symbol;Acc:2092]                                                              |
| ENSP00000393340 | 1.396 | 0        | TUBB     | tubulin, beta class I [Source:HGNC Symbol;Acc:20778]                                                                  |
| ENSP00000448725 | 1.392 | 0.000579 | TUBA1A   | tubulin, alpha 1a [Source:HGNC Symbol;Acc:20766]                                                                      |
| ENSP00000449325 | 1.378 | 0        | TUBA1B   | tubulin, alpha 1b [Source:HGNC Symbol;Acc:18809]                                                                      |
| ENSP00000446489 | 1.374 | 0.000002 | ATP5B    | ATP synthase, H+ transporting, mitochondrial F1 complex, beta polypeptide [Source:HGNC Symbol;Acc:830]                |
| ENSP00000216962 | 1.37  | 0        | PYGB     | phosphorylase, glycogen; brain [Source:HGNC Symbol;Acc:9723]                                                          |
| ENSP00000269848 | 1.347 | 0.00307  | PFKL     | phosphofructokinase, liver [Source:HGNC Symbol;Acc:8876]                                                              |
| ENSP00000377466 | 1.345 | 0        | CNP      | 2',3'-cyclic nucleotide 3' phosphodiesterase [Source:HGNC Symbol;Acc:2158]                                            |
| ENSP00000216281 | 1.315 | 0        | HSP90AA1 | heat shock protein 90kDa alpha (cytosolic), class A member 1 [Source:HGNC Symbol;Acc:5253]                            |
| ENSP00000227378 | 1.294 | 0        | HSPA8    | heat shock 70kDa protein 8 [Source:HGNC Symbol;Acc:5241]                                                              |
| ENSP00000325875 | 1.292 | 0        | HSP90AB1 | heat shock protein 90kDa alpha (cytosolic), class B member 1 [Source:HGNC Symbol;Acc:5258]                            |
| ENSP00000396189 | 1.268 | 0.000002 | HSP90AA1 | heat shock protein 90kDa alpha (cytosolic), class A member 1 [Source:HGNC Symbol;Acc:5253]                            |
| ENSP00000417978 | 1.216 | 0.000537 | RAB7A    | RAB7A, member RAS oncogene family [Source:HGNC Symbol;Acc:9788]                                                       |
| ENSP00000295598 | 1.211 | 0        | ATP1A1   | ATPase, Na+/K+ transporting, alpha 1 polypeptide [Source:HGNC Symbol;Acc:799]                                         |
| ENSP00000300161 | 1.211 | 0.000012 | YWHAB    | tyrosine 3-monooxygenase/tryptophan 5-monooxygenase activation protein, beta [Source:HGNC Symbol;Acc:12849]           |
| ENSP00000362946 | 1.21  | 0.004672 | RAB14    | RAB14, member RAS oncogene family [Source:HGNC Symbol;Acc:16524]                                                      |
| ENSP00000258737 | 1.207 | 0.000063 | RAC1     | ras-related C3 botulinum toxin substrate 1 (rho family, small GTP binding protein Rac1) [Source:HGNC Symbol;Acc:9801] |
| ENSP00000432884 | 1.173 | 0.001303 | HSPA8    | heat shock 70kDa protein 8 [Source:HGNC Symbol;Acc:5241]                                                              |
| ENSP00000324173 | 1.155 | 0.000001 | HSPA5    | heat shock 70kDa protein 5 (glucose-regulated protein, 78kDa) [Source:HGNC Symbol;Acc:5238]                           |
| ENSP00000361930 | 1.14  | 0.003712 | YWHAB    | tyrosine 3-monooxygenase/tryptophan 5-monooxygenase activation protein, beta [Source:HGNC Symbol;Acc:12849]           |
| ENSP00000265062 | 1.094 | 0.000006 | RAB7A    | RAB7A, member RAS oncogene family [Source:HGNC Symbol;Acc:9788]                                                       |
| ENSP00000414479 | 1.048 | 0.000001 | TUBB     | tubulin, beta class I [Source:HGNC Symbol;Acc:20778]                                                                  |
| ENSP00000360609 | 1.016 | 0.000001 | HSP90AB1 | heat shock protein 90kDa alpha (cytosolic), class B member 1 [Source:HGNC Symbol;Acc:5258]                            |
| ENSP00000299138 | 1.015 | 0.00487  | VPS35    | vacuolar protein sorting 35 homolog (S. cerevisiae) [Source:HGNC Symbol;Acc:13487]                                    |
| ENSP00000264710 | 1.01  | 0.000093 | RAB10    | RAB10, member RAS oncogene family [Source:HGNC Symbol;Acc:9759]                                                       |
| ENSP00000306330 | 0.948 | 0        | YWHAG    | tyrosine 3-monooxygenase/tryptophan 5-monooxygenase activation protein, gamma [Source:HGNC Symbol;Acc:12852]          |
| ENSP00000318575 | 0.945 | 0.000502 | TUBA8    | tubulin, alpha 8 [Source:HGNC Symbol;Acc:12410]                                                                       |
| ENSP00000299767 | 0.92  | 0.000001 | HSP90B1  | heat shock protein 90kDa beta (Grp94), member 1 [Source:HGNC Symbol;Acc:12028]                                        |
| ENSP00000000233 | 0.793 | 0.001525 | ARF5     | ADP-ribosylation factor 5 [Source:HGNC Symbol;Acc:658]                                                                |
| ENSP00000290378 | 0.663 | 0.007581 | ACTC1    | actin, alpha, cardiac muscle 1 [Source:HGNC Symbol;Acc:143]                                                           |
| ENSP00000238081 | 0.635 | 0.00327  | YWHAQ    | tyrosine 3-monooxygenase/tryptophan 5-monooxygenase activation protein, theta [Source:HGNC Symbol;Acc:12854]          |
| ENSP00000217182 | 0.563 | 0.000007 | EEF1A2   | eukaryotic translation elongation factor 1 alpha 2 [Source:HGNC Symbol;Acc:3192]                                      |
| ENSP00000398239 | 0.549 | 0.002059 | ACTA2    | actin, alpha 2, smooth muscle, aorta [Source:HGNC Symbol;Acc:130]                                                     |
| ENSP00000358508 | 0.445 | 0.00772  | ATP1A1   | ATPase, Na+/K+ transporting, alpha 1 polypeptide [Source:HGNC Symbol;Acc:799]                                         |
| ENSP00000459119 | 0.415 | 0        | ACTG1    | actin, gamma 1 [Source:HGNC Symbol;Acc:144]                                                                           |
| ENSP00000224784 | 0.362 | 0.00002  | ACTA2    | actin, alpha 2, smooth muscle, aorta [Source:HGNC Symbol;Acc:130]                                                     |

**Supplementary Table S4. A list of NBE-MS-CMV proteome included in four categories.<sup>a</sup>**

| Angiogenesis | Anti-inflammation | Neurogenesis | Apoptosis |
|--------------|-------------------|--------------|-----------|
| ANXA3        | ABR               | ABR          | AARS      |
| APOE         | ACTG1             | ACAT1        | ABR       |
| ATP5A1       | ANXA3             | ACTG1        | ACO2      |
| CAV1         | APOE              | AP2A1        | ACTC1     |
| CDC42        | APP               | AP2B1        | ACTN4     |
| CDH13        | ATP1B1            | ALCAM        | ACTN1     |
| HBB          | ATP1B2            | BIN1         | ALB       |
| RAB13        | BCL6              | ANK2         | ALDOC     |
| RAP1A        | CALM2             | APOE         | BIN1      |
| PRMT5        | CAMK2A            | APP          | SLC25A4   |
| NDRG2        | CAMK2B            | RHOA         | SLC25A6   |
|              | CAMK2D            | RHOB         | ANXA5     |
|              | CAMK2G            | RHOG         | APOE      |
|              | CAPZA1            | ATIC         | RHOA      |
|              | CAPZA2            | ATP2B2       | RHOB      |
|              | CAV1              | CALM2        | ATP2A1    |
|              | CD59              | CALR         | ATP2B3    |
|              | CDC42             | CAMK2A       | BCL6      |
|              | CFL1              | CAMK2B       | CALR      |
|              | COL1A2            | CAMK2G       | CAV1      |
|              | DUSP3             | CAPZB        | CD59      |
|              | EIF4E             | CDC42        | CFL1      |
|              | FLNB              | CFL1         | CSE1L     |
|              | GSK3A             | CKB          | DCTN1     |
|              | GSTP1             | AP2M1        | DYNC1H1   |
|              | HMGB1             | AP2S1        | DNM2      |
|              | HPRT1             | CNP          | DPP6      |
|              | HRAS              | CNTN1        | EEF1A2    |
|              | HSP90AA1          | CRMP1        | EEF2      |
|              | HSP90AB1          | DBN1         | GARS      |
|              | HSPD1             | DCTN1        | SFN       |
|              | ITPR1             | DPYSL2       | PDIA3     |
|              | KPNB1             | DPYSL3       | GSK3A     |
|              | KRT1              | FKBP4        | GSTP1     |
|              | MBP               | GAPDH        | HBA2      |
|              | MYH9              | GMFB         | HBB       |
|              | NCAM1             | GNAO1        | HINT1     |
|              | NME1              | GNAQ         | HK1       |
|              | NRAS              | GPM6A        | HMGB1     |

|         |          |          |
|---------|----------|----------|
| PCBP2   | GPM6B    | HRAS     |
| PLP1    | GSK3A    | HSPA1B   |
| PPP3CA  | GSTP1    | HSPA5    |
| PRKACA  | HMGB1    | HSPA9    |
| PRKACB  | HPRT1    | HSP90AB1 |
| PRKAR2A | HRAS     | HSPD1    |
| PRKAR2B | HSPA5    | ITPR1    |
| PRKCA   | HSP90AA1 | KIF5A    |
| PRKCG   | HSP90AB1 | KPNB1    |
| MAPK1   | KIF5A    | KRT8     |
| MAPK3   | KIF5C    | LRP1     |
| MAP2K1  | LDHA     | NME1     |
| MAP2K2  | LSAMP    | NRAS     |
| RAC1    | LY6H     | OPA1     |
| RAC2    | MAP1B    | PFN1     |
| RPS19   | MBP      | PKM      |
| S100A13 | MYH9     | PLP1     |
| S100B   | MYH10    | POR      |
| SLC3A2  | NCAM1    | PPP1CA   |
| SP100   | NCAM2    | PPP2CB   |
| YWHAB   | NME1     | PPP2R1A  |
| SEMA7A  | NRAS     | PPP2R1B  |
| EIF4A3  | OGDH     | PPP2R2B  |
| ABI1    | OXCT1    | PRKCA    |
| ARPC4   | PAFAH1B1 | PRKCB    |
| ARPC3   | PLP1     | PRKCG    |
| ACTR3   | PPP1CC   | MAPK1    |
| ACTR2   | MAPK1    | MAPK3    |
| ARPC2   | MAPK3    | PRPS1    |
| ARPC1A  | MAP2K1   | PSMD2    |
| NCKAP1  | MAP2K2   | PYGL     |
| CORO1A  | PRPS1    | RAC1     |
| SIRT2   | PURA     | RPS6     |
| PHLPP2  | RAB3A    | S100B    |
| PRDX5   | RAB5A    | SPTAN1   |
| GREM1   | RAB13    | SPTBN2   |
| CYFIP2  | RAC1     | STXBP1   |
|         | RAC2     | UBA1     |
|         | RAC3     | UBE2V1   |
|         | RAP1A    | UCHL1    |
|         | RTN1     | VCP      |
|         | RYR2     | VDAC1    |
|         | S100B    | WFS1     |
|         | SH3GL1   | YWHAB    |

|          |          |
|----------|----------|
| SH3GL2   | YWHAE    |
| SLC1A2   | YWHAG    |
| SLC1A3   | YWHAH    |
| SNAP25   | YWHAZ    |
| SPTAN1   | RAB7A    |
| SPTBN2   | CUL5     |
| SYP      | YARS     |
| UBE2V1   | DYNLL1   |
| EZR      | SYNJ1    |
| YWHAB    | VAPB     |
| YWHAE    | VAPA     |
| YWHAG    | ROCK2    |
| YWHAH    | ARHGEF11 |
| ALDH5A1  | PSMD6    |
| USP9X    | DNM1L    |
| SEMA7A   | PPIF     |
| CNTNAP1  | PDIA6    |
| DYNLL1   | BCAP31   |
| ADAM23   | RTN3     |
| RAB11A   | ARL6IP5  |
| NAPA     | NCKAP1   |
| UBE2M    | YWHAQ    |
| ATP6V0D1 | PDCD10   |
| SYNGR3   | EPB41L3  |
| DCLK1    | TARDBP   |
| LGI1     | DDAH2    |
| VAPA     | PRDX5    |
| CPNE6    | GIGYF2   |
| NRXN3    | CYFIP2   |
| ROCK2    | ATL1     |
| ARHGEF11 | DDX47    |
| ACTR3    | VPS35    |
| TUBB3    | RTN4     |
| BASP1    | CORO1B   |
| DPYSL4   | GNB4     |
| NCKAP1   | DNAJC5   |
| PGRMC1   | OBSCN    |
| CYP46A1  | DYNLL2   |
| RAB10    | MAGI3    |
| EHD1     |          |
| YWHAQ    |          |
| RAB35    |          |
| RAB18    |          |
| SIRT2    |          |



CNOT1  
NFASC  
PLXND1  
EPB41L3  
NCDN  
ACSL6  
CNTNAP2  
IFT172  
PHGDH  
NPTN  
TAGLN3  
PACSIN1  
ATL1  
ATP8A2  
PHF10  
TMEM30A  
DPYSL5  
RTN4  
NDRG2  
GNB4  
PGAP1  
EFHD1  
IGSF8  
CEP120  
CADM2  
PTF1A  
NEGR1  
TUBB2B  
POTEG

<sup>a</sup>Number of identified proteins associated with the GO terms with p-value are 11 for angiogenesis with p value 3.24E-04, 76 for anti-inflammation with p value of 4.46E-04, 156 for neurogenesis with p value of 9.87E-30 and 122 for apoptosis with p value of 2.70E-13, respectively.

**Supplementary Table S5. A list of SBE-MSC-MV proteome included in four categories.<sup>b</sup>**

| Angiogenesis | Anti-inflammation | Neurogenesis | Apoptosis |
|--------------|-------------------|--------------|-----------|
| ANXA3        | ACTG1             | ACTG1        | AARS      |
| APOE         | ACTB              | ACTB         | ACO2      |
| ATP5A1       | ANXA3             | AP2A1        | ACTC1     |
| CDC42        | APOE              | AP2A2        | ALDOC     |
| CDH13        | APP               | AP2B1        | BIN1      |
| CSNK2B       | ATP1B1            | ALCAM        | SLC25A6   |
| HBB          | ATP1B2            | BIN1         | ANXA4     |
| RAB13        | BCL6              | ANK2         | ANXA5     |
| RAP1A        | CAMK2A            | APOE         | APOE      |
| PRMT5        | CAMK2B            | APP          | RHOA      |
| NDRG2        | CAMK2D            | RHOA         | ATP2A1    |
|              | CAPZA2            | RHOG         | ATP2B3    |
|              | CDC42             | ATIC         | BCL6      |
|              | CFL1              | ATP2B2       | CALR      |
|              | EIF4A1            | CALR         | CFL1      |
|              | EIF4A2            | CAMK2A       | DAD1      |
|              | EIF4E             | CAMK2B       | DCTN1     |
|              | HMGB1             | CAPZB        | DDX5      |
|              | HPRT1             | CDC42        | DYNC1H1   |
|              | HRAS              | CFL1         | DNM2      |
|              | HSP90AA1          | CKB          | EEF1A2    |
|              | HSP90AB1          | AP2M1        | EEF2      |
|              | HSPD1             | CNP          | GARS      |
|              | ITPR1             | CNTN1        | SFN       |
|              | KPNB1             | CRMP1        | PDIA3     |
|              | KRAS              | CSNK2A1      | HBB       |
|              | KRT1              | CSNK2B       | HINT1     |
|              | MBP               | DBN1         | HK1       |
|              | NCAM1             | DCTN1        | HMGB1     |
|              | NME1              | DPYSL2       | HRAS      |
|              | NRAS              | DPYSL3       | HSPA5     |
|              | PCBP2             | FKBP4        | HSPA9     |
|              | PLP1              | G6PD         | HSP90AB1  |
|              | PPIA              | GAPDH        | HSPD1     |
|              | PPP3CA            | GMFB         | ITPR1     |
|              | PRKACA            | GNAO1        | KIF5A     |
|              | PRKACB            | GNAQ         | KPNB1     |
|              | PRKAR2B           | GPM6A        | KRAS      |
|              | PRKCA             | GPM6B        | KRT8      |

PRKCG  
MAPK1  
MAPK3  
MAP2K1  
PRSS3  
RAC1  
RAC2  
S100A13  
S100B  
SLC3A2  
HSP90B1  
YWHAB  
SEMA7A  
EIF4A3  
ARPC4-TTLL3  
ARPC4  
ARPC3  
ACTR3  
ACTR2  
ARPC2  
ARPC1A  
NCKAP1  
CORO1A  
PHLPP2  
PRDX5  
CYFIP2  
TMED7-TICAM2

HMGB1  
HMGCS1  
HPRT1  
HRAS  
HSPA5  
HSPA8  
HSP90AA1  
HSP90AB1  
KIF5A  
KIF5B  
KIF5C  
KRAS  
LDHA  
LSAMP  
LY6H  
MAP1B  
MBP  
NCAM1  
NF1  
NME1  
NRAS  
OGDH  
PAFAH1B1  
PAFAH1B2  
PLP1  
MAPK1  
MAPK3  
MAP2K1  
PRPS1  
PURA  
RAB3A  
RAB5A  
RAB13  
RAC1  
RAC2  
RAC3  
RAP1A  
RRAS  
RTN1  
RYS2  
S100B  
SH3GL2  
SLC1A2  
SLC1A3

LRP1  
NF1  
NME1  
NME1-NME2  
NRAS  
PFN1  
PKM  
PLP1  
PPP1CA  
PPP2CB  
PPP2R1A  
PPP2R1B  
PPP2R2B  
PRKCA  
PRKCB  
PRKCG  
MAPK1  
MAPK3  
PRPS1  
PSMD2  
PYGL  
RAC1  
RALB  
S100B  
SPTAN1  
SPTBN2  
STXBP1  
HSP90B1  
UBA1  
UCHL1  
VCP  
VDAC1  
WFS1  
YWHAB  
YWHAE  
YWHAG  
YWHAH  
YWHAZ  
RAB7A  
CUL5  
DYNLL1  
SYNJ1  
VAPB  
VAPA

|          |         |
|----------|---------|
| SNAP25   | ROCK2   |
| SPTAN1   | MATR3   |
| SPTBN1   | PDCD6IP |
| SPTBN2   | DNM1L   |
| SYP      | PDIA6   |
| CNTN2    | BCAP31  |
| YWHAB    | RTN3    |
| YWHAE    | GNB2L1  |
| YWHAG    | NCKAP1  |
| YWHAH    | YWHAQ   |
| ALDH5A1  | EPB41L3 |
| USP9X    | TARDBP  |
| SEMA7A   | DDAH2   |
| CNTNAP1  | NGEF    |
| DYNLL1   | PRDX5   |
| ADAM23   | CYFIP2  |
| RAB11A   | ATL1    |
| NAPA     | DDX47   |
| ATP6V0D1 | VPS35   |
| SYNGR3   | RTN4    |
| DCLK1    | GNB4    |
| VAPA     | DNAJC5  |
| CPNE6    | OBSCN   |
| NRXN3    | MAGI3   |
| ROCK2    |         |
| ACTR3    |         |
| TUBB3    |         |
| BASP1    |         |
| DPYSL4   |         |
| NCKAP1   |         |
| PGRMC1   |         |
| RAB10    |         |
| EHD1     |         |
| YWHAQ    |         |
| RAB35    |         |
| RAB18    |         |
| CNOT1    |         |
| NFASC    |         |
| PLXND1   |         |
| EPB41L3  |         |
| NCDN     |         |
| CYFIP1   |         |
| ACSL6    |         |
| IFT172   |         |

|  |  |         |  |
|--|--|---------|--|
|  |  | PHGDH   |  |
|  |  | NPTN    |  |
|  |  | TAGLN3  |  |
|  |  | PACSIN1 |  |
|  |  | ATL1    |  |
|  |  | TMEM30A |  |
|  |  | DPYSL5  |  |
|  |  | RTN4    |  |
|  |  | NDRG2   |  |
|  |  | GNB4    |  |
|  |  | MTPN    |  |
|  |  | CEP120  |  |
|  |  | CADM2   |  |
|  |  | NEGR1   |  |
|  |  | TUBB2B  |  |
|  |  | POTEE   |  |

<sup>b</sup>Number of identified proteins associated with the GO terms with p-value are 11 for angiogenesis with p value 9.45E-05, 66 for anti-inflammation with p value of 1.09E-03, 143 for neurogenesis with p value of 3.72E-30 and 107 for apoptosis with p value of 2.69E-12, respectively.

**Supplementary Table S6. The list of primers used for RT-PCR**

| Target gene        | Primer sequence                                                                    | Product size (bp) |
|--------------------|------------------------------------------------------------------------------------|-------------------|
| rat IL-10          | Forward 5'-ACCTGGTAGAAGTGATGCCCCAGGCA-3'<br>Reverse 5'-CTATGCAGTTGATGAAGATGTCAA-3' | 237               |
| rat PGRN           | Forward 5'-AGTGTCCAGATGGGCAGTTC-3'<br>Reverse 5'-ATTGGGCATTGGACAGCAGC-3'           | 650               |
| rat TSG-6          | Forward 5'-CAGATGGGCTGTACCTTATC-3'<br>Reverse 5'-TGACTCCAAAGTAGACCTGC-3'           | 180               |
| rat TNF- $\alpha$  | Forward 5'-CAGATGGGCTGTACCTTATC-3'<br>Reverse 5'-TGACTCCAAAGTAGACCTGC-3'           | 306               |
| rat $\beta$ -actin | Forward 5'-TCATGAAGTGTGACGTGGACATC-3'<br>Reverse 5'-TGTTGCATTTGCGGGGACGATG-3'      | 282               |
